# Supplementary material for: Exploring avocado consumption and health: a scoping review and evidence map
Source: Front Nutr. 2025 Feb 10;12:1488907. doi: 10.3389/fnut.2025.1488907 (PMC11847682; doi:10.3389/fnut.2025.1488907)
Supplement: Supplementary file 2 [file Data_Sheet_2.xlsx]

## Sheet: Study Level
Index	PMID	DOI	Citation	Primary.Report	Main	Authors	Year	Journal	Title	Abstract	Population.Region	Age.bin	Target.Population	BMI.bin	Cholesterol.bin	X.F.bin	Subject.Notes	SS..Assigned	SS..Completed	Study.Type	Study.Design	Study.Type.Notes	Max.Intervention.Length..days	Intervention.Length	Max.Observational.Follow.up.Length..years	Observational.Follow.up	Form.When.Consumed	Cultivar	Intended.energy.balance.of.subjects	Intended.energy.balance.between.groups	Constant.Macros..detailed	Constant.Macros	Meal.control..detailed	Meal.control	Comparators..detailed	Comparator.Clean	Comparator.model	Measurement.Methods.for.Intake	Nutrient.Ascertainment..detailed	Nutrient.Ascertainment..binned	Funding.Organization..reported	Funding.Organizations..cleaned	Funding.Organizations..binned
1	31616932	https://doi.org/10.1093/jn/nxz231	Wang 2020	NCT01235832	Not unique	Li Wang;Ling Tao;Lei Hao;Todd H Stanley;Kuan-Hsun Huang;Joshua D Lambert;Penny M Kris-Etherton	2020	Journal of Nutrition	A moderate-fat diet with one avocado per day increases plasma antioxidants and decreases the oxidation of small, dense LDL in adults with overweight and obesity: A randomized controlled trial	Background: Avocados are a nutrient-dense source of MUFAs and are rich in antioxidants. Avocados have an additional LDL cholesterol (LDL-C) lowering effect beyond that observed when their MUFAs are substituted for SFAs, especially on small, dense LDL (sdLDL) particles, which are susceptible to in vivo oxidation and associated with increased risk of cardiovascular disease (CVD)._x000D_ Objectives:…	USA	Adult	Dyslipidemia	Overweight or obese	Elevated;Healthy	Mostly male;Balanced	Normal blood pressure or controlled BP with meds, BMI 25-35, LDL-C 25th-90th percentile (105â€“194 mg/dL for males; 98â€“190 mg/dL for females). Subset of subjects from Wang et al., 2015	45	40	Intervention	Crossover	Randomized; crossover;controlled feeding trial	35	1-3 mo	NA	Not specified	As directed/desired	Hass	Weight Maintenance	Isocaloric	No;Yes	No;Yes	Controlled (6-d rotating menu)	Controlled	Low fat diet, 6-7% energy from grain, or moderate fat diet containing oleic acid	No avocado	Replacement	6-day rotating menu provided, nutrient content of the formulated diets analyzed using food processor SQL software, subjects weighed to assess diet compliance	Prescribed	Prescribed	Hass Avocado Board;National Center for Research Resources;National Center for Advancing Translational Sciences	Hass Avocado Board;National Center for Research Resources;National Center for Advancing Translational Sciences	Commodity Boards;Research Institutes
2	24279738	https://doi.org/10.1186/1475-2891-12-155	Wien 2013	NCT01271829	Main	Michelle Wien;Ella Haddad;Keiji Oda;Joan SabatÃ©	2013	Nutrition Journal	A randomized 3Ã—3 crossover study to evaluate the effect of hass avocado intake on post-ingestive satiety, glucose and insulin levels, and subsequent energy intake in overweight adults	Background: The behavioral outcome of food ingestion is a complex process that involves psychological and biological factors. Avocados are nutrient dense with properties that may favorably impact energy balance. This study sought to evaluate if incorporating approximately one half of a Hass avocado by addition or inclusion into a lunch meal will influence post-ingestive satiety, glucose and insul…	USA	Adult	General population	Overweight or obese		Mostly male;Mostly female	BMI 28.1+-2.4, normoglycemic, normotensive, sedentary or low level of habitual activity, non-smoker, not dependent on caffeine, and not taking any medications known to influence postprandial glucose and insulin levels	32	26	Intervention	Crossover	Randomized;3x3;single-blind;crossover	1	Acute	NA	Not specified	As directed/desired	Hass	NA	Hypercaloric;Isocaloric	Yes	Yes	Controlled (acute meal)	Controlled	Salad (mixed greens, cherry tomatoes, reduced fat Swiss cheese, Italian salad dressing) plus French baguette and choc chip cookies w/o avocado	No avocado	Addition;Replacement	Intake directly observed and documented by research staff, with video recording. Leftovers photographed and weighed. Participants asked to record snacks consumed after leaving test kitchen and prior to bed. Snacks self-reported.	NA	NA (acute study)	Hass Avocado Board	Hass Avocado Board	Commodity Boards
3	32805028	https://doi.org/10.1093/jn/nxaa219	Thompson 2021	Persea americana for Total Health (PATH) Study (NCT02740439)	Unique	Sharon V Thompson;Melisa A Bailey;Andrew M Taylor;Jennifer L Kaczmarek;Annemarie R Mysonhimer;Caitlyn G Edwards;Ginger E Reeser;Nicholas A Burd;Naiman A Khan;Hannah D Holscher	2021	The Journal of Nutrition	Avocado consumption alters gastrointestinal bacteria abundance and microbial metabolite concentrations among adults with overweight or obesity: A randomized controlled trial	Background: Avocados are rich in dietary fiber and monounsaturated fatty acids (MUFAs), nutrients that have been independently connected to metabolic health benefits and the gastrointestinal microbiota._x000D_ _x000D_ Objectives: We aimed to evaluate the impact of avocado consumption on the gastrointestinal microbiota and microbial metabolites, secondary outcomes of the Persea americana for Total…	USA	Adult	General population	Overweight or obese		Mostly female	BMI >=25, non-pregnant, non-smoking, no diagnosis of metabolic or GIT disease, no food allergies or intolerances, no medications that impact bowel functions, no restrictive bariatric surgery within prev 2 yrs	163	109	Intervention	Parallel-arm	Randomized;investigator-blinded;parallel-arm;controlled trial	84	1-3 mo	NA	Not specified	As directed/desired	Hass	Weight Maintenance	Isocaloric	Yes	Yes	Partial ad libitum, controlled (meals only)	Controlled	Isocaloric control meal, 0 g avocado, matched for macronutrient composition	No avocado	Replacement	7-day menu cycle provided, diet records analyzed using NDSR 2015	7-d diet records	3-7d diet records	Hass Avocado Board;USDA National Institute of Food and Agriculture	Hass Avocado Board;USDA	Commodity Boards;Research Institutes
4	24899156	https://doi.org/10.3945/jn.113.187674	Kopec 2014	NCT01432210	Main	Eun Seok Kim;Moses Adriko;Wamboko Aidah;Kabarangira Christine Oseku;David Lokure;Kalpana Sabapathy;Emily L. Webb	2014	The Journal of Nutrition	Avocado consumption enhances human postprandial provitamin a absorption and conversion from a novel high-Î²-carotene tomato sauce and from carrots	Dietary lipids have been shown to increase bioavailability of provitamin A carotenoids from a single meal, but the effects of dietary lipids on conversion to vitamin A during absorption are essentially unknown. Based on previous animal studies, we hypothesized that the consumption of provitamin A carotenoids with dietary lipid would enhance conversion to vitamin A during absorption compared with …	USA	Adult	General population	Healthy weight;Overweight or obese	Healthy	Mostly male;Balanced	Non-pregnant, non-smoking, normocholesterolemic, normolipidemic, no history of cancer, no GIT disease, no diabetes, no meds taken affecting lipid uptake or transport, BMI of 17â€“30 kg/m2	24	23	Intervention	Crossover	Randomized;2-way;crossover trial	1	Acute	NA	Not specified	As directed/desired	Hass	NA	Hypercaloric	No	No	Controlled (acute meal)	Controlled	Test meal (tomato sauce or carrots) w/o avocado	No avocado	Addition	Experimenter provided all meals	NA	NA (acute study)	Hass Avocado Board;National Center for Research Resources;Nutrient and Phytochemical Analytic Shared Resource of Ohio State	Hass Avocado Board;National Center for Research Resources;Nutrient and Phytochemical Analytic Shared Resource of Ohio State	Commodity Boards;Research Institutes;Universities
5	28832514	https://doi.org/10.3390/nu9090919	Scott 2017	NCT01621646	Main	Tammy M. Scott;Helen M. Rasmussen;Oliver Chen;Elizabeth J. Johnson	2017	Nutrients	Avocado consumption increases macular pigment density in older adults: A randomized, controlled trial	Lutein is selectively incorporated into the macula and brain. Lutein levels in the macula (macular pigment; MP) and the brain are related to better cognition. MP density (MPD) is a biomarker of brain lutein. Avocados are a bioavailable source of lutein. This study tests the effects of the intake of avocado on cognition. This was a six-month, randomized, controlled trial. Healthy subjects consumed…	USA	Adult	General population	Healthy weight	Elevated;Healthy	Balanced;Mostly female	Non-smoking, no liver, kidney or pancreatic disease, no anemia, no bowel disease, no bleeding disorders, no avo, chickpea or potato allergies, no meds that could interfere with fat absorption, nutrient supplement in previous 2 mths	48	40	Intervention	Parallel-arm	Randomized;controlled trial	168	3-6 mo	NA	Not specified	As directed/desired	Hass	No intent	Isocaloric	Yes (unintentionally)	No	Ad libitum	Ad libitum	0 mg/day lutein (1 potato OR 1 cup chickpeas)	No avocado	Replacement	FFQ (expanded 131-item semiquantitative), monthly interviews with dietician, semi-monthly telephonic monitoring	FFQ	FFQ	Hass Avocado Board;USDA	Hass Avocado Board;USDA	Commodity Boards;Research Institutes
6	30213052	https://doi.org/10.3390/nu10091287	Park 2018	NCT02479048	Main	Eunyoung Park;Indika Edirisinghe;Britt Burton-Freeman	2018	Nutrients	Avocado fruit on postprandial markers of cardio-metabolic risk: A randomized controlled dose response trial in overweight and obese men and women	Avocados are distinctive fruits having both fats and fibers along with various micronutrients and bioactive phytochemicals. This study aimed to assess the effects of replacing carbohydrate energy in meals with half or whole avocado on postprandial indices of metabolic and vascular health. A single-center, randomized, controlled, 3-arm, 6 h, crossover study was conducted in overweight/obese middle…	USA	Adult	General population	Overweight or obese		Mostly male;Balanced	Non-smoking, BMI 25-35 kg/m^2, elevated fasting glucose (5-6.4 mmol/L) and insulin (<=90.3 pmol/L), no history of CVD, respiratory, renal, GIT, hepatic disease	39	31	Intervention	Crossover	Randomized;single-centre; controlled;3-arm;6h;crossover;dose response trial	1	Acute	NA	Not specified	As directed/desired	Hass	NA	Isocaloric	No	No	Controlled (acute meal)	Controlled	0g avocado	No avocado	Replacement	Questionnaires (food processor pro SQL V10.15.41), 24h dietary recall	NA	NA (acute study)	Hass Avocado Board	Hass Avocado Board	Commodity Boards
8	25567051	https://doi.org/10.1161/JAHA.114.001355	Wang 2015	NCT01235832	Main	Li Wang;Peter L. Bordi;Jennifer A. Fleming;Alison M. Hill;Penny M. Krisâ€Etherton	2015	Journal of the American Heart Association	Effect of a moderate fat diet with and without avocados on lipoprotein particle number, size and subclasses in overweight and obese adults: A randomized, controlled trial	Background: Avocados are a nutrient-dense source of monounsaturated fatty acids (MUFA) that can be used to replace saturated fatty acids (SFA) in a diet to lower low density lipoprotein cholesterol (LDL-C). Well-controlled studies are lacking on the effect of avocado consumption on cardiovascular disease (CVD) risk factors._x000D_ _x000D_ Methods and results: A randomized, crossover, controlled f…	USA	Adult	Dyslipidemia	Overweight or obese	Healthy;Elevated	Mostly male;Balanced	BMI: 28.2+-2.4 kg/m^2, LDL-C in the 25th to 90th percentile, normal blood pressure (<=140/90 mmHg), non-smokers, free of CVD, diabetes, liver, or renal disease, and not taking lipid-lowering medications or supplements. These are the same subjects as shown in Li 2019	45	40	Intervention	Crossover	Randomized;3-period;crossover;controlled feeding trial	35	1-3 mo	NA	Not specified	As directed/desired	Hass	Weight Maintenance	Isocaloric	No;Yes	No;Yes	Controlled (6-d rotating menu)	Controlled	Low fat diet, medium fat diet, both w/o avocado	No avocado	Replacement	Weighed daily, 6-day rotating menu provided, menus developed using Food Processor SQL software	Prescribed	Prescribed	Hass Avocado Board	Hass Avocado Board	Commodity Boards
9	31846631	https://doi.org/10.1016/j.ijpsycho.2019.12.006	Edwards 2020	Persea americana for Total Health (PATH) Study (NCT02740439)	Main	Caitlyn G. Edwards;Anne M. Walk;Sharon V. Thompson;Ginger E. Reeser;John W. Erdman;Nicholas A. Burd;Hannah D. Holscher;Naiman A. Khan	2020	International Journal of Psychophysiology	Effects of 12-week avocado consumption on cognitive function among adults with overweight and obesity	Objectives: Excess adiposity increases risk for cognitive impairment. Consumption of avocado, a highly bioavailable source of the xanthophyll lutein, has been shown to improve retinal lutein accumulation and cognitive function. Thus, we evaluated the influence of avocado consumption on cognitive function and lutein status among adults with overweight and obesity using a randomized-controlled tria…	USA	Adult	General population	Overweight or obese		Balanced	BMI >=25, non-pregnant, no history of chronnic metabolic disease, normal vision, no food allergies or intolerances	163	84	Intervention	Parallel-arm	Randomized;single blind controlled trial	84	1-3 mo	NA	Not specified	As directed/desired	Hass	Weight Maintenance	Isocaloric	Yes	Yes	Partial ad libitum, controlled (meals only)	Controlled	Isocaloric control meal, 0 g avocado, matched for macronutrient composition	No avocado	Replacement	7-day menu cycle provided	7-d diet records	3-7d diet records	Hass Avocado Board;Department of Kinesiology and Community Health at the University of Illinois;USDA National Institute of Food and Agriculture	Hass Avocado Board;Department of Kinesiology and Community Health at the University of Illinois;USDA	Commodity Boards;Universities;Research Institutes
11	23196671	https://doi.org/10.1039/C2FO30226H	Li 2013	Li 2013	Main	R LÃ³pez Ledesma;A C Frati Munari;B C HernÃ¡ndez DomÃ­nguez;S Cervantes Montalvo;M H HernÃ¡ndez Luna;C JuÃ¡rez;S MorÃ¡n Lira	2013	Food & Function Journal	Hass avocado modulates postprandial vascular reactivity and postprandial inflammatory responses to a hamburger meal in healthy volunteers	Hass avocados are rich in monounsaturated fatty acids (oleic acid) and antioxidants (carotenoids, tocopherols, polyphenols) and are often eaten as a slice in a sandwich containing hamburger or other meats. Hamburger meat forms lipid peroxides during cooking. After ingestion, the stomach functions as a bioreactor generating additional lipid peroxides and this process can be inhibited when antioxid…	USA	Adult	General population	Healthy weight		Mostly male	No metabolic disorders, no dietary supplements, non-smoking, no heavy exercise, little alcohol allowed	11	11	Intervention	Crossover	Randomized;crossover trial	1	Acute	NA	Not specified	As directed/desired	Hass	NA	Hypercaloric	No	No	Controlled (acute meal)	Controlled	Ground beef patty w/o avocado	No avocado	Addition	Participants monitored in lab, provided only the control (burger patty) and treatment (burger patty + avocado) foods	NA	NA (acute study)	Hass Avocado Board	Hass Avocado Board	Commodity Boards
12	30096700	https://doi.org/10.1016/j.eatbeh.2018.08.001	Haddad 2018	NCT01271829	Not unique	Vivienne X. Guan;Elizabeth P. Neale;Yasmine C. Probst	2018	Eating Behaviors	Postprandial gut hormone responses to hass avocado meals and their association with visual analog scores in overweight adults: A randomized 3 Ã— 3 crossover trial	Objective: To evaluate changes in postingestive gut hormone concentrations from the consumption of Hass avocado by addition or inclusion to lunch test meals, and to examine their association with measures of appetite sensation._x000D_ _x000D_ Methods: A randomized 3 Ã— 3 crossover study was conducted with 26 healthy overweight adults. Participants consumed one of three test meals: avocado-free co…	USA	Adult	General population	Overweight or obese		Mostly male;Mostly female	BMI 25-35, normoglycemic, normotensive, sedentary, non-smoker, <2 cups caffeine beverage, no meds known to influence postprandial glucose and insulin levels	32	26	Intervention	Crossover	Randomized;3x3;single-blind;crossover trial	1	Acute	NA	Not specified	As directed/desired	Hass	NA	Hypercaloric;Isocaloric	Yes	Yes	Controlled (acute meal)	Controlled	No avocado (Control: mixed green salad, cherry tomatoes, reduced fat Swiss cheese, Italian salad dressing, baguette, choc chip cookies) vs Avocado inclusive vs avocado added	No avocado	Addition;Replacement	Not specified	NA	NA (acute study)	Hass Avocado Board	Hass Avocado Board	Commodity Boards
13	24916552	https://doi.org/10.1016/j.nutres.2014.04.005	Khor 2014	Khor 2014	Main	Naiman A Khan;Caitlyn G Edwards;Sharon V Thompson;Bridget A Hannon;Sarah K Burke;Anne D M Walk;Richard W A Mackenzie;Ginger E Reeser;Barbara H Fiese;Nicholas A Burd;Hannah D Holscher	2014	Nutrition Research	Postprandial oxidative stress is increased after a phytonutrient-poor food but not after a kilojoule-matched phytonutrient-rich food	Research indicates that energy-dense foods increase inflammation and oxidative activity, thereby contributing to the development of vascular disease. However, it is not clear whether the high kilojoule load alone, irrespective of the nutritional content of the ingested food, produces the postprandial oxidative and inflammatory activity. This study investigated the hypothesis that ingestion of a h…	Australia	Adult	General population		Elevated;Healthy	Mostly male;Balanced	No history of: inflammatory disease, diabetes, CVD, cancer acute URTI, lactose intolerance, food allergies, meds or vit supplements within 48h of commencement	11	8	Intervention	Crossover	Randomized;crossover trial	1	Acute	NA	Not specified	As directed/desired	Not specified	NA	Isocaloric	No	No	Controlled (acute meal)	Controlled	Ice cream or ice cream components (sugar, cream) w/o avocado	No avocado	Replacement	Not specified	NA	NA (acute study)	Australasian Research Institute	Australasian Research Institute	Research Institutes
14	32195538	https://doi.org/10.1093/jn/nxaa054	Hannon 2020	Persea americana for Total Health (PATH) Study (NCT02740439)	Unique	Ella Haddad;Michelle Wien;Keiji Oda;Joan SabatÃ©	2020	The Journal of Nutrition	Single nucleotide polymorphisms related to lipoprotein metabolism are associated with blood lipid changes following regular avocado intake in a randomized control trial among adults with overweight and obesity	Background: Avocados are rich in unsaturated fat and fiber; clinical trials have investigated their effects on metabolic disease. There is high variability in individual changes following avocado consumption, which may be in part due to individual genetic differences._x000D_ _x000D_ Objective: Secondary analyses of the Persea americana for Total Health (PATH) Study were used to examine how single…	USA	Adult	General population	Overweight or obese	Healthy	Mostly male	BMI >=25, no GIT or metabolic disease	163	115	Intervention	Parallel-arm	Randomized;single blind controlled trial	84	1-3 mo	NA	Not specified	As directed/desired	Hass	Weight Maintenance	Isocaloric	Yes	Yes	Partial ad libitum, controlled (meals only)	Controlled	Isocaloric control meal, 0 g avocado, matched for macronutrient composition	No avocado	Replacement	Participants collect meals 2x/week, 7-day menu cycle	7-d diet records	3-7d diet records	Hass Avocado Board;Department of Kinesiology and Community Health at the University of Illinois;USDA National Institute of Food and Agriculture	Hass Avocado Board;Department of Kinesiology and Community Health at the University of Illinois;USDA	Commodity Boards;Universities;Research Institutes
15	15661480	https://doi.org/10.1016/j.nut.2004.09.010	Pieterse 2005	Pieterse 2005	Main	Z. Pieterse;J.C. Jerling;W. Oosthuizen;H.S. Kruger;S.M. Hanekom;C.M. Smuts;A.E. Schutte	2005	Nutrition Journal	Substitution of high monounsaturated fatty acid avocado for mixed dietary fats during an energy-restricted diet: Effects on weight loss, serum lipids, fibrinogen, and vascular function	Objective: First, we wanted to dispel the myth that avocados are fattening and therefore should be avoided in energy-restricted diets. Second, we examined the effects of avocados, a rich source of monounsaturated fatty acids, as part of an energy-restricted diet on weight loss, serum lipids, fibrinogen, and vascular function in overweight and obese subjects._x000D_ _x000D_ Methods: Sixty-one free…	South Africa	Adult	Dyslipidemia;General population	Overweight or obese	Healthy;Elevated	Balanced;Mostly female	BMI >=27, no diabetes, no other chronic disease, dyslipidemia and hypertension participants included but not the intended population	61	55	Intervention	Parallel-arm	Randomized;controlled;parallel;interventiontrial	42	1-3 mo	NA	Not specified	As directed/desired	Not specified	Weight loss	Isocaloric	Yes	Yes	Controlled	Controlled	Diet without avocado with similar energy, fat, carbohydrates, and protein. Avocado replaced mixed fat in prescribed diet (e.g., margarine, mayonnaise, oil).	No avocado	Replacement	Weekly reinforcement of dietary prescription and provision of avocados, two separate 7-day menu plans. Intake not explicitly measured.	Prescribed, not measured	Prescribed	South African Avocado Growers Association;South African Governmentâ€™s Technology and Human Resources for Industry Program	South African Avocado Growers Association;South African Governmentâ€™s Technology and Human Resources for Industry Program	Commodity Boards;Research Institutes
16	31035472	https://doi.org/10.3390/nu11050952	Zhu 2019	NCT02479048	Not unique	Lanjun Zhu;Yancui Huang;Indika Edirisinghe;Eunyoung Park;Britt Burton-Freeman	2019	Nutrients	Using the avocado to test the satiety effects of a fat-fiber combination in place of carbohydrate energy in a breakfast meal in overweight and obese men and women: A randomized clinical trial	This study aimed to investigate the satiety effects of isocalorically replacing carbohydrate energy in a meal with avocado-derived fats and fibers. In a randomized 3-arm, 6-h, crossover clinical trial, thirty-one overweight/obese adults consumed a low-fat control meal (CON, 76% carbohydrate, 14% fat as energy, 5 g fiber, ~640 kcal) or high-fat meals similar in total fat and energy, but increasing…	USA	Adult	General population	Overweight or obese		Balanced	BMI 25-35 kg/m^2, with elevated fasting glucose and insulin conc, non-pregnant, non-smoking, no interefering medications, no allergies or sensetivities	39	31	Intervention	Crossover	Randomized;3-arm;6h;acute;crossover;clinical trial	1	Acute	NA	Not specified	As directed/desired	Hass	NA	Isocaloric	No	No	Controlled (acute meal)	Controlled	Low fat, high carb meal	No avocado	Replacement	Meal consumed on-site, nutrients of food ingredients analyzed by Food Processor Pro SQL (v 10.15.41)	NA	NA (acute study)	Hass Avocado Board	Hass Avocado Board	Commodity Boards
18	15735074	https://doi.org/10.1093/jn/135.3.431	Unlu 2005	Unlu 2005	Main	Nuray Z. Unlu;Torsten Bohn;Steven K. Clinton;Steven J. Schwartz	2005	The Journal of Nutrition	Carotenoid absorption from salad and salsa by humans is enhanced by the addition of avocado or avocado oil	Dietary lipids are hypothesized to be an important factor for carotenoid bioavailability. However, mostcarotenoid-rich fruits and vegetables are low in lipids. The objective of this study was to assess whether theaddition of avocado fruit as a lipid source enhances carotenoid absorption in humans. Healthy subjects (n11/study) were recruited for 2 crossover, postprandial studies. The effect of avo…	USA	Adult	General population	Overweight or obese;Healthy weight	Healthy;Elevated	Mostly male;Balanced	Non-pregnant, non-smoking, no hyperlipidemia, no GIT disease, no meds affecting lipid metabolism, no frequent carotenoid supplements, no frequent alcohol consumption	11	8	Intervention	Crossover	Crossover;acute trial	1	Acute	NA	Not specified	As directed/desired	Hass	NA	Hypercaloric	No	No	Controlled (acute meal)	Controlled	Study 1: salsa w/o avocado. Study 2: salad w/o avocado	No avocado	Addition	Meal consumed on-site	NA	NA (acute study)	California Avocado Commission;General Clinical Research Center at the OSU;National Center of Reserach Resources of the NIH;Comprehenisve Cancer Center from the NCI	California Avocado Commission;General Clinical Research Center at the OSU;National Center of Reserach Resources of the NIH;Comprehenisve Cancer Center from the NCI	Commodity Boards;Universities;Research Institutes
19	1414966	https://doi.org/10.1093/ajcn/56.4.671	Colquhoun 1992	Colquhoun 1992	Main	DM Colquhoun;D Moores;SM Somerset;JA Humphries	1992	The American Journal of Clinical Nutrition	Comparison of the effects on lipoproteins and apolipoproteins of a diet high in monounsaturated fatty acids, enriched with avocado, and a high-carbohydrate diet	A randomized trial was conducted to compare effects of a diet high in monounsaturated fatty acids, enriched with avocado (AE), and a high-complex-carbohydrate diet (AHA-III) on blood lipid concentrations. Fifteen females between 37 and 58 y of age were allocated either to AE followed by AHA-III, or vice versa. Each dietary phase lasted 3 wk. Both diets were found to lower total cholesterol compar…	Australia	Adult	General population		Elevated;Healthy	Mostly female	Sedentary occupations, 53-105kg, serum cholesterol 4.0-8.0 mmol/L	15	15	Intervention	Crossover	Two-arm;randomized;crossover trial	21	2-30 d	NA	Not specified	As directed/desired	Sharwill, Hass	Weight Maintenance	Isocaloric	No	No	Partial ad lib (controlled amount and macros)	Controlled	Low fat diet and pre-entry diet, statistical comparisons only made to pre-entry diet	No avocado	Replacement	3-day dietary diary, weekly dietitian to ensure diet adherence, analyzed by 1989 Australian Food Data Base (NUTTAB89). Foods themselves were weighed	3-d records	3-7d diet records	Australian Avocado Growers' Federation	Australian Avocado Growers' Federation	Commodity Boards
21	NA	http://dx.doi.org/10.1088/1755-1315/448/1/012027	Utari 2020	Utari 2020	Main	R Utari;Y Setyaningsih;A Suwondo	2020	IOP Conference Series: Earth and Environmental Science	The effect of giving avocados (Persea americana mill) and guava (Psidium guajava linn) on hemoglobin levels in traditional rice farmers	Data of Puskesmas (Public Health Center) profile was obtained from Hiang Lestari village midwife, showed that 38% of rice farmers develop anemia. The objective of research was to find out the effect of Avocado (Persea americana mill) and Guava (Psidium guajava linn) administration on Hemoglobin level in Traditional Rice Farmers in Hiang Lestari village. This study was a quasi-experiment research …	Indonesia		General population			Mostly female	Traditional female farmers, "normal point," high school education, 5-10 years farming	30	30	Intervention	Parallel-arm	Parallel arm intervention trial	14	2-30 d	NA	Not specified	As directed/desired	Not specified	No intent	No intent	Not reported	Not reported	Ad libitum	Ad libitum	100g/d guava only (not really a control group)	No avocado	Replacement	Not specified	Not measured	Not measured	Not specified	Not specified	Not specified
23	30909592	https://doi.org/10.3390/nu11030691	Heskey 2019	Adventist Health Study (AHS-2)	Main	Susanne M. Henning;Jeraldine B. Guzman;Gail Thames;Jieping Yang;Chiâ€Hong Tseng;David Heber;Jenny Kim;Zhaoping Li	2019	Nutrients	Avocado intake, and longitudinal weight and body mass index changes in an adult cohort	Avocados contain nutrients and bioactive compounds that may help reduce the risk of becoming overweight/obese. We prospectively examined the effect of habitual avocado intake on changes in weight and body mass index (BMI). In the Adventist Health Study (AHS-2), a longitudinal cohort (~55,407; mean age ~56 years; U.S. and Canada), avocado intake (standard serving size 32 g/day) was assessed by a f…	Canada;USA	Adult	General population	Underweight;Healthy weight;Overweight or obese		Mostly female	non-smoking, non-pregnant, 4.2% vegan, 31.6% lacto-ovo vegetarian, 11.4% pesco-vegetarian, 52.9% non-vegetarian, BMI between 18 and 40 kg/m^2, female height 142-183 cm, male height 152-198 cm	77154	55407	Observation	Cohort	Prospective, longitudinal, cohort trial	NA		11	7-15 years	Avocado and guacamole	Not specified	NA	NA	NA	NA	NA	NA	Non- or low-consumers	Dose-response	NA	FFQ (204-item quantitative), 24h dietary recall to validate avocado intake	FFQ	FFQ	Hass Avocado Board;National Institue of Health;National Cancer Institute	Hass Avocado Board;NIH;National Cancer Institute	Commodity Boards;Research Institutes
24	NA	http://dx.doi.org/10.18103/imr.v3i4.422	O'Neil 2017	National Health and Nutrition Examination Survey (NHANES 2001-2012)	Main	Gladys Morales;Teresa Balboa-Castillo;RubÃ©n FernÃ¡ndez-RodrÃ­guez;Miriam Garrido-Miguel;Camilo Molino Guidoni;Rafaela Sirtoli;Arthur Eumann Mesas;Renne Rodrigues	2017	Internation Medicine Review	Avocado consumption by adults is associated with better nutrient intake, diet quality, and some measures of adiposity: National Health and Nutrition Examination Survey, 2001-2012	Background Avocados contain a beneficial lipid profile, including a high level of monounsaturated fatty acids, as well as dietary fiber, essential nutrients, and phytochemicals. However, little epidemiologic data exist on the effect that consumption of avocados has on overall nutrient intake, diet quality, adiposity parameters, and other metabolic disease risk factors. Objective The objective of …	USA	Adult	General population	Underweight;Overweight or obese	Elevated;Healthy	Balanced	non-pregnant, non-lactating	27684	27684	Observation	Survey	Survey (NHANES 2001-2012)	NA		0	Cross-sectional	Raw avocado only	Hass;Florida	NA	NA	NA	NA	NA	NA	Non-consumers	No avocado	NA	Day 1, in-person 24h dietary recall interviews (automated multiple pass method)	24-hr Recalls	24-hr Recalls	Hass Avocado Board;Nutrition Impact, LLC;USDA ARS	Hass Avocado Board;Nutrition Impact, LLC;USDA	Commodity Boards;Other;Research Institutes
25	23282226	https://doi.org/10.1186/1475-2891-12-1	Fulgoni 2013	National Health and Nutrition Examination Survey (NHANES 2001-2008)	Main	Victor L Fulgoni;Mark Dreher;Adrienne J Davenport	2013	Nutrition Journal	Avocado consumption is associated with better diet quality and nutrient intake, and lower metabolic syndrome risk in US adults: Results from the National Health and Nutrition Examination Survey (NHANES) 2001-2008	Background: Avocados contain monounsaturated fatty acids (MUFA) dietary fiber, essential nutrients and phytochemicals. However, no epidemiologic data exist on their effects on diet quality, weight management and other metabolic disease risk factors. The objective of this research was to investigate the relationships between avocado consumption and overall diet quality, energy and nutrient intakes…	USA		General population	Overweight or obese	Healthy	Balanced		17567	17567	Observation	Survey	Survey (NHANES 2001-2008)	NA		0	Cross-sectional	Not specified	Hass;Florida	NA	NA	NA	NA	NA	NA	Non-consumers	No avocado	NA	24h dietary recalls (automated multiple pass method) MPED V 1 and 2, diet quality by USDA HEI-2005	24-hr Recalls	24-hr Recalls	Hass Avocado Board	Hass Avocado Board	Commodity Boards
29	9428580	https://europepmc.org/article/med/9428580	Carranza-Madrigal 1997	Carranza-Madrigal 1997	Main	J Carranza-Madrigal;Jorge Eduardo Herrera-Abarca;Mario Alvizouri-Munoz;Maria Del Rosario Alvarado-Jimenez;F Chavez-Carbajal	1997	Archives of Medical Research	Effects of a vegetarian diet vs. a vegetarian diet enriched with avocado in hypercholesterolemic patients	To determine the effects of a vegetarian diet with avocado as a source of monounsaturated fat on serum lipids, thirteen patients with phenotype II (twelve with IIa and one with IIb) dyslipidemia were included in a prospective, transversal and comparative study in which three four-week diets randomly assigned were assessed. One vegetarian diet (ALVD) was composed of 70% carbohydrates, 10% proteins…	Mexico	Adult	Dyslipidemia	Overweight or obese	Elevated;Healthy	Mostly male;Mostly female	Population=Phenotype II dyslipidemia, sedentary, vegetarian naive; 1 male drop out (included in free diet and control measurements) missing for AVLD vs AVD= males poorly represented	13	12	Intervention	Crossover	Crossover trial;3x3	28	2-30 d	NA	Not specified	As directed/desired	Hass	Weight Maintenance	Isocaloric;No intent	No	No	Ad libitum;Controlled	Ad libitum;Controlled	Vegetarian diet without avocado (70% carb, 20% fats- soy and safflower); pre-trial measurements	No avocado	Addition;Replacement	Meals consumed on-site (except for free diet with avocado which was at home)	Prescribed, not measured	Prescribed	Consejo Nacional de Ciencia y Tecnologia (CONACYT);Patronato para la Investigacion y Educacion Medicas (PIEM)	Consejo Nacional de Ciencia y TecnologÃ­a (CONACyT);Patronato para la Investigacion y Educacion Medicas (PIEM)	Research Institutes
30	8987188	https://pubmed.ncbi.nlm.nih.gov/8987188/	Ledesma 1996	Ledesma 1996	Main	Rachel E. Kopec;Jessica L. Cooperstone;Ralf M. Schweiggert;Gregory S. Young;Earl H. Harrison;David M. Francis;Steven K. Clinton;Steven J. Schwartz	1996	Archives of Medical Research	Monounsaturated fatty acid (avocado) rich diet for mild hypercholesterolemia	To assess the effect of a high monounsaturated fatty acids (MFA) diet on serum lipids, 30 healthy adult normolipidemic volunteers and 37 adult patients with mild hypercholesterolemia (5.4-9.3 mmol/l), 15 of them also with hypertriglyceridemia (2.3-4.8 mmol/l), were studied. Fifteen healthy and 30 hypercholesterolemic subjects (15 of them with associated type 2 diabetes mellitus) received an avoca…	Mexico	Adult	Dyslipidemia		Elevated;Healthy	Mostly male;Balanced;Mostly female	Two cohorts: healthy and hypercholesterolemic	67	67	Intervention	Parallel-arm	Randomized controlled trial	7	2-30 d	NA	Not specified	As directed/desired	Hass	Weight maintenance	Isocaloric	Yes	Yes	Controlled	Controlled	Pre/ post; Control diet= higher in saturated fat, PUFA, cholesterol (no avocado)	No avocado	Replacement	Meals consumed on-site	Prescribed, direct observation	Prescribed	Not specified	Not specified	Not specified
31	1308699	https://pubmed.ncbi.nlm.nih.gov/1308699/	Alvizouri-MuÃ±oz 1992	Alvizouri-MuÃ±oz 1992	Main	M Alvizouri-MuÃ±oz;J Carranza-Madrigal;J E Herrera-Abarca;F ChÃ¡vez-Carbajal;J L Amezcua-Gastelum	1992	Archives of Medical Research	Effects of avocado as a source of monounsaturated fatty acids on plasma lipid levels	To examine the effects of avocado on plasma lipid concentrations, a three-diet trial involving 16 healthy volunteers was carried out. A diet rich in monounsaturated fatty acids using avocado as their major source (30% of the total energy was consumed as fat: 75% of the total fat from the avocado), with restriction of saturated fats and less than 300 mg of cholesterol per day was evaluated. Subjec…	Mexico	Adult	General population	Healthy weight	Healthy;Elevated	Mostly male;Balanced	One drop out (completed 2/3 diets)	16	15	Intervention	Crossover	Crossover;3x3	14	2-30 d	NA	Not specified	As directed/desired	Hass	Weight Maintenance	Isocaloric;No intent	No	No	Controlled;Ad libitum	Controlled;Ad libitum	"Control" conditions not specified (assumed prior to the study), Low Sat Fat diet	No avocado	Replacement;Addition	Meal consumed on-site (except for free diet with avocado)	Prescribed, not measured	Prescribed	Consejo Nacional de Ciencia y Tecnologia (CONACYT)	Consejo Nacional de Ciencia y TecnologÃ­a (CONACyT)	Research Institutes
34	34191028	https://doi.org/10.1093/jn/nxab187	Khan 2021	Persea americana for Total Health (PATH) Study (NCT02740439)	Unique	Maria D. Jackson;Susan P. Walker;Candace M. Simpson-Smith;Carole M. Lindsay;Garret Smith;Norma McFarlane-Anderson;Franklyn I. Bennett;Kathleen C. M. Coard;William D. Aiken;Trevor Tulloch;Tomlin J. Paul;Robert L. Wan	2021	Journal of nutrition	Avocado consumption, abdominal adiposity, and oral glucose tolerance among persons with overweight and obesity	Background:Â Although intake of Hass avocado has been cross-sectionally linked to lower abdominal obesity, knowledge of the effects of avocado consumption on abdominal adiposity and glycemic outcomes remains limited. Objective:Â The effects of avocado consumption on abdominal adiposity, insulin resistance, oral-glucose-tolerance test (OGTT), and estimated Î²-cell function were evaluated. Methods:…	USA	Adult	General population	Overweight or obese		Mostly female;Balanced	PATH1	163	105	Intervention	Parallel-arm	Randomized controlled trial	84	1-3 mo	NA	Not specified	As directed/desired	Hass	Weight Maintenance	Isocaloric	Yes	Yes	Partial ad libitum, controlled (meals only)	Controlled	Control group (higher SFA/ lower MUFA)	No avocado	Replacement	Meal prep on site, consumed at home, dietary records indicated intake	7-d diet records	3-7d diet records	Hass Avocado Board	Hass Avocado Board	Commodity Boards
35	31162586	https://doi.org/10.1093/jn/nxz076	Mao 2019	Coronary Artery Risk Development in Young Adults Study (CARDIA)	Main	Alice H. Lichtenstein;Penny M. Krisâ€Etherton;Kristina S. Petersen;Nirupa R. Matthan;Samuel Barnes;Mara Z. Vitolins;Zhaoping Li;Joan SabatÃ©;Sujatha Rajaram;Shilpy Chowdhury;Kristin M. Davis;Jean Galluccio;Cheryl H. Gilhooly;Richard S. Legro;Jason Li;Laura Lovato;Letitia H. Perdue;Gayle Petty;Anna M. Rasmussen;Gina Segoviaâ€Siapco;Rawiwan Sirirat;April Sun;David M. Reboussin	2019	The Journal of Nutrition	Intake of vegetables and fruits through young adulthood is associated with better cognitive function in midlife in the US general population	Background.Vegetables and fruits (VF) may differentially affect cognitive functions, presumably due to their various nutrient contents, but evidence from epidemiologic studies is limited.Objectives.The aim of this study was to examine the long-term association between VF intakes, including VF subgroups, in young adulthood and cognitive function in midlife.Methods.A biracial cohort of 3231 men and…	USA	Adult	General population		Healthy;Elevated	Balanced;Mostly female	Cohort balanced for representative population	5115	3231	Observation	Cohort	Prospective cohort (CARDIA)	NA		25	15+ years	Avocado and guacamole	Not specified	NA	NA	NA	NA	NA	NA	Non- or low-consumers	Dose-response	NA	Monthly diet history questionnaire baseline, 7 yrs, 20 years; Translated to adapted nutrient database	CARDIA diet history quiestionnaire	FFQ	Intramural Research Program of the National Institute on Aging (NIA);National Heart, Lung, and Blood Institute (NHLBI);University of Alabama at Birmingham;Northwestern University;University of Minnesota;Kaiser Foundation Research Institute;Johns Hopkins University School of Medicine;NIH grants	Intramural Research Program of the National Institute on Aging (NIA);NHLBI;University of Alabama at Birmingham;Northwestern University;University of Minnesota;Kaiser Foundation Research Institute;Johns Hopkins University School of Medicine;NIH	Research Institutes;Universities
36	34722611	https://doi.org/10.3389/fnut.2021.746453	Cheng 2021	National Health and Nutrition Examination Survey (NHANES 2011-2014)	Main	Feon W. Cheng;Nikki A. Ford;Matthew K. Taylor	2021	Frontiers in Nutrition	US older adults that consume avocado or guacamole have better cognition than non-consumers: National Health and Nutrition Examination Survey 2011â€“2014	Purpose:Â The goal of this study is to examine how avocado relates to cognitive function among older adults.Â Methods:Â A total of 2,886 National Health and Nutrition Examination Survey 2011-2014 participants aged 60 or older met the eligibility criteria and were included of our cross-sectional study. Participants were binarily classified as avocado consumers (i.e., reported consuming any avocado…	USA	Senior	General population	Overweight or obese		Balanced;Mostly female		2886	2886	Observation	Survey	Survey (NHANES 2011-2014)	NA		0	Cross-sectional	Avocado and guacamole	Hass;Florida	NA	NA	NA	NA	NA	NA	Non-consumers	No avocado	NA	24hr diet recalls	24-hr Recalls	24-hr Recalls	Hass Avocado Board;National Institutes of Health	Hass Avocado Board;NIH	Commodity Boards;Research Institutes
37	34585653	https://doi.org/10.1017/S0007114521003913	Guan 2022	National Nutrition and Physical Activity Survey (NNPAS)	Main	Victor Fulgoni;Carol O'Neil;Theresa Nicklas	2022	British Journal of Nutrition	Consumption of avocado and associations with nutrient, food and anthropometric measures in a representative survey of Australians: A secondary analysis of the 2011-2012 National Nutrition and Physical Activity Survey	Avocados are a rich source of nutrients including monounsaturated fats, dietary fibre, potassium and Mg, as well as phytochemicals. However, no epidemiological analysis for the associations between avocado consumption and participant anthropometric measures has been conducted in Australia. The present study aimed to perform a secondary analysis of the 2011-2012 National Nutrition and Physical Act…	Australia		General population	Underweight		Balanced	AUSNUT 2011-2013 diet intake data, Health info NNPAS 2011-2012, distribution of male and female not specified for antropometirtc cohort	12153	12153	Observation	Survey	NNPAS (2011-2012), AUSNUT (2011-2013)	NA		0	Cross-sectional	All sources	Hass (assumed)	NA	NA	NA	NA	NA	NA	Non-consumers	No avocado	NA	2x 24 hour recalls (using the Automated Multiple-Pass Method)	24-hr Recalls	24-hr Recalls	Hass Avocado Board	Hass Avocado Board	Commodity Boards
39	NA	https://www.medigraphic.com/pdfs/medintmex/mim-2020/mim204e.pdf	Prado-Zavala 2020	Prado-Zavala 2020	Main	Luz Maria Prado-Zavala;Yolanda Campos-Perez;Fernanda Ayala-Aceves;Jaime Carranza-Madrigal	2020	Med Int Mex.	Avocado has better endothelial effects than other foods in apparently healthy young men	BACKGROUND: Endothelial dysfunction is the first step towards atherosclerosis. There are well-known risk factors such as diabetes, hypertension, dyslipidemia and smoking, and in recent times foods have also been recognized as modifiers of endothelial function. OBJECTIVE: To evaluate the effect on endothelium in healthy subjects of 4 types of food. MATERIAL AND METHOD: A clinical, experimental, co…	Mexico	Adult	General population	Healthy weight		Mostly male	Subjects had no medical history of cardiovascular risk factors, without overweight or obesity, without smoking and healthy after clinical review	16	16	Intervention	Crossover	Clinical trial	1	Acute	NA	Not specified	As directed/desired	Not specified	NA	Isocaloric	Not reported	Not reported	Controlled (acute meal)	Controlled	MUFA vs Sat Vegetable Fats vs Sat Animal Fats vs Simple Carbs	No avocado	Replacement	Unclear, likely consumed on-site	NA	NA (acute study)	Dr. Miguel Silva General Hospital	Dr. Miguel Silva General Hospital	Other
40	34960040	https://doi.org/10.3390/nu13124489	Segovia-Siapco 2021	Teen Food and Development Study	Main	Gina Segovia-Siapco;Michael Paalani;Keiji Oda;Peter Pribis;Joan SabatÃ©	2021	Nutrients	Associations between avocado consumption and diet quality, dietary intake, measures of obesity and body composition in adolescents: The Teen Food and Development Study	Avocado is a nutrient-rich food that has been shown to benefit the health and diet quality of adults. In this paper, we examined if habitual intake of avocado among adolescents is associated with their diet quality, food and nutrient intake, and measures of obesity and body composition. Participants aged 12â€“18 years old (n = 534) from selected public and Adventist middle-high schools reported t…	USA	Adolescent or younger	General population			Mostly female;Balanced		534	534	Observation	Cross-sectional	NA	NA		0	Cross-sectional	All sources	Not specified	NA	NA	NA	NA	NA	NA	Non-consumers	No avocado	NA	FFQ	FFQ	FFQ	Hass Avocado Board	Hass Avocado Board	Commodity Boards
42	35037373	https://doi.org/10.1111/jocd.14717	Henning 2022	NCT05102604	Main	Susanne M Henning;Jieping Yang;Shih Lung Woo;Ru-Po Lee;Jianjun Huang;Anna Rasmusen;Catherine L Carpenter;Gail Thames;Irene Gilbuena;Chi-Hong Tseng;David Heber;Zhaoping Li	2022	Journal of Cosmetic Dermatology	Avocado consumption increased skin elasticity and firmness in women - a pilot study	Background: Avocados are a rich dietary source of monounsaturated fatty acids, carotenoids, and phenolic compounds. Clinical studies have demonstrated that oral consumption of carotenoids improved skin aging. However, no studies have investigated whether oral intake of avocado will reduce skin aging. Objectives: We therefore performed this pilot study to assess whether oral consumption of one avo…	USA	Adult	General population	Overweight or obese		Mostly female	Exclusion criteria were the following: pregnant, use of skin- related prescription medication or supplements, or use of cosmetic agents with skin lightening/whiten - ing. Unstable medical condition such as on dialysis for renal disease, cardiac, gastrointestinal, or hepatic disease, cancer (non-melanoma skin cancer >5 years ago, any cancer site >10 years without recur- rence are acceptable), subj…	41	39	Intervention	Parallel-arm	Clinical trial	56	1-3 mo	NA	Not specified	As directed/desired	Hass	No intent	No intent	Not reported	Not reported	Ad libitum	Ad libitum	No avocado	No avocado	Addition	Daily logs for adherence to avo intake	Not measured	Not measured	Hass Avocado Board	Hass Avocado Board	Commodity Boards
43	8561655	https://pubmed.ncbi.nlm.nih.gov/8561655/	Carranza 1995	Carranza 1995	Main	J Carranza;M Alvizouri;M R Alvarado;F ChÃ¡vez;M GÃ³mez;J E Herrera	1995	Arch Inst Cardiol Mex ***needs spanish translated	Effects of avocado on the level of blood lipids in patients with phenotype II and IV dyslipidemias	To examine the effects of avocado on plasma lipid concentrations a two-diet trial involving 8 phenotype IV and 8 phenotype II dyslipidemia patients was carried out. A diet rich in monounsaturated fatty acids (DRCA) using the avocado as their major source (30% of the total calories were consumed as fat, 75% of the total fat from the avocado), with restriction of saturated fat and less of 300 mg of…	Mexico	Adult	Dyslipidemia	Overweight or obese	Elevated;Healthy	Mostly male;Mostly female	Subjects had different dyslipidemic phenotypes (II and IV)	16	16	Intervention	Crossover	Crossover;2x2;complete feeding	28	2-30 d	NA	Not specified	As directed/desired	Hass	Weight Maintenance	Isocaloric	No	No	Controlled	Controlled	Low saturated fat diet without avocado vs low saturated fat with avocado (increased MUFA); baseline	No avocado	Replacement	Consumed in DIGB dining room under strict staff supervision	Prescribed, not measured	Prescribed	Dr. Miguel Silva General Hospital	Dr. Miguel Silva General Hospital	Other
44	35352568	https://doi.org/10.1161/JAHA.121.024014	Pacheco 2022a	Nurses' Health Study (NHS 1986-2016);Health Professionals Follow-up Study (HPFS 1986-2016)	Main	Lorena S. Pacheco;Ryan D. Bradley;Julie O. Denenberg;Cheryl A. M. Anderson;Matthew A. Allison	2022	Journal of the American Heart Association	Avocado consumption and risk of cardiovascular disease in US adults	Background. Epidemiologic studies on the relationship between avocado intake and longâ€term cardiovascular disease (CVD) risk are lacking. Methods and Results. This study included 68Â 786 women from the NHS (Nursesâ€™ Health Study) and 41Â 701 men from the HPFS (Health Professionals Followâ€up Study; 1986â€“2016) who were free of cancer, coronary heart disease, and stroke at baseline. Diet was …	USA	Adult	General population	Overweight or obese;Healthy weight		Mostly female;Mostly male	Free of cancer, CVD, stroke	110487	110487	Observation	Cohort	Prospective (NHS, HPFS 1986-2016)	NA		30	15+ years	Not specified	Not specified	NA	NA	NA	NA	NA	NA	Non-consumers	No avocado	NA	FFQ	FFQ	FFQ	National Institutes of Health;National Institute of Diabetes and Digestive and Kidney Diseases;Harvard Chan Yerby Fellowship	NIH;NIDDK;Harvard Chan Yerby Fellowship	Research Institutes;Universities
46	35861827	https://doi.org/10.1161/JAHA.122.025657	Lichtenstein 2022	Habitual Diet and Avocado Trial	Main	Zhaoping Li;Angela Wong;Susanne M. Henning;Yanjun Zhang;Alexis Jones;Alona Zerlin;Gail Thames;Susan Bowerman;Chi-Hong Tseng;David Heber	2022	Journal of the American Heart Association	Effect of incorporating 1 avocado per day versus habitual diet on visceral adiposity: A randomized trial	Background Excess visceral adiposity is associated with increased risk of cardiometabolic disorders. Short-term well-controlled clinical trials suggest that regular avocado consumption favorably affects body weight, visceral adiposity, and satiety. Methods and Results The HAT Trial (Habitual Diet and Avocado Trial) was a multicenter, randomized, controlled parallel-arm trial designed to test whet…	USA	Adult	General population	Overweight or obese	Healthy;Elevated	Mostly female	Inclusion criteria were â‰¥25 years, waist circumference â‰¥35 inches for women and â‰¥40 inches for men, and regular consumption of â‰¤2 avocados per month. Exclusion criteria were aversion to avocados, known avocado sensitivity, and unwillingness to undergo MRI scans.	1008	923	Intervention	Parallel-arm	Randomized controlled trial	182	3-6 mo	NA	Not specified	As directed/desired	Hass	No intent	No intent	No	No	Ad libitum	Ad libitum	Habitual diet (no avocado)	No avocado	Addition	24hr recalls	24-hr Recalls	24-hr Recalls	Hass Avocado Board	Hass Avocado Board	Commodity Boards
47	35700149	https://doi.org/10.1093/jn/nxac126	Zhang 2022	NCT02695433	Main	Xuhuiqun Zhang;Di Xiao;Gabriela Guzman;Indika Edirisinghe;Britt Burton-Freeman	2022	The Journal of Nutrition	Avocado consumption for 12 weeks and cardio-metabolic risk factors: A randomized controlled trial in adults with overweight or obesity and insulin resistance	Background:Â Diets emphasizing unsaturated fat and high fiber are associated with reducing cardio-metabolic risk factors. Avocados are rich in mono- and poly-unsaturated fats and fiber. Objective:Â Assess replacement of carbohydrate energy with avocado energy for 12 weeks on glucose homeostasis and cardio-metabolic risk factors in self-selecting free-living adults with overweight or obesity and i…	USA	Adult	T2D/Insulin resistance	Overweight or obese	Elevated;Healthy	Balanced	Individuals who smoked or used medications that would interfere with outcomes of the study (i.e., oral and injectable hypoglycemic medications, lipid-lowering medications, insulin-sensitizing medications), had allergies/intolerances to foods consumed in the study, consumed â‰¥3 avocados per week, consumed â‰¥3 servings of nuts per week, or had clinical evidence/history of diabetes or cardiovascul…	124	93	Intervention	Parallel-arm	Randomized controlled trial	84	1-3 mo	NA	Not specified	As directed/desired	Hass	No intent	Isocaloric	No	No	Ad libitum	Ad libitum	No avocado (control- high carb low fat food)	No avocado	Replacement	Automated Self-Administered 24-hh Dietary Assessment Tool	24-hr Recalls	24-hr Recalls	Hass Avocado Board	Hass Avocado Board	Commodity Boards
48	35807924	https://doi.org/10.3390/nu14132744	Pacheco 2022b	Effects of Avocado Intake on the Nutritional Status of Families Trial	Unique	Lorena S. Pacheco;Ryan D. Bradley;Cheryl A. M. Anderson;Matthew A. Allison	2022	Nutrients	Changes in Biomarkers of Non-Alcoholic Fatty Liver Disease (NAFLD) upon Access to Avocados in Hispanic/Latino Adults: Secondary Data Analysis of a Cluster Randomized Controlled Trial	Non-alcoholic fatty liver disease (NAFLD) is a public health concern and Hispanic/Latinos are disproportionately affected. There is evidence for favorable effects of dietary intake of monounsaturated fatty acids (MUFA) on NAFLD, yet studies examining avocados as a source of MUFA on hepatic function have not been assessed. We investigated the effects of low (3) vs. high (14) avocado allotment on b…	USA	Adult	General population	Overweight or obese		Mostly female	Subjects are head of the household only	72	66	Intervention	Parallel-arm	Cluster, family-based	180	3-6 mo	NA	Not specified	As directed/desired	Hass	No intent	No intent	No (unintentional)	No	Ad libitum	Ad libitum	Low vs higher avo intake	Low avocado	Addition	Self-reported FFQ	FFQ	FFQ	Hass Avocado Board;Scientific Councils of the American Heart Association;Student Scholarship in Cardiovascular Disease;National Heart, Lung, and Blood Institute;National Institute of Diabetes and Digestive and Kidney Diseases;Harvard Chan Perby Fellowhsip	Hass Avocado Board;Scientific Councils of the American Heart Association;Student Scholarship in Cardiovascular Disease;NHLBI;NIDDK;Harvard Chan Yerby Fellowship	Commodity Boards;Research Institutes;Universities
49	35979778	https://doi.org/10.1017/S0007114522002690	Monge 2023	Mexican Teachers' Cohort	Main	Xuanxia Mao;Cheng Chen;Pengcheng Xun;Martha L Daviglus;Lyn M Steffen;David R Jacobs;Linda VanÂ Horn;Stephen Sidney;Na Zhu;Bo Qin;Ka He	2023	British Journal of Nutrition	Avocado consumption is associated with a reduction in hypertension incidence in Mexican women	Avocado is a fruit rich in dietary fibre, potassium, Mg, mono and PUFA and bioactive phytochemicals, which are nutritional components that have been associated with cardiovascular health. Yet, despite the boom in avocado consumption, we lack evidence on its association with CVD risk in the general population. To estimate the prospective association between avocado consumption and incident hyperte…	Mexico	Adult	General population	Overweight or obese		Mostly female	Mexican women;Free of hypertension, CVD, and cancer	115312	67383	Observation	Cohort	Prospective (MTC, first cycle 2011-2013)	NA		7	7-15 years	Not specified	Not specified	NA	NA	NA	NA	NA	NA	Non- or low-consumers	Dose-response	NA	4x 4-d 24-h FFQ	FFQ	FFQ	American Institute for Cancer;Consejo Nacional de Ciencia y TecnologÃ­a (CONACyT)	American Institute for Cancer;Consejo Nacional de Ciencia y TecnologÃ­a (CONACyT)	Research Institutes
50	37798236	https://doi.org/10.1016/j.numecd.2023.08.002	Senn 2023	Hispanic Community Health Study/Study of Latinos (HCHS/SOL)	Main	MacKenzie K. Senn;Mark O. Goodarzi;Gautam Ramesh;Matthew A. Allison;Mariaelisa Graff;Kristin L. Young;Gregory A. Talavera;Amanda C. McClain;Tanya P. Garcia;Jerome I. Rotter;Alexis C. Wood	2023	Nutrition, Metabolism and Cardiovascular Diseases	Associations Between Avocado Intake and Measures of Glucose and Insulin Homeostasis in Hispanic Individuals With and Without Type 2 Diabetes: Results from the Hispanic Community Health Study / Study of Latinos (HCHS/SOL)	Background and Aims To investigate associations between avocado intake and glycemia in Hispanic/Latino adults. Methods and Results The associations of avocado intake with measures of glycemia were evaluated in a cross-sectional analysis of up to 14,591 Hispanic/Latino adults. Glycemia was assessed via: average glucose levels (hemoglobin A1c; HbA1c), fasting glucose and insulin, glucose and insuli…	USA	Adult	T2D/Insulin resistance	Overweight or obese		Mostly female	All participants are Hispanic	11996	11996	Observation	Cross-sectional	NA	NA		0	Cross-sectional	Not specified	Not specified	NA	NA	NA	NA	NA	NA	Non-consumers	Dose-response	NA	Two 24-hr Recalls	24-hr Recalls	24-hr Recalls	National Heart, Lung, and Blood Institute	NHLBI	Research Institutes
51	37562669	https://doi.org/10.1016/j.tjnut.2023.07.013	Wood 2023	Multi-Ethnic Study of Atherosclerosis (MESA)	Main	Alexis C. Wood;Mark O. Goodarzi;Mackenzie K. Senn;Meghana D. Gadgil;Goncalo Graca;Matthew A. Allison;Ioanna Tzoulaki;Michael Y. Mi;Philip Greenland;Timothy Ebbels;Paul Elliott;Russell P. Tracy;David M. Herrington;Jerome I. Rotter	2023	The Journal of Nutrition	Associations between Metabolomic Biomarkers of Avocado Intake and Glycemia in the Multi-Ethnic Study of Atherosclerosis	Background Avocado consumption is linked to better glucose homeostasis, but small associations suggest potential population heterogeneity. Metabolomic data capture the effects of food intake after digestion and metabolism, thus accounting for individual differences in these processes. Objectives To identify metabolomic biomarkers of avocado intake and to examine their associations with glycemia. …	USA	Adult	General population	Overweight or obese		Balanced		6220	6220	Observation	Cohort	NA	NA		18	15+ years	Not specified	Not specified	NA	NA	NA	NA	NA	NA	Nonconsumers	No avocado	NA	MESA FFQ, a modified version of the Insulin Resistance Atherosclerosis Family Study FFQ	FFQ	FFQ	Hass Avocado Board;National Heart, Lung, and Blood Institute	Hass Avocado Board;NHLBI	Commodity Boards;Research Institutes
52	36490225	https://doi.org/10.1158/1940-6207.capr-22-0298	Ericsson 2022	Nurses' Health Study (NHS 1986-2014);Health Professionals Follow-up Study (HPFS 1986-2016)	Unique	Caroline I Ericsson;Lorena S Pacheco;Andrea Romanos-Nanclares;Ethan Ecsedy;Edward L Giovannucci;A Heather Eliassen;Lorelei A Mucci;Benjamin C Fu	2022	Cancer Prevention Research	Prospective Study of Avocado Consumption and Cancer Risk in U.S. Men and Women	Abstract Avocados contain nutrients and phytochemicals that make it promising for cancer prevention, and chemopreventive properties have been demonstrated in prior studies. Prospective studies on avocado consumption and cancer risk have yet to be conducted. This study included data from 45,289 men in the Health Professionals Follow-Up Study (HPFS, 1986â€“2016) and 67,039 women in the Nursesâ€™ He…	USA	Adult;Senior	General population	Overweight or obese;Healthy weight		Mostly female;Mostly male		112328	112328	Observation	Cohort	Prospective (NHS 1986-2014, HPFS 1986-2016)	NA		30	15+ years	Not specified	Not specified	NA	NA	NA	NA	NA	NA	<1 serving/months	Low avocado	NA	FFQ	FFQ	FFQ	NIH grant;National Institute of Diabetes and Digestive Kidney Diseases grant	NIH;NIDDK	Research Institutes
53	NA	https://doi.org/10.24245/mim.v34i6.2117	Raya-Farias 2018	Raya-Farias 2018	Main	Andres Raya-Farias;Jaime Carranza-Madrigal;Yolanda Campos-Perez;Christian Cortes-Rojo;Tania Alina Sanchez-Perez	2018	Medicina Interna de Mexico	Avocado inhibits oxidative stress and endothelial dysfunction induced by the intake of a hamburger in patients with metabolic syndrome	OBJECTIVE: To determinate if the ingestion of avocado in patients with metabolic syndrome diminishes endothelial dysfunction, oxidative stress and inflammation after ingesting hamburger meat. MATERIAL AND METHOD: An experimental, longitudinal, randomized, prospective, crossed, open but blinded for outcomes evaluators trial was done from June to August 2018 in patients with metabolic syndrome in a…	Mexico	Adult	Metabolic syndrome		Elevated	Mostly male	Experimental, longitudinal, randomized, prospective, crossed, open but blinded. Not actually a longitudinal study though.	14	14	Intervention	Crossover	NA	1	Acute	NA	Not specified	As directed/desired	Hass	NA	Hypercaloric	No	No	Controlled (acute meal)	Controlled	Hamburger with and without avocado	No avocado	Addition	Not specified	NA	NA (acute study)	Not specified	Not specified	Not specified
54	37344091	https://doi.org/10.1016/j.clnesp.2023.04.020	VanEvery 2023	Effects of Avocado Intake on the Nutritional Status of Families Trial	Unique	Hannah VanEvery;Lorena S. Pacheco;Elizabeth Sun;Matthew A. Allison;Xiang Gao	2023	Clinical Nutrition ESPEN	The impact of avocado intake on anthropometric measures among Hispanic/Latino children and adolescents: A cluster randomized controlled trial	Background/Objective While the association between avocado consumption and low metabolic risk has been shown in some studies conducted in adults, little is known about the potential effects of avocado consumption on health outcomes in children and adolescents. Thus, we investigated the impact of two levels of avocado allotment, plus a standard nutrition education, on measures of adiposity in chil…	USA	Adolescent or younger	General population	Underweight;Overweight or obese;Healthy weight		Mostly female;Balanced		90	NA	Intervention	Parallel-arm	Cluster, family-based	180	3-6 mo	NA	Not specified	As directed/desired	Hass	No intent	No intent	No (unintentional)	No	Ad libitum	Ad libitum	Low vs higher avo intake	Low avocado	Addition	Self-reported FFQ	FFQ	FFQ	Hass Avocado Board;National Heart, Lung, and Blood Institute;National Institute of Diabetes and Digestive and Kidney Diseases	Hass Avocado Board;NHLBI;NIDDK	Commodity Boards;Research Institutes
56	NA	https://www.researchgate.net/publication/286699948_Lower_quantities_of_avocado_as_daily_source_of_monounsaturated_fats_Effect_on_serum_and_membrane_lipids_endothelial_function_platelet_aggregation_and_C-reactive_protein_in_patients_with_metabolic_synd	Carranza 2004	Carranza 2004	Main	Jaime Carranza;Mario Alvizouri-Munoz;A Rodriguez-Barron;Y Campos;A Herrera;JM Herrera;VF Nieto	2004	Medicina Interna de MÃ©xico	Lower quantities of avocado as daily source of monounsaturated fats: effect on serum and membrane lipids, endothelial function, platelet aggregation and C-reactive protein in patients with metabolic syndrome	Background: Avocado, as a monounsaturated fatty acids source, has demonstrated a beneficial effect on the serum lipid profile. The previously administered amounts of avocado have been large and that makes difficult the long term adherence to the dietetic treatment. Objective: To determine the effects of two smaller amounts of avocado Hass than previously studied on the serum and cell membrane lip…	Mexico		Metabolic syndrome	Overweight or obese	Elevated;Healthy	Balanced	Prospective, randomized, open, blind, crossover	20	20	Intervention	Crossover	NA	28	2-30 d	NA	Not specified	As directed/desired	Hass	No intent	Isocaloric	Not reported	Not reported	Ad libitum	Ad libitum	0, 1, or 2 g avo/kg BW. Avo replaced margarine, ham, and swap of whole milk with skim milk.	Dose-response	Replacement	None	Not measured	Not measured	Dr. Miguel Silva General Hospital	Dr. Miguel Silva General Hospital	Other
57	34836276	https://doi.org/10.3390/nu13114021	Pacheco 2021	Effects of Avocado Intake on the Nutritional Status of Families Trial	Main	Lorena S. Pacheco;Yanping Li;Eric B. Rimm;JoAnn E. Manson;Qi Sun;Kathryn Rexrode;Frank B. Hu;Marta Guaschâ€FerrÃ©	2021	Nutrients	Effects of Different Allotments of Avocados on the Nutritional Status of Families: A Cluster Randomized Controlled Trial	Avocados are a nutrient-dense plant-food, but limited trial-derived evidence exists about the effects of avocado intake on family nutritional status. We investigated the impact of two levels of avocado allotment, plus a standard nutrition education intervention on the nutritional status of Hispanic/Latino families. Seventy-two families consisting of at least three members of â‰¥5 years of age and…	USA	Adolescent or younger;Adult	General population	Underweight;Overweight or obese	Elevated;Healthy	Mostly female;Balanced;Mostly male		231	198	Intervention	Parallel-arm	Cluster, family-based	180	3-6 mo	NA	Not specified	As directed/desired	Hass	No intent	No intent	No (unintentional)	No	Ad libitum	Ad libitum	Low vs higher avo intake	Low avocado	Addition	Self-reported FFQ	FFQ	FFQ	Hass Avocado Board;National Heart, Lung, and Blood Institute;National Institute of Diabetes and Digestive and Kidney Diseases	Hass Avocado Board;NHLBI;NIDDK	Commodity Boards;Research Institutes
60	36947255	https://doi.org/10.1007/s00394-023-03134-8	Cheng 2023	Multi-Ethnic Study of Atherosclerosis (MESA)	Unique	Feon W. Cheng;Nikki A. Ford;Alexis C. Wood;Russell Tracy	2023	European Journal of Nutrition	Avocado consumption and markers of inflammation: results from the Multi-Ethnic Study of Atherosclerosis (MESA)	Since avocado consumption has been linked to a possible reduction in inflammation, we investigated associations between avocado consumption and markers of inflammation in a population-based multi-ethnic cohort [Multi-Ethnic Study of Atherosclerosis (MESA)]. We used a food frequency questionnaire (FFQ) at MESA exam 1 to capture avocado/guacamole consumption. To calculate daily servings of avocado/…	USA	Adult	General population	Overweight or obese		Balanced		5794	5794	Observation	Cross-sectional	NA	NA		0	Cross-sectional	Avocado and guacamole	Not specified	NA	NA	NA	NA	NA	NA	Non- or low-consumers	Dose-response	NA	MESA FFQ, a modified version of the Insulin Resistance Atherosclerosis Family Study FFQ	FFQ	FFQ	Avocado Nutrition Center;National Heart, Lung, and Blood Institute;NCATS	Hass Avocado Board;NHLBI;National Center for Advancing Translational Sciences	Commodity Boards;Research Institutes
61	31367691	https://doi.org/10.1093/cdn/nzz068	Henning 2019	NCT02953158	Main	Bridget A Hannon;Caitlyn G Edwards;Sharon V Thompson;Ginger E Reeser;Nicholas A Burd;Hannah D Holscher;Margarita Teran-Garcia;Naiman A Khan	2019	Current Developments in Nutrition	Hass Avocado Inclusion in a Weight-Loss Diet Supported Weight Loss and Altered Gut Microbiota: A 12-Week Randomized, Parallel-Controlled Trial	Background Avocados contain fiber, lutein, and vitamin E, and they are a rich source of MUFAs. The effect of including an avocado daily as part of a hypocaloric weight-loss diet on weight loss is not known. Objective The aim of this study was to determine the effect of daily avocado consumption as part of a hypocaloric diet on weight loss, body composition, satiety, biomarkers of inflammation, an…	USA	Adult	General population	Underweight;Overweight or obese	Elevated;Healthy	Mostly female	BMI 27-35, no prescription meds for weight loss, without weight change of >5 pounds in the previous 3 mo	63	51	Intervention	Parallel-arm	Prospective, randomized, parallel-controlled, 2-arm, open-label, intervention trial	84	1-3 mo	NA	Not specified	As directed/desired	Hass	Weight loss	Isocaloric	Yes	Yes	Partial ad lib	Controlled	Avo vs no Avo, both are 30-35% fat, 15-20% PRO, 45-55% carb	No avocado	Replacement	Participants provided with a meal plan and coached to select specific items, actual intake not measured.	Prescribed, not measured	Prescribed	Hass Avocado Board	Hass Avocado Board	Commodity Boards
62	NA	https://www.medigraphic.com/cgi-bin/new/resumenI.cgi?IDARTICULO=19634	Carranza-Madrigal 2008	Carranza-Madrigal 2008	Main	Jaime Carranza-Madrigal;Mario Alvizouri-Munoz;Jorge E Herrera Abarca;Fortino Chavez Carbajal	2008	Medicina Interna de MÃ©xico	Avocado as source of monounsaturated fatty acid: its effects in serum lipids, glucose metabolism and rheology in patients with type 2 diabetes	Background: Avocado as a source of monounsaturated acid fat has beneficial effects on lipid profile and endothelial function in diabetic and metabolic syndrome patients, and may reduce insulin sensitivity and risk of atherothrombotic events. Objective: To determine avocado's effect on lipids, glucose metabolism, and rheologic parameters in patients with type 2 diabetes. Patients and method: 21 pa…	Mexico	Adult	T2D/Insulin resistance	Overweight or obese	Elevated;Healthy	Balanced	NA	21	21	Intervention	Crossover	Randomized, open, blind, crossover	28	2-30 d	NA	Not specified	As directed/desired	Hass	Weight Loss	Isocaloric	Yes	Yes	Controlled	Controlled	Same fat diet without avocado	No avocado	Replacement	Meals provided and consumed on site	Prescribed, not measured	Prescribed	Board of Trustees for Medical Research and Education;National Council of Science and Technology	Board of Trustees for Medical Research and Education;National Council of Science and Technology	Research Institutes
67	NA	https://ve.scielo.org/scielo.php?script=sci_abstract&pid=S0798-07522009000200005&lng=en&nrm=iso&tlng=en	Anderson-Vazquez 2009	Anderson-Vazquez 2009	Main	H.E. Anderson-Vazquez;C. Soralys;L. Rosa;G.I.L. Coromoto	2009	Anales Venezolanos de Nutricion	Effect of consumption of avocado (Persea Americana Mill) on the lipid profile in adults with dyslipidemia	Dyslipidemia are common metabolic disorder, which constitute a major risk factor for diseases which have the anatomic substrate atherosclerosis. The aim of this study was to determine the effect of the avocado on the plasma levels of lipids in subjects with dyslipidemia. The sample was formed with 14 men: 6 (control group) (GA) and 8 (experimental group) (GB). Anthropometrically Both groups were …	Venezuela	Adult	Dyslipidemia	Overweight or obese	Elevated	Mostly male	Experimental, prospective, longitudinal	14	14	Intervention	Parallel-arm	NA	30	2-30 d	NA	Not specified	As directed/desired	Not specified	Weight loss	Isocaloric	Yes	Yes	Controlled	Controlled	Avo vs corn oil	No avocado	Replacement	Daily food records, dietary history, freqyuency of food consumption	Prescribed, measured not reported	Prescribed	Not specified	Not specified	Not specified
70	17640158	https://doi.org/01635580701327935	Monroe 2007	Multiethnic Cohort Study (MEC)	Main	Adriana Monge;Dalia Stern;Adrian CortÃ©s-Valencia;AndrÃ©s CatzÃ­n-Kuhlmann;MartÃ­n Lajous;Edgar Denova-GutiÃ©rrez	2007	Nutrition and Cancer	Dietary fiber intake and endogenous serum hormone levels in naturally postmenopausal Mexican American women: the Multiethnic Cohort Study	This study investigated dietary fiber intake in association with serum estrogen levels in naturally postmenopausal Latina women with a wide range of fiber intake. Estrone (E1), estradiol (E2), and sex-hormone-binding globulin (SHBG) were measured in 242 women. Associations between estrogen levels and intake of dietary fiber, including insoluble and soluble fractions, quantified from a food freque…	USA	Adult	General population	Overweight or obese		Mostly female	Post-menopausal women	295	242	Observation	Cross-sectional	NA	NA		0	Cross-sectional	Not specified	Not specified	NA	NA	NA	NA	NA	NA	Non- or low-consumers	Dose-response	NA	FFQ	FFQ	FFQ	California Breast Cancer Research Program;National Cancer Institute	California Breast Cancer Research Program;National Cancer Institute	Research Institutes
72	3593665	https://doi.org/10.1079/BJN19870041	Ballot 1987	Ballot 1987	Main	D. Ballot;R. D. Baynes;T. H. Bothwell;M. Gillooly;J. Macfarlane;A. P. Macphail;G. Lyons;D. P. Derman;W. R. Bezwoda;J. D. Torrance;J. E. Bothwell	1987	British Journal of Nutrition	The effects of fruit juices and fruits on the absorption of iron from a rice meal	1. The effects of the chemical composition of fruit juices and fruit on the absorption of iron from a rice (Oryza sativa) meal were measured in 234 parous Indian women, using the erythrocyte utilization of radioactive Fe method. 2. The corrected geometric mean Fe absorptions with different juices varied between 0.040 and 0.129, with the variation correlating closely with the ascorbic acid content…	South Africa	Adult	General population			Mostly female	NA	234	234	Intervention	Parallel-arm	NA	2	2-30 d	NA	Not specified	As directed/desired	Not specified	No intent	No intent	No	No	Controlled	Controlled	Various fruit and fruit juices, or rice w/o avocado	No avocado	Addition	Prescribed	NA	NA (acute study)	Not specified	Not specified	Not specified
73	37399169	https://doi.org/10.1371/journal.pntd.0011439	Kim 2023	MANE project	Main	Amanda Khor;Ross Grant;Chin Tung;Jade Guest;Belinda Pope;Margaret Morris;Ayse Bilgin	2023	PLOS Neglected Tropical Diseases	The impact of dual- versus single-dosing and fatty food co-administration on albendazole efficacy against hookworm among children in Mayuge district, Uganda: Results from a 2x2 factorial randomised controlled trial	Mass Drug Administration (MDA) is the main strategy for control of soil-transmitted helminth (STH) infections, with single-dose benzimidazole (albendazole or mebendazole) the principal MDA option. In Mayuge district, Uganda, an MDA programme has been in place for over fifteen years but hookworm infection remains common and there is concern that the effectiveness of single-dose albendazole as curr…	Uganda	Adolescent or younger	Hookworm			Balanced	NA	225	222	Intervention	Parallel-arm	2x2 factorial	21	2-30 d	NA	Not specified	As directed/desired	Not specified	No intent	No intent	Not reported	Not reported	Ad libitum	Ad libitum	No avocado	No avocado	Addition	None	Not measured	Not measured	Korean International Cooperation Agency	Korean International Cooperation Agency	Research Institutes
75	21984307	https://doi.org/10.1007/s10552-011-9850-4	Jackson 2012	Jackson 2012	Main	Celine Heskey;Keiji Oda;Joan SabatÃ©	2012	Cancer Causes & Control	Associations of whole-blood fatty acids and dietary intakes with prostate cancer in Jamaica	To investigate the association of whole-blood fatty acids and reported intakes of fats with risk of prostate cancer (PCa). Caseâ€“control study of 209 men 40â€“80 years old with newly diagnosed, histologically confirmed prostate cancer and 226 cancer-free men attending the same urology clinics. Whole-blood fatty acid composition (mol%) was measured by gas chromatography and diet assessed by food …	Jamaica	Adult;Senior	Prostate cancer	Overweight or obese		Mostly male	NA	516	435	Observation	Case-control	NA	NA		0	Cross-sectional	Not specified	Not specified	NA	NA	NA	NA	NA	NA	Controals and cases with prostate cancer	Dose-response	NA	FFQ	FFQ	FFQ	National Health Fund;Planning Institute of Jamaica;University of the West Indies	National Health Fund;Planning Institute of Jamaica;University of the West Indies	Research Institutes;Universities
76	37941823	https://doi.org/10.1016/j.focus.2023.100145	Allen 2023	Effects of Avocado Intake on the Nutritional Status of Families Trial	Not Unique	Tara Shrout Allen;Aubrey L. Doede;Colin M.B. King;Lorena S. Pacheco;Gregory A. Talavera;Julie O. Denenberg;Amelia S. Eastman;Michael H. Criqui;Matthew A. Allison	2023	AJPM Focus	Nutritional Avocado Intervention Improves Physical Activity Measures in Hispanic/Latino Families: A Cluster RCT	Introduction Nutrition and physical activity are key components for the prevention of cardiovascular disease. There remains a paucity of trial data on the effect of specific nutritional interventions on physical activity and sedentary time. One question is how a common nutrient-dense food such as avocado may impact physical activity and sedentary time in Hispanic/Latino families, a group that rep…	USA	Adolescent or younger;Adult	General population	Overweight or obese		Balanced;Mostly female	NA	235	198	Intervention	Parallel-arm	Cluster, family-based	180	3-6 mo	NA	Not specified	As directed/desired	Hass	No intent	No intent	No (unintentional)	No	Ad libitum	Ad libitum	Low vs higher avo intake	Low avocado	Addition	Self-reported FFQ	FFQ	FFQ	National Heart, Lung, and Blood Institute;Hass Avocado Board	NHLBI;Hass Avocado Board	Research Institutes;Commodity Boards
77	26644239	https://doi.org/10.1161/HYPERTENSIONAHA.115.06497	Borgi 2016	Nurses' Health Study (NHS 1986-2014);Health Professionals Follow-up Study (HPFS 1986-2010);Nurses' Health Study II (NHSII 1991-2011)	Main	Lea Borgi;Isao Muraki;Ambika Satija;Walter C. Willett;Eric B. Rimm;John P. Forman	2016	Hypertension	Fruit and Vegetable Consumption and the Incidence of Hypertension in Three Prospective Cohort Studies	Increased fruit and vegetable intake lowers blood pressure in short-term interventional studies. However, data on the association of long-term intake of fruits and vegetables with hypertension risk are scarce. We prospectively examined the independent association of whole fruit (excluding juices) and vegetable intake, as well as the change in consumption of whole fruits and vegetables, with incid…	USA	Adult	General population	Healthy weight;Overweight or obese		Mostly female;Mostly male	Omitted subjects with hypertension at baseline. Otherwise gen pop (even though targeting working adults in health profession)	187453	187453	Observation	Cohort	Prospective	NA		26	15+ years	Not specified	Not specified	NA	NA	NA	NA	NA	NA	<1 serving/months	Low avocado	NA	FFQ	FFQ	FFQ	NIH grants;American Heart Assocation	NIH;American Heart Assocation	Research Institutes
78	38425005	https://doi.org/10.1080/01635581.2024.2320950	Cheng 2024a	Multiethnic Cohort Study (MEC)	Unique	Feon W. Cheng;Song-Yi Park;Christopher A. Haiman;Lynne R. Wilkens;LoÃ¯c Le Marchand;Nikki A. Ford	2024	Nutrition and Cancer	Avocado and Guacamole Consumption and Colorectal Cancer Risk: The Multiethnic Cohort Study	Dietary fiber and phytonutrients can protect against colorectal cancer, yet their consumption is low in the US. Avocados are a potential source of these beneficial nutrients. Therefore, this study aimed to examine the relationship between avocados/guacamole consumption and colorectal cancer risk in the Multiethnic Cohort Study. We assessed avocados/guacamole consumption by using a food frequency …	USA	Adult	General population			Balanced	NA	192651	192651	Observation	Cohort	NA	NA		26	15+ years	Avocado and guacamole	Not specified	NA	NA	NA	NA	NA	NA	low mid high consumers	Dose-response	NA	FFQ	FFQ	FFQ	National Cancer Institute	National Cancer Institute	Research Institutes
79	38375072	https://doi.org/10.1016/j.cdnut.2024.102079	Petersen 2024	Habitual Diet and Avocado Trial	Not unique	Kristina S Petersen;Sydney Smith;Alice H Lichtenstein;Nirupa R Matthan;Zhaoping Li;Joan Sabate;Sujatha Rajaram;Gina Segovia-Siapco;David M Reboussin;Penny M Kris-Etherton	2024	Current Developments in Nutrition	One Avocado per Day as Part of Usual Intake Improves Diet Quality: Exploratory Results from a Randomized Controlled Trial	Background Few clinical trials have evaluated diet quality change as a predictor of intervention effectiveness. Objectives The aim of this study was to examine changes in the Healthy Eating Index (HEI)-2015 after a food-based intervention, and assess the associations between HEI-2015 change and intervention effects on cardiometabolic riskâ€“related outcomes. Methods The Habitual Diet and Avocado …	USA	Adult	General population	Underweight;Overweight or obese	Healthy;Elevated	Mostly female		1008	952	Intervention	Parallel-arm	Randomized controlled trial	182	3-6 mo	NA	Not specified	As directed/desired	Hass	No intent	No intent	No	No	Ad libitum	Ad libitum	Habitual diet (no avocado)	No avocado	Addition	24hr recalls	24-hr Recalls	24-hr Recalls	Hass Avocado Board	Hass Avocado Board	Commodity Boards
80	38273346	https://doi.org/10.1186/s12937-024-00915-7	Probst 2024	Australia Health Survey (AHS 2011-2013);National Health Survey (NHS);National Health Measures Survey (NHMS);National Nutrition and Physical Activity Survey (NNPAS)	Main	Yasmine Probst;Vivienne Guan;Elizabeth Neale	2024	Nutrition Journal	Avocado intake and cardiometabolic risk factors in a representative survey of Australians: a secondary analysis of the 2011â€“2012 national nutrition and physical activity survey	Avocados are a rich source of nutrients including monounsaturated fats, dietary fibre and phytochemicals. Higher dietary quality is reported in studies of consumers with higher avocado intakes. The present study aimed to examine avocado consumption and cardiometabolic risk measures in a representative sample of Australian adults. A cross-sectional analysis was performed using Australian Health Su…	Australia	Adult	General population	Overweight or obese	Healthy;Elevated	Balanced;Mostly female	National Health Survey, National Health Measures Survey, National Nutrition and Physical Activty Survey	2736	2736	Observation	Survey	NA	NA		0	Cross-sectional	All sources	Not specified	NA	NA	NA	NA	NA	NA	Non-consumers and low vs high	Low avocado;No avocado	NA	1 24-hr recall	24-hr Recalls	24-hr Recalls	Avocado Nutrition Center	Hass Avocado Board	Commodity Boards
81	38354278	https://doi.org/10.1089/jmf.2023.0203	Carris 2024	Multi-Ethnic Study of Atherosclerosis (MESA)	Unique	Nicholas W. Carris;Rahul Mhaskar;Emily Coughlin;Easton Bracey;Srinivas M. Tipparaju;Koushik R. Reddy;Hariom Yadav;Ganesh V. Halade	2024	Journal of Medicinal Food	Association of Common Foods with Inflammation and Mortality: Analysis from a Large Prospective Cohort Study	Some dietary patterns are associated with inflammation, while others lower inflammation and improve health. However, many people cannot follow a complete, healthy diet. Therefore, this study's aim was to identify specific foods associated chronic inflammation and mortality. The study used Multi-Ethnic Study of Atherosclerosis (MESA) research materials from the NHLBI Biologic Specimen and Data Rep…	USA	Adult	General population	Overweight or obese		Balanced		6814	6814	Observation	Cohort	NA	NA		15	7-15 years	Avocado and guacamole	Not specified	NA	NA	NA	NA	NA	NA	Non- or low-consumers	Dose-response	NA	MESA FFQ, a modified version of the Insulin Resistance Atherosclerosis Family Study FFQ	FFQ	FFQ	National Institute of Health;William Saunders Geriatric Pharmacotherapy Endowment	NIH;William Saunders Geriatric Pharmacotherapy Endowment	Research Institutes
83	37971096	https://www.scielo.br/j/csp/a/RLMYgPGPLP3S4qMsBbQDtLf/?lang=en	Morales 2023	Morales 2023	Main	Kristine R. Monroe;Suzanne P. Murphy;Brian E. Henderson;Laurence N. Kolonel;Frank Z. Stanczyk;Herman Adlercreutz;Malcolm C. Pike	2023	Cadernos de SaÃºde PÃºblica	Adherence to the Mediterranean diet and depression, anxiety, and stress symptoms in Chilean university students: a cross-sectional study	This study aims to determine the association of adherence to the Mediterranean diet and its food groups with depressive symptoms in Chilean university students. The study design was cross-sectional. A total of 934 first-year students at a Chilean public university completed a self-report questionnaire. To assess adherence to Mediterranean diet, an index validated in Chile (Chilean-MDI) was used, …	Chile	Adult	General population			Balanced		934	934	Observation	Cross-sectional	NA	NA		0	Cross-sectional	Not specified	Not specified	NA	NA	NA	NA	NA	NA	low mid high consumers	Dose-response	NA	Chilean mediterranean diet index, self-reported online targeting frequency of intake of 14 food groups.	FFQ	FFQ	La Frontera University	La Frontera University	Universities

## Sheet: Outcome Level
Index	Citation	Study type	Primary Report	Source	Group ID	Sub-group 1	Analytical Population	Comparison	Measure Domain	Measure Subdomain	Measure, Binned	Measure, Cleaned	Measure, Reported	Sample Type	Time	Time Unit	Time, weeks	n	Statistic	Unit	Value	SE	SD	Lower	Upper	Range Type	UNIT CONVERTED	Value CONVERTED	Value CONVERTED (bin)	Value CONVERTED (bin 5)	Value CONVERTED (bin 10)	SE CONVERTED	SD CONVERTED	LOWER CONVERTED	UPPER CONVERTED	Conversion Method
1	Wang 2020	Intervention	NCT01235832	Methods section	Avocado diet	NA	Planned	Summary	Dietary	Avocado intake	Avocado intake	Avocado intake	Avocado intake	NA		NA		43	Average	g/d	136					NA	g/d	136	136	135	130					NA
1	Wang 2020	Intervention	NCT01235832	Methods section	Baseline Average American Diet	NA	Planned	Summary	Dietary	Avocado intake	Avocado intake	Avocado intake	Avocado intake	NA		NA		45	Average	g/d	0					NA	g/d	0	0	0	0					NA
1	Wang 2020	Intervention	NCT01235832	Methods section	Lower-fat diet	NA	Planned	Summary	Dietary	Avocado intake	Avocado intake	Avocado intake	Avocado intake	NA		NA		43	Average	g/d	0					NA	g/d	0	0	0	0					NA
1	Wang 2020	Intervention	NCT01235832	Methods section	Moderate-fat diet	NA	Planned	Summary	Dietary	Avocado intake	Avocado intake	Avocado intake	Avocado intake	NA		NA		42	Average	g/d	0					NA	g/d	0	0	0	0					NA
1	Wang 2020	Intervention	NCT01235832	Methods section Wang 2015	Baseline Average American Diet	NA	ITT	Summary	Subject Characteristics	Age	Age	Age	Age	NA		NA		45	Mean	Years	45	1.98	13.3	21	70	min,max	years	45	45	45	40	1.98265	13.3	21	70	NA
1	Wang 2020	Intervention	NCT01235832	Methods section Wang 2015	Baseline Average American Diet	NA	ITT	Summary	Subject Characteristics	Anthropometry	BMI	BMI	BMI	NA		NA		45	Mean	kg/m^2	28.2	0.36	2.4	25	35	min,max	kg/m^2	28.2	28	25	20	0.357771	2.4	25	35	NA
1	Wang 2020	Intervention	NCT01235832	Methods section Wang 2015	Baseline Average American Diet	NA	ITT	Summary	Subject Characteristics	Race	Race	African-American	African-American	NA		NA		45	Count	Count	NA	NA	NA	NA	NA	NA	Count	NA	NA	NA	NA	NA	NA	NA	NA	NA
1	Wang 2020	Intervention	NCT01235832	Methods section Wang 2015	Baseline Average American Diet	NA	ITT	Summary	Subject Characteristics	Race	Race	African-American	African-American	NA		NA		45	Percentage	%	NA	NA	NA	NA	NA	NA	%	NA	NA	NA	NA	NA	NA	NA	NA	NA
1	Wang 2020	Intervention	NCT01235832	Methods section Wang 2015	Baseline Average American Diet	NA	ITT	Summary	Subject Characteristics	Race	Race	Asian	Asian	NA		NA		45	Count	Count	NA	NA	NA	NA	NA	NA	Count	NA	NA	NA	NA	NA	NA	NA	NA	NA
1	Wang 2020	Intervention	NCT01235832	Methods section Wang 2015	Baseline Average American Diet	NA	ITT	Summary	Subject Characteristics	Race	Race	Asian	Asian	NA		NA		45	Percentage	%	NA	NA	NA	NA	NA	NA	%	NA	NA	NA	NA	NA	NA	NA	NA	NA
1	Wang 2020	Intervention	NCT01235832	Methods section Wang 2015	Baseline Average American Diet	NA	ITT	Summary	Subject Characteristics	Race	Race	Caucasian	Caucasian and non-Hispanic	NA		NA		45	Count	Count	NA	NA	NA	NA	NA	NA	Count	NA	NA	NA	NA	NA	NA	NA	NA	NA
1	Wang 2020	Intervention	NCT01235832	Methods section Wang 2015	Baseline Average American Diet	NA	ITT	Summary	Subject Characteristics	Race	Race	Caucasian	Caucasian and non-Hispanic	NA		NA		45	Percentage	%	NA	NA	NA	NA	NA	NA	%	NA	NA	NA	NA	NA	NA	NA	NA	NA
1	Wang 2020	Intervention	NCT01235832	Methods section Wang 2015	Baseline Average American Diet	NA	ITT	Summary	Subject Characteristics	Sex	Sex	Female	Female	NA		NA		45	Count	Count	18					NA	Count	18	18	15	10					NA
1	Wang 2020	Intervention	NCT01235832	Methods section Wang 2015	Baseline Average American Diet	NA	ITT	Summary	Subject Characteristics	Sex	Sex	Female	Female	NA		NA		45	Percentage	%	40					NA	%	40	40	40	40					NA
1	Wang 2020	Intervention	NCT01235832	Methods section Wang 2015	Baseline Average American Diet	NA	ITT	Summary	Subject Characteristics	Sex	Sex	Male	Male	NA		NA		45	Count	Count	27					NA	Count	27	27	25	20					NA
1	Wang 2020	Intervention	NCT01235832	Methods section Wang 2015	Baseline Average American Diet	NA	ITT	Summary	Subject Characteristics	Sex	Sex	Male	Male	NA		NA		45	Percentage	%	60					NA	%	60	60	60	60					NA
1	Wang 2020	Intervention	NCT01235832	Supplemental Table 3	Avocado Diet	NA	PP	Within	Outcome	Immune	ICAM-1	ICAM-1	ICAM1	Blood	5	weeks	5	21	Mean	relative mRNA expression, change-in	NA	NA	NA	NA	NA	SD	relative mRNA expression, change-in	NA	NA	NA	NA	NA	NA	NA	NA	NA
1	Wang 2020	Intervention	NCT01235832	Supplemental Table 3	Avocado Diet	NA	PP	Within	Outcome	Immune	IL-1b	IL-1b	IL1B	Blood	5	weeks	5	21	Mean	relative mRNA expression, change-in	NA	NA	NA	NA	NA	SD	relative mRNA expression, change-in	NA	NA	NA	NA	NA	NA	NA	NA	NA
1	Wang 2020	Intervention	NCT01235832	Supplemental Table 3	Avocado Diet	NA	PP	Within	Outcome	Immune	MCP-1	MCP-1	MCP1	Blood	5	weeks	5	21	Mean	relative mRNA expression, change-in	NA	NA	NA	NA	NA	SD	relative mRNA expression, change-in	NA	NA	NA	NA	NA	NA	NA	NA	NA
1	Wang 2020	Intervention	NCT01235832	Supplemental Table 3	Avocado Diet	NA	PP	Within	Outcome	Immune	VCAM-1	VCAM-1	VCAM-1	Blood	5	weeks	5	21	Mean	relative mRNA expression, change-in	NA	NA	NA	NA	NA	SD	relative mRNA expression, change-in	NA	NA	NA	NA	NA	NA	NA	NA	NA
1	Wang 2020	Intervention	NCT01235832	Supplemental Table 3	Baseline Average American Diet	NA	ITT	Summary	Outcome	Immune	ICAM-1	ICAM-1	ICAM1	Blood	2	weeks	2	21	Mean	relative mRNA expression, change-in	NA	NA	NA	NA	NA	SD	relative mRNA expression, change-in	NA	NA	NA	NA	NA	NA	NA	NA	NA
1	Wang 2020	Intervention	NCT01235832	Supplemental Table 3	Baseline Average American Diet	NA	ITT	Summary	Outcome	Immune	IL-1b	IL-1b	IL1B	Blood	2	weeks	2	21	Mean	relative mRNA expression, change-in	NA	NA	NA	NA	NA	SD	relative mRNA expression, change-in	NA	NA	NA	NA	NA	NA	NA	NA	NA
1	Wang 2020	Intervention	NCT01235832	Supplemental Table 3	Baseline Average American Diet	NA	ITT	Summary	Outcome	Immune	MCP-1	MCP-1	MCP1	Blood	2	weeks	2	21	Mean	relative mRNA expression, change-in	NA	NA	NA	NA	NA	SD	relative mRNA expression, change-in	NA	NA	NA	NA	NA	NA	NA	NA	NA
1	Wang 2020	Intervention	NCT01235832	Supplemental Table 3	Baseline Average American Diet	NA	ITT	Summary	Outcome	Immune	VCAM-1	VCAM-1	VCAM-1	Blood	2	weeks	2	21	Mean	relative mRNA expression, change-in	NA	NA	NA	NA	NA	SD	relative mRNA expression, change-in	NA	NA	NA	NA	NA	NA	NA	NA	NA
1	Wang 2020	Intervention	NCT01235832	Supplemental Table 3	Lower-Fat diet	NA	PP	Within	Outcome	Immune	ICAM-1	ICAM-1	ICAM1	Blood	5	weeks	5	21	Mean	relative mRNA expression, change-in	NA	NA	NA	NA	NA	SD	relative mRNA expression, change-in	NA	NA	NA	NA	NA	NA	NA	NA	NA
1	Wang 2020	Intervention	NCT01235832	Supplemental Table 3	Lower-Fat diet	NA	PP	Within	Outcome	Immune	IL-1b	IL-1b	IL1B	Blood	5	weeks	5	21	Mean	relative mRNA expression, change-in	NA	NA	NA	NA	NA	SD	relative mRNA expression, change-in	NA	NA	NA	NA	NA	NA	NA	NA	NA
1	Wang 2020	Intervention	NCT01235832	Supplemental Table 3	Lower-Fat diet	NA	PP	Within	Outcome	Immune	MCP-1	MCP-1	MCP1	Blood	5	weeks	5	21	Mean	relative mRNA expression, change-in	NA	NA	NA	NA	NA	SD	relative mRNA expression, change-in	NA	NA	NA	NA	NA	NA	NA	NA	NA
1	Wang 2020	Intervention	NCT01235832	Supplemental Table 3	Lower-Fat diet	NA	PP	Within	Outcome	Immune	VCAM-1	VCAM-1	VCAM-1	Blood	5	weeks	5	21	Mean	relative mRNA expression, change-in	NA	NA	NA	NA	NA	SD	relative mRNA expression, change-in	NA	NA	NA	NA	NA	NA	NA	NA	NA
1	Wang 2020	Intervention	NCT01235832	Supplemental Table 3	Moderate-Fat diet	NA	PP	Within	Outcome	Immune	ICAM-1	ICAM-1	ICAM1	Blood	5	weeks	5	21	Mean	relative mRNA expression, change-in	NA	NA	NA	NA	NA	SD	relative mRNA expression, change-in	NA	NA	NA	NA	NA	NA	NA	NA	NA
1	Wang 2020	Intervention	NCT01235832	Supplemental Table 3	Moderate-Fat diet	NA	PP	Within	Outcome	Immune	IL-1b	IL-1b	IL1B	Blood	5	weeks	5	21	Mean	relative mRNA expression, change-in	NA	NA	NA	NA	NA	SD	relative mRNA expression, change-in	NA	NA	NA	NA	NA	NA	NA	NA	NA
1	Wang 2020	Intervention	NCT01235832	Supplemental Table 3	Moderate-Fat diet	NA	PP	Within	Outcome	Immune	MCP-1	MCP-1	MCP1	Blood	5	weeks	5	21	Mean	relative mRNA expression, change-in	NA	NA	NA	NA	NA	SD	relative mRNA expression, change-in	NA	NA	NA	NA	NA	NA	NA	NA	NA
1	Wang 2020	Intervention	NCT01235832	Supplemental Table 3	Moderate-Fat diet	NA	PP	Within	Outcome	Immune	VCAM-1	VCAM-1	VCAM-1	Blood	5	weeks	5	21	Mean	relative mRNA expression, change-in	NA	NA	NA	NA	NA	SD	relative mRNA expression, change-in	NA	NA	NA	NA	NA	NA	NA	NA	NA
1	Wang 2020	Intervention	NCT01235832	Table 1	Avocado Diet	NA	PP	Summary	Dietary	Macronutrients	Carbohydrates	Carbohydrates	CHO	NA		NA		43	Absolute value	%E	NA	NA	NA	NA	NA	NA	%E	NA	NA	NA	NA	NA	NA	NA	NA	NA
1	Wang 2020	Intervention	NCT01235832	Table 1	Avocado Diet	NA	PP	Summary	Dietary	Cholesterol	Cholesterol	Cholesterol	Cholesterol	NA		NA		43	Absolute value	mg/d	NA	NA	NA	NA	NA	NA	mg/d	NA	NA	NA	NA	NA	NA	NA	NA	NA
1	Wang 2020	Intervention	NCT01235832	Table 1	Avocado Diet	NA	PP	Summary	Dietary	Macronutrients	Fat	Fat	Total fat	NA		NA		43	Absolute value	%E	NA	NA	NA	NA	NA	NA	%E	NA	NA	NA	NA	NA	NA	NA	NA	NA
1	Wang 2020	Intervention	NCT01235832	Table 1	Avocado Diet	NA	PP	Summary	Dietary	Fiber	Fiber	Fiber	Fiber	NA		NA		43	Absolute value	g	NA	NA	NA	NA	NA	NA	g/d	NA	NA	NA	NA	NA	NA	NA	NA	NA
1	Wang 2020	Intervention	NCT01235832	Table 1	Avocado Diet	NA	PP	Summary	Dietary	Carotenoids	Lutein & Zeaxanthin	Lutein & Zeaxanthin	Lutein & zeaxanthin	NA		NA		43	Absolute value	ug/d	NA	NA	NA	NA	NA	NA	μg/d	NA	NA	NA	NA	NA	NA	NA	NA	NA
1	Wang 2020	Intervention	NCT01235832	Table 1	Avocado Diet	NA	PP	Summary	Dietary	Carotenoids	Lycopene	Lycopene	Lycopene	NA		NA		43	Absolute value	ug	NA	NA	NA	NA	NA	NA	μg/d	NA	NA	NA	NA	NA	NA	NA	NA	NA
1	Wang 2020	Intervention	NCT01235832	Table 1	Avocado Diet	NA	PP	Summary	Dietary	Fatty acids	MUFA	MUFA	MUFA	NA		NA		43	Absolute value	%E	NA	NA	NA	NA	NA	NA	%E	NA	NA	NA	NA	NA	NA	NA	NA	NA
1	Wang 2020	Intervention	NCT01235832	Table 1	Avocado Diet	NA	PP	Summary	Dietary	Macronutrients	Protein	Protein	PRO	NA		NA		43	Absolute value	%E	NA	NA	NA	NA	NA	NA	%E	NA	NA	NA	NA	NA	NA	NA	NA	NA
1	Wang 2020	Intervention	NCT01235832	Table 1	Avocado Diet	NA	PP	Summary	Dietary	Fatty acids	PUFA	PUFA	PUFA	NA		NA		43	Absolute value	%E	NA	NA	NA	NA	NA	NA	%E	NA	NA	NA	NA	NA	NA	NA	NA	NA
1	Wang 2020	Intervention	NCT01235832	Table 1	Avocado Diet	NA	PP	Summary	Dietary	Fatty acids	SFA	SFA	SFA	NA		NA		43	Absolute value	%E	NA	NA	NA	NA	NA	NA	%E	NA	NA	NA	NA	NA	NA	NA	NA	NA
1	Wang 2020	Intervention	NCT01235832	Table 1	Avocado Diet	NA	PP	Summary	Dietary	Vitamins	Vitamin A	Vitamin A	Retinol	NA		NA		43	Absolute value	ug	NA	NA	NA	NA	NA	NA	mg/d	NA	NA	NA	NA	NA	NA	NA	NA	NA
1	Wang 2020	Intervention	NCT01235832	Table 1	Avocado Diet	NA	PP	Summary	Dietary	Vitamins	Vitamin E	Vitamin E	α-tocopherol	NA		NA		43	Absolute value	ug	NA	NA	NA	NA	NA	NA	mg/d	NA	NA	NA	NA	NA	NA	NA	NA	NA
1	Wang 2020	Intervention	NCT01235832	Table 1	Avocado Diet	NA	PP	Summary	Dietary	Carotenoids	α-carotene	α-carotene	α-carotene	NA		NA		43	Absolute value	ug	NA	NA	NA	NA	NA	NA	μg/d	NA	NA	NA	NA	NA	NA	NA	NA	NA
1	Wang 2020	Intervention	NCT01235832	Table 1	Avocado Diet	NA	PP	Summary	Dietary	Carotenoids	β-carotene	β-carotene	β-carotene	NA		NA		43	Absolute value	ug	NA	NA	NA	NA	NA	NA	μg/d	NA	NA	NA	NA	NA	NA	NA	NA	NA
1	Wang 2020	Intervention	NCT01235832	Table 1	Baseline Average American Diet	NA	ITT	Summary	Dietary	Macronutrients	Carbohydrates	Carbohydrates	CHO	NA		NA		45	Absolute value	%E	NA	NA	NA	NA	NA	NA	%E	NA	NA	NA	NA	NA	NA	NA	NA	NA
1	Wang 2020	Intervention	NCT01235832	Table 1	Baseline Average American Diet	NA	ITT	Summary	Dietary	Cholesterol	Cholesterol	Cholesterol	Cholesterol	NA		NA		45	Absolute value	mg/d	NA	NA	NA	NA	NA	NA	mg/d	NA	NA	NA	NA	NA	NA	NA	NA	NA
1	Wang 2020	Intervention	NCT01235832	Table 1	Baseline Average American Diet	NA	ITT	Summary	Dietary	Macronutrients	Fat	Fat	Total fat	NA		NA		45	Absolute value	%E	NA	NA	NA	NA	NA	NA	%E	NA	NA	NA	NA	NA	NA	NA	NA	NA
1	Wang 2020	Intervention	NCT01235832	Table 1	Baseline Average American Diet	NA	ITT	Summary	Dietary	Fiber	Fiber	Fiber	Fiber	NA		NA		45	Absolute value	g	NA	NA	NA	NA	NA	NA	g/d	NA	NA	NA	NA	NA	NA	NA	NA	NA
1	Wang 2020	Intervention	NCT01235832	Table 1	Baseline Average American Diet	NA	ITT	Summary	Dietary	Carotenoids	Lutein & Zeaxanthin	Lutein & Zeaxanthin	Lutein & zeaxanthin	NA		NA		45	Absolute value	ug/d	NA	NA	NA	NA	NA	NA	μg/d	NA	NA	NA	NA	NA	NA	NA	NA	NA
1	Wang 2020	Intervention	NCT01235832	Table 1	Baseline Average American Diet	NA	ITT	Summary	Dietary	Carotenoids	Lycopene	Lycopene	Lycopene	NA		NA		45	Absolute value	ug	NA	NA	NA	NA	NA	NA	μg/d	NA	NA	NA	NA	NA	NA	NA	NA	NA
1	Wang 2020	Intervention	NCT01235832	Table 1	Baseline Average American Diet	NA	ITT	Summary	Dietary	Fatty acids	MUFA	MUFA	Total fat, MUFA	NA		NA		45	Absolute value	%E	NA	NA	NA	NA	NA	NA	%E	NA	NA	NA	NA	NA	NA	NA	NA	NA
1	Wang 2020	Intervention	NCT01235832	Table 1	Baseline Average American Diet	NA	ITT	Summary	Dietary	Macronutrients	Protein	Protein	PRO	NA		NA		45	Absolute value	%E	NA	NA	NA	NA	NA	NA	%E	NA	NA	NA	NA	NA	NA	NA	NA	NA
1	Wang 2020	Intervention	NCT01235832	Table 1	Baseline Average American Diet	NA	ITT	Summary	Dietary	Fatty acids	PUFA	PUFA	Total fat, PUFA	NA		NA		45	Absolute value	%E	NA	NA	NA	NA	NA	NA	%E	NA	NA	NA	NA	NA	NA	NA	NA	NA
1	Wang 2020	Intervention	NCT01235832	Table 1	Baseline Average American Diet	NA	ITT	Summary	Dietary	Fatty acids	SFA	SFA	Total fat, SFA	NA		NA		45	Absolute value	%E	NA	NA	NA	NA	NA	NA	%E	NA	NA	NA	NA	NA	NA	NA	NA	NA
1	Wang 2020	Intervention	NCT01235832	Table 1	Baseline Average American Diet	NA	ITT	Summary	Dietary	Vitamins	Vitamin A	Vitamin A	Retinol	NA		NA		45	Absolute value	ug	NA	NA	NA	NA	NA	NA	mg/d	NA	NA	NA	NA	NA	NA	NA	NA	NA
1	Wang 2020	Intervention	NCT01235832	Table 1	Baseline Average American Diet	NA	ITT	Summary	Dietary	Vitamins	Vitamin E	Vitamin E	α-tocopherol	NA		NA		45	Absolute value	ug	NA	NA	NA	NA	NA	NA	mg/d	NA	NA	NA	NA	NA	NA	NA	NA	NA
1	Wang 2020	Intervention	NCT01235832	Table 1	Baseline Average American Diet	NA	ITT	Summary	Dietary	Carotenoids	α-carotene	α-carotene	α-carotene	NA		NA		45	Absolute value	ug	NA	NA	NA	NA	NA	NA	μg/d	NA	NA	NA	NA	NA	NA	NA	NA	NA
1	Wang 2020	Intervention	NCT01235832	Table 1	Baseline Average American Diet	NA	ITT	Summary	Dietary	Carotenoids	β-carotene	β-carotene	β-carotene	NA		NA		45	Absolute value	ug	NA	NA	NA	NA	NA	NA	μg/d	NA	NA	NA	NA	NA	NA	NA	NA	NA
1	Wang 2020	Intervention	NCT01235832	Table 1	Lower-Fat diet	NA	PP	Summary	Dietary	Macronutrients	Carbohydrates	Carbohydrates	CHO	NA		NA		43	Absolute value	%E	NA	NA	NA	NA	NA	NA	%E	NA	NA	NA	NA	NA	NA	NA	NA	NA
1	Wang 2020	Intervention	NCT01235832	Table 1	Lower-Fat diet	NA	PP	Summary	Dietary	Cholesterol	Cholesterol	Cholesterol	Cholesterol	NA		NA		43	Absolute value	mg/d	NA	NA	NA	NA	NA	NA	mg/d	NA	NA	NA	NA	NA	NA	NA	NA	NA
1	Wang 2020	Intervention	NCT01235832	Table 1	Lower-Fat diet	NA	PP	Summary	Dietary	Macronutrients	Fat	Fat	Total fat	NA		NA		43	Absolute value	%E	NA	NA	NA	NA	NA	NA	%E	NA	NA	NA	NA	NA	NA	NA	NA	NA
1	Wang 2020	Intervention	NCT01235832	Table 1	Lower-Fat diet	NA	PP	Summary	Dietary	Fiber	Fiber	Fiber	Fiber	NA		NA		43	Absolute value	g	NA	NA	NA	NA	NA	NA	g/d	NA	NA	NA	NA	NA	NA	NA	NA	NA
1	Wang 2020	Intervention	NCT01235832	Table 1	Lower-Fat diet	NA	PP	Summary	Dietary	Carotenoids	Lutein & Zeaxanthin	Lutein & Zeaxanthin	Lutein & zeaxanthin	NA		NA		43	Absolute value	ug/d	NA	NA	NA	NA	NA	NA	μg/d	NA	NA	NA	NA	NA	NA	NA	NA	NA
1	Wang 2020	Intervention	NCT01235832	Table 1	Lower-Fat diet	NA	PP	Summary	Dietary	Carotenoids	Lycopene	Lycopene	Lycopene	NA		NA		43	Absolute value	ug	NA	NA	NA	NA	NA	NA	μg/d	NA	NA	NA	NA	NA	NA	NA	NA	NA
1	Wang 2020	Intervention	NCT01235832	Table 1	Lower-Fat diet	NA	PP	Summary	Dietary	Fatty acids	MUFA	MUFA	MUFA	NA		NA		43	Absolute value	%E	NA	NA	NA	NA	NA	NA	%E	NA	NA	NA	NA	NA	NA	NA	NA	NA
1	Wang 2020	Intervention	NCT01235832	Table 1	Lower-Fat diet	NA	PP	Summary	Dietary	Macronutrients	Protein	Protein	PRO	NA		NA		43	Absolute value	%E	NA	NA	NA	NA	NA	NA	%E	NA	NA	NA	NA	NA	NA	NA	NA	NA
1	Wang 2020	Intervention	NCT01235832	Table 1	Lower-Fat diet	NA	PP	Summary	Dietary	Fatty acids	PUFA	PUFA	PUFA	NA		NA		43	Absolute value	%E	NA	NA	NA	NA	NA	NA	%E	NA	NA	NA	NA	NA	NA	NA	NA	NA
1	Wang 2020	Intervention	NCT01235832	Table 1	Lower-Fat diet	NA	PP	Summary	Dietary	Fatty acids	SFA	SFA	SFA	NA		NA		43	Absolute value	%E	NA	NA	NA	NA	NA	NA	%E	NA	NA	NA	NA	NA	NA	NA	NA	NA
1	Wang 2020	Intervention	NCT01235832	Table 1	Lower-Fat diet	NA	PP	Summary	Dietary	Vitamins	Vitamin A	Vitamin A	Retinol	NA		NA		43	Absolute value	ug	NA	NA	NA	NA	NA	NA	mg/d	NA	NA	NA	NA	NA	NA	NA	NA	NA
1	Wang 2020	Intervention	NCT01235832	Table 1	Lower-Fat diet	NA	PP	Summary	Dietary	Vitamins	Vitamin E	Vitamin E	α-tocopherol	NA		NA		43	Absolute value	ug	NA	NA	NA	NA	NA	NA	mg/d	NA	NA	NA	NA	NA	NA	NA	NA	NA
1	Wang 2020	Intervention	NCT01235832	Table 1	Lower-Fat diet	NA	PP	Summary	Dietary	Carotenoids	α-carotene	α-carotene	α-carotene	NA		NA		43	Absolute value	ug	NA	NA	NA	NA	NA	NA	μg/d	NA	NA	NA	NA	NA	NA	NA	NA	NA
1	Wang 2020	Intervention	NCT01235832	Table 1	Lower-Fat diet	NA	PP	Summary	Dietary	Carotenoids	β-carotene	β-carotene	β-carotene	NA		NA		43	Absolute value	ug	NA	NA	NA	NA	NA	NA	μg/d	NA	NA	NA	NA	NA	NA	NA	NA	NA
1	Wang 2020	Intervention	NCT01235832	Table 1	Moderate-Fat diet	NA	PP	Summary	Dietary	Macronutrients	Carbohydrates	Carbohydrates	CHO	NA		NA		42	Absolute value	%E	NA	NA	NA	NA	NA	NA	%E	NA	NA	NA	NA	NA	NA	NA	NA	NA
1	Wang 2020	Intervention	NCT01235832	Table 1	Moderate-Fat diet	NA	PP	Summary	Dietary	Cholesterol	Cholesterol	Cholesterol	Cholesterol	NA		NA		42	Absolute value	mg/d	NA	NA	NA	NA	NA	NA	mg/d	NA	NA	NA	NA	NA	NA	NA	NA	NA
1	Wang 2020	Intervention	NCT01235832	Table 1	Moderate-Fat diet	NA	PP	Summary	Dietary	Macronutrients	Fat	Fat	Total fat	NA		NA		42	Absolute value	%E	NA	NA	NA	NA	NA	NA	%E	NA	NA	NA	NA	NA	NA	NA	NA	NA
1	Wang 2020	Intervention	NCT01235832	Table 1	Moderate-Fat diet	NA	PP	Summary	Dietary	Fiber	Fiber	Fiber	Fiber	NA		NA		42	Absolute value	g	NA	NA	NA	NA	NA	NA	g/d	NA	NA	NA	NA	NA	NA	NA	NA	NA
1	Wang 2020	Intervention	NCT01235832	Table 1	Moderate-Fat diet	NA	PP	Summary	Dietary	Carotenoids	Lutein & Zeaxanthin	Lutein & Zeaxanthin	Lutein & zeaxanthin	NA		NA		42	Absolute value	ug/d	NA	NA	NA	NA	NA	NA	μg/d	NA	NA	NA	NA	NA	NA	NA	NA	NA
1	Wang 2020	Intervention	NCT01235832	Table 1	Moderate-Fat diet	NA	PP	Summary	Dietary	Carotenoids	Lycopene	Lycopene	Lycopene	NA		NA		42	Absolute value	ug	NA	NA	NA	NA	NA	NA	μg/d	NA	NA	NA	NA	NA	NA	NA	NA	NA
1	Wang 2020	Intervention	NCT01235832	Table 1	Moderate-Fat diet	NA	PP	Summary	Dietary	Fatty acids	MUFA	MUFA	MUFA	NA		NA		42	Absolute value	%E	NA	NA	NA	NA	NA	NA	%E	NA	NA	NA	NA	NA	NA	NA	NA	NA
1	Wang 2020	Intervention	NCT01235832	Table 1	Moderate-Fat diet	NA	PP	Summary	Dietary	Macronutrients	Protein	Protein	PRO	NA		NA		42	Absolute value	%E	NA	NA	NA	NA	NA	NA	%E	NA	NA	NA	NA	NA	NA	NA	NA	NA
1	Wang 2020	Intervention	NCT01235832	Table 1	Moderate-Fat diet	NA	PP	Summary	Dietary	Fatty acids	PUFA	PUFA	PUFA	NA		NA		42	Absolute value	%E	NA	NA	NA	NA	NA	NA	%E	NA	NA	NA	NA	NA	NA	NA	NA	NA
1	Wang 2020	Intervention	NCT01235832	Table 1	Moderate-Fat diet	NA	PP	Summary	Dietary	Fatty acids	SFA	SFA	SFA	NA		NA		42	Absolute value	%E	NA	NA	NA	NA	NA	NA	%E	NA	NA	NA	NA	NA	NA	NA	NA	NA
1	Wang 2020	Intervention	NCT01235832	Table 1	Moderate-Fat diet	NA	PP	Summary	Dietary	Vitamins	Vitamin A	Vitamin A	Retinol	NA		NA		42	Absolute value	ug	NA	NA	NA	NA	NA	NA	mg/d	NA	NA	NA	NA	NA	NA	NA	NA	NA
1	Wang 2020	Intervention	NCT01235832	Table 1	Moderate-Fat diet	NA	PP	Summary	Dietary	Vitamins	Vitamin E	Vitamin E	α-tocopherol	NA		NA		42	Absolute value	ug	NA	NA	NA	NA	NA	NA	mg/d	NA	NA	NA	NA	NA	NA	NA	NA	NA
1	Wang 2020	Intervention	NCT01235832	Table 1	Moderate-Fat diet	NA	PP	Summary	Dietary	Carotenoids	α-carotene	α-carotene	α-carotene	NA		NA		42	Absolute value	ug	NA	NA	NA	NA	NA	NA	μg/d	NA	NA	NA	NA	NA	NA	NA	NA	NA
1	Wang 2020	Intervention	NCT01235832	Table 1	Moderate-Fat diet	NA	PP	Summary	Dietary	Carotenoids	β-carotene	β-carotene	β-carotene	NA		NA		42	Absolute value	ug	NA	NA	NA	NA	NA	NA	μg/d	NA	NA	NA	NA	NA	NA	NA	NA	NA
1	Wang 2020	Intervention	NCT01235832	Table 2	Avocado Diet	NA	PP	Summary	Outcome	Antioxidation	Isoprostane	Isoprostane	Isoprostane	Blood	5	weeks	5	43	Mean	pg/mL	NA	NA	NA	NA	NA	SD	pg/mL	NA	NA	NA	NA	NA	NA	NA	NA	NA
1	Wang 2020	Intervention	NCT01235832	Table 2	Avocado Diet	NA	PP	Summary	Outcome	Nutrient bioavailability	Lutein	Lutein	Lutein	Blood	5	weeks	5	43	Mean	nmol/L	NA	NA	NA	NA	NA	SD	μmol/L	NA	NA	NA	NA	NA	NA	NA	NA	NA
1	Wang 2020	Intervention	NCT01235832	Table 2	Avocado Diet	NA	PP	Summary	Outcome	Antioxidation	ox-LDL	ox-LDL	oxLDL	Blood	5	weeks	5	43	Mean	U/L	NA	NA	NA	NA	NA	SD	U/L	NA	NA	NA	NA	NA	NA	NA	NA	NA
1	Wang 2020	Intervention	NCT01235832	Table 2	Avocado Diet	NA	PP	Summary	Outcome	Nutrient bioavailability	Retinol	Retinol	Retinol	Blood	5	weeks	5	43	Mean	nmol/L	NA	NA	NA	NA	NA	SD	μmol/L	NA	NA	NA	NA	NA	NA	NA	NA	NA
1	Wang 2020	Intervention	NCT01235832	Table 2	Avocado Diet	NA	PP	Summary	Outcome	Nutrient bioavailability	α-carotene	α-carotene	α-carotene	Blood	5	weeks	5	43	Mean	nmol/L	NA	NA	NA	NA	NA	SD	μmol/L	NA	NA	NA	NA	NA	NA	NA	NA	NA
1	Wang 2020	Intervention	NCT01235832	Table 2	Avocado Diet	NA	PP	Summary	Outcome	Nutrient bioavailability	α-tocopherol	α-tocopherol	α-tocopherol	Blood	5	weeks	5	43	Mean	umol/L	NA	NA	NA	NA	NA	SD	μmol/L	NA	NA	NA	NA	NA	NA	NA	NA	NA
1	Wang 2020	Intervention	NCT01235832	Table 2	Avocado Diet	NA	PP	Summary	Outcome	Nutrient bioavailability	β-carotene	β-carotene	β-carotene	Blood	5	weeks	5	43	Mean	nmol/L	NA	NA	NA	NA	NA	SD	μmol/L	NA	NA	NA	NA	NA	NA	NA	NA	NA
1	Wang 2020	Intervention	NCT01235832	Table 2	Avocado Diet	NA	PP	Summary	Outcome	Nutrient bioavailability	γ-tocopherol	γ-tocopherol	γ-tocopherol	Blood	5	weeks	5	43	Mean	umol/L	NA	NA	NA	NA	NA	SD	μmol/L	NA	NA	NA	NA	NA	NA	NA	NA	NA
1	Wang 2020	Intervention	NCT01235832	Table 2	Avocado Diet	NA	PP	Summary	Outcome	Nutrient bioavailability	δ-tocopherol	δ-tocopherol	δ-tocopherol	Blood	5	weeks	5	43	Mean	umol/L	NA	NA	NA	NA	NA	SD	μmol/L	NA	NA	NA	NA	NA	NA	NA	NA	NA
1	Wang 2020	Intervention	NCT01235832	Table 2	Baseline Average American Diet	NA	ITT	Summary	Outcome	Antioxidation	Isoprostane	Isoprostane	Isoprostane	Blood	2	weeks	2	45	Mean	pg/mL	NA	NA	NA	NA	NA	SD	pg/mL	NA	NA	NA	NA	NA	NA	NA	NA	NA
1	Wang 2020	Intervention	NCT01235832	Table 2	Baseline Average American Diet	NA	ITT	Summary	Outcome	Nutrient bioavailability	Lutein	Lutein	Lutein	Blood	2	weeks	2	45	Mean	nmol/L	NA	NA	NA	NA	NA	SD	μmol/L	NA	NA	NA	NA	NA	NA	NA	NA	NA
1	Wang 2020	Intervention	NCT01235832	Table 2	Baseline Average American Diet	NA	ITT	Summary	Outcome	Antioxidation	ox-LDL	ox-LDL	oxLDL	Blood	2	weeks	2	45	Mean	U/L	NA	NA	NA	NA	NA	SD	U/L	NA	NA	NA	NA	NA	NA	NA	NA	NA
1	Wang 2020	Intervention	NCT01235832	Table 2	Baseline Average American Diet	NA	ITT	Summary	Outcome	Nutrient bioavailability	Retinol	Retinol	Retinol	Blood	2	weeks	2	45	Mean	nmol/L	NA	NA	NA	NA	NA	SD	μmol/L	NA	NA	NA	NA	NA	NA	NA	NA	NA
1	Wang 2020	Intervention	NCT01235832	Table 2	Baseline Average American Diet	NA	ITT	Summary	Outcome	Nutrient bioavailability	α-carotene	α-carotene	α-carotene	Blood	2	weeks	2	45	Mean	nmol/L	NA	NA	NA	NA	NA	SD	μmol/L	NA	NA	NA	NA	NA	NA	NA	NA	NA
1	Wang 2020	Intervention	NCT01235832	Table 2	Baseline Average American Diet	NA	ITT	Summary	Outcome	Nutrient bioavailability	α-tocopherol	α-tocopherol	α-tocopherol	Blood	2	weeks	2	45	Mean	umol/L	NA	NA	NA	NA	NA	SD	μmol/L	NA	NA	NA	NA	NA	NA	NA	NA	NA
1	Wang 2020	Intervention	NCT01235832	Table 2	Baseline Average American Diet	NA	ITT	Summary	Outcome	Nutrient bioavailability	β-carotene	β-carotene	β-carotene	Blood	2	weeks	2	45	Mean	nmol/L	NA	NA	NA	NA	NA	SD	μmol/L	NA	NA	NA	NA	NA	NA	NA	NA	NA
1	Wang 2020	Intervention	NCT01235832	Table 2	Baseline Average American Diet	NA	ITT	Summary	Outcome	Nutrient bioavailability	γ-tocopherol	γ-tocopherol	γ-tocopherol	Blood	2	weeks	2	45	Mean	umol/L	NA	NA	NA	NA	NA	SD	μmol/L	NA	NA	NA	NA	NA	NA	NA	NA	NA
1	Wang 2020	Intervention	NCT01235832	Table 2	Baseline Average American Diet	NA	ITT	Summary	Outcome	Nutrient bioavailability	δ-tocopherol	δ-tocopherol	δ-tocopherol	Blood	2	weeks	2	45	Mean	umol/L	NA	NA	NA	NA	NA	SD	μmol/L	NA	NA	NA	NA	NA	NA	NA	NA	NA
1	Wang 2020	Intervention	NCT01235832	Table 2	Lower-Fat diet	NA	PP	Summary	Outcome	Antioxidation	Isoprostane	Isoprostane	Isoprostane	Blood	5	weeks	5	43	Mean	pg/mL	NA	NA	NA	NA	NA	SD	pg/mL	NA	NA	NA	NA	NA	NA	NA	NA	NA
1	Wang 2020	Intervention	NCT01235832	Table 2	Lower-Fat diet	NA	PP	Summary	Outcome	Nutrient bioavailability	Lutein	Lutein	Lutein	Blood	5	weeks	5	43	Mean	nmol/L	NA	NA	NA	NA	NA	SD	μmol/L	NA	NA	NA	NA	NA	NA	NA	NA	NA
1	Wang 2020	Intervention	NCT01235832	Table 2	Lower-Fat diet	NA	PP	Summary	Outcome	Antioxidation	ox-LDL	ox-LDL	oxLDL	Blood	5	weeks	5	43	Mean	U/L	NA	NA	NA	NA	NA	SD	U/L	NA	NA	NA	NA	NA	NA	NA	NA	NA
1	Wang 2020	Intervention	NCT01235832	Table 2	Lower-Fat diet	NA	PP	Summary	Outcome	Nutrient bioavailability	Retinol	Retinol	Retinol	Blood	5	weeks	5	43	Mean	nmol/L	NA	NA	NA	NA	NA	SD	μmol/L	NA	NA	NA	NA	NA	NA	NA	NA	NA
1	Wang 2020	Intervention	NCT01235832	Table 2	Lower-Fat diet	NA	PP	Summary	Outcome	Nutrient bioavailability	α-carotene	α-carotene	α-carotene	Blood	5	weeks	5	43	Mean	nmol/L	NA	NA	NA	NA	NA	SD	μmol/L	NA	NA	NA	NA	NA	NA	NA	NA	NA
1	Wang 2020	Intervention	NCT01235832	Table 2	Lower-Fat diet	NA	PP	Summary	Outcome	Nutrient bioavailability	α-tocopherol	α-tocopherol	α-tocopherol	Blood	5	weeks	5	43	Mean	umol/L	NA	NA	NA	NA	NA	SD	μmol/L	NA	NA	NA	NA	NA	NA	NA	NA	NA
1	Wang 2020	Intervention	NCT01235832	Table 2	Lower-Fat diet	NA	PP	Summary	Outcome	Nutrient bioavailability	β-carotene	β-carotene	β-carotene	Blood	5	weeks	5	43	Mean	nmol/L	NA	NA	NA	NA	NA	SD	μmol/L	NA	NA	NA	NA	NA	NA	NA	NA	NA
1	Wang 2020	Intervention	NCT01235832	Table 2	Lower-Fat diet	NA	PP	Summary	Outcome	Nutrient bioavailability	γ-tocopherol	γ-tocopherol	γ-tocopherol	Blood	5	weeks	5	43	Mean	umol/L	NA	NA	NA	NA	NA	SD	μmol/L	NA	NA	NA	NA	NA	NA	NA	NA	NA
1	Wang 2020	Intervention	NCT01235832	Table 2	Lower-Fat diet	NA	PP	Summary	Outcome	Nutrient bioavailability	δ-tocopherol	δ-tocopherol	δ-tocopherol	Blood	5	weeks	5	43	Mean	umol/L	NA	NA	NA	NA	NA	SD	μmol/L	NA	NA	NA	NA	NA	NA	NA	NA	NA
1	Wang 2020	Intervention	NCT01235832	Table 2	Moderate-Fat diet	NA	PP	Summary	Outcome	Antioxidation	Isoprostane	Isoprostane	Isoprostane	Blood	5	weeks	5	42	Mean	pg/mL	NA	NA	NA	NA	NA	SD	pg/mL	NA	NA	NA	NA	NA	NA	NA	NA	NA
1	Wang 2020	Intervention	NCT01235832	Table 2	Moderate-Fat diet	NA	PP	Summary	Outcome	Nutrient bioavailability	Lutein	Lutein	Lutein	Blood	5	weeks	5	42	Mean	nmol/L	NA	NA	NA	NA	NA	SD	μmol/L	NA	NA	NA	NA	NA	NA	NA	NA	NA
1	Wang 2020	Intervention	NCT01235832	Table 2	Moderate-Fat diet	NA	PP	Summary	Outcome	Antioxidation	ox-LDL	ox-LDL	oxLDL	Blood	5	weeks	5	42	Mean	U/L	NA	NA	NA	NA	NA	SD	U/L	NA	NA	NA	NA	NA	NA	NA	NA	NA
1	Wang 2020	Intervention	NCT01235832	Table 2	Moderate-Fat diet	NA	PP	Summary	Outcome	Nutrient bioavailability	Retinol	Retinol	Retinol	Blood	5	weeks	5	42	Mean	nmol/L	NA	NA	NA	NA	NA	SD	μmol/L	NA	NA	NA	NA	NA	NA	NA	NA	NA
1	Wang 2020	Intervention	NCT01235832	Table 2	Moderate-Fat diet	NA	PP	Summary	Outcome	Nutrient bioavailability	α-carotene	α-carotene	α-carotene	Blood	5	weeks	5	42	Mean	nmol/L	NA	NA	NA	NA	NA	SD	μmol/L	NA	NA	NA	NA	NA	NA	NA	NA	NA
1	Wang 2020	Intervention	NCT01235832	Table 2	Moderate-Fat diet	NA	PP	Summary	Outcome	Nutrient bioavailability	α-tocopherol	α-tocopherol	α-tocopherol	Blood	5	weeks	5	42	Mean	umol/L	NA	NA	NA	NA	NA	SD	μmol/L	NA	NA	NA	NA	NA	NA	NA	NA	NA
1	Wang 2020	Intervention	NCT01235832	Table 2	Moderate-Fat diet	NA	PP	Summary	Outcome	Nutrient bioavailability	β-carotene	β-carotene	β-carotene	Blood	5	weeks	5	42	Mean	nmol/L	NA	NA	NA	NA	NA	SD	μmol/L	NA	NA	NA	NA	NA	NA	NA	NA	NA
1	Wang 2020	Intervention	NCT01235832	Table 2	Moderate-Fat diet	NA	PP	Summary	Outcome	Nutrient bioavailability	γ-tocopherol	γ-tocopherol	γ-tocopherol	Blood	5	weeks	5	42	Mean	umol/L	NA	NA	NA	NA	NA	SD	μmol/L	NA	NA	NA	NA	NA	NA	NA	NA	NA
1	Wang 2020	Intervention	NCT01235832	Table 2	Moderate-Fat diet	NA	PP	Summary	Outcome	Nutrient bioavailability	δ-tocopherol	δ-tocopherol	δ-tocopherol	Blood	5	weeks	5	42	Mean	umol/L	NA	NA	NA	NA	NA	SD	μmol/L	NA	NA	NA	NA	NA	NA	NA	NA	NA
1	Wang 2020	Intervention	NCT01235832	Table 3	Avocado Diet	NA	PP	Summary	Outcome	Lipids	Cholesterol ester transfer protein	Cholesterol ester transfer protein	CETP	Blood	5	weeks	5	43	Mean	pmol/(µL·h)	NA	NA	NA	NA	NA	SD	pmol/(µL·h)	NA	NA	NA	NA	NA	NA	NA	NA	NA
1	Wang 2020	Intervention	NCT01235832	Table 3	Avocado Diet	NA	PP	Within	Outcome	Lipids	Lecithin cholesterol acyltransferase	Lecithin cholesterol acyltransferase	LCAT	Blood	5	weeks	5	43	Mean	% change	NA	NA	NA	NA	NA	SD	% change	NA	NA	NA	NA	NA	NA	NA	NA	NA
1	Wang 2020	Intervention	NCT01235832	Table 3	Avocado Diet	NA	PP	Summary	Outcome	Lipids	Phosopholipid transfer protein	Phosopholipid transfer protein	PLTP	Blood	5	weeks	5	43	Mean	pmol/(µL·h)	NA	NA	NA	NA	NA	SD	pmol/(µL·h)	NA	NA	NA	NA	NA	NA	NA	NA	NA
1	Wang 2020	Intervention	NCT01235832	Table 3	Baseline Average American Diet	NA	ITT	Summary	Outcome	Lipids	Cholesterol ester transfer protein	Cholesterol ester transfer protein	CETP	Blood	2	weeks	2	45	Mean	pmol/(µL·h)	NA	NA	NA	NA	NA	SD	pmol/(µL·h)	NA	NA	NA	NA	NA	NA	NA	NA	NA
1	Wang 2020	Intervention	NCT01235832	Table 3	Baseline Average American Diet	NA	ITT	Summary	Outcome	Lipids	Lecithin cholesterol acyltransferase	Lecithin cholesterol acyltransferase	LCAT	Blood	2	weeks	2	45	Mean	% change	NA	NA	NA	NA	NA	SD	% change	NA	NA	NA	NA	NA	NA	NA	NA	NA
1	Wang 2020	Intervention	NCT01235832	Table 3	Baseline Average American Diet	NA	ITT	Summary	Outcome	Lipids	Phosopholipid transfer protein	Phosopholipid transfer protein	PLTP	Blood	2	weeks	2	45	Mean	pmol/(µL·h)	NA	NA	NA	NA	NA	SD	pmol/(µL·h)	NA	NA	NA	NA	NA	NA	NA	NA	NA
1	Wang 2020	Intervention	NCT01235832	Table 3	Lower-Fat diet	NA	PP	Summary	Outcome	Lipids	Cholesterol ester transfer protein	Cholesterol ester transfer protein	CETP	Blood	5	weeks	5	43	Mean	pmol/(µL·h)	NA	NA	NA	NA	NA	SD	pmol/(µL·h)	NA	NA	NA	NA	NA	NA	NA	NA	NA
1	Wang 2020	Intervention	NCT01235832	Table 3	Lower-Fat diet	NA	PP	Within	Outcome	Lipids	Lecithin cholesterol acyltransferase	Lecithin cholesterol acyltransferase	LCAT	Blood	5	weeks	5	43	Mean	% change	NA	NA	NA	NA	NA	SD	% change	NA	NA	NA	NA	NA	NA	NA	NA	NA
1	Wang 2020	Intervention	NCT01235832	Table 3	Lower-Fat diet	NA	PP	Summary	Outcome	Lipids	Phosopholipid transfer protein	Phosopholipid transfer protein	PLTP	Blood	5	weeks	5	43	Mean	pmol/(µL·h)	NA	NA	NA	NA	NA	SD	pmol/(µL·h)	NA	NA	NA	NA	NA	NA	NA	NA	NA
1	Wang 2020	Intervention	NCT01235832	Table 3	Moderate-Fat diet	NA	PP	Summary	Outcome	Lipids	Cholesterol ester transfer protein	Cholesterol ester transfer protein	CETP	Blood	5	weeks	5	42	Mean	pmol/(µL·h)	NA	NA	NA	NA	NA	SD	pmol/(µL·h)	NA	NA	NA	NA	NA	NA	NA	NA	NA
1	Wang 2020	Intervention	NCT01235832	Table 3	Moderate-Fat diet	NA	PP	Within	Outcome	Lipids	Lecithin cholesterol acyltransferase	Lecithin cholesterol acyltransferase	LCAT	Blood	5	weeks	5	42	Mean	% change	NA	NA	NA	NA	NA	SD	% change	NA	NA	NA	NA	NA	NA	NA	NA	NA
1	Wang 2020	Intervention	NCT01235832	Table 3	Moderate-Fat diet	NA	PP	Summary	Outcome	Lipids	Phosopholipid transfer protein	Phosopholipid transfer protein	PLTP	Blood	5	weeks	5	42	Mean	pmol/(µL·h)	NA	NA	NA	NA	NA	SD	pmol/(µL·h)	NA	NA	NA	NA	NA	NA	NA	NA	NA
1	Wang 2020	Intervention	NCT01235832	Table 3 Wang 2015	Baseline Average American Diet	NA	ITT	Summary	Subject Characteristics	CVD risk factors	Blood pressure	Diastolic blood pressure	DBP	NA		NA		45	Mean	mmHg	NA	NA	NA	NA	NA	SD	mmHg	NA	NA	NA	NA	NA	NA	NA	NA	NA
1	Wang 2020	Intervention	NCT01235832	Table 3 Wang 2015	Baseline Average American Diet	NA	ITT	Summary	Subject Characteristics	CVD risk factors	Blood pressure	Systolic blood pressure	SBP	NA		NA		45	Mean	mmHg	NA	NA	NA	NA	NA	SD	mmHg	NA	NA	NA	NA	NA	NA	NA	NA	NA
1	Wang 2020	Intervention	NCT01235832	Table 3 Wang 2015	Baseline Average American Diet	NA	ITT	Summary	Subject Characteristics	Immune	CRP	hsCRP	hsCRP	NA		NA		45	Median	mg/L	NA	NA	NA	NA	NA	IQR	mg/L	NA	NA	NA	NA	NA	NA	NA	NA	NA
1	Wang 2020	Intervention	NCT01235832	Table 3 Wang 2015	Baseline Average American Diet	NA	ITT	Summary	Subject Characteristics	Metabolic	Glucose	Glucose	Glucose	NA		NA		45	Mean	mg/dL	NA	NA	NA	NA	NA	SD	mg/dL	NA	NA	NA	NA	NA	NA	NA	NA	NA
1	Wang 2020	Intervention	NCT01235832	Table 3 Wang 2015	Baseline Average American Diet	NA	ITT	Summary	Subject Characteristics	Lipids	HDL-C	HDL-C	HDL-C	NA		NA		45	Mean	mg/dL	48.7	1.8	12.1	36.6	60.8	SD	mg/dL	48.7	48	45	40	1.80376	12.1	36.6	60.8	NA
1	Wang 2020	Intervention	NCT01235832	Table 3 Wang 2015	Baseline Average American Diet	NA	ITT	Summary	Subject Characteristics	Metabolic	Insulin	Insulin	Insulin	NA		NA		45	Median	µIU/mL	NA	NA	NA	NA	NA	IQR	pmol/L	NA	NA	NA	NA	NA	NA	NA	NA	NA
1	Wang 2020	Intervention	NCT01235832	Table 3 Wang 2015	Baseline Average American Diet	NA	ITT	Summary	Subject Characteristics	Lipids	LDL-C	LDL-C	LDL-C	NA		NA		45	Mean	mg/dL	128.1	3.89	26.1	102	154.2	SD	mg/dL	128.1	128	125	120	3.89076	26.1	102	154.2	NA
1	Wang 2020	Intervention	NCT01235832	Table 3 Wang 2015	Baseline Average American Diet	NA	ITT	Summary	Subject Characteristics	Lipids	Total cholesterol	Total cholesterol	TC	NA		NA		45	Mean	mg/dL	199.9	4.83	32.4	167.5	232.3	SD	mg/dL	199.9	199	195	190	4.82991	32.4	167.5	232.3	NA
1	Wang 2020	Intervention	NCT01235832	Table 3 Wang 2015	Baseline Average American Diet	NA	ITT	Summary	Subject Characteristics	Lipids	Triglycerides	Triglycerides	TG	NA		NA		45	Mean	mg/dL	114	5.9	39.6	74.4	153.6	SD	mg/dL	114	114	110	110	5.90322	39.6	74.4	153.6	NA
1	Wang 2020	Intervention	NCT01235832	Table 4 Wang 2015	Baseline Average American Diet	40-69 years old participants	ITT	Summary	Subject Characteristics	Health status	Cardiovascular diseases	ASCVD 10yr risk < 5%	ASCVD 10yr risk < 5%	NA		NA		26	Count	Count	NA	NA	NA	NA	NA	NA	Count	NA	NA	NA	NA	NA	NA	NA	NA	NA
1	Wang 2020	Intervention	NCT01235832	Table 4 Wang 2015	Baseline Average American Diet	40-69 years old participants	ITT	Summary	Subject Characteristics	Health status	Cardiovascular diseases	ASCVD 10yr risk 10-20%	ASCVD 10yr risk 10-20%	NA		NA		26	Count	Count	NA	NA	NA	NA	NA	NA	Count	NA	NA	NA	NA	NA	NA	NA	NA	NA
1	Wang 2020	Intervention	NCT01235832	Table 4 Wang 2015	Baseline Average American Diet	40-69 years old participants	ITT	Summary	Subject Characteristics	Health status	Cardiovascular diseases	ASCVD 10yr risk 5-10%	ASCVD 10yr risk 5-10%	NA		NA		26	Count	Count	NA	NA	NA	NA	NA	NA	Count	NA	NA	NA	NA	NA	NA	NA	NA	NA
1	Wang 2020	Intervention	NCT01235832	Table 4 Wang 2015	Baseline Average American Diet	20-59 years old participants	ITT	Summary	Subject Characteristics	Health status	Cardiovascular diseases	ASCVD lifetime risk 10-30%	ASCVD lifetime risk 10-30%	NA		NA		39	Count	Count	NA	NA	NA	NA	NA	NA	Count	NA	NA	NA	NA	NA	NA	NA	NA	NA
1	Wang 2020	Intervention	NCT01235832	Table 4 Wang 2015	Baseline Average American Diet	20-59 years old participants	ITT	Summary	Subject Characteristics	Health status	Cardiovascular diseases	ASCVD lifetime risk 30-50%	ASCVD lifetime risk 30-50%	NA		NA		39	Count	Count	NA	NA	NA	NA	NA	NA	Count	NA	NA	NA	NA	NA	NA	NA	NA	NA
1	Wang 2020	Intervention	NCT01235832	Table 4 Wang 2015	Baseline Average American Diet	20-59 years old participants	ITT	Summary	Subject Characteristics	Health status	Cardiovascular diseases	ASCVD lifetime risk 5-10%	ASCVD lifetime risk 5-10%	NA		NA		39	Count	Count	NA	NA	NA	NA	NA	NA	Count	NA	NA	NA	NA	NA	NA	NA	NA	NA
1	Wang 2020	Intervention	NCT01235832	Table 4 Wang 2015	Baseline Average American Diet	NA	ITT	Summary	Subject Characteristics	Health status	Metabolic syndrome	MetS risk factors, 0	MetS risk factors, 0	NA		NA		45	Count	Count	NA	NA	NA	NA	NA	NA	Count	NA	NA	NA	NA	NA	NA	NA	NA	NA
1	Wang 2020	Intervention	NCT01235832	Table 4 Wang 2015	Baseline Average American Diet	NA	ITT	Summary	Subject Characteristics	Health status	Metabolic syndrome	MetS risk factors, 1-2	MetS risk factors, 1-2	NA		NA		45	Count	Count	NA	NA	NA	NA	NA	NA	Count	NA	NA	NA	NA	NA	NA	NA	NA	NA
1	Wang 2020	Intervention	NCT01235832	Table 4 Wang 2015	Baseline Average American Diet	NA	ITT	Summary	Subject Characteristics	Health status	Metabolic syndrome	MetS risk factors, 3-4	MetS risk factors, 3-4	NA		NA		45	Count	Count	NA	NA	NA	NA	NA	NA	Count	NA	NA	NA	NA	NA	NA	NA	NA	NA
2	Wien 2013	Intervention	NCT01271829	Figure 1	Avocado added	NA	PP	Summary	Outcome	Glycemia	Glucose	Glucose AUC 3h	Glucose AUC 3hrs	Blood		NA		7	Mean	min x mg/dl	NA	NA	NA	NA	NA	SD	mg/dL per h	NA	NA	NA	NA	NA	NA	NA	NA	NA
2	Wien 2013	Intervention	NCT01271829	Figure 1	Avocado added	NA	PP	Summary	Outcome	Glycemia	Insulin	Insulin AUC 3h	Insulin AUC 3hrs	Blood		NA		7	Mean	min x uIU/ml	NA	NA	NA	NA	NA	SD	pmol/L per h	NA	NA	NA	NA	NA	NA	NA	NA	NA
2	Wien 2013	Intervention	NCT01271829	Figure 1	Avocado inclusive	NA	PP	Summary	Outcome	Glycemia	Glucose	Glucose AUC 3h	Glucose AUC 3hrs	Blood		NA		9	Mean	min x mg/dl	NA	NA	NA	NA	NA	SD	mg/dL per h	NA	NA	NA	NA	NA	NA	NA	NA	NA
2	Wien 2013	Intervention	NCT01271829	Figure 1	Avocado inclusive	NA	PP	Summary	Outcome	Glycemia	Insulin	Insulin AUC 3h	Insulin AUC 3hrs	Blood		NA		9	Mean	min x uIU/ml	NA	NA	NA	NA	NA	SD	pmol/L per h	NA	NA	NA	NA	NA	NA	NA	NA	NA
2	Wien 2013	Intervention	NCT01271829	Figure 1	Control	NA	PP	Summary	Outcome	Glycemia	Glucose	Glucose AUC 3h	Glucose AUC 3hrs	Blood		NA		10	Mean	min x mg/dl	NA	NA	NA	NA	NA	SD	mg/dL per h	NA	NA	NA	NA	NA	NA	NA	NA	NA
2	Wien 2013	Intervention	NCT01271829	Figure 1	Control	NA	PP	Summary	Outcome	Glycemia	Insulin	Insulin AUC 3h	Insulin AUC 3hrs	Blood		NA		10	Mean	min x uIU/ml	NA	NA	NA	NA	NA	SD	pmol/L per h	NA	NA	NA	NA	NA	NA	NA	NA	NA
2	Wien 2013	Intervention	NCT01271829	Figure 2	Avocado added	NA	PP	Summary	Outcome	Satiety	Desire question	Desire question AUC 5h	Desire AUC 5hrs	NA		NA		7	Mean	mm x min	NA	NA	NA	NA	NA	SD	mm per min	NA	NA	NA	NA	NA	NA	NA	NA	NA
2	Wien 2013	Intervention	NCT01271829	Figure 2	Avocado added	NA	PP	Summary	Outcome	Satiety	Fullness question	Fullness question AUC 5h	Fullness AUC 5hrs	NA		NA		7	Mean	min x mm	NA	NA	NA	NA	NA	SD	mm per min	NA	NA	NA	NA	NA	NA	NA	NA	NA
2	Wien 2013	Intervention	NCT01271829	Figure 2	Avocado added	NA	PP	Summary	Outcome	Satiety	Hunger question	Hunger question AUC 5h	Hungry AUC 5hrs	NA		NA		7	Mean	min x mm	NA	NA	NA	NA	NA	SD	mm per min	NA	NA	NA	NA	NA	NA	NA	NA	NA
2	Wien 2013	Intervention	NCT01271829	Figure 2	Avocado added	NA	PP	Summary	Outcome	Satiety	Intake question	Intake question AUC 5h	How much AUC 5hrs	NA		NA		7	Mean	min x mm	NA	NA	NA	NA	NA	SD	mm per min	NA	NA	NA	NA	NA	NA	NA	NA	NA
2	Wien 2013	Intervention	NCT01271829	Figure 2	Avocado added	NA	PP	Summary	Outcome	Satiety	Satisfaction question	Satisfaction question AUC 5h	Satisfied AUC 5hrs	NA		NA		7	Mean	min x mm	NA	NA	NA	NA	NA	SD	mm per min	NA	NA	NA	NA	NA	NA	NA	NA	NA
2	Wien 2013	Intervention	NCT01271829	Figure 2	Avocado inclusive	NA	PP	Summary	Outcome	Satiety	Desire question	Desire question AUC 5h	Desire AUC 5hrs	NA		NA		9	Mean	mm x min	NA	NA	NA	NA	NA	SD	mm per min	NA	NA	NA	NA	NA	NA	NA	NA	NA
2	Wien 2013	Intervention	NCT01271829	Figure 2	Avocado inclusive	NA	PP	Summary	Outcome	Satiety	Fullness question	Fullness question AUC 5h	Fullness AUC 5hrs	NA		NA		9	Mean	min x mm	NA	NA	NA	NA	NA	SD	mm per min	NA	NA	NA	NA	NA	NA	NA	NA	NA
2	Wien 2013	Intervention	NCT01271829	Figure 2	Avocado inclusive	NA	PP	Summary	Outcome	Satiety	Hunger question	Hunger question AUC 5h	Hungry AUC 5hrs	NA		NA		9	Mean	min x mm	NA	NA	NA	NA	NA	SD	mm per min	NA	NA	NA	NA	NA	NA	NA	NA	NA
2	Wien 2013	Intervention	NCT01271829	Figure 2	Avocado inclusive	NA	PP	Summary	Outcome	Satiety	Intake question	Intake question AUC 5h	How much AUC 5hrs	NA		NA		9	Mean	min x mm	NA	NA	NA	NA	NA	SD	mm per min	NA	NA	NA	NA	NA	NA	NA	NA	NA
2	Wien 2013	Intervention	NCT01271829	Figure 2	Avocado inclusive	NA	PP	Summary	Outcome	Satiety	Satisfaction question	Satisfaction question AUC 5h	Satisfied AUC 5hrs	NA		NA		9	Mean	min x mm	NA	NA	NA	NA	NA	SD	mm per min	NA	NA	NA	NA	NA	NA	NA	NA	NA
2	Wien 2013	Intervention	NCT01271829	Figure 2	Control	NA	PP	Summary	Outcome	Satiety	Desire question	Desire question AUC 5h	Desire AUC 5hrs	NA		NA		10	Mean	mm x min	NA	NA	NA	NA	NA	SD	mm per min	NA	NA	NA	NA	NA	NA	NA	NA	NA
2	Wien 2013	Intervention	NCT01271829	Figure 2	Control	NA	PP	Summary	Outcome	Satiety	Fullness question	Fullness question AUC 5h	Fullness AUC 5hrs	NA		NA		10	Mean	min x mm	NA	NA	NA	NA	NA	SD	mm per min	NA	NA	NA	NA	NA	NA	NA	NA	NA
2	Wien 2013	Intervention	NCT01271829	Figure 2	Control	NA	PP	Summary	Outcome	Satiety	Hunger question	Hunger question AUC 5h	Hungry AUC 5hrs	NA		NA		10	Mean	min x mm	NA	NA	NA	NA	NA	SD	mm per min	NA	NA	NA	NA	NA	NA	NA	NA	NA
2	Wien 2013	Intervention	NCT01271829	Figure 2	Control	NA	PP	Summary	Outcome	Satiety	Intake question	Intake question AUC 5h	How much AUC 5hrs	NA		NA		10	Mean	min x mm	NA	NA	NA	NA	NA	SD	mm per min	NA	NA	NA	NA	NA	NA	NA	NA	NA
2	Wien 2013	Intervention	NCT01271829	Figure 2	Control	NA	PP	Summary	Outcome	Satiety	Satisfaction question	Satisfaction question AUC 5h	Satisfied AUC 5hrs	NA		NA		10	Mean	min x mm	NA	NA	NA	NA	NA	SD	mm per min	NA	NA	NA	NA	NA	NA	NA	NA	NA
2	Wien 2013	Intervention	NCT01271829	Results section	All	NA	PP	Summary	Subject Characteristics	Age	Age	Age	Age	NA		NA		26	Mean	years	40.8	2.16	11	29.8	51.8	SD	years	40.8	40	40	40	2.15728	11	29.8	51.8	NA
2	Wien 2013	Intervention	NCT01271829	Results section	All	NA	PP	Summary	Subject Characteristics	Anthropometry	BMI	BMI	BMI	NA		NA		26	Mean	kg/m^2	28.1	0.47	2.4	25.7	30.5	SD	kg/m^2	28.1	28	25	20	0.470679	2.4	25.7	30.5	NA
2	Wien 2013	Intervention	NCT01271829	Results section	All	NA	PP	Summary	Subject Characteristics	Sex	Sex	Female	Female	NA		NA		26	Count	Count	16					NA	Count	16	16	15	10					NA
2	Wien 2013	Intervention	NCT01271829	Results section	All	NA	PP	Summary	Subject Characteristics	Sex	Sex	Female	Female	NA		NA		26	Percentage	%	61.5385					NA	%	61.5385	61	60	60					NA
2	Wien 2013	Intervention	NCT01271829	Results section	All	NA	PP	Summary	Subject Characteristics	Sex	Sex	Male	Male	NA		NA		26	Count	Count	10					NA	Count	10	10	10	10					NA
2	Wien 2013	Intervention	NCT01271829	Results section	All	NA	PP	Summary	Subject Characteristics	Sex	Sex	Male	Male	NA		NA		26	Percentage	%	38.4615					NA	%	38.4615	38	35	30					NA
2	Wien 2013	Intervention	NCT01271829	Results section	Avocado added	NA	Planned	Summary	Dietary	Avocado intake	Avocado intake	Avocado intake	Avocado intake	NA		NA		26	Average	g per test meal	67.5			50	90	min,max	g/test meal	67.5	67	65	60			50	90	NA
2	Wien 2013	Intervention	NCT01271829	Results section	Avocado inclusive	NA	Planned	Summary	Dietary	Avocado intake	Avocado intake	Avocado intake	Avocado intake	NA		NA		26	Average	g per test meal	67.5			50	90	min,max	g/test meal	67.5	67	65	60			50	90	NA
2	Wien 2013	Intervention	NCT01271829	Results section	Control	NA	Planned	Summary	Dietary	Avocado intake	Avocado intake	Avocado intake	Avocado intake	NA		NA		26	Average	g per test meal	0					NA	g/test meal	0	0	0	0					NA
2	Wien 2013	Intervention	NCT01271829	Table 2	Avocado added	NA	PP	Summary	Outcome	Satiety	Desire question	Desire question AUC 3h	Desire question AUC 3hrs	NA		NA		7	Mean	mm x min	NA	NA	NA	NA	NA	SD	mm per min	NA	NA	NA	NA	NA	NA	NA	NA	NA
2	Wien 2013	Intervention	NCT01271829	Table 2	Avocado added	NA	PP	Summary	Outcome	Satiety	Fullness question	Fullness question AUC 3h	Fullness question AUC 3hrs	NA		NA		7	Mean	mm x min	NA	NA	NA	NA	NA	SD	mm per min	NA	NA	NA	NA	NA	NA	NA	NA	NA
2	Wien 2013	Intervention	NCT01271829	Table 2	Avocado added	NA	PP	Summary	Outcome	Satiety	Hunger question	Hunger question AUC 3h	Hunger question AUC 3hrs	NA		NA		7	Mean	mm x min	NA	NA	NA	NA	NA	SD	mm per min	NA	NA	NA	NA	NA	NA	NA	NA	NA
2	Wien 2013	Intervention	NCT01271829	Table 2	Avocado added	NA	PP	Summary	Outcome	Satiety	Intake question	Intake question AUC 3h	Intake question AUC 3hrs	NA		NA		7	Mean	mm x min	NA	NA	NA	NA	NA	SD	mm per min	NA	NA	NA	NA	NA	NA	NA	NA	NA
2	Wien 2013	Intervention	NCT01271829	Table 2	Avocado added	NA	PP	Summary	Outcome	Satiety	Satisfaction question	Satisfaction question AUC 3h	Satisfaction question AUC 3hrs	NA		NA		7	Mean	mm x min	NA	NA	NA	NA	NA	SD	mm per min	NA	NA	NA	NA	NA	NA	NA	NA	NA
2	Wien 2013	Intervention	NCT01271829	Table 2	Avocado inclusive	NA	PP	Summary	Outcome	Satiety	Desire question	Desire question AUC 3h	Desire question AUC 3hrs	NA		NA		9	Mean	mm x min	NA	NA	NA	NA	NA	SD	mm per min	NA	NA	NA	NA	NA	NA	NA	NA	NA
2	Wien 2013	Intervention	NCT01271829	Table 2	Avocado inclusive	NA	PP	Summary	Outcome	Satiety	Fullness question	Fullness question AUC 3h	Fullness question AUC 3hrs	NA		NA		9	Mean	mm x min	NA	NA	NA	NA	NA	SD	mm per min	NA	NA	NA	NA	NA	NA	NA	NA	NA
2	Wien 2013	Intervention	NCT01271829	Table 2	Avocado inclusive	NA	PP	Summary	Outcome	Satiety	Hunger question	Hunger question AUC 3h	Hunger question AUC 3hrs	NA		NA		9	Mean	mm x min	NA	NA	NA	NA	NA	SD	mm per min	NA	NA	NA	NA	NA	NA	NA	NA	NA
2	Wien 2013	Intervention	NCT01271829	Table 2	Avocado inclusive	NA	PP	Summary	Outcome	Satiety	Intake question	Intake question AUC 3h	Intake question AUC 3hrs	NA		NA		9	Mean	mm x min	NA	NA	NA	NA	NA	SD	mm per min	NA	NA	NA	NA	NA	NA	NA	NA	NA
2	Wien 2013	Intervention	NCT01271829	Table 2	Avocado inclusive	NA	PP	Summary	Outcome	Satiety	Satisfaction question	Satisfaction question AUC 3h	Satisfaction question AUC 3hrs	NA		NA		9	Mean	mm x min	NA	NA	NA	NA	NA	SD	mm per min	NA	NA	NA	NA	NA	NA	NA	NA	NA
2	Wien 2013	Intervention	NCT01271829	Table 2	Control	NA	PP	Summary	Outcome	Satiety	Desire question	Desire question AUC 3h	Desire question AUC 3hrs	NA		NA		10	Mean	mm x min	NA	NA	NA	NA	NA	SD	mm per min	NA	NA	NA	NA	NA	NA	NA	NA	NA
2	Wien 2013	Intervention	NCT01271829	Table 2	Control	NA	PP	Summary	Outcome	Satiety	Fullness question	Fullness question AUC 3h	Fullness question AUC 3hrs	NA		NA		10	Mean	mm x min	NA	NA	NA	NA	NA	SD	mm per min	NA	NA	NA	NA	NA	NA	NA	NA	NA
2	Wien 2013	Intervention	NCT01271829	Table 2	Control	NA	PP	Summary	Outcome	Satiety	Hunger question	Hunger question AUC 3h	Hunger question AUC 3hrs	NA		NA		10	Mean	mm x min	NA	NA	NA	NA	NA	SD	mm per min	NA	NA	NA	NA	NA	NA	NA	NA	NA
2	Wien 2013	Intervention	NCT01271829	Table 2	Control	NA	PP	Summary	Outcome	Satiety	Intake question	Intake question AUC 3h	Intake question AUC 3hrs	NA		NA		10	Mean	mm x min	NA	NA	NA	NA	NA	SD	mm per min	NA	NA	NA	NA	NA	NA	NA	NA	NA
2	Wien 2013	Intervention	NCT01271829	Table 2	Control	NA	PP	Summary	Outcome	Satiety	Satisfaction question	Satisfaction question AUC 3h	Satisfaction question AUC 3hrs	NA		NA		10	Mean	mm x min	NA	NA	NA	NA	NA	SD	mm per min	NA	NA	NA	NA	NA	NA	NA	NA	NA
3	Thompson 2021	Intervention	Persea americana for Total Health (PATH) Study (NCT02740439)	Figure 2	Control	NA	PP	Summary	Outcome	Microbiome	Faith phylogenetic diversity	Faith phylogenetic diversity	Faith phylogenetic diversity	Fecal	12	weeks	12	54	NA	NA	NA	NA	NA	NA	NA	NA	NA	NA	NA	NA	NA	NA	NA	NA	NA	NA
3	Thompson 2021	Intervention	Persea americana for Total Health (PATH) Study (NCT02740439)	Figure 2	Treatment	NA	PP	Summary	Outcome	Microbiome	Faith phylogenetic diversity	Faith phylogenetic diversity	Faith phylogenetic diversity	Fecal	12	weeks	12	55	NA	NA	NA	NA	NA	NA	NA	NA	NA	NA	NA	NA	NA	NA	NA	NA	NA	NA
3	Thompson 2021	Intervention	Persea americana for Total Health (PATH) Study (NCT02740439)	Methods section	Control	NA	Planned	Summary	Dietary	Avocado intake	Avocado intake	Avocado intake	Avocado intake	NA		NA		54	Absolute value	g/d	0					NA	g/d	0	0	0	0					NA
3	Thompson 2021	Intervention	Persea americana for Total Health (PATH) Study (NCT02740439)	Methods section	Treatment	Female	Planned	Summary	Dietary	Avocado intake	Avocado intake	Avocado intake	Avocado intake	NA		NA		36	Absolute value	g/d	140					NA	g/d	140	140	140	140					NA
3	Thompson 2021	Intervention	Persea americana for Total Health (PATH) Study (NCT02740439)	Methods section	Treatment	Male	Planned	Summary	Dietary	Avocado intake	Avocado intake	Avocado intake	Avocado intake	NA		NA		19	Absolute value	g/d	175					NA	g/d	175	175	175	170					NA
3	Thompson 2021	Intervention	Persea americana for Total Health (PATH) Study (NCT02740439)	Supp Fig 3	Control	NA	ITT	Summary	Outcome	Fecal acids	Acetate	Acetate	Acetate	Fecal	12	weeks	12	78	Mean	umol/g	NA	NA	NA	NA	NA	SD	μmol/g	NA	NA	NA	NA	NA	NA	NA	NA	NA
3	Thompson 2021	Intervention	Persea americana for Total Health (PATH) Study (NCT02740439)	Supp Fig 3	Control	NA	ITT	Summary	Outcome	Fecal acids	Butyrate	Butyrate	Butyrate	Fecal	12	weeks	12	78	Mean	umol/g	NA	NA	NA	NA	NA	SD	μmol/g	NA	NA	NA	NA	NA	NA	NA	NA	NA
3	Thompson 2021	Intervention	Persea americana for Total Health (PATH) Study (NCT02740439)	Supp Fig 3	Control	NA	ITT	Summary	Outcome	Fecal acids	Propionate	Propionate	Propionate	Fecal	12	weeks	12	78	Mean	umol/g	NA	NA	NA	NA	NA	SD	μmol/g	NA	NA	NA	NA	NA	NA	NA	NA	NA
3	Thompson 2021	Intervention	Persea americana for Total Health (PATH) Study (NCT02740439)	Supp Fig 3	Control	NA	ITT	Summary	Outcome	Fecal acids	Total SCFA	Total SCFA	Total SCFA	Fecal	12	weeks	12	78	Mean	umol/g	NA	NA	NA	NA	NA	SD	μmol/g	NA	NA	NA	NA	NA	NA	NA	NA	NA
3	Thompson 2021	Intervention	Persea americana for Total Health (PATH) Study (NCT02740439)	Supp Fig 3	Treatment	NA	ITT	Summary	Outcome	Fecal acids	Acetate	Acetate	Acetate	Fecal	12	weeks	12	79	Mean	umol/g	NA	NA	NA	NA	NA	SD	μmol/g	NA	NA	NA	NA	NA	NA	NA	NA	NA
3	Thompson 2021	Intervention	Persea americana for Total Health (PATH) Study (NCT02740439)	Supp Fig 3	Treatment	NA	ITT	Summary	Outcome	Fecal acids	Butyrate	Butyrate	Butyrate	Fecal	12	weeks	12	79	Mean	umol/g	NA	NA	NA	NA	NA	SD	μmol/g	NA	NA	NA	NA	NA	NA	NA	NA	NA
3	Thompson 2021	Intervention	Persea americana for Total Health (PATH) Study (NCT02740439)	Supp Fig 3	Treatment	NA	ITT	Summary	Outcome	Fecal acids	Propionate	Propionate	Propionate	Fecal	12	weeks	12	79	Mean	umol/g	NA	NA	NA	NA	NA	SD	μmol/g	NA	NA	NA	NA	NA	NA	NA	NA	NA
3	Thompson 2021	Intervention	Persea americana for Total Health (PATH) Study (NCT02740439)	Supp Fig 3	Treatment	NA	ITT	Summary	Outcome	Fecal acids	Total SCFA	Total SCFA	Total SCFA	Fecal	12	weeks	12	79	Mean	umol/g	NA	NA	NA	NA	NA	SD	μmol/g	NA	NA	NA	NA	NA	NA	NA	NA	NA
3	Thompson 2021	Intervention	Persea americana for Total Health (PATH) Study (NCT02740439)	Supp Table 3	Control	NA	ITT	Summary	Dietary	Macronutrients	Carbohydrates	Carbohydrates	Total CHO	NA	12	weeks	12	78	Mean	g/d	NA	NA	NA	NA	NA	SD	g/d	NA	NA	NA	NA	NA	NA	NA	NA	NA
3	Thompson 2021	Intervention	Persea americana for Total Health (PATH) Study (NCT02740439)	Supp Table 3	Control	NA	ITT	Summary	Dietary	Energy	Energy	Energy	Total energy	NA	12	weeks	12	78	Mean	kcal/d	NA	NA	NA	NA	NA	SD	kcal/d	NA	NA	NA	NA	NA	NA	NA	NA	NA
3	Thompson 2021	Intervention	Persea americana for Total Health (PATH) Study (NCT02740439)	Supp Table 3	Control	NA	ITT	Summary	Dietary	Macronutrients	Fat	Fat	Total fat	NA	12	weeks	12	78	Mean	g/d	NA	NA	NA	NA	NA	SD	g/d	NA	NA	NA	NA	NA	NA	NA	NA	NA
3	Thompson 2021	Intervention	Persea americana for Total Health (PATH) Study (NCT02740439)	Supp Table 3	Control	NA	ITT	Summary	Dietary	Fiber	Fiber	Fiber	Total DF	NA	12	weeks	12	78	Mean	g/d	NA	NA	NA	NA	NA	SD	g/d	NA	NA	NA	NA	NA	NA	NA	NA	NA
3	Thompson 2021	Intervention	Persea americana for Total Health (PATH) Study (NCT02740439)	Supp Table 3	Control	NA	ITT	Summary	Dietary	Fiber	Fiber	Insoluble Fiber	Insoluble DF	NA	12	weeks	12	78	Mean	g/d	NA	NA	NA	NA	NA	SD	g/d	NA	NA	NA	NA	NA	NA	NA	NA	NA
3	Thompson 2021	Intervention	Persea americana for Total Health (PATH) Study (NCT02740439)	Supp Table 3	Control	NA	ITT	Summary	Dietary	Fiber	Fiber	Pectins	Pectins	NA	12	weeks	12	78	Mean	g/d	NA	NA	NA	NA	NA	SD	g/d	NA	NA	NA	NA	NA	NA	NA	NA	NA
3	Thompson 2021	Intervention	Persea americana for Total Health (PATH) Study (NCT02740439)	Supp Table 3	Control	NA	ITT	Summary	Dietary	Fiber	Fiber	Soluble Fiber	Soluble DF	NA	12	weeks	12	78	Mean	g/d	NA	NA	NA	NA	NA	SD	g/d	NA	NA	NA	NA	NA	NA	NA	NA	NA
3	Thompson 2021	Intervention	Persea americana for Total Health (PATH) Study (NCT02740439)	Supp Table 3	Control	NA	ITT	Summary	Dietary	Fatty acids	MUFA	MUFA	MUFA	NA	12	weeks	12	78	Mean	g/d	NA	NA	NA	NA	NA	SD	g/d	NA	NA	NA	NA	NA	NA	NA	NA	NA
3	Thompson 2021	Intervention	Persea americana for Total Health (PATH) Study (NCT02740439)	Supp Table 3	Control	NA	ITT	Summary	Dietary	Macronutrients	Protein	Protein	Total PRO	NA	12	weeks	12	78	Mean	g/d	NA	NA	NA	NA	NA	SD	g/d	NA	NA	NA	NA	NA	NA	NA	NA	NA
3	Thompson 2021	Intervention	Persea americana for Total Health (PATH) Study (NCT02740439)	Supp Table 3	Control	NA	ITT	Summary	Dietary	Fatty acids	PUFA	PUFA	PUFA	NA	12	weeks	12	78	Mean	g/d	NA	NA	NA	NA	NA	SD	g/d	NA	NA	NA	NA	NA	NA	NA	NA	NA
3	Thompson 2021	Intervention	Persea americana for Total Health (PATH) Study (NCT02740439)	Supp Table 3	Control	NA	ITT	Summary	Dietary	Fatty acids	SFA	SFA	Saturated fat	NA	12	weeks	12	78	Mean	g/d	NA	NA	NA	NA	NA	SD	g/d	NA	NA	NA	NA	NA	NA	NA	NA	NA
3	Thompson 2021	Intervention	Persea americana for Total Health (PATH) Study (NCT02740439)	Supp Table 3	Treatment	NA	ITT	Summary	Dietary	Macronutrients	Carbohydrates	Carbohydrates	Total CHO	NA	12	weeks	12	78	Mean	g/d	NA	NA	NA	NA	NA	SD	g/d	NA	NA	NA	NA	NA	NA	NA	NA	NA
3	Thompson 2021	Intervention	Persea americana for Total Health (PATH) Study (NCT02740439)	Supp Table 3	Treatment	NA	ITT	Summary	Dietary	Energy	Energy	Energy	Total energy	NA	12	weeks	12	78	Mean	kcal/d	NA	NA	NA	NA	NA	SD	kcal/d	NA	NA	NA	NA	NA	NA	NA	NA	NA
3	Thompson 2021	Intervention	Persea americana for Total Health (PATH) Study (NCT02740439)	Supp Table 3	Treatment	NA	ITT	Summary	Dietary	Macronutrients	Fat	Fat	Total fat	NA	12	weeks	12	78	Mean	g/d	NA	NA	NA	NA	NA	SD	g/d	NA	NA	NA	NA	NA	NA	NA	NA	NA
3	Thompson 2021	Intervention	Persea americana for Total Health (PATH) Study (NCT02740439)	Supp Table 3	Treatment	NA	ITT	Summary	Dietary	Fiber	Fiber	Fiber	Total DF	NA	12	weeks	12	78	Mean	g/d	NA	NA	NA	NA	NA	SD	g/d	NA	NA	NA	NA	NA	NA	NA	NA	NA
3	Thompson 2021	Intervention	Persea americana for Total Health (PATH) Study (NCT02740439)	Supp Table 3	Treatment	NA	ITT	Summary	Dietary	Fiber	Fiber	Insoluble Fiber	Insoluble DF	NA	12	weeks	12	78	Mean	g/d	NA	NA	NA	NA	NA	SD	g/d	NA	NA	NA	NA	NA	NA	NA	NA	NA
3	Thompson 2021	Intervention	Persea americana for Total Health (PATH) Study (NCT02740439)	Supp Table 3	Treatment	NA	ITT	Summary	Dietary	Fiber	Fiber	Pectins	Pectins	NA	12	weeks	12	78	Mean	g/d	NA	NA	NA	NA	NA	SD	g/d	NA	NA	NA	NA	NA	NA	NA	NA	NA
3	Thompson 2021	Intervention	Persea americana for Total Health (PATH) Study (NCT02740439)	Supp Table 3	Treatment	NA	ITT	Summary	Dietary	Fiber	Fiber	Soluble Fiber	Soluble DF	NA	12	weeks	12	78	Mean	g/d	NA	NA	NA	NA	NA	SD	g/d	NA	NA	NA	NA	NA	NA	NA	NA	NA
3	Thompson 2021	Intervention	Persea americana for Total Health (PATH) Study (NCT02740439)	Supp Table 3	Treatment	NA	ITT	Summary	Dietary	Fatty acids	MUFA	MUFA	MUFA	NA	12	weeks	12	78	Mean	g/d	NA	NA	NA	NA	NA	SD	g/d	NA	NA	NA	NA	NA	NA	NA	NA	NA
3	Thompson 2021	Intervention	Persea americana for Total Health (PATH) Study (NCT02740439)	Supp Table 3	Treatment	NA	ITT	Summary	Dietary	Macronutrients	Protein	Protein	Total PRO	NA	12	weeks	12	78	Mean	g/d	NA	NA	NA	NA	NA	SD	g/d	NA	NA	NA	NA	NA	NA	NA	NA	NA
3	Thompson 2021	Intervention	Persea americana for Total Health (PATH) Study (NCT02740439)	Supp Table 3	Treatment	NA	ITT	Summary	Dietary	Fatty acids	PUFA	PUFA	PUFA	NA	12	weeks	12	78	Mean	g/d	NA	NA	NA	NA	NA	SD	g/d	NA	NA	NA	NA	NA	NA	NA	NA	NA
3	Thompson 2021	Intervention	Persea americana for Total Health (PATH) Study (NCT02740439)	Supp Table 3	Treatment	NA	ITT	Summary	Dietary	Fatty acids	SFA	SFA	Saturated fat	NA	12	weeks	12	78	Mean	g/d	NA	NA	NA	NA	NA	SD	g/d	NA	NA	NA	NA	NA	NA	NA	NA	NA
3	Thompson 2021	Intervention	Persea americana for Total Health (PATH) Study (NCT02740439)	Supplemental Table 1	Control	NA	PP	Summary	Outcome	Bile acids	Chenodeoxycholic acid	Chenodeoxycholic acid	Chenodeoxycholic acid	Fecal	12	weeks	12	44	Mean	ug/g dry feces	NA	NA	NA	NA	NA	SD	μg/g dry feces	NA	NA	NA	NA	NA	NA	NA	NA	NA
3	Thompson 2021	Intervention	Persea americana for Total Health (PATH) Study (NCT02740439)	Supplemental Table 1	Control	NA	PP	Summary	Outcome	Bile acids	Cholic acid	Cholic acid	Cholic acid	Fecal	12	weeks	12	44	Mean	ug/g dry feces	NA	NA	NA	NA	NA	SD	μg/g dry feces	NA	NA	NA	NA	NA	NA	NA	NA	NA
3	Thompson 2021	Intervention	Persea americana for Total Health (PATH) Study (NCT02740439)	Supplemental Table 1	Control	NA	PP	Summary	Outcome	Bile acids	Deoxycholic acid	Deoxycholic acid	Deoxycholic acid	Fecal	12	weeks	12	44	Mean	ug/g dry feces	NA	NA	NA	NA	NA	SD	μg/g dry feces	NA	NA	NA	NA	NA	NA	NA	NA	NA
3	Thompson 2021	Intervention	Persea americana for Total Health (PATH) Study (NCT02740439)	Supplemental Table 1	Control	NA	PP	Summary	Outcome	Bile acids	Lithocholic acid	Lithocholic acid	Lithocholic acid	Fecal	12	weeks	12	44	Mean	ug/g dry feces	NA	NA	NA	NA	NA	SD	μg/g dry feces	NA	NA	NA	NA	NA	NA	NA	NA	NA
3	Thompson 2021	Intervention	Persea americana for Total Health (PATH) Study (NCT02740439)	Supplemental Table 1	Control	NA	PP	Summary	Outcome	Bile acids	Primary bile acid sum	Primary bile acid sum	Primary bile acid sum	Fecal	12	weeks	12	44	Mean	ug/g dry feces	NA	NA	NA	NA	NA	SD	μg/g dry feces	NA	NA	NA	NA	NA	NA	NA	NA	NA
3	Thompson 2021	Intervention	Persea americana for Total Health (PATH) Study (NCT02740439)	Supplemental Table 1	Control	NA	PP	Summary	Outcome	Bile acids	Secondary bile acid sum	Secondary bile acid sum	Secondary bile acid sum	Fecal	12	weeks	12	44	Mean	ug/g dry feces	NA	NA	NA	NA	NA	SD	μg/g dry feces	NA	NA	NA	NA	NA	NA	NA	NA	NA
3	Thompson 2021	Intervention	Persea americana for Total Health (PATH) Study (NCT02740439)	Supplemental Table 1	Control	NA	PP	Summary	Outcome	Bile acids	Total bile acid sum	Total bile acid sum	Total bile acid sum	Fecal	12	weeks	12	44	Mean	ug/g dry feces	NA	NA	NA	NA	NA	SD	μg/g dry feces	NA	NA	NA	NA	NA	NA	NA	NA	NA
3	Thompson 2021	Intervention	Persea americana for Total Health (PATH) Study (NCT02740439)	Supplemental Table 1	Treatment	NA	PP	Summary	Outcome	Bile acids	Chenodeoxycholic acid	Chenodeoxycholic acid	Chenodeoxycholic acid	Fecal	12	weeks	12	46	Mean	ug/g dry feces	NA	NA	NA	NA	NA	SD	μg/g dry feces	NA	NA	NA	NA	NA	NA	NA	NA	NA
3	Thompson 2021	Intervention	Persea americana for Total Health (PATH) Study (NCT02740439)	Supplemental Table 1	Treatment	NA	PP	Summary	Outcome	Bile acids	Cholic acid	Cholic acid	Cholic acid	Fecal	12	weeks	12	46	Mean	ug/g dry feces	NA	NA	NA	NA	NA	SD	μg/g dry feces	NA	NA	NA	NA	NA	NA	NA	NA	NA
3	Thompson 2021	Intervention	Persea americana for Total Health (PATH) Study (NCT02740439)	Supplemental Table 1	Treatment	NA	PP	Summary	Outcome	Bile acids	Deoxycholic acid	Deoxycholic acid	Deoxycholic acid	Fecal	12	weeks	12	46	Mean	ug/g dry feces	NA	NA	NA	NA	NA	SD	μg/g dry feces	NA	NA	NA	NA	NA	NA	NA	NA	NA
3	Thompson 2021	Intervention	Persea americana for Total Health (PATH) Study (NCT02740439)	Supplemental Table 1	Treatment	NA	PP	Summary	Outcome	Bile acids	Lithocholic acid	Lithocholic acid	Lithocholic acid	Fecal	12	weeks	12	46	Mean	ug/g dry feces	NA	NA	NA	NA	NA	SD	μg/g dry feces	NA	NA	NA	NA	NA	NA	NA	NA	NA
3	Thompson 2021	Intervention	Persea americana for Total Health (PATH) Study (NCT02740439)	Supplemental Table 1	Treatment	NA	PP	Summary	Outcome	Bile acids	Primary bile acid sum	Primary bile acid sum	Primary bile acid sum	Fecal	12	weeks	12	46	Mean	ug/g dry feces	NA	NA	NA	NA	NA	SD	μg/g dry feces	NA	NA	NA	NA	NA	NA	NA	NA	NA
3	Thompson 2021	Intervention	Persea americana for Total Health (PATH) Study (NCT02740439)	Supplemental Table 1	Treatment	NA	PP	Summary	Outcome	Bile acids	Secondary bile acid sum	Secondary bile acid sum	Secondary bile acid sum	Fecal	12	weeks	12	46	Mean	ug/g dry feces	NA	NA	NA	NA	NA	SD	μg/g dry feces	NA	NA	NA	NA	NA	NA	NA	NA	NA
3	Thompson 2021	Intervention	Persea americana for Total Health (PATH) Study (NCT02740439)	Supplemental Table 1	Treatment	NA	PP	Summary	Outcome	Bile acids	Total bile acid sum	Total bile acid sum	Total bile acid sum	Fecal	12	weeks	12	46	Mean	ug/g dry feces	NA	NA	NA	NA	NA	SD	μg/g dry feces	NA	NA	NA	NA	NA	NA	NA	NA	NA
3	Thompson 2021	Intervention	Persea americana for Total Health (PATH) Study (NCT02740439)	Supplemental Table 2	Control	NA	PP	Summary	Outcome	Fecal acids	Arachidic acid	Arachidic acid	Arachidic acid	Fecal	12	weeks	12	19	Mean	mg/100mg dry feces	NA	NA	NA	NA	NA	SD	mg/100mg dry feces	NA	NA	NA	NA	NA	NA	NA	NA	NA
3	Thompson 2021	Intervention	Persea americana for Total Health (PATH) Study (NCT02740439)	Supplemental Table 2	Control	NA	PP	Summary	Outcome	Fecal acids	Behenic acid	Behenic acid	Behenic acid	Fecal	12	weeks	12	19	Mean	mg/100mg dry feces	NA	NA	NA	NA	NA	SD	mg/100mg dry feces	NA	NA	NA	NA	NA	NA	NA	NA	NA
3	Thompson 2021	Intervention	Persea americana for Total Health (PATH) Study (NCT02740439)	Supplemental Table 2	Control	NA	PP	Summary	Outcome	Fecal acids	Lignoceric acid	Lignoceric acid	Lignoceric acid	Fecal	12	weeks	12	19	Mean	mg/100mg dry feces	NA	NA	NA	NA	NA	SD	mg/100mg dry feces	NA	NA	NA	NA	NA	NA	NA	NA	NA
3	Thompson 2021	Intervention	Persea americana for Total Health (PATH) Study (NCT02740439)	Supplemental Table 2	Control	NA	PP	Summary	Outcome	Fecal acids	Palmitic acid	Palmitic acid	Palmitic acid	Fecal	12	weeks	12	19	Mean	mg/100mg dry feces	NA	NA	NA	NA	NA	SD	mg/100mg dry feces	NA	NA	NA	NA	NA	NA	NA	NA	NA
3	Thompson 2021	Intervention	Persea americana for Total Health (PATH) Study (NCT02740439)	Supplemental Table 2	Control	NA	PP	Summary	Outcome	Fecal acids	Palmitoleic acid	Palmitoleic acid	Palmitoleic acid	Fecal	12	weeks	12	19	Mean	mg/100mg dry feces	NA	NA	NA	NA	NA	SD	mg/100mg dry feces	NA	NA	NA	NA	NA	NA	NA	NA	NA
3	Thompson 2021	Intervention	Persea americana for Total Health (PATH) Study (NCT02740439)	Supplemental Table 2	Control	NA	PP	Summary	Outcome	Fecal acids	Stearic acid	Stearic acid	Stearic acid	Fecal	12	weeks	12	19	Mean	mg/100mg dry feces	NA	NA	NA	NA	NA	SD	mg/100mg dry feces	NA	NA	NA	NA	NA	NA	NA	NA	NA
3	Thompson 2021	Intervention	Persea americana for Total Health (PATH) Study (NCT02740439)	Supplemental Table 2	Control	NA	PP	Summary	Outcome	Fecal acids	Vaccenic acid	Vaccenic acid	Vaccenic acid	Fecal	12	weeks	12	19	Mean	mg/100mg dry feces	NA	NA	NA	NA	NA	SD	mg/100mg dry feces	NA	NA	NA	NA	NA	NA	NA	NA	NA
3	Thompson 2021	Intervention	Persea americana for Total Health (PATH) Study (NCT02740439)	Supplemental Table 2	Treatment	NA	PP	Summary	Outcome	Fecal acids	Arachidic acid	Arachidic acid	Arachidic acid	Fecal	12	weeks	12	27	Mean	mg/100mg dry feces	NA	NA	NA	NA	NA	SD	mg/100mg dry feces	NA	NA	NA	NA	NA	NA	NA	NA	NA
3	Thompson 2021	Intervention	Persea americana for Total Health (PATH) Study (NCT02740439)	Supplemental Table 2	Treatment	NA	PP	Summary	Outcome	Fecal acids	Behenic acid	Behenic acid	Behenic acid	Fecal	12	weeks	12	27	Mean	mg/100mg dry feces	NA	NA	NA	NA	NA	SD	mg/100mg dry feces	NA	NA	NA	NA	NA	NA	NA	NA	NA
3	Thompson 2021	Intervention	Persea americana for Total Health (PATH) Study (NCT02740439)	Supplemental Table 2	Treatment	NA	PP	Summary	Outcome	Fecal acids	Lignoceric acid	Lignoceric acid	Lignoceric acid	Fecal	12	weeks	12	27	Mean	mg/100mg dry feces	NA	NA	NA	NA	NA	SD	mg/100mg dry feces	NA	NA	NA	NA	NA	NA	NA	NA	NA
3	Thompson 2021	Intervention	Persea americana for Total Health (PATH) Study (NCT02740439)	Supplemental Table 2	Treatment	NA	PP	Summary	Outcome	Fecal acids	Palmitic acid	Palmitic acid	Palmitic acid	Fecal	12	weeks	12	27	Mean	mg/100mg dry feces	NA	NA	NA	NA	NA	SD	mg/100mg dry feces	NA	NA	NA	NA	NA	NA	NA	NA	NA
3	Thompson 2021	Intervention	Persea americana for Total Health (PATH) Study (NCT02740439)	Supplemental Table 2	Treatment	NA	PP	Summary	Outcome	Fecal acids	Palmitoleic acid	Palmitoleic acid	Palmitoleic acid	Fecal	12	weeks	12	27	Mean	mg/100mg dry feces	NA	NA	NA	NA	NA	SD	mg/100mg dry feces	NA	NA	NA	NA	NA	NA	NA	NA	NA
3	Thompson 2021	Intervention	Persea americana for Total Health (PATH) Study (NCT02740439)	Supplemental Table 2	Treatment	NA	PP	Summary	Outcome	Fecal acids	Stearic acid	Stearic acid	Stearic acid	Fecal	12	weeks	12	27	Mean	mg/100mg dry feces	NA	NA	NA	NA	NA	SD	mg/100mg dry feces	NA	NA	NA	NA	NA	NA	NA	NA	NA
3	Thompson 2021	Intervention	Persea americana for Total Health (PATH) Study (NCT02740439)	Supplemental Table 2	Treatment	NA	PP	Summary	Outcome	Fecal acids	Vaccenic acid	Vaccenic acid	Vaccenic acid	Fecal	12	weeks	12	27	Mean	mg/100mg dry feces	NA	NA	NA	NA	NA	SD	mg/100mg dry feces	NA	NA	NA	NA	NA	NA	NA	NA	NA
3	Thompson 2021	Intervention	Persea americana for Total Health (PATH) Study (NCT02740439)	Supplemental Table 4	Control	NA	ITT	Summary	Outcome	Microbiome	Gut microbiota	Fecal bacteria	Fecal bacteria	Fecal	12	weeks	12	78	NA	relative abundance	NA	NA	NA	NA	NA	NA	relative abundance	NA	NA	NA	NA	NA	NA	NA	NA	NA
3	Thompson 2021	Intervention	Persea americana for Total Health (PATH) Study (NCT02740439)	Supplemental Table 4	Treatment	NA	ITT	Summary	Outcome	Microbiome	Gut microbiota	Fecal bacteria	Fecal bacteria	Fecal	12	weeks	12	79	NA	relative abundance	NA	NA	NA	NA	NA	NA	relative abundance	NA	NA	NA	NA	NA	NA	NA	NA	NA
3	Thompson 2021	Intervention	Persea americana for Total Health (PATH) Study (NCT02740439)	Supplemental Table 5	Control	NA	ITT	Summary	Outcome	Bile acids	Chenodeoxycholic acid	Chenodeoxycholic acid	Chenodeoxycholic acid	Fecal	12	weeks	12	62	Mean	ug/g dry feces	NA	NA	NA	NA	NA	SD	μg/g dry feces	NA	NA	NA	NA	NA	NA	NA	NA	NA
3	Thompson 2021	Intervention	Persea americana for Total Health (PATH) Study (NCT02740439)	Supplemental Table 5	Control	NA	ITT	Summary	Outcome	Bile acids	Cholic acid	Cholic acid	Cholic acid	Fecal	12	weeks	12	62	Mean	ug/g dry feces	NA	NA	NA	NA	NA	SD	μg/g dry feces	NA	NA	NA	NA	NA	NA	NA	NA	NA
3	Thompson 2021	Intervention	Persea americana for Total Health (PATH) Study (NCT02740439)	Supplemental Table 5	Control	NA	ITT	Summary	Outcome	Bile acids	Deoxycholic acid	Deoxycholic acid	Deoxycholic acid	Fecal	12	weeks	12	62	Mean	ug/g dry feces	NA	NA	NA	NA	NA	SD	μg/g dry feces	NA	NA	NA	NA	NA	NA	NA	NA	NA
3	Thompson 2021	Intervention	Persea americana for Total Health (PATH) Study (NCT02740439)	Supplemental Table 5	Control	NA	ITT	Summary	Outcome	Bile acids	Lithocholic acid	Lithocholic acid	Lithocholic acid	Fecal	12	weeks	12	62	Mean	ug/g dry feces	NA	NA	NA	NA	NA	SD	μg/g dry feces	NA	NA	NA	NA	NA	NA	NA	NA	NA
3	Thompson 2021	Intervention	Persea americana for Total Health (PATH) Study (NCT02740439)	Supplemental Table 5	Control	NA	ITT	Summary	Outcome	Bile acids	Primary bile acid sum	Primary bile acid sum	Primary bile acid sum	Fecal	12	weeks	12	62	Mean	ug/g dry feces	NA	NA	NA	NA	NA	SD	μg/g dry feces	NA	NA	NA	NA	NA	NA	NA	NA	NA
3	Thompson 2021	Intervention	Persea americana for Total Health (PATH) Study (NCT02740439)	Supplemental Table 5	Control	NA	ITT	Summary	Outcome	Bile acids	Secondary bile acid sum	Secondary bile acid sum	Secondary bile acid sum	Fecal	12	weeks	12	62	Mean	ug/g dry feces	NA	NA	NA	NA	NA	SD	μg/g dry feces	NA	NA	NA	NA	NA	NA	NA	NA	NA
3	Thompson 2021	Intervention	Persea americana for Total Health (PATH) Study (NCT02740439)	Supplemental Table 5	Control	NA	ITT	Summary	Outcome	Bile acids	Total bile acid sum	Total bile acid sum	Total bile acid sum	Fecal	12	weeks	12	62	Mean	ug/g dry feces	NA	NA	NA	NA	NA	SD	μg/g dry feces	NA	NA	NA	NA	NA	NA	NA	NA	NA
3	Thompson 2021	Intervention	Persea americana for Total Health (PATH) Study (NCT02740439)	Supplemental Table 5	Treatment	NA	ITT	Summary	Outcome	Bile acids	Chenodeoxycholic acid	Chenodeoxycholic acid	Chenodeoxycholic acid	Fecal	12	weeks	12	63	Mean	ug/g dry feces	NA	NA	NA	NA	NA	SD	μg/g dry feces	NA	NA	NA	NA	NA	NA	NA	NA	NA
3	Thompson 2021	Intervention	Persea americana for Total Health (PATH) Study (NCT02740439)	Supplemental Table 5	Treatment	NA	ITT	Summary	Outcome	Bile acids	Cholic acid	Cholic acid	Cholic acid	Fecal	12	weeks	12	63	Mean	ug/g dry feces	NA	NA	NA	NA	NA	SD	μg/g dry feces	NA	NA	NA	NA	NA	NA	NA	NA	NA
3	Thompson 2021	Intervention	Persea americana for Total Health (PATH) Study (NCT02740439)	Supplemental Table 5	Treatment	NA	ITT	Summary	Outcome	Bile acids	Deoxycholic acid	Deoxycholic acid	Deoxycholic acid	Fecal	12	weeks	12	63	Mean	ug/g dry feces	NA	NA	NA	NA	NA	SD	μg/g dry feces	NA	NA	NA	NA	NA	NA	NA	NA	NA
3	Thompson 2021	Intervention	Persea americana for Total Health (PATH) Study (NCT02740439)	Supplemental Table 5	Treatment	NA	ITT	Summary	Outcome	Bile acids	Lithocholic acid	Lithocholic acid	Lithocholic acid	Fecal	12	weeks	12	63	Mean	ug/g dry feces	NA	NA	NA	NA	NA	SD	μg/g dry feces	NA	NA	NA	NA	NA	NA	NA	NA	NA
3	Thompson 2021	Intervention	Persea americana for Total Health (PATH) Study (NCT02740439)	Supplemental Table 5	Treatment	NA	ITT	Summary	Outcome	Bile acids	Primary bile acid sum	Primary bile acid sum	Primary bile acid sum	Fecal	12	weeks	12	63	Mean	ug/g dry feces	NA	NA	NA	NA	NA	SD	μg/g dry feces	NA	NA	NA	NA	NA	NA	NA	NA	NA
3	Thompson 2021	Intervention	Persea americana for Total Health (PATH) Study (NCT02740439)	Supplemental Table 5	Treatment	NA	ITT	Summary	Outcome	Bile acids	Secondary bile acid sum	Secondary bile acid sum	Secondary bile acid sum	Fecal	12	weeks	12	63	Mean	ug/g dry feces	NA	NA	NA	NA	NA	SD	μg/g dry feces	NA	NA	NA	NA	NA	NA	NA	NA	NA
3	Thompson 2021	Intervention	Persea americana for Total Health (PATH) Study (NCT02740439)	Supplemental Table 5	Treatment	NA	ITT	Summary	Outcome	Bile acids	Total bile acid sum	Total bile acid sum	Total bile acid sum	Fecal	12	weeks	12	63	Mean	ug/g dry feces	NA	NA	NA	NA	NA	SD	μg/g dry feces	NA	NA	NA	NA	NA	NA	NA	NA	NA
3	Thompson 2021	Intervention	Persea americana for Total Health (PATH) Study (NCT02740439)	Table 2	All	NA	ITT	Summary	Subject Characteristics	Age	Age	Age	Age	NA		NA		157	Mean	years	35	0.5	6.26	28.74	41.26	SD	years	35	35	35	30	0.5	6.26498	28.735	41.265	NA
3	Thompson 2021	Intervention	Persea americana for Total Health (PATH) Study (NCT02740439)	Table 2	All	NA	ITT	Summary	Subject Characteristics	Anthropometry	BMI	BMI	BMI	NA		NA		157	Mean	kg/m^2	32.8	0.5	6.26	26.54	39.06	SD	kg/m^2	32.8	32	30	30	0.5	6.26498	26.535	39.065	NA
3	Thompson 2021	Intervention	Persea americana for Total Health (PATH) Study (NCT02740439)	Table 2	All	NA	ITT	Summary	Subject Characteristics	Anthropometry	Body fat	Subcutaneous abdominal adipose tissue	Subcutaneous abdominal adiposity	NA		NA		157	Mean	g	NA	NA	NA	NA	NA	SD	g	NA	NA	NA	NA	NA	NA	NA	NA	NA
3	Thompson 2021	Intervention	Persea americana for Total Health (PATH) Study (NCT02740439)	Table 2	All	NA	ITT	Summary	Subject Characteristics	Anthropometry	Body fat	Visceral adipose tissue	Visceral abdominal adiposity	NA		NA		157	Mean	g	NA	NA	NA	NA	NA	SD	g	NA	NA	NA	NA	NA	NA	NA	NA	NA
3	Thompson 2021	Intervention	Persea americana for Total Health (PATH) Study (NCT02740439)	Table 2	All	NA	ITT	Summary	Subject Characteristics	Anthropometry	Body weight	Body weight	Body weight	NA		NA		157	Mean	kg	NA	NA	NA	NA	NA	SD	kg	NA	NA	NA	NA	NA	NA	NA	NA	NA
3	Thompson 2021	Intervention	Persea americana for Total Health (PATH) Study (NCT02740439)	Table 2	All	NA	ITT	Summary	Subject Characteristics	Race	Heritage	Hispanic	Hispanic identity	NA		NA		157	Count	Count	NA	NA	NA	NA	NA	NA	Count	NA	NA	NA	NA	NA	NA	NA	NA	NA
3	Thompson 2021	Intervention	Persea americana for Total Health (PATH) Study (NCT02740439)	Table 2	All	NA	ITT	Summary	Subject Characteristics	Race	Heritage	Hispanic	Hispanic identity	NA		NA		157	Percentage	%	NA	NA	NA	NA	NA	NA	%	NA	NA	NA	NA	NA	NA	NA	NA	NA
3	Thompson 2021	Intervention	Persea americana for Total Health (PATH) Study (NCT02740439)	Table 2	All	NA	ITT	Summary	Subject Characteristics	Race	Race	African-American	Race, African American	NA		NA		157	Count	Count	NA	NA	NA	NA	NA	NA	Count	NA	NA	NA	NA	NA	NA	NA	NA	NA
3	Thompson 2021	Intervention	Persea americana for Total Health (PATH) Study (NCT02740439)	Table 2	All	NA	ITT	Summary	Subject Characteristics	Race	Race	African-American	Race, African American	NA		NA		157	Percentage	%	NA	NA	NA	NA	NA	NA	%	NA	NA	NA	NA	NA	NA	NA	NA	NA
3	Thompson 2021	Intervention	Persea americana for Total Health (PATH) Study (NCT02740439)	Table 2	All	NA	ITT	Summary	Subject Characteristics	Race	Race	American Indian or Alaskan Native	Race, American Indian or Alaskan Native	NA		NA		157	Count	Count	NA	NA	NA	NA	NA	NA	Count	NA	NA	NA	NA	NA	NA	NA	NA	NA
3	Thompson 2021	Intervention	Persea americana for Total Health (PATH) Study (NCT02740439)	Table 2	All	NA	ITT	Summary	Subject Characteristics	Race	Race	American Indian or Alaskan Native	Race, American Indian or Alaskan Native	NA		NA		157	Percentage	%	NA	NA	NA	NA	NA	NA	%	NA	NA	NA	NA	NA	NA	NA	NA	NA
3	Thompson 2021	Intervention	Persea americana for Total Health (PATH) Study (NCT02740439)	Table 2	All	NA	ITT	Summary	Subject Characteristics	Race	Race	Asian	Race, Asia	NA		NA		157	Count	Count	NA	NA	NA	NA	NA	NA	Count	NA	NA	NA	NA	NA	NA	NA	NA	NA
3	Thompson 2021	Intervention	Persea americana for Total Health (PATH) Study (NCT02740439)	Table 2	All	NA	ITT	Summary	Subject Characteristics	Race	Race	Asian	Race, Asia	NA		NA		157	Percentage	%	NA	NA	NA	NA	NA	NA	%	NA	NA	NA	NA	NA	NA	NA	NA	NA
3	Thompson 2021	Intervention	Persea americana for Total Health (PATH) Study (NCT02740439)	Table 2	All	NA	ITT	Summary	Subject Characteristics	Race	Race	Caucasian	Race, White	NA		NA		157	Count	Count	NA	NA	NA	NA	NA	NA	Count	NA	NA	NA	NA	NA	NA	NA	NA	NA
3	Thompson 2021	Intervention	Persea americana for Total Health (PATH) Study (NCT02740439)	Table 2	All	NA	ITT	Summary	Subject Characteristics	Race	Race	Caucasian	Race, White	NA		NA		157	Percentage	%	NA	NA	NA	NA	NA	NA	%	NA	NA	NA	NA	NA	NA	NA	NA	NA
3	Thompson 2021	Intervention	Persea americana for Total Health (PATH) Study (NCT02740439)	Table 2	All	NA	ITT	Summary	Subject Characteristics	Race	Race	Multi-racial	Race, Mixed race	NA		NA		157	Count	Count	NA	NA	NA	NA	NA	NA	Count	NA	NA	NA	NA	NA	NA	NA	NA	NA
3	Thompson 2021	Intervention	Persea americana for Total Health (PATH) Study (NCT02740439)	Table 2	All	NA	ITT	Summary	Subject Characteristics	Race	Race	Multi-racial	Race, Mixed race	NA		NA		157	Percentage	%	NA	NA	NA	NA	NA	NA	%	NA	NA	NA	NA	NA	NA	NA	NA	NA
3	Thompson 2021	Intervention	Persea americana for Total Health (PATH) Study (NCT02740439)	Table 2	All	NA	ITT	Summary	Subject Characteristics	Sex	Sex	Female	Women	NA		NA		157	Count	Count	100					NA	Count	100	100	100	100					NA
3	Thompson 2021	Intervention	Persea americana for Total Health (PATH) Study (NCT02740439)	Table 2	All	NA	ITT	Summary	Subject Characteristics	Sex	Sex	Female	Women	NA		NA		157	Percentage	%	63.6943					NA	%	63.6943	63	60	60					NA
3	Thompson 2021	Intervention	Persea americana for Total Health (PATH) Study (NCT02740439)	Table 2	All	NA	ITT	Summary	Subject Characteristics	Sex	Sex	Male	Men	NA		NA		157	Count	Count	57					NA	Count	57	57	55	50					NA
3	Thompson 2021	Intervention	Persea americana for Total Health (PATH) Study (NCT02740439)	Table 2	All	NA	ITT	Summary	Subject Characteristics	Sex	Sex	Male	Men	NA		NA		157	Percentage	%	36.3057					NA	%	36.3057	36	35	30					NA
3	Thompson 2021	Intervention	Persea americana for Total Health (PATH) Study (NCT02740439)	Table 2	All	NA	ITT	Summary	Subject Characteristics	Anthropometry	Weight groups	Obese I	BMI, 30-34.9	NA		NA		157	Count	Count	NA	NA	NA	NA	NA	NA	Count	NA	NA	NA	NA	NA	NA	NA	NA	NA
3	Thompson 2021	Intervention	Persea americana for Total Health (PATH) Study (NCT02740439)	Table 2	All	NA	ITT	Summary	Subject Characteristics	Anthropometry	Weight groups	Obese I	BMI, 30-34.9	NA		NA		157	Percentage	%	NA	NA	NA	NA	NA	NA	%	NA	NA	NA	NA	NA	NA	NA	NA	NA
3	Thompson 2021	Intervention	Persea americana for Total Health (PATH) Study (NCT02740439)	Table 2	All	NA	ITT	Summary	Subject Characteristics	Anthropometry	Weight groups	Obese II	BMI, 35-39.9	NA		NA		157	Count	Count	NA	NA	NA	NA	NA	NA	Count	NA	NA	NA	NA	NA	NA	NA	NA	NA
3	Thompson 2021	Intervention	Persea americana for Total Health (PATH) Study (NCT02740439)	Table 2	All	NA	ITT	Summary	Subject Characteristics	Anthropometry	Weight groups	Obese II	BMI, 35-39.9	NA		NA		157	Percentage	%	NA	NA	NA	NA	NA	NA	%	NA	NA	NA	NA	NA	NA	NA	NA	NA
3	Thompson 2021	Intervention	Persea americana for Total Health (PATH) Study (NCT02740439)	Table 2	All	NA	ITT	Summary	Subject Characteristics	Anthropometry	Weight groups	Obese III	BMI, >=40	NA		NA		157	Count	Count	NA	NA	NA	NA	NA	NA	Count	NA	NA	NA	NA	NA	NA	NA	NA	NA
3	Thompson 2021	Intervention	Persea americana for Total Health (PATH) Study (NCT02740439)	Table 2	All	NA	ITT	Summary	Subject Characteristics	Anthropometry	Weight groups	Obese III	BMI, >=40	NA		NA		157	Percentage	%	NA	NA	NA	NA	NA	NA	%	NA	NA	NA	NA	NA	NA	NA	NA	NA
3	Thompson 2021	Intervention	Persea americana for Total Health (PATH) Study (NCT02740439)	Table 2	All	NA	ITT	Summary	Subject Characteristics	Anthropometry	Weight groups	Overweight	BMI, OW	NA		NA		157	Count	Count	NA	NA	NA	NA	NA	NA	Count	NA	NA	NA	NA	NA	NA	NA	NA	NA
3	Thompson 2021	Intervention	Persea americana for Total Health (PATH) Study (NCT02740439)	Table 2	All	NA	ITT	Summary	Subject Characteristics	Anthropometry	Weight groups	Overweight	BMI, OW	NA		NA		157	Percentage	%	NA	NA	NA	NA	NA	NA	%	NA	NA	NA	NA	NA	NA	NA	NA	NA
3	Thompson 2021	Intervention	Persea americana for Total Health (PATH) Study (NCT02740439)	Table 3	Control	NA	PP	Summary	Dietary	Macronutrients	Carbohydrates	Carbohydrates	Total CHO	NA	12	weeks	12	52	Mean	g/d	NA	NA	NA	NA	NA	SD	g/d	NA	NA	NA	NA	NA	NA	NA	NA	NA
3	Thompson 2021	Intervention	Persea americana for Total Health (PATH) Study (NCT02740439)	Table 3	Control	NA	PP	Summary	Dietary	Energy	Energy	Energy	Total energy	NA	12	weeks	12	52	Mean	kcal/d	NA	NA	NA	NA	NA	SD	kcal/d	NA	NA	NA	NA	NA	NA	NA	NA	NA
3	Thompson 2021	Intervention	Persea americana for Total Health (PATH) Study (NCT02740439)	Table 3	Control	NA	PP	Summary	Dietary	Macronutrients	Fat	Fat	Total fat	NA	12	weeks	12	52	Mean	g/d	NA	NA	NA	NA	NA	SD	g/d	NA	NA	NA	NA	NA	NA	NA	NA	NA
3	Thompson 2021	Intervention	Persea americana for Total Health (PATH) Study (NCT02740439)	Table 3	Control	NA	PP	Summary	Dietary	Fiber	Fiber	Fiber	Total DF	NA	12	weeks	12	52	Mean	g/d	NA	NA	NA	NA	NA	SD	g/d	NA	NA	NA	NA	NA	NA	NA	NA	NA
3	Thompson 2021	Intervention	Persea americana for Total Health (PATH) Study (NCT02740439)	Table 3	Control	NA	PP	Summary	Dietary	Fiber	Fiber	Insoluble Fiber	Insoluble DF	NA	12	weeks	12	52	Mean	g/d	NA	NA	NA	NA	NA	SD	g/d	NA	NA	NA	NA	NA	NA	NA	NA	NA
3	Thompson 2021	Intervention	Persea americana for Total Health (PATH) Study (NCT02740439)	Table 3	Control	NA	PP	Summary	Dietary	Fiber	Fiber	Pectins	Pectins	NA	12	weeks	12	52	Mean	g/d	NA	NA	NA	NA	NA	SD	g/d	NA	NA	NA	NA	NA	NA	NA	NA	NA
3	Thompson 2021	Intervention	Persea americana for Total Health (PATH) Study (NCT02740439)	Table 3	Control	NA	PP	Summary	Dietary	Fiber	Fiber	Soluble Fiber	Soluble DF	NA	12	weeks	12	52	Mean	g/d	NA	NA	NA	NA	NA	SD	g/d	NA	NA	NA	NA	NA	NA	NA	NA	NA
3	Thompson 2021	Intervention	Persea americana for Total Health (PATH) Study (NCT02740439)	Table 3	Control	NA	PP	Summary	Dietary	Fatty acids	MUFA	MUFA	MUFA	NA	12	weeks	12	52	Mean	g/d	NA	NA	NA	NA	NA	SD	g/d	NA	NA	NA	NA	NA	NA	NA	NA	NA
3	Thompson 2021	Intervention	Persea americana for Total Health (PATH) Study (NCT02740439)	Table 3	Control	NA	PP	Summary	Dietary	Macronutrients	Protein	Protein	Total PRO	NA	12	weeks	12	52	Mean	g/d	NA	NA	NA	NA	NA	SD	g/d	NA	NA	NA	NA	NA	NA	NA	NA	NA
3	Thompson 2021	Intervention	Persea americana for Total Health (PATH) Study (NCT02740439)	Table 3	Control	NA	PP	Summary	Dietary	Fatty acids	PUFA	PUFA	PUFA	NA	12	weeks	12	52	Mean	g/d	NA	NA	NA	NA	NA	SD	g/d	NA	NA	NA	NA	NA	NA	NA	NA	NA
3	Thompson 2021	Intervention	Persea americana for Total Health (PATH) Study (NCT02740439)	Table 3	Control	NA	PP	Summary	Dietary	Fatty acids	SFA	SFA	Saturated fat	NA	12	weeks	12	52	Mean	g/d	NA	NA	NA	NA	NA	SD	g/d	NA	NA	NA	NA	NA	NA	NA	NA	NA
3	Thompson 2021	Intervention	Persea americana for Total Health (PATH) Study (NCT02740439)	Table 3	Treatment	NA	PP	Summary	Dietary	Macronutrients	Carbohydrates	Carbohydrates	Total CHO	NA	12	weeks	12	54	Mean	g/d	NA	NA	NA	NA	NA	SD	g/d	NA	NA	NA	NA	NA	NA	NA	NA	NA
3	Thompson 2021	Intervention	Persea americana for Total Health (PATH) Study (NCT02740439)	Table 3	Treatment	NA	PP	Summary	Dietary	Energy	Energy	Energy	Total energy	NA	12	weeks	12	54	Mean	kcal/d	NA	NA	NA	NA	NA	SD	kcal/d	NA	NA	NA	NA	NA	NA	NA	NA	NA
3	Thompson 2021	Intervention	Persea americana for Total Health (PATH) Study (NCT02740439)	Table 3	Treatment	NA	PP	Summary	Dietary	Macronutrients	Fat	Fat	Total fat	NA	12	weeks	12	54	Mean	g/d	NA	NA	NA	NA	NA	SD	g/d	NA	NA	NA	NA	NA	NA	NA	NA	NA
3	Thompson 2021	Intervention	Persea americana for Total Health (PATH) Study (NCT02740439)	Table 3	Treatment	NA	PP	Summary	Dietary	Fiber	Fiber	Fiber	Total DF	NA	12	weeks	12	54	Mean	g/d	NA	NA	NA	NA	NA	SD	g/d	NA	NA	NA	NA	NA	NA	NA	NA	NA
3	Thompson 2021	Intervention	Persea americana for Total Health (PATH) Study (NCT02740439)	Table 3	Treatment	NA	PP	Summary	Dietary	Fiber	Fiber	Insoluble Fiber	Insoluble DF	NA	12	weeks	12	54	Mean	g/d	NA	NA	NA	NA	NA	SD	g/d	NA	NA	NA	NA	NA	NA	NA	NA	NA
3	Thompson 2021	Intervention	Persea americana for Total Health (PATH) Study (NCT02740439)	Table 3	Treatment	NA	PP	Summary	Dietary	Fiber	Fiber	Pectins	Pectins	NA	12	weeks	12	54	Mean	g/d	NA	NA	NA	NA	NA	SD	g/d	NA	NA	NA	NA	NA	NA	NA	NA	NA
3	Thompson 2021	Intervention	Persea americana for Total Health (PATH) Study (NCT02740439)	Table 3	Treatment	NA	PP	Summary	Dietary	Fiber	Fiber	Soluble Fiber	Soluble DF	NA	12	weeks	12	54	Mean	g/d	NA	NA	NA	NA	NA	SD	g/d	NA	NA	NA	NA	NA	NA	NA	NA	NA
3	Thompson 2021	Intervention	Persea americana for Total Health (PATH) Study (NCT02740439)	Table 3	Treatment	NA	PP	Summary	Dietary	Fatty acids	MUFA	MUFA	MUFA	NA	12	weeks	12	54	Mean	g/d	NA	NA	NA	NA	NA	SD	g/d	NA	NA	NA	NA	NA	NA	NA	NA	NA
3	Thompson 2021	Intervention	Persea americana for Total Health (PATH) Study (NCT02740439)	Table 3	Treatment	NA	PP	Summary	Dietary	Macronutrients	Protein	Protein	Total PRO	NA	12	weeks	12	54	Mean	g/d	NA	NA	NA	NA	NA	SD	g/d	NA	NA	NA	NA	NA	NA	NA	NA	NA
3	Thompson 2021	Intervention	Persea americana for Total Health (PATH) Study (NCT02740439)	Table 3	Treatment	NA	PP	Summary	Dietary	Fatty acids	PUFA	PUFA	PUFA	NA	12	weeks	12	54	Mean	g/d	NA	NA	NA	NA	NA	SD	g/d	NA	NA	NA	NA	NA	NA	NA	NA	NA
3	Thompson 2021	Intervention	Persea americana for Total Health (PATH) Study (NCT02740439)	Table 3	Treatment	NA	PP	Summary	Dietary	Fatty acids	SFA	SFA	Saturated fat	NA	12	weeks	12	54	Mean	g/d	NA	NA	NA	NA	NA	SD	g/d	NA	NA	NA	NA	NA	NA	NA	NA	NA
3	Thompson 2021	Intervention	Persea americana for Total Health (PATH) Study (NCT02740439)	Table 4	Control	NA	PP	Summary	Outcome	Microbiome	Gut microbiota	Fecal bacteria	Fecal bacteria	Fecal	12	weeks	12	54	NA	relative abundance	NA	NA	NA	NA	NA	NA	relative abundance	NA	NA	NA	NA	NA	NA	NA	NA	NA
3	Thompson 2021	Intervention	Persea americana for Total Health (PATH) Study (NCT02740439)	Table 4	Treatment	NA	PP	Summary	Outcome	Microbiome	Gut microbiota	Fecal bacteria	Fecal bacteria	Fecal	12	weeks	12	55	NA	relative abundance	NA	NA	NA	NA	NA	NA	relative abundance	NA	NA	NA	NA	NA	NA	NA	NA	NA
3	Thompson 2021	Intervention	Persea americana for Total Health (PATH) Study (NCT02740439)	Table 5	Control	NA	PP	Summary	Outcome	Fecal acids	Acetate	Acetate	Acetate	Fecal	12	weeks	12	52	Mean	umol/g	NA	NA	NA	NA	NA	SD	μmol/g	NA	NA	NA	NA	NA	NA	NA	NA	NA
3	Thompson 2021	Intervention	Persea americana for Total Health (PATH) Study (NCT02740439)	Table 5	Control	NA	PP	Summary	Outcome	Fecal acids	Butyrate	Butyrate	Butyrate	Fecal	12	weeks	12	52	Mean	umol/g	NA	NA	NA	NA	NA	SD	μmol/g	NA	NA	NA	NA	NA	NA	NA	NA	NA
3	Thompson 2021	Intervention	Persea americana for Total Health (PATH) Study (NCT02740439)	Table 5	Control	NA	PP	Summary	Outcome	Fecal acids	Isobutyrate	Isobutyrate	Isobutyrate	Fecal	12	weeks	12	52	Mean	umol/g	NA	NA	NA	NA	NA	SD	μmol/g	NA	NA	NA	NA	NA	NA	NA	NA	NA
3	Thompson 2021	Intervention	Persea americana for Total Health (PATH) Study (NCT02740439)	Table 5	Control	NA	PP	Summary	Outcome	Fecal acids	Isovalerate	Isovalerate	Isovalerate	Fecal	12	weeks	12	52	Mean	umol/g	NA	NA	NA	NA	NA	SD	μmol/g	NA	NA	NA	NA	NA	NA	NA	NA	NA
3	Thompson 2021	Intervention	Persea americana for Total Health (PATH) Study (NCT02740439)	Table 5	Control	NA	PP	Summary	Outcome	Fecal acids	Propionate	Propionate	Propionate	Fecal	12	weeks	12	52	Mean	umol/g	NA	NA	NA	NA	NA	SD	μmol/g	NA	NA	NA	NA	NA	NA	NA	NA	NA
3	Thompson 2021	Intervention	Persea americana for Total Health (PATH) Study (NCT02740439)	Table 5	Control	NA	PP	Summary	Outcome	Fecal acids	SCFA:BCFA	SCFA:BCFA	SCFA:BCFA	Fecal	12	weeks	12	52	Mean	umol/g	NA	NA	NA	NA	NA	SD	μmol/g	NA	NA	NA	NA	NA	NA	NA	NA	NA
3	Thompson 2021	Intervention	Persea americana for Total Health (PATH) Study (NCT02740439)	Table 5	Control	NA	PP	Summary	Outcome	Fecal acids	Summed BCFAs	Summed BCFAs	Summed BCFAs	Fecal	12	weeks	12	52	Mean	umol/g	NA	NA	NA	NA	NA	SD	μmol/g	NA	NA	NA	NA	NA	NA	NA	NA	NA
3	Thompson 2021	Intervention	Persea americana for Total Health (PATH) Study (NCT02740439)	Table 5	Control	NA	PP	Summary	Outcome	Fecal acids	Summed SCFAs	Summed SCFAs	Summed SCFAs	Fecal	12	weeks	12	52	Mean	umol/g	NA	NA	NA	NA	NA	SD	μmol/g	NA	NA	NA	NA	NA	NA	NA	NA	NA
3	Thompson 2021	Intervention	Persea americana for Total Health (PATH) Study (NCT02740439)	Table 5	Control	NA	PP	Summary	Outcome	Fecal acids	Valerate	Valerate	Valerate	Fecal	12	weeks	12	52	Mean	umol/g	NA	NA	NA	NA	NA	SD	μmol/g	NA	NA	NA	NA	NA	NA	NA	NA	NA
3	Thompson 2021	Intervention	Persea americana for Total Health (PATH) Study (NCT02740439)	Table 5	Treatment	NA	PP	Summary	Outcome	Fecal acids	Acetate	Acetate	Acetate	Fecal	12	weeks	12	54	Mean	umol/g	NA	NA	NA	NA	NA	SD	μmol/g	NA	NA	NA	NA	NA	NA	NA	NA	NA
3	Thompson 2021	Intervention	Persea americana for Total Health (PATH) Study (NCT02740439)	Table 5	Treatment	NA	PP	Summary	Outcome	Fecal acids	Butyrate	Butyrate	Butyrate	Fecal	12	weeks	12	54	Mean	umol/g	NA	NA	NA	NA	NA	SD	μmol/g	NA	NA	NA	NA	NA	NA	NA	NA	NA
3	Thompson 2021	Intervention	Persea americana for Total Health (PATH) Study (NCT02740439)	Table 5	Treatment	NA	PP	Summary	Outcome	Fecal acids	Isobutyrate	Isobutyrate	Isobutyrate	Fecal	12	weeks	12	54	Mean	umol/g	NA	NA	NA	NA	NA	SD	μmol/g	NA	NA	NA	NA	NA	NA	NA	NA	NA
3	Thompson 2021	Intervention	Persea americana for Total Health (PATH) Study (NCT02740439)	Table 5	Treatment	NA	PP	Summary	Outcome	Fecal acids	Isovalerate	Isovalerate	Isovalerate	Fecal	12	weeks	12	54	Mean	umol/g	NA	NA	NA	NA	NA	SD	μmol/g	NA	NA	NA	NA	NA	NA	NA	NA	NA
3	Thompson 2021	Intervention	Persea americana for Total Health (PATH) Study (NCT02740439)	Table 5	Treatment	NA	PP	Summary	Outcome	Fecal acids	Propionate	Propionate	Propionate	Fecal	12	weeks	12	54	Mean	umol/g	NA	NA	NA	NA	NA	SD	μmol/g	NA	NA	NA	NA	NA	NA	NA	NA	NA
3	Thompson 2021	Intervention	Persea americana for Total Health (PATH) Study (NCT02740439)	Table 5	Treatment	NA	PP	Summary	Outcome	Fecal acids	SCFA:BCFA	SCFA:BCFA	SCFA:BCFA	Fecal	12	weeks	12	54	Mean	umol/g	NA	NA	NA	NA	NA	SD	μmol/g	NA	NA	NA	NA	NA	NA	NA	NA	NA
3	Thompson 2021	Intervention	Persea americana for Total Health (PATH) Study (NCT02740439)	Table 5	Treatment	NA	PP	Summary	Outcome	Fecal acids	Summed BCFAs	Summed BCFAs	Summed BCFAs	Fecal	12	weeks	12	54	Mean	umol/g	NA	NA	NA	NA	NA	SD	μmol/g	NA	NA	NA	NA	NA	NA	NA	NA	NA
3	Thompson 2021	Intervention	Persea americana for Total Health (PATH) Study (NCT02740439)	Table 5	Treatment	NA	PP	Summary	Outcome	Fecal acids	Summed SCFAs	Summed SCFAs	Summed SCFAs	Fecal	12	weeks	12	54	Mean	umol/g	NA	NA	NA	NA	NA	SD	μmol/g	NA	NA	NA	NA	NA	NA	NA	NA	NA
3	Thompson 2021	Intervention	Persea americana for Total Health (PATH) Study (NCT02740439)	Table 5	Treatment	NA	PP	Summary	Outcome	Fecal acids	Valerate	Valerate	Valerate	Fecal	12	weeks	12	54	Mean	umol/g	NA	NA	NA	NA	NA	SD	μmol/g	NA	NA	NA	NA	NA	NA	NA	NA	NA
4	Kopec 2014	Intervention	NCT01432210	Figure 1	Sauce + avo	NA	PP	Summary	Outcome	Nutrient bioavailability	Retinyl esters	Retinyl esters	Retinyl esters	Plasma		NA		11	NA	nmol/L	NA	NA	NA	NA	NA	NA	nmol/L	NA	NA	NA	NA	NA	NA	NA	NA	NA
4	Kopec 2014	Intervention	NCT01432210	Figure 1	Sauce + avo	NA	PP	Summary	Outcome	Nutrient bioavailability	β-carotene	β-carotene	b-carotene	Plasma		NA		11	NA	nmol/L	NA	NA	NA	NA	NA	NA	μmol/L	NA	NA	NA	NA	NA	NA	NA	NA	NA
4	Kopec 2014	Intervention	NCT01432210	Figure 1	Sauce alone	NA	PP	Summary	Outcome	Nutrient bioavailability	Retinyl esters	Retinyl esters	Retinyl esters	Plasma		NA		11	NA	nmol/L	NA	NA	NA	NA	NA	NA	nmol/L	NA	NA	NA	NA	NA	NA	NA	NA	NA
4	Kopec 2014	Intervention	NCT01432210	Figure 1	Sauce alone	NA	PP	Summary	Outcome	Nutrient bioavailability	β-carotene	β-carotene	b-carotene	Plasma		NA		11	NA	nmol/L	NA	NA	NA	NA	NA	NA	μmol/L	NA	NA	NA	NA	NA	NA	NA	NA	NA
4	Kopec 2014	Intervention	NCT01432210	Figure 2	Carrot + avo	NA	PP	Summary	Outcome	Nutrient bioavailability	Retinyl esters	Retinyl esters	Retinyl esters	Plasma		NA		12	NA	nmol/L	NA	NA	NA	NA	NA	NA	nmol/L	NA	NA	NA	NA	NA	NA	NA	NA	NA
4	Kopec 2014	Intervention	NCT01432210	Figure 2	Carrot + avo	NA	PP	Summary	Outcome	Nutrient bioavailability	α-carotene	α-carotene	a-carotene	Plasma		NA		12	NA	nmol/L	NA	NA	NA	NA	NA	NA	μmol/L	NA	NA	NA	NA	NA	NA	NA	NA	NA
4	Kopec 2014	Intervention	NCT01432210	Figure 2	Carrot + avo	NA	PP	Summary	Outcome	Nutrient bioavailability	β-carotene	β-carotene	b-carotene	Plasma		NA		12	NA	nmol/L	NA	NA	NA	NA	NA	NA	μmol/L	NA	NA	NA	NA	NA	NA	NA	NA	NA
4	Kopec 2014	Intervention	NCT01432210	Figure 2	Carrot alone	NA	PP	Summary	Outcome	Nutrient bioavailability	Retinyl esters	Retinyl esters	Retinyl esters	Plasma		NA		12	NA	nmol/L	NA	NA	NA	NA	NA	NA	nmol/L	NA	NA	NA	NA	NA	NA	NA	NA	NA
4	Kopec 2014	Intervention	NCT01432210	Figure 2	Carrot alone	NA	PP	Summary	Outcome	Nutrient bioavailability	α-carotene	α-carotene	a-carotene	Plasma		NA		12	NA	nmol/L	NA	NA	NA	NA	NA	NA	μmol/L	NA	NA	NA	NA	NA	NA	NA	NA	NA
4	Kopec 2014	Intervention	NCT01432210	Figure 2	Carrot alone	NA	PP	Summary	Outcome	Nutrient bioavailability	β-carotene	β-carotene	b-carotene	Plasma		NA		12	NA	nmol/L	NA	NA	NA	NA	NA	NA	μmol/L	NA	NA	NA	NA	NA	NA	NA	NA	NA
4	Kopec 2014	Intervention	NCT01432210	Figure 3	Sauce + avo	NA	PP	Summary	Outcome	Nutrient bioavailability	Vitamin A conversion	Vitamin A conversion	Vitamin A conversion	Blood		NA		11	NA	%	NA	NA	NA	NA	NA	NA	%	NA	NA	NA	NA	NA	NA	NA	NA	NA
4	Kopec 2014	Intervention	NCT01432210	Figure 3	Sauce alone	NA	PP	Summary	Outcome	Nutrient bioavailability	Vitamin A conversion	Vitamin A conversion	Vitamin A conversion	Blood		NA		11	NA	%	NA	NA	NA	NA	NA	NA	%	NA	NA	NA	NA	NA	NA	NA	NA	NA
4	Kopec 2014	Intervention	NCT01432210	Methods section	Carrot + avo	NA	Planned	Summary	Dietary	Avocado intake	Avocado intake	Avocado intake	Avocado intake	NA		NA		12	Absolute value	g per test meal	150					NA	g/test meal	150	150	150	150					NA
4	Kopec 2014	Intervention	NCT01432210	Methods section	Carrot alone	NA	Planned	Summary	Dietary	Avocado intake	Avocado intake	Avocado intake	Avocado intake	NA		NA		12	Absolute value	g per test meal	0					NA	g/test meal	0	0	0	0					NA
4	Kopec 2014	Intervention	NCT01432210	Methods section	Sauce + avo	NA	Planned	Summary	Dietary	Avocado intake	Avocado intake	Avocado intake	Avocado intake	NA		NA		11	Absolute value	g per test meal	150					NA	g/test meal	150	150	150	150					NA
4	Kopec 2014	Intervention	NCT01432210	Methods section	Sauce alone	NA	Planned	Summary	Dietary	Avocado intake	Avocado intake	Avocado intake	Avocado intake	NA		NA		11	Absolute value	g per test meal	0					NA	g/test meal	0	0	0	0					NA
4	Kopec 2014	Intervention	NCT01432210	Table 1	Carrot study	Female	PP	Summary	Subject Characteristics	Age	Age	Age	Age	NA		NA		6	Mean	years	28.5	2.04	5	23.5	33.5	SD	years	28.5	28	25	20	2.04124	5	23.5	33.5	NA
4	Kopec 2014	Intervention	NCT01432210	Table 1	Carrot study	Male	PP	Summary	Subject Characteristics	Age	Age	Age	Age	NA		NA		6	Mean	years	27.2	1.63	4	23.2	31.2	SD	years	27.2	27	25	20	1.63299	4	23.2	31.2	NA
4	Kopec 2014	Intervention	NCT01432210	Table 1	Carrot study	Female	PP	Summary	Subject Characteristics	Anthropometry	BMI	BMI	BMI	NA		NA		6	Mean	kg/m^2	23.1	1.1	2.7	20.4	25.8	SD	kg/m^2	23.1	23	20	20	1.10227	2.7	20.4	25.8	NA
4	Kopec 2014	Intervention	NCT01432210	Table 1	Carrot study	Male	PP	Summary	Subject Characteristics	Anthropometry	BMI	BMI	BMI	NA		NA		6	Mean	kg/m^2	25.3	0.98	2.4	22.9	27.7	SD	kg/m^2	25.3	25	25	20	0.979796	2.4	22.9	27.7	NA
4	Kopec 2014	Intervention	NCT01432210	Table 1	Carrot study	All	PP	Summary	Subject Characteristics	Sex	Sex	Female	Female	NA		NA		12	Count	Count	6					NA	Count	6	6	5	0					NA
4	Kopec 2014	Intervention	NCT01432210	Table 1	Carrot study	All	PP	Summary	Subject Characteristics	Sex	Sex	Female	Female	NA		NA		12	Percentage	%	50					NA	%	50	50	50	50					NA
4	Kopec 2014	Intervention	NCT01432210	Table 1	Carrot study	All	PP	Summary	Subject Characteristics	Sex	Sex	Male	Male	NA		NA		12	Count	Count	6					NA	Count	6	6	5	0					NA
4	Kopec 2014	Intervention	NCT01432210	Table 1	Carrot study	All	PP	Summary	Subject Characteristics	Sex	Sex	Male	Male	NA		NA		12	Percentage	%	50					NA	%	50	50	50	50					NA
4	Kopec 2014	Intervention	NCT01432210	Table 1	Carrot study	Female	PP	Summary	Subject Characteristics	Lipids	Total cholesterol	Total cholesterol	Plasma TC	NA		NA		6	Mean	mg/dL	172	6.04	14.8	157.2	186.8	SD	mg/dL	172	172	170	170	6.04207	14.8	157.2	186.8	NA
4	Kopec 2014	Intervention	NCT01432210	Table 1	Carrot study	Male	PP	Summary	Subject Characteristics	Lipids	Total cholesterol	Total cholesterol	Plasma TC	NA		NA		6	Mean	mg/dL	166	12.74	31.2	134.8	197.2	SD	mg/dL	166	166	165	160	12.7373	31.2	134.8	197.2	NA
4	Kopec 2014	Intervention	NCT01432210	Table 1	Carrot study	Female	PP	Summary	Subject Characteristics	Lipids	Triglycerides	Triglycerides	Plasma TG	NA		NA		6	Mean	mg/dL	59.2	12.17	29.8	29.4	89	SD	mg/dL	59.2	59	55	50	12.1658	29.8	29.4	89	NA
4	Kopec 2014	Intervention	NCT01432210	Table 1	Carrot study	Male	PP	Summary	Subject Characteristics	Lipids	Triglycerides	Triglycerides	Plasma TG	NA		NA		6	Mean	mg/dL	88.3	35.76	87.6	0.7	175.9	SD	mg/dL	88.3	88	85	80	35.7626	87.6	0.7	175.9	NA
4	Kopec 2014	Intervention	NCT01432210	Table 1	Sauce study	Female	PP	Summary	Subject Characteristics	Age	Age	Age	Age	NA		NA		5	Mean	years	24.6	2.06	4.6	20	29.2	SD	years	24.6	24	20	20	2.05718	4.6	20	29.2	NA
4	Kopec 2014	Intervention	NCT01432210	Table 1	Sauce study	Male	PP	Summary	Subject Characteristics	Age	Age	Age	Age	NA		NA		6	Mean	years	26.7	2.04	5	21.7	31.7	SD	years	26.7	26	25	20	2.04124	5	21.7	31.7	NA
4	Kopec 2014	Intervention	NCT01432210	Table 1	Sauce study	Female	PP	Summary	Subject Characteristics	Anthropometry	BMI	BMI	BMI	NA		NA		5	Mean	kg/m^2	22.4	1.48	3.3	19.1	25.7	SD	kg/m^2	22.4	22	20	20	1.4758	3.3	19.1	25.7	NA
4	Kopec 2014	Intervention	NCT01432210	Table 1	Sauce study	Male	PP	Summary	Subject Characteristics	Anthropometry	BMI	BMI	BMI	NA		NA		6	Mean	kg/m^2	25.8	0.9	2.2	23.6	28	SD	kg/m^2	25.8	25	25	20	0.898146	2.2	23.6	28	NA
4	Kopec 2014	Intervention	NCT01432210	Table 1	Sauce study	All	PP	Summary	Subject Characteristics	Sex	Sex	Female	Female	NA		NA		11	Count	Count	5					NA	Count	5	5	5	0					NA
4	Kopec 2014	Intervention	NCT01432210	Table 1	Sauce study	All	PP	Summary	Subject Characteristics	Sex	Sex	Female	Female	NA		NA		11	Percentage	%	45.4545					NA	%	45.4545	45	45	40					NA
4	Kopec 2014	Intervention	NCT01432210	Table 1	Sauce study	All	PP	Summary	Subject Characteristics	Sex	Sex	Male	Male	NA		NA		11	Count	Count	6					NA	Count	6	6	5	0					NA
4	Kopec 2014	Intervention	NCT01432210	Table 1	Sauce study	All	PP	Summary	Subject Characteristics	Sex	Sex	Male	Male	NA		NA		11	Percentage	%	54.5455					NA	%	54.5455	54	50	50					NA
4	Kopec 2014	Intervention	NCT01432210	Table 1	Sauce study	Female	PP	Summary	Subject Characteristics	Lipids	Total cholesterol	Total cholesterol	Plasma TC	NA		NA		5	Mean	mg/dL	167	11.05	24.7	142.3	191.7	SD	mg/dL	167	167	165	160	11.0462	24.7	142.3	191.7	NA
4	Kopec 2014	Intervention	NCT01432210	Table 1	Sauce study	Male	PP	Summary	Subject Characteristics	Lipids	Total cholesterol	Total cholesterol	Plasma TC	NA		NA		6	Mean	mg/dL	151	10.98	26.9	124.1	177.9	SD	mg/dL	151	151	150	150	10.9819	26.9	124.1	177.9	NA
4	Kopec 2014	Intervention	NCT01432210	Table 1	Sauce study	Female	PP	Summary	Subject Characteristics	Lipids	Triglycerides	Triglycerides	Plasma TG	NA		NA		5	Mean	mg/dL	79.2	19.19	42.9	36.3	122.1	SD	mg/dL	79.2	79	75	70	19.1855	42.9	36.3	122.1	NA
4	Kopec 2014	Intervention	NCT01432210	Table 1	Sauce study	Male	PP	Summary	Subject Characteristics	Lipids	Triglycerides	Triglycerides	Plasma TG	NA		NA		6	Mean	mg/dL	107	26.58	65.1	41.9	172.1	SD	mg/dL	107	107	105	100	26.577	65.1	41.9	172.1	NA
4	Kopec 2014	Intervention	NCT01432210	Table 3	Sauce + avo	NA	PP	Summary	Outcome	Nutrient bioavailability	Lutein	Lutein AUC 12h	Lutein AUC 12hrs	Blood		NA		11	Median	nmol·h/L	NA	NA	NA	NA	NA	IQR	nmol/l per h	NA	NA	NA	NA	NA	NA	NA	NA	NA
4	Kopec 2014	Intervention	NCT01432210	Table 3	Sauce + avo	NA	PP	Summary	Outcome	Nutrient bioavailability	Lycopene	Lycopene AUC 12h	Lycopene AUC 12hrs	Blood		NA		11	Median	nmol·h/L	NA	NA	NA	NA	NA	IQR	nmol/l per h	NA	NA	NA	NA	NA	NA	NA	NA	NA
4	Kopec 2014	Intervention	NCT01432210	Table 3	Sauce + avo	NA	PP	Summary	Outcome	Nutrient bioavailability	Phylloquinone	Phylloquinone AUC 12h	Phylloquinone AUC 12hrs	Blood		NA		11	Median	nmol·h/L	NA	NA	NA	NA	NA	IQR	nmol/L per h	NA	NA	NA	NA	NA	NA	NA	NA	NA
4	Kopec 2014	Intervention	NCT01432210	Table 3	Sauce + avo	NA	PP	Summary	Outcome	Nutrient bioavailability	Retinyl esters	Retinyl esters AUC 12h	Retinyl esters AUC 12hrs	Blood		NA		11	Median	nmol·h/L	NA	NA	NA	NA	NA	IQR	nmol/L per h	NA	NA	NA	NA	NA	NA	NA	NA	NA
4	Kopec 2014	Intervention	NCT01432210	Table 3	Sauce + avo	NA	PP	Summary	Outcome	Nutrient bioavailability	α-carotene	α-carotene AUC 12h	α-carotene AUC 12hrs	Blood		NA		11	NA	nmol·h/L	NA	NA	NA	NA	NA	NA	nmol/l per h	NA	NA	NA	NA	NA	NA	NA	NA	NA
4	Kopec 2014	Intervention	NCT01432210	Table 3	Sauce + avo	NA	PP	Summary	Outcome	Nutrient bioavailability	α-tocopherol	α-tocopherol AUC 12h	α-tocopherol AUC 12hrs	Blood		NA		11	Median	nmol·h/L	NA	NA	NA	NA	NA	IQR	nmol/l per h	NA	NA	NA	NA	NA	NA	NA	NA	NA
4	Kopec 2014	Intervention	NCT01432210	Table 3	Sauce + avo	NA	PP	Summary	Outcome	Nutrient bioavailability	β-carotene	β-carotene AUC 12h	β-carotene AUC 12hrs	Blood		NA		11	Median	nmol·h/L	NA	NA	NA	NA	NA	IQR	nmol/l per h	NA	NA	NA	NA	NA	NA	NA	NA	NA
4	Kopec 2014	Intervention	NCT01432210	Table 3	Sauce alone	NA	PP	Summary	Outcome	Nutrient bioavailability	Lutein	Lutein AUC 12h	Lutein AUC 12hrs	Blood		NA		11	NA	nmol·h/L	NA	NA	NA	NA	NA	NA	nmol/l per h	NA	NA	NA	NA	NA	NA	NA	NA	NA
4	Kopec 2014	Intervention	NCT01432210	Table 3	Sauce alone	NA	PP	Summary	Outcome	Nutrient bioavailability	Lycopene	Lycopene AUC 12h	Lycopene AUC 12hrs	Blood		NA		11	Median	nmol·h/L	NA	NA	NA	NA	NA	IQR	nmol/l per h	NA	NA	NA	NA	NA	NA	NA	NA	NA
4	Kopec 2014	Intervention	NCT01432210	Table 3	Sauce alone	NA	PP	Summary	Outcome	Nutrient bioavailability	Phylloquinone	Phylloquinone AUC 12h	Phylloquinone AUC 12hrs	Blood		NA		11	NA	nmol·h/L	NA	NA	NA	NA	NA	NA	nmol/L per h	NA	NA	NA	NA	NA	NA	NA	NA	NA
4	Kopec 2014	Intervention	NCT01432210	Table 3	Sauce alone	NA	PP	Summary	Outcome	Nutrient bioavailability	Retinyl esters	Retinyl esters AUC 12h	Retinyl esters AUC 12hrs	Blood		NA		11	Median	nmol·h/L	NA	NA	NA	NA	NA	IQR	nmol/L per h	NA	NA	NA	NA	NA	NA	NA	NA	NA
4	Kopec 2014	Intervention	NCT01432210	Table 3	Sauce alone	NA	PP	Summary	Outcome	Nutrient bioavailability	α-carotene	α-carotene AUC 12h	α-carotene AUC 12hrs	Blood		NA		11	NA	nmol·h/L	NA	NA	NA	NA	NA	NA	nmol/l per h	NA	NA	NA	NA	NA	NA	NA	NA	NA
4	Kopec 2014	Intervention	NCT01432210	Table 3	Sauce alone	NA	PP	Summary	Outcome	Nutrient bioavailability	α-tocopherol	α-tocopherol AUC 12h	α-tocopherol AUC 12hrs	Blood		NA		11	NA	nmol·h/L	NA	NA	NA	NA	NA	NA	nmol/l per h	NA	NA	NA	NA	NA	NA	NA	NA	NA
4	Kopec 2014	Intervention	NCT01432210	Table 3	Sauce alone	NA	PP	Summary	Outcome	Nutrient bioavailability	β-carotene	β-carotene AUC 12h	β-carotene AUC 12hrs	Blood		NA		11	Median	nmol·h/L	NA	NA	NA	NA	NA	IQR	nmol/l per h	NA	NA	NA	NA	NA	NA	NA	NA	NA
4	Kopec 2014	Intervention	NCT01432210	Table 4	Carrot + avo	NA	PP	Summary	Outcome	Nutrient bioavailability	Lutein	Lutein AUC 12h	Lutein AUC 12hrs	Blood		NA		12	Median	nmol·h/L	NA	NA	NA	NA	NA	IQR	nmol/l per h	NA	NA	NA	NA	NA	NA	NA	NA	NA
4	Kopec 2014	Intervention	NCT01432210	Table 4	Carrot + avo	NA	PP	Summary	Outcome	Nutrient bioavailability	Lycopene	Lycopene AUC 12h	Lycopene AUC 12hrs	Blood		NA		12	NA	nmol·h/L	NA	NA	NA	NA	NA	NA	nmol/l per h	NA	NA	NA	NA	NA	NA	NA	NA	NA
4	Kopec 2014	Intervention	NCT01432210	Table 4	Carrot + avo	NA	PP	Summary	Outcome	Nutrient bioavailability	Phylloquinone	Phylloquinone AUC 12h	Phylloquinone AUC 12hrs	Blood		NA		12	Median	nmol·h/L	NA	NA	NA	NA	NA	IQR	nmol/L per h	NA	NA	NA	NA	NA	NA	NA	NA	NA
4	Kopec 2014	Intervention	NCT01432210	Table 4	Carrot + avo	NA	PP	Summary	Outcome	Nutrient bioavailability	Retinyl esters	Retinyl esters AUC 12h	Retinyl esters AUC 12hrs	Blood		NA		12	Median	nmol·h/L	NA	NA	NA	NA	NA	IQR	nmol/L per h	NA	NA	NA	NA	NA	NA	NA	NA	NA
4	Kopec 2014	Intervention	NCT01432210	Table 4	Carrot + avo	NA	PP	Summary	Outcome	Nutrient bioavailability	α-carotene	α-carotene AUC 12h	α-carotene AUC 12hrs	Blood		NA		12	Median	nmol·h/L	NA	NA	NA	NA	NA	IQR	nmol/l per h	NA	NA	NA	NA	NA	NA	NA	NA	NA
4	Kopec 2014	Intervention	NCT01432210	Table 4	Carrot + avo	NA	PP	Summary	Outcome	Nutrient bioavailability	α-tocopherol	α-tocopherol AUC 12h	α-tocopherol AUC 12hrs	Blood		NA		12	Median	nmol·h/L	NA	NA	NA	NA	NA	IQR	nmol/l per h	NA	NA	NA	NA	NA	NA	NA	NA	NA
4	Kopec 2014	Intervention	NCT01432210	Table 4	Carrot + avo	NA	PP	Summary	Outcome	Nutrient bioavailability	β-carotene	β-carotene AUC 12h	β-carotene AUC 12hrs	Blood		NA		12	Median	nmol·h/L	NA	NA	NA	NA	NA	IQR	nmol/l per h	NA	NA	NA	NA	NA	NA	NA	NA	NA
4	Kopec 2014	Intervention	NCT01432210	Table 4	Carrot alone	NA	PP	Summary	Outcome	Nutrient bioavailability	Lutein	Lutein AUC 12h	Lutein AUC 12hrs	Blood		NA		12	Median	nmol·h/L	NA	NA	NA	NA	NA	IQR	nmol/l per h	NA	NA	NA	NA	NA	NA	NA	NA	NA
4	Kopec 2014	Intervention	NCT01432210	Table 4	Carrot alone	NA	PP	Summary	Outcome	Nutrient bioavailability	Lycopene	Lycopene AUC 12h	Lycopene AUC 12hrs	Blood		NA		12	NA	nmol·h/L	NA	NA	NA	NA	NA	NA	nmol/l per h	NA	NA	NA	NA	NA	NA	NA	NA	NA
4	Kopec 2014	Intervention	NCT01432210	Table 4	Carrot alone	NA	PP	Summary	Outcome	Nutrient bioavailability	Phylloquinone	Phylloquinone AUC 12h	Phylloquinone AUC 12hrs	Blood		NA		12	Median	nmol·h/L	NA	NA	NA	NA	NA	IQR	nmol/L per h	NA	NA	NA	NA	NA	NA	NA	NA	NA
4	Kopec 2014	Intervention	NCT01432210	Table 4	Carrot alone	NA	PP	Summary	Outcome	Nutrient bioavailability	Retinyl esters	Retinyl esters AUC 12h	Retinyl esters AUC 12hrs	Blood		NA		12	Median	nmol·h/L	NA	NA	NA	NA	NA	IQR	nmol/L per h	NA	NA	NA	NA	NA	NA	NA	NA	NA
4	Kopec 2014	Intervention	NCT01432210	Table 4	Carrot alone	NA	PP	Summary	Outcome	Nutrient bioavailability	α-carotene	α-carotene AUC 12h	α-carotene AUC 12hrs	Blood		NA		12	Median	nmol·h/L	NA	NA	NA	NA	NA	IQR	nmol/l per h	NA	NA	NA	NA	NA	NA	NA	NA	NA
4	Kopec 2014	Intervention	NCT01432210	Table 4	Carrot alone	NA	PP	Summary	Outcome	Nutrient bioavailability	α-tocopherol	α-tocopherol AUC 12h	α-tocopherol AUC 12hrs	Blood		NA		12	NA	nmol·h/L	NA	NA	NA	NA	NA	NA	nmol/l per h	NA	NA	NA	NA	NA	NA	NA	NA	NA
4	Kopec 2014	Intervention	NCT01432210	Table 4	Carrot alone	NA	PP	Summary	Outcome	Nutrient bioavailability	β-carotene	β-carotene AUC 12h	β-carotene AUC 12hrs	Blood		NA		12	Median	nmol·h/L	NA	NA	NA	NA	NA	IQR	nmol/l per h	NA	NA	NA	NA	NA	NA	NA	NA	NA
5	Scott 2017	Intervention	NCT01621646	Methods section	Control	NA	Planned	Summary	Dietary	Avocado intake	Avocado intake	Avocado intake	Avocado intake	NA		NA		20	Average	g/d	0					NA	g/d	0	0	0	0					NA
5	Scott 2017	Intervention	NCT01621646	Methods section	Treatment	NA	Planned	Summary	Dietary	Avocado intake	Avocado intake	Avocado intake	Avocado intake	NA		NA		20	Average	g/d	135					NA	g/d	135	135	135	130					NA
5	Scott 2017	Intervention	NCT01621646	Table 2	Control	NA	ITT	Summary	Dietary	Macronutrients	Carbohydrates	Carbohydrates	Dietary CHO	NA	0	weeks	0	20	Mean	g/d	NA	NA	NA	NA	NA	SD	g/d	NA	NA	NA	NA	NA	NA	NA	NA	NA
5	Scott 2017	Intervention	NCT01621646	Table 2	Control	NA	ITT	Summary	Dietary	Macronutrients	Fat	Fat	Dietary fat	NA	0	weeks	0	20	Mean	g/d	NA	NA	NA	NA	NA	SD	g/d	NA	NA	NA	NA	NA	NA	NA	NA	NA
5	Scott 2017	Intervention	NCT01621646	Table 2	Control	NA	ITT	Summary	Dietary	Carotenoids	Lutein & Zeaxanthin	Lutein & Zeaxanthin	Dietary lutein/zeaxanthin	NA	0	weeks	0	20	Mean	mg/d	NA	NA	NA	NA	NA	SD	μg/d	NA	NA	NA	NA	NA	NA	NA	NA	NA
5	Scott 2017	Intervention	NCT01621646	Table 2	Control	NA	ITT	Summary	Dietary	Fatty acids	MUFA	MUFA	Dietary MUFA	NA	0	weeks	0	20	Mean	g/d	NA	NA	NA	NA	NA	SD	g/d	NA	NA	NA	NA	NA	NA	NA	NA	NA
5	Scott 2017	Intervention	NCT01621646	Table 2	Control	NA	ITT	Summary	Dietary	Macronutrients	Protein	Protein	Dietary PRO	NA	0	weeks	0	20	Mean	g/d	NA	NA	NA	NA	NA	SD	g/d	NA	NA	NA	NA	NA	NA	NA	NA	NA
5	Scott 2017	Intervention	NCT01621646	Table 2	Control	NA	ITT	Summary	Subject Characteristics	Age	Age	Age	Age	NA		NA		20	Mean	years	62.5	2.06	9.2	53.3	71.7	SD	years	62.5	62	60	60	2.05718	9.2	53.3	71.7	NA
5	Scott 2017	Intervention	NCT01621646	Table 2	Control	NA	ITT	Summary	Subject Characteristics	Anthropometry	BMI	BMI	BMI	NA		NA		20	Mean	kg/m^2	24.2	0.54	2.4	21.8	26.6	SD	kg/m^2	24.2	24	20	20	0.536656	2.4	21.8	26.6	NA
5	Scott 2017	Intervention	NCT01621646	Table 2	Control	NA	ITT	Summary	Subject Characteristics	Lifestyle	Education	College or higher	Education college or greater	NA		NA		20	Percentage	%	NA	NA	NA	NA	NA	NA	%	NA	NA	NA	NA	NA	NA	NA	NA	NA
5	Scott 2017	Intervention	NCT01621646	Table 2	Control	NA	ITT	Summary	Subject Characteristics	Sex	Sex	Female	Sex, female	NA		NA		20	Percentage	%	55					NA	%	55	55	55	50					NA
5	Scott 2017	Intervention	NCT01621646	Table 2	Control	NA	ITT	Summary	Subject Characteristics	Sex	Sex	Male	Sex, male	NA		NA		20	Percentage	%	45					NA	%	45	45	45	40					NA
5	Scott 2017	Intervention	NCT01621646	Table 2	Treatment	NA	ITT	Summary	Dietary	Macronutrients	Carbohydrates	Carbohydrates	Dietary CHO	NA	0	weeks	0	20	Mean	g/d	NA	NA	NA	NA	NA	SD	g/d	NA	NA	NA	NA	NA	NA	NA	NA	NA
5	Scott 2017	Intervention	NCT01621646	Table 2	Treatment	NA	ITT	Summary	Dietary	Macronutrients	Fat	Fat	Dietary fat	NA	0	weeks	0	20	Mean	g/d	NA	NA	NA	NA	NA	SD	g/d	NA	NA	NA	NA	NA	NA	NA	NA	NA
5	Scott 2017	Intervention	NCT01621646	Table 2	Treatment	NA	ITT	Summary	Dietary	Carotenoids	Lutein & Zeaxanthin	Lutein & Zeaxanthin	Dietary lutein/zeaxanthin	NA	0	weeks	0	20	Mean	mg/d	NA	NA	NA	NA	NA	SD	μg/d	NA	NA	NA	NA	NA	NA	NA	NA	NA
5	Scott 2017	Intervention	NCT01621646	Table 2	Treatment	NA	ITT	Summary	Dietary	Fatty acids	MUFA	MUFA	Dietary MUFA	NA	0	weeks	0	20	Mean	g/d	NA	NA	NA	NA	NA	SD	g/d	NA	NA	NA	NA	NA	NA	NA	NA	NA
5	Scott 2017	Intervention	NCT01621646	Table 2	Treatment	NA	ITT	Summary	Dietary	Macronutrients	Protein	Protein	Dietary PRO	NA	0	weeks	0	20	Mean	g/d	NA	NA	NA	NA	NA	SD	g/d	NA	NA	NA	NA	NA	NA	NA	NA	NA
5	Scott 2017	Intervention	NCT01621646	Table 2	Treatment	NA	ITT	Summary	Subject Characteristics	Age	Age	Age	Age	NA		NA		20	Mean	years	63.3	2.48	11.1	52.2	74.4	SD	years	63.3	63	60	60	2.48204	11.1	52.2	74.4	NA
5	Scott 2017	Intervention	NCT01621646	Table 2	Treatment	NA	ITT	Summary	Subject Characteristics	Anthropometry	BMI	BMI	BMI	NA		NA		20	Mean	kg/m^2	24.1	0.69	3.1	21	27.2	SD	kg/m^2	24.1	24	20	20	0.693181	3.1	21	27.2	NA
5	Scott 2017	Intervention	NCT01621646	Table 2	Treatment	NA	ITT	Summary	Subject Characteristics	Lifestyle	Education	College or higher	Education college or greater	NA		NA		20	Percentage	%	NA	NA	NA	NA	NA	NA	%	NA	NA	NA	NA	NA	NA	NA	NA	NA
5	Scott 2017	Intervention	NCT01621646	Table 2	Treatment	NA	ITT	Summary	Subject Characteristics	Sex	Sex	Female	Sex, female	NA		NA		20	Percentage	%	70					NA	%	70	70	70	70					NA
5	Scott 2017	Intervention	NCT01621646	Table 2	Treatment	NA	ITT	Summary	Subject Characteristics	Sex	Sex	Male	Sex, male	NA		NA		20	Percentage	%	30					NA	%	30	30	30	30					NA
5	Scott 2017	Intervention	NCT01621646	Table 3	Control	NA	ITT	Summary	Outcome	Immune	CRP	hsCRP	CRP	Blood	3	months	12	19	Mean	mg/L	NA	NA	NA	NA	NA	SD	mg/L	NA	NA	NA	NA	NA	NA	NA	NA	NA
5	Scott 2017	Intervention	NCT01621646	Table 3	Control	NA	ITT	Summary	Outcome	Immune	CRP	hsCRP	CRP	Blood	6	months	24	19	Mean	mg/L	NA	NA	NA	NA	NA	SD	mg/L	NA	NA	NA	NA	NA	NA	NA	NA	NA
5	Scott 2017	Intervention	NCT01621646	Table 3	Control	NA	ITT	Summary	Outcome	Immune	CRP	hsCRP	CRP	Blood	0	weeks	0	19	Mean	mg/L	NA	NA	NA	NA	NA	SD	mg/L	NA	NA	NA	NA	NA	NA	NA	NA	NA
5	Scott 2017	Intervention	NCT01621646	Table 3	Control	NA	ITT	Summary	Outcome	Lipids	HDL-C	HDL-C	HDL	Blood	3	months	12	19	Mean	mg/dL	56	3.21	14	42	70	SD	mg/dL	56	56	55	50	3.21182	14	42	70	NA
5	Scott 2017	Intervention	NCT01621646	Table 3	Control	NA	ITT	Summary	Outcome	Lipids	HDL-C	HDL-C	HDL	Blood	6	months	24	19	Mean	mg/dL	57	4.13	18	39	75	SD	mg/dL	57	57	55	50	4.12948	18	39	75	NA
5	Scott 2017	Intervention	NCT01621646	Table 3	Control	NA	ITT	Summary	Outcome	Lipids	HDL-C	HDL-C	HDL	Blood	0	weeks	0	19	Mean	mg/dL	58	3.67	16	42	74	SD	mg/dL	58	58	55	50	3.67065	16	42	74	NA
5	Scott 2017	Intervention	NCT01621646	Table 3	Control	NA	ITT	Summary	Outcome	Antioxidation	LDL ox lag time	LDL ox lag time	LDL ox lag time	Blood	3	months	12	19	Mean	min	NA	NA	NA	NA	NA	SD	min	NA	NA	NA	NA	NA	NA	NA	NA	NA
5	Scott 2017	Intervention	NCT01621646	Table 3	Control	NA	ITT	Summary	Outcome	Antioxidation	LDL ox lag time	LDL ox lag time	LDL ox lag time	Blood	6	months	24	19	Mean	min	NA	NA	NA	NA	NA	SD	min	NA	NA	NA	NA	NA	NA	NA	NA	NA
5	Scott 2017	Intervention	NCT01621646	Table 3	Control	NA	ITT	Summary	Outcome	Antioxidation	LDL ox lag time	LDL ox lag time	LDL ox lag time	Blood	0	weeks	0	19	Mean	min	NA	NA	NA	NA	NA	SD	min	NA	NA	NA	NA	NA	NA	NA	NA	NA
5	Scott 2017	Intervention	NCT01621646	Table 3	Control	NA	ITT	Summary	Outcome	Lipids	LDL-C	LDL-C	LDL	Blood	3	months	12	19	Mean	mg/dL	137	8.49	37	100	174	SD	mg/dL	137	137	135	130	8.48838	37	100	174	NA
5	Scott 2017	Intervention	NCT01621646	Table 3	Control	NA	ITT	Summary	Outcome	Lipids	LDL-C	LDL-C	LDL	Blood	6	months	24	19	Mean	mg/dL	137	10.32	45	92	182	SD	mg/dL	137	137	135	130	10.3237	45	92	182	NA
5	Scott 2017	Intervention	NCT01621646	Table 3	Control	NA	ITT	Summary	Outcome	Lipids	LDL-C	LDL-C	LDL	Blood	0	weeks	0	19	Mean	mg/dL	132	8.49	37	95	169	SD	mg/dL	132	132	130	130	8.48838	37	95	169	NA
5	Scott 2017	Intervention	NCT01621646	Table 3	Control	NA	ITT	Summary	Outcome	Nutrient bioavailability	Lutein	Lutein	Lutein	Blood	3	months	12	19	Mean	nmol/L	NA	NA	NA	NA	NA	SD	μmol/L	NA	NA	NA	NA	NA	NA	NA	NA	NA
5	Scott 2017	Intervention	NCT01621646	Table 3	Control	NA	ITT	Summary	Outcome	Nutrient bioavailability	Lutein	Lutein	Lutein	Blood	6	months	24	19	Mean	nmol/L	NA	NA	NA	NA	NA	SD	μmol/L	NA	NA	NA	NA	NA	NA	NA	NA	NA
5	Scott 2017	Intervention	NCT01621646	Table 3	Control	NA	ITT	Summary	Outcome	Nutrient bioavailability	Lutein	Lutein	Lutein	Blood	0	weeks	0	19	Mean	nmol/L	NA	NA	NA	NA	NA	SD	μmol/L	NA	NA	NA	NA	NA	NA	NA	NA	NA
5	Scott 2017	Intervention	NCT01621646	Table 3	Control	NA	ITT	Summary	Outcome	Nutrient bioavailability	Macular pigment optical density	Macular pigment optical density	MPD	NA	3	months	12	20	Mean	d.u	NA	NA	NA	NA	NA	SD	d.u	NA	NA	NA	NA	NA	NA	NA	NA	NA
5	Scott 2017	Intervention	NCT01621646	Table 3	Control	NA	ITT	Summary	Outcome	Nutrient bioavailability	Macular pigment optical density	Macular pigment optical density	MPD	NA	6	months	24	20	Mean	d.u	NA	NA	NA	NA	NA	SD	d.u	NA	NA	NA	NA	NA	NA	NA	NA	NA
5	Scott 2017	Intervention	NCT01621646	Table 3	Control	NA	ITT	Summary	Outcome	Nutrient bioavailability	Macular pigment optical density	Macular pigment optical density	MPD	NA	0	weeks	0	20	Mean	d.u	NA	NA	NA	NA	NA	SD	d.u	NA	NA	NA	NA	NA	NA	NA	NA	NA
5	Scott 2017	Intervention	NCT01621646	Table 3	Control	NA	ITT	Summary	Outcome	Lipids	Total cholesterol	Total cholesterol	Cholesterol	Blood	3	months	12	19	Mean	mg/dL	209	9.64	42	167	251	SD	mg/dL	209	209	205	200	9.63546	42	167	251	NA
5	Scott 2017	Intervention	NCT01621646	Table 3	Control	NA	ITT	Summary	Outcome	Lipids	Total cholesterol	Total cholesterol	Cholesterol	Blood	6	months	24	19	Mean	mg/dL	205	12.39	54	151	259	SD	mg/dL	205	205	205	200	12.3884	54	151	259	NA
5	Scott 2017	Intervention	NCT01621646	Table 3	Control	NA	ITT	Summary	Outcome	Lipids	Total cholesterol	Total cholesterol	Cholesterol	Blood	0	weeks	0	19	Mean	mg/dL	200	10.55	46	154	246	SD	mg/dL	200	200	200	200	10.5531	46	154	246	NA
5	Scott 2017	Intervention	NCT01621646	Table 3	Control	NA	ITT	Summary	Outcome	Lipids	Triglycerides	Triglycerides	Triglycerides	Blood	3	months	12	19	Mean	mg/dL	94	19.27	84	10	178	SD	mg/dL	94	94	90	90	19.2709	84	10	178	NA
5	Scott 2017	Intervention	NCT01621646	Table 3	Control	NA	ITT	Summary	Outcome	Lipids	Triglycerides	Triglycerides	Triglycerides	Blood	6	months	24	19	Mean	mg/dL	93	13.31	58	35	151	SD	mg/dL	93	93	90	90	13.3061	58	35	151	NA
5	Scott 2017	Intervention	NCT01621646	Table 3	Control	NA	ITT	Summary	Outcome	Lipids	Triglycerides	Triglycerides	Triglycerides	Blood	0	weeks	0	19	Mean	mg/dL	84	12.62	55	29	139	SD	mg/dL	84	84	80	80	12.6179	55	29	139	NA
5	Scott 2017	Intervention	NCT01621646	Table 3	Control	NA	ITT	Summary	Outcome	Nutrient bioavailability	Zeaxanthin	Zeaxanthin	Zeaxanthin	Blood	3	months	12	19	Mean	nmol/L	NA	NA	NA	NA	NA	SD	μmol/L	NA	NA	NA	NA	NA	NA	NA	NA	NA
5	Scott 2017	Intervention	NCT01621646	Table 3	Control	NA	ITT	Summary	Outcome	Nutrient bioavailability	Zeaxanthin	Zeaxanthin	Zeaxanthin	Blood	6	months	24	19	Mean	nmol/L	NA	NA	NA	NA	NA	SD	μmol/L	NA	NA	NA	NA	NA	NA	NA	NA	NA
5	Scott 2017	Intervention	NCT01621646	Table 3	Control	NA	ITT	Summary	Outcome	Nutrient bioavailability	Zeaxanthin	Zeaxanthin	Zeaxanthin	Blood	0	weeks	0	19	Mean	nmol/L	NA	NA	NA	NA	NA	SD	μmol/L	NA	NA	NA	NA	NA	NA	NA	NA	NA
5	Scott 2017	Intervention	NCT01621646	Table 3	Control	NA	ITT	Summary	Outcome	Immune	β-amyloid	β-amyloid	β-amyloid	Blood	3	months	12	19	Mean	pg/mL	NA	NA	NA	NA	NA	SD	pg/mL	NA	NA	NA	NA	NA	NA	NA	NA	NA
5	Scott 2017	Intervention	NCT01621646	Table 3	Control	NA	ITT	Summary	Outcome	Immune	β-amyloid	β-amyloid	β-amyloid	Blood	6	months	24	19	Mean	pg/mL	NA	NA	NA	NA	NA	SD	pg/mL	NA	NA	NA	NA	NA	NA	NA	NA	NA
5	Scott 2017	Intervention	NCT01621646	Table 3	Control	NA	ITT	Summary	Outcome	Immune	β-amyloid	β-amyloid	β-amyloid	Blood	0	weeks	0	19	Mean	pg/mL	NA	NA	NA	NA	NA	SD	pg/mL	NA	NA	NA	NA	NA	NA	NA	NA	NA
5	Scott 2017	Intervention	NCT01621646	Table 3	Treatment	NA	ITT	Summary	Outcome	Immune	CRP	hsCRP	CRP	Blood	3	months	12	19	Mean	mg/L	NA	NA	NA	NA	NA	SD	mg/L	NA	NA	NA	NA	NA	NA	NA	NA	NA
5	Scott 2017	Intervention	NCT01621646	Table 3	Treatment	NA	ITT	Summary	Outcome	Immune	CRP	hsCRP	CRP	Blood	6	months	24	19	Mean	mg/L	NA	NA	NA	NA	NA	SD	mg/L	NA	NA	NA	NA	NA	NA	NA	NA	NA
5	Scott 2017	Intervention	NCT01621646	Table 3	Treatment	NA	ITT	Summary	Outcome	Immune	CRP	hsCRP	CRP	Blood	0	weeks	0	19	Mean	mg/L	NA	NA	NA	NA	NA	SD	mg/L	NA	NA	NA	NA	NA	NA	NA	NA	NA
5	Scott 2017	Intervention	NCT01621646	Table 3	Treatment	NA	ITT	Summary	Outcome	Lipids	HDL-C	HDL-C	HDL	Blood	3	months	12	19	Mean	mg/dL	61	5.28	23	38	84	SD	mg/dL	61	61	60	60	5.27656	23	38	84	NA
5	Scott 2017	Intervention	NCT01621646	Table 3	Treatment	NA	ITT	Summary	Outcome	Lipids	HDL-C	HDL-C	HDL	Blood	6	months	24	19	Mean	mg/dL	61	5.05	22	39	83	SD	mg/dL	61	61	60	60	5.04715	22	39	83	NA
5	Scott 2017	Intervention	NCT01621646	Table 3	Treatment	NA	ITT	Summary	Outcome	Lipids	HDL-C	HDL-C	HDL	Blood	0	weeks	0	19	Mean	mg/dL	57	4.82	21	36	78	SD	mg/dL	57	57	55	50	4.81773	21	36	78	NA
5	Scott 2017	Intervention	NCT01621646	Table 3	Treatment	NA	ITT	Summary	Outcome	Antioxidation	LDL ox lag time	LDL ox lag time	LDL ox lag time	Blood	3	months	12	19	Mean	min	NA	NA	NA	NA	NA	SD	min	NA	NA	NA	NA	NA	NA	NA	NA	NA
5	Scott 2017	Intervention	NCT01621646	Table 3	Treatment	NA	ITT	Summary	Outcome	Antioxidation	LDL ox lag time	LDL ox lag time	LDL ox lag time	Blood	6	months	24	19	Mean	min	NA	NA	NA	NA	NA	SD	min	NA	NA	NA	NA	NA	NA	NA	NA	NA
5	Scott 2017	Intervention	NCT01621646	Table 3	Treatment	NA	ITT	Summary	Outcome	Antioxidation	LDL ox lag time	LDL ox lag time	LDL ox lag time	Blood	0	weeks	0	19	Mean	min	NA	NA	NA	NA	NA	SD	min	NA	NA	NA	NA	NA	NA	NA	NA	NA
5	Scott 2017	Intervention	NCT01621646	Table 3	Treatment	NA	ITT	Summary	Outcome	Lipids	LDL-C	LDL-C	LDL	Blood	3	months	12	19	Mean	mg/dL	135	8.49	37	98	172	SD	mg/dL	135	135	135	130	8.48838	37	98	172	NA
5	Scott 2017	Intervention	NCT01621646	Table 3	Treatment	NA	ITT	Summary	Outcome	Lipids	LDL-C	LDL-C	LDL	Blood	6	months	24	19	Mean	mg/dL	131	5.74	25	106	156	SD	mg/dL	131	131	130	130	5.73539	25	106	156	NA
5	Scott 2017	Intervention	NCT01621646	Table 3	Treatment	NA	ITT	Summary	Outcome	Lipids	LDL-C	LDL-C	LDL	Blood	0	weeks	0	19	Mean	mg/dL	129	9.86	43	86	172	SD	mg/dL	129	129	125	120	9.86488	43	86	172	NA
5	Scott 2017	Intervention	NCT01621646	Table 3	Treatment	NA	ITT	Summary	Outcome	Nutrient bioavailability	Lutein	Lutein	Lutein	Blood	3	months	12	19	Mean	nmol/L	NA	NA	NA	NA	NA	SD	μmol/L	NA	NA	NA	NA	NA	NA	NA	NA	NA
5	Scott 2017	Intervention	NCT01621646	Table 3	Treatment	NA	ITT	Summary	Outcome	Nutrient bioavailability	Lutein	Lutein	Lutein	Blood	6	months	24	19	Mean	nmol/L	NA	NA	NA	NA	NA	SD	μmol/L	NA	NA	NA	NA	NA	NA	NA	NA	NA
5	Scott 2017	Intervention	NCT01621646	Table 3	Treatment	NA	ITT	Summary	Outcome	Nutrient bioavailability	Lutein	Lutein	Lutein	Blood	0	weeks	0	19	Mean	nmol/L	NA	NA	NA	NA	NA	SD	μmol/L	NA	NA	NA	NA	NA	NA	NA	NA	NA
5	Scott 2017	Intervention	NCT01621646	Table 3	Treatment	NA	ITT	Summary	Outcome	Nutrient bioavailability	Macular pigment optical density	Macular pigment optical density	MPD	NA	3	months	12	20	Mean	d.u	NA	NA	NA	NA	NA	SD	d.u	NA	NA	NA	NA	NA	NA	NA	NA	NA
5	Scott 2017	Intervention	NCT01621646	Table 3	Treatment	NA	ITT	Summary	Outcome	Nutrient bioavailability	Macular pigment optical density	Macular pigment optical density	MPD	NA	6	months	24	20	Mean	d.u	NA	NA	NA	NA	NA	SD	d.u	NA	NA	NA	NA	NA	NA	NA	NA	NA
5	Scott 2017	Intervention	NCT01621646	Table 3	Treatment	NA	ITT	Summary	Outcome	Nutrient bioavailability	Macular pigment optical density	Macular pigment optical density	MPD	NA	0	weeks	0	20	Mean	d.u	NA	NA	NA	NA	NA	SD	d.u	NA	NA	NA	NA	NA	NA	NA	NA	NA
5	Scott 2017	Intervention	NCT01621646	Table 3	Treatment	NA	ITT	Summary	Outcome	Lipids	Total cholesterol	Total cholesterol	Cholesterol	Blood	3	months	12	19	Mean	mg/dL	224	12.85	56	168	280	SD	mg/dL	224	224	220	220	12.8473	56	168	280	NA
5	Scott 2017	Intervention	NCT01621646	Table 3	Treatment	NA	ITT	Summary	Outcome	Lipids	Total cholesterol	Total cholesterol	Cholesterol	Blood	6	months	24	19	Mean	mg/dL	209	9.86	43	166	252	SD	mg/dL	209	209	205	200	9.86488	43	166	252	NA
5	Scott 2017	Intervention	NCT01621646	Table 3	Treatment	NA	ITT	Summary	Outcome	Lipids	Total cholesterol	Total cholesterol	Cholesterol	Blood	0	weeks	0	19	Mean	mg/dL	219	11.93	52	167	271	SD	mg/dL	219	219	215	210	11.9296	52	167	271	NA
5	Scott 2017	Intervention	NCT01621646	Table 3	Treatment	NA	ITT	Summary	Outcome	Lipids	Triglycerides	Triglycerides	Triglycerides	Blood	3	months	12	19	Mean	mg/dL	99	18.81	82	17	181	SD	mg/dL	99	99	95	90	18.8121	82	17	181	NA
5	Scott 2017	Intervention	NCT01621646	Table 3	Treatment	NA	ITT	Summary	Outcome	Lipids	Triglycerides	Triglycerides	Triglycerides	Blood	6	months	24	19	Mean	mg/dL	79	13.08	57	22	136	SD	mg/dL	79	79	75	70	13.0767	57	22	136	NA
5	Scott 2017	Intervention	NCT01621646	Table 3	Treatment	NA	ITT	Summary	Outcome	Lipids	Triglycerides	Triglycerides	Triglycerides	Blood	0	weeks	0	19	Mean	mg/dL	86	14.68	64	22	150	SD	mg/dL	86	86	85	80	14.6826	64	22	150	NA
5	Scott 2017	Intervention	NCT01621646	Table 3	Treatment	NA	ITT	Summary	Outcome	Nutrient bioavailability	Zeaxanthin	Zeaxanthin	Zeaxanthin	Blood	3	months	12	19	Mean	nmol/L	NA	NA	NA	NA	NA	SD	μmol/L	NA	NA	NA	NA	NA	NA	NA	NA	NA
5	Scott 2017	Intervention	NCT01621646	Table 3	Treatment	NA	ITT	Summary	Outcome	Nutrient bioavailability	Zeaxanthin	Zeaxanthin	Zeaxanthin	Blood	6	months	24	19	Mean	nmol/L	NA	NA	NA	NA	NA	SD	μmol/L	NA	NA	NA	NA	NA	NA	NA	NA	NA
5	Scott 2017	Intervention	NCT01621646	Table 3	Treatment	NA	ITT	Summary	Outcome	Nutrient bioavailability	Zeaxanthin	Zeaxanthin	Zeaxanthin	Blood	0	weeks	0	19	Mean	nmol/L	NA	NA	NA	NA	NA	SD	μmol/L	NA	NA	NA	NA	NA	NA	NA	NA	NA
5	Scott 2017	Intervention	NCT01621646	Table 3	Treatment	NA	ITT	Summary	Outcome	Immune	β-amyloid	β-amyloid	β-amyloid	Blood	3	months	12	19	Mean	pg/mL	NA	NA	NA	NA	NA	SD	pg/mL	NA	NA	NA	NA	NA	NA	NA	NA	NA
5	Scott 2017	Intervention	NCT01621646	Table 3	Treatment	NA	ITT	Summary	Outcome	Immune	β-amyloid	β-amyloid	β-amyloid	Blood	6	months	24	19	Mean	pg/mL	NA	NA	NA	NA	NA	SD	pg/mL	NA	NA	NA	NA	NA	NA	NA	NA	NA
5	Scott 2017	Intervention	NCT01621646	Table 3	Treatment	NA	ITT	Summary	Outcome	Immune	β-amyloid	β-amyloid	β-amyloid	Blood	0	weeks	0	19	Mean	pg/mL	NA	NA	NA	NA	NA	SD	pg/mL	NA	NA	NA	NA	NA	NA	NA	NA	NA
5	Scott 2017	Intervention	NCT01621646	Table 4	Control	NA	ITT	Summary	Outcome	Cognition	Choice reaction time	Choice reaction time	CRT	NA	3	months	12	20	Mean	msec	NA	NA	NA	NA	NA	SD	msec	NA	NA	NA	NA	NA	NA	NA	NA	NA
5	Scott 2017	Intervention	NCT01621646	Table 4	Control	NA	ITT	Summary	Outcome	Cognition	Choice reaction time	Choice reaction time	CRT	NA	6	months	24	20	Mean	msec	NA	NA	NA	NA	NA	SD	msec	NA	NA	NA	NA	NA	NA	NA	NA	NA
5	Scott 2017	Intervention	NCT01621646	Table 4	Control	NA	ITT	Summary	Outcome	Cognition	Choice reaction time	Choice reaction time	CRT	NA	0	weeks	0	20	Mean	msec	NA	NA	NA	NA	NA	SD	msec	NA	NA	NA	NA	NA	NA	NA	NA	NA
5	Scott 2017	Intervention	NCT01621646	Table 4	Control	NA	ITT	Summary	Outcome	Cognition	Delayed matching to sample	Delayed matching to sample	DMS	NA	3	months	12	20	Mean	% correct all delays	NA	NA	NA	NA	NA	SD	% correct all delays	NA	NA	NA	NA	NA	NA	NA	NA	NA
5	Scott 2017	Intervention	NCT01621646	Table 4	Control	NA	ITT	Summary	Outcome	Cognition	Delayed matching to sample	Delayed matching to sample	DMS	NA	6	months	24	20	Mean	% correct all delays	NA	NA	NA	NA	NA	SD	% correct all delays	NA	NA	NA	NA	NA	NA	NA	NA	NA
5	Scott 2017	Intervention	NCT01621646	Table 4	Control	NA	ITT	Summary	Outcome	Cognition	Delayed matching to sample	Delayed matching to sample	DMS	NA	0	weeks	0	20	Mean	% correct all delays	NA	NA	NA	NA	NA	SD	% correct all delays	NA	NA	NA	NA	NA	NA	NA	NA	NA
5	Scott 2017	Intervention	NCT01621646	Table 4	Control	NA	ITT	Summary	Outcome	Cognition	Paired associates learning	Paired associates learning	PAL	NA	3	months	12	20	Mean	total errors	NA	NA	NA	NA	NA	SD	total errors	NA	NA	NA	NA	NA	NA	NA	NA	NA
5	Scott 2017	Intervention	NCT01621646	Table 4	Control	NA	ITT	Summary	Outcome	Cognition	Paired associates learning	Paired associates learning	PAL	NA	6	months	24	20	Mean	total errors	NA	NA	NA	NA	NA	SD	total errors	NA	NA	NA	NA	NA	NA	NA	NA	NA
5	Scott 2017	Intervention	NCT01621646	Table 4	Control	NA	ITT	Summary	Outcome	Cognition	Paired associates learning	Paired associates learning	PAL	NA	0	weeks	0	20	Mean	total errors	NA	NA	NA	NA	NA	SD	total errors	NA	NA	NA	NA	NA	NA	NA	NA	NA
5	Scott 2017	Intervention	NCT01621646	Table 4	Control	NA	ITT	Summary	Outcome	Cognition	Rapid visual information processing	Rapid visual information processing	RVIP	NA	3	months	12	20	Mean	signal detection	NA	NA	NA	NA	NA	SD	signal detection	NA	NA	NA	NA	NA	NA	NA	NA	NA
5	Scott 2017	Intervention	NCT01621646	Table 4	Control	NA	ITT	Summary	Outcome	Cognition	Rapid visual information processing	Rapid visual information processing	RVIP	NA	6	months	24	20	Mean	signal detection	NA	NA	NA	NA	NA	SD	signal detection	NA	NA	NA	NA	NA	NA	NA	NA	NA
5	Scott 2017	Intervention	NCT01621646	Table 4	Control	NA	ITT	Summary	Outcome	Cognition	Rapid visual information processing	Rapid visual information processing	RVIP	NA	0	weeks	0	20	Mean	signal detection	NA	NA	NA	NA	NA	SD	signal detection	NA	NA	NA	NA	NA	NA	NA	NA	NA
5	Scott 2017	Intervention	NCT01621646	Table 4	Control	NA	ITT	Summary	Outcome	Cognition	Spatial span forward	Spatial span forward	SS Forward	NA	3	months	12	20	Mean	highest span	NA	NA	NA	NA	NA	SD	highest span	NA	NA	NA	NA	NA	NA	NA	NA	NA
5	Scott 2017	Intervention	NCT01621646	Table 4	Control	NA	ITT	Summary	Outcome	Cognition	Spatial span forward	Spatial span forward	SS Forward	NA	6	months	24	20	Mean	highest span	NA	NA	NA	NA	NA	SD	highest span	NA	NA	NA	NA	NA	NA	NA	NA	NA
5	Scott 2017	Intervention	NCT01621646	Table 4	Control	NA	ITT	Summary	Outcome	Cognition	Spatial span forward	Spatial span forward	SS Forward	NA	0	weeks	0	20	Mean	highest span	NA	NA	NA	NA	NA	SD	highest span	NA	NA	NA	NA	NA	NA	NA	NA	NA
5	Scott 2017	Intervention	NCT01621646	Table 4	Control	NA	ITT	Summary	Outcome	Cognition	Spatial span reverse	Spatial span reverse	SS Reverse	NA	3	months	12	20	Mean	highest span	NA	NA	NA	NA	NA	SD	highest span	NA	NA	NA	NA	NA	NA	NA	NA	NA
5	Scott 2017	Intervention	NCT01621646	Table 4	Control	NA	ITT	Summary	Outcome	Cognition	Spatial span reverse	Spatial span reverse	SS Reverse	NA	6	months	24	20	Mean	highest span	NA	NA	NA	NA	NA	SD	highest span	NA	NA	NA	NA	NA	NA	NA	NA	NA
5	Scott 2017	Intervention	NCT01621646	Table 4	Control	NA	ITT	Summary	Outcome	Cognition	Spatial span reverse	Spatial span reverse	SS Reverse	NA	0	weeks	0	20	Mean	highest span	NA	NA	NA	NA	NA	SD	highest span	NA	NA	NA	NA	NA	NA	NA	NA	NA
5	Scott 2017	Intervention	NCT01621646	Table 4	Control	NA	ITT	Summary	Outcome	Cognition	Spatial working memory	Spatial working memory	SWM	NA	3	months	12	20	Mean	errors	NA	NA	NA	NA	NA	SD	errors	NA	NA	NA	NA	NA	NA	NA	NA	NA
5	Scott 2017	Intervention	NCT01621646	Table 4	Control	NA	ITT	Summary	Outcome	Cognition	Spatial working memory	Spatial working memory	SWM	NA	6	months	24	20	Mean	errors	NA	NA	NA	NA	NA	SD	errors	NA	NA	NA	NA	NA	NA	NA	NA	NA
5	Scott 2017	Intervention	NCT01621646	Table 4	Control	NA	ITT	Summary	Outcome	Cognition	Spatial working memory	Spatial working memory	SWM	NA	0	weeks	0	20	Mean	errors	NA	NA	NA	NA	NA	SD	errors	NA	NA	NA	NA	NA	NA	NA	NA	NA
5	Scott 2017	Intervention	NCT01621646	Table 4	Control	NA	ITT	Summary	Outcome	Cognition	Stockings of Cambridge	Stockings of Cambridge	SOC	NA	3	months	12	20	Mean	nr completed in min moves	NA	NA	NA	NA	NA	SD	nr completed in min moves	NA	NA	NA	NA	NA	NA	NA	NA	NA
5	Scott 2017	Intervention	NCT01621646	Table 4	Control	NA	ITT	Summary	Outcome	Cognition	Stockings of Cambridge	Stockings of Cambridge	SOC	NA	6	months	24	20	Mean	nr completed in min moves	NA	NA	NA	NA	NA	SD	nr completed in min moves	NA	NA	NA	NA	NA	NA	NA	NA	NA
5	Scott 2017	Intervention	NCT01621646	Table 4	Control	NA	ITT	Summary	Outcome	Cognition	Stockings of Cambridge	Stockings of Cambridge	SOC	NA	0	weeks	0	20	Mean	nr completed in min moves	NA	NA	NA	NA	NA	SD	nr completed in min moves	NA	NA	NA	NA	NA	NA	NA	NA	NA
5	Scott 2017	Intervention	NCT01621646	Table 4	Treatment	NA	ITT	Summary	Outcome	Cognition	Choice reaction time	Choice reaction time	CRT	NA	3	months	12	20	Mean	msec	NA	NA	NA	NA	NA	SD	msec	NA	NA	NA	NA	NA	NA	NA	NA	NA
5	Scott 2017	Intervention	NCT01621646	Table 4	Treatment	NA	ITT	Summary	Outcome	Cognition	Choice reaction time	Choice reaction time	CRT	NA	6	months	24	20	Mean	msec	NA	NA	NA	NA	NA	SD	msec	NA	NA	NA	NA	NA	NA	NA	NA	NA
5	Scott 2017	Intervention	NCT01621646	Table 4	Treatment	NA	ITT	Summary	Outcome	Cognition	Choice reaction time	Choice reaction time	CRT	NA	0	weeks	0	20	Mean	msec	NA	NA	NA	NA	NA	SD	msec	NA	NA	NA	NA	NA	NA	NA	NA	NA
5	Scott 2017	Intervention	NCT01621646	Table 4	Treatment	NA	ITT	Summary	Outcome	Cognition	Delayed matching to sample	Delayed matching to sample	DMS	NA	3	months	12	20	Mean	% correct all delays	NA	NA	NA	NA	NA	SD	% correct all delays	NA	NA	NA	NA	NA	NA	NA	NA	NA
5	Scott 2017	Intervention	NCT01621646	Table 4	Treatment	NA	ITT	Summary	Outcome	Cognition	Delayed matching to sample	Delayed matching to sample	DMS	NA	6	months	24	20	Mean	% correct all delays	NA	NA	NA	NA	NA	SD	% correct all delays	NA	NA	NA	NA	NA	NA	NA	NA	NA
5	Scott 2017	Intervention	NCT01621646	Table 4	Treatment	NA	ITT	Summary	Outcome	Cognition	Delayed matching to sample	Delayed matching to sample	DMS	NA	0	weeks	0	20	Mean	% correct all delays	NA	NA	NA	NA	NA	SD	% correct all delays	NA	NA	NA	NA	NA	NA	NA	NA	NA
5	Scott 2017	Intervention	NCT01621646	Table 4	Treatment	NA	ITT	Summary	Outcome	Cognition	Paired associates learning	Paired associates learning	PAL	NA	3	months	12	20	Mean	total errors	NA	NA	NA	NA	NA	SD	total errors	NA	NA	NA	NA	NA	NA	NA	NA	NA
5	Scott 2017	Intervention	NCT01621646	Table 4	Treatment	NA	ITT	Summary	Outcome	Cognition	Paired associates learning	Paired associates learning	PAL	NA	6	months	24	20	Mean	total errors	NA	NA	NA	NA	NA	SD	total errors	NA	NA	NA	NA	NA	NA	NA	NA	NA
5	Scott 2017	Intervention	NCT01621646	Table 4	Treatment	NA	ITT	Summary	Outcome	Cognition	Paired associates learning	Paired associates learning	PAL	NA	0	weeks	0	20	Mean	total errors	NA	NA	NA	NA	NA	SD	total errors	NA	NA	NA	NA	NA	NA	NA	NA	NA
5	Scott 2017	Intervention	NCT01621646	Table 4	Treatment	NA	ITT	Summary	Outcome	Cognition	Rapid visual information processing	Rapid visual information processing	RVIP	NA	3	months	12	20	Mean	signal detection	NA	NA	NA	NA	NA	SD	signal detection	NA	NA	NA	NA	NA	NA	NA	NA	NA
5	Scott 2017	Intervention	NCT01621646	Table 4	Treatment	NA	ITT	Summary	Outcome	Cognition	Rapid visual information processing	Rapid visual information processing	RVIP	NA	6	months	24	20	Mean	signal detection	NA	NA	NA	NA	NA	SD	signal detection	NA	NA	NA	NA	NA	NA	NA	NA	NA
5	Scott 2017	Intervention	NCT01621646	Table 4	Treatment	NA	ITT	Summary	Outcome	Cognition	Rapid visual information processing	Rapid visual information processing	RVIP	NA	0	weeks	0	20	Mean	signal detection	NA	NA	NA	NA	NA	SD	signal detection	NA	NA	NA	NA	NA	NA	NA	NA	NA
5	Scott 2017	Intervention	NCT01621646	Table 4	Treatment	NA	ITT	Summary	Outcome	Cognition	Spatial span forward	Spatial span forward	SS Forward	NA	3	months	12	20	Mean	highest span	NA	NA	NA	NA	NA	SD	highest span	NA	NA	NA	NA	NA	NA	NA	NA	NA
5	Scott 2017	Intervention	NCT01621646	Table 4	Treatment	NA	ITT	Summary	Outcome	Cognition	Spatial span forward	Spatial span forward	SS Forward	NA	6	months	24	20	Mean	highest span	NA	NA	NA	NA	NA	SD	highest span	NA	NA	NA	NA	NA	NA	NA	NA	NA
5	Scott 2017	Intervention	NCT01621646	Table 4	Treatment	NA	ITT	Summary	Outcome	Cognition	Spatial span forward	Spatial span forward	SS Forward	NA	0	weeks	0	20	Mean	highest span	NA	NA	NA	NA	NA	SD	highest span	NA	NA	NA	NA	NA	NA	NA	NA	NA
5	Scott 2017	Intervention	NCT01621646	Table 4	Treatment	NA	ITT	Summary	Outcome	Cognition	Spatial span reverse	Spatial span reverse	SS Reverse	NA	3	months	12	20	Mean	highest span	NA	NA	NA	NA	NA	SD	highest span	NA	NA	NA	NA	NA	NA	NA	NA	NA
5	Scott 2017	Intervention	NCT01621646	Table 4	Treatment	NA	ITT	Summary	Outcome	Cognition	Spatial span reverse	Spatial span reverse	SS Reverse	NA	6	months	24	20	Mean	highest span	NA	NA	NA	NA	NA	SD	highest span	NA	NA	NA	NA	NA	NA	NA	NA	NA
5	Scott 2017	Intervention	NCT01621646	Table 4	Treatment	NA	ITT	Summary	Outcome	Cognition	Spatial span reverse	Spatial span reverse	SS Reverse	NA	0	weeks	0	20	Mean	highest span	NA	NA	NA	NA	NA	SD	highest span	NA	NA	NA	NA	NA	NA	NA	NA	NA
5	Scott 2017	Intervention	NCT01621646	Table 4	Treatment	NA	ITT	Summary	Outcome	Cognition	Spatial working memory	Spatial working memory	SWM	NA	3	months	12	20	Mean	errors	NA	NA	NA	NA	NA	SD	errors	NA	NA	NA	NA	NA	NA	NA	NA	NA
5	Scott 2017	Intervention	NCT01621646	Table 4	Treatment	NA	ITT	Summary	Outcome	Cognition	Spatial working memory	Spatial working memory	SWM	NA	6	months	24	20	Mean	errors	NA	NA	NA	NA	NA	SD	errors	NA	NA	NA	NA	NA	NA	NA	NA	NA
5	Scott 2017	Intervention	NCT01621646	Table 4	Treatment	NA	ITT	Summary	Outcome	Cognition	Spatial working memory	Spatial working memory	SWM	NA	0	weeks	0	20	Mean	errors	NA	NA	NA	NA	NA	SD	errors	NA	NA	NA	NA	NA	NA	NA	NA	NA
5	Scott 2017	Intervention	NCT01621646	Table 4	Treatment	NA	ITT	Summary	Outcome	Cognition	Stockings of Cambridge	Stockings of Cambridge	SOC	NA	3	months	12	20	Mean	nr completed in min moves	NA	NA	NA	NA	NA	SD	nr completed in min moves	NA	NA	NA	NA	NA	NA	NA	NA	NA
5	Scott 2017	Intervention	NCT01621646	Table 4	Treatment	NA	ITT	Summary	Outcome	Cognition	Stockings of Cambridge	Stockings of Cambridge	SOC	NA	6	months	24	20	Mean	nr completed in min moves	NA	NA	NA	NA	NA	SD	nr completed in min moves	NA	NA	NA	NA	NA	NA	NA	NA	NA
5	Scott 2017	Intervention	NCT01621646	Table 4	Treatment	NA	ITT	Summary	Outcome	Cognition	Stockings of Cambridge	Stockings of Cambridge	SOC	NA	0	weeks	0	20	Mean	nr completed in min moves	NA	NA	NA	NA	NA	SD	nr completed in min moves	NA	NA	NA	NA	NA	NA	NA	NA	NA
6	Park 2018	Intervention	NCT02479048	Figure 3	Control Meal	NA	PP	Summary	Outcome	Glycemia	Glucose	Glucose	Glucose	Plasma		NA		31	NA	mmol/L	NA	NA	NA	NA	NA	NA	mg/dL	NA	NA	NA	NA	NA	NA	NA	NA	NA
6	Park 2018	Intervention	NCT02479048	Figure 3	Control Meal	NA	PP	Summary	Outcome	Glycemia	Insulin	Insulin	Insulin	Plasma		NA		31	NA	pmol/L	NA	NA	NA	NA	NA	NA	pmol/L	NA	NA	NA	NA	NA	NA	NA	NA	NA
6	Park 2018	Intervention	NCT02479048	Figure 3	Half Avocado Meal	NA	PP	Summary	Outcome	Glycemia	Glucose	Glucose	Glucose	Plasma		NA		31	NA	mmol/L	NA	NA	NA	NA	NA	NA	mg/dL	NA	NA	NA	NA	NA	NA	NA	NA	NA
6	Park 2018	Intervention	NCT02479048	Figure 3	Half Avocado Meal	NA	PP	Summary	Outcome	Glycemia	Insulin	Insulin	Insulin	Plasma		NA		31	NA	pmol/L	NA	NA	NA	NA	NA	NA	pmol/L	NA	NA	NA	NA	NA	NA	NA	NA	NA
6	Park 2018	Intervention	NCT02479048	Figure 3	Whole Avocado Meal	NA	PP	Summary	Outcome	Glycemia	Glucose	Glucose	Glucose	Plasma		NA		31	NA	mmol/L	NA	NA	NA	NA	NA	NA	mg/dL	NA	NA	NA	NA	NA	NA	NA	NA	NA
6	Park 2018	Intervention	NCT02479048	Figure 3	Whole Avocado Meal	NA	PP	Summary	Outcome	Glycemia	Insulin	Insulin	Insulin	Plasma		NA		31	NA	pmol/L	NA	NA	NA	NA	NA	NA	pmol/L	NA	NA	NA	NA	NA	NA	NA	NA	NA
6	Park 2018	Intervention	NCT02479048	Figure 4	Control Meal	NA	PP	Summary	Outcome	CVD risk factors	Vasodilation	Flow-mediated vasodilation	Flow-mediated vasodilation	Plasma		NA		23	NA	%	NA	NA	NA	NA	NA	NA	%	NA	NA	NA	NA	NA	NA	NA	NA	NA
6	Park 2018	Intervention	NCT02479048	Figure 4	Half Avocado Meal	NA	PP	Summary	Outcome	CVD risk factors	Vasodilation	Flow-mediated vasodilation	Flow-mediated vasodilation	Plasma		NA		23	NA	%	NA	NA	NA	NA	NA	NA	%	NA	NA	NA	NA	NA	NA	NA	NA	NA
6	Park 2018	Intervention	NCT02479048	Figure 4	Whole Avocado Meal	NA	PP	Summary	Outcome	CVD risk factors	Vasodilation	Flow-mediated vasodilation	Flow-mediated vasodilation	Plasma		NA		23	NA	%	NA	NA	NA	NA	NA	NA	%	NA	NA	NA	NA	NA	NA	NA	NA	NA
6	Park 2018	Intervention	NCT02479048	Methods section	Control meal	NA	Planned	Summary	Dietary	Avocado intake	Avocado intake	Avocado intake	Avocado intake	NA		NA		31	Absolute value	g per test meal	0					NA	g/test meal	0	0	0	0					NA
6	Park 2018	Intervention	NCT02479048	Methods section	Half avocado meal	NA	Planned	Summary	Dietary	Avocado intake	Avocado intake	Avocado intake	Avocado intake	NA		NA		31	Absolute value	g per test meal	68					NA	g/test meal	68	68	65	60					NA
6	Park 2018	Intervention	NCT02479048	Methods section	Whole avocado meal	NA	Planned	Summary	Dietary	Avocado intake	Avocado intake	Avocado intake	Avocado intake	NA		NA		31	Absolute value	g per test meal	136					NA	g/test meal	136	136	135	130					NA
6	Park 2018	Intervention	NCT02479048	Supplementary Figure 4	Control Meal	NA	PP	Summary	Outcome	Lipids	Particle concentration	IDL particle concentration	IDL particle concentration	Blood		NA		31	NA	nmol/L	NA	NA	NA	NA	NA	NA	nmol/L	NA	NA	NA	NA	NA	NA	NA	NA	NA
6	Park 2018	Intervention	NCT02479048	Supplementary Figure 4	Whole Avocado Meal	NA	PP	Summary	Outcome	Lipids	Particle concentration	IDL particle concentration	IDL particle concentration	Blood		NA		31	NA	nmol/L	NA	NA	NA	NA	NA	NA	nmol/L	NA	NA	NA	NA	NA	NA	NA	NA	NA
6	Park 2018	Intervention	NCT02479048	Table 3	All	NA	PP	Summary	Subject Characteristics	Age	Age	Age	Age	NA		NA		31	Mean	years	37.9	1.85	10.3	27.6	48.2	SD	years	37.9	37	35	30	1.84993	10.3	27.6	48.2	NA
6	Park 2018	Intervention	NCT02479048	Table 3	All	NA	PP	Summary	Subject Characteristics	CVD risk factors	Blood pressure	Diastolic blood pressure	Diastolic blood pressure	NA		NA		31	Mean	mmHg	NA	NA	NA	NA	NA	SD	mmHg	NA	NA	NA	NA	NA	NA	NA	NA	NA
6	Park 2018	Intervention	NCT02479048	Table 3	All	NA	PP	Summary	Subject Characteristics	CVD risk factors	Blood pressure	Systolic blood pressure	Systolic blood pressure	NA		NA		31	Mean	mmHg	NA	NA	NA	NA	NA	SD	mmHg	NA	NA	NA	NA	NA	NA	NA	NA	NA
6	Park 2018	Intervention	NCT02479048	Table 3	All	NA	PP	Summary	Subject Characteristics	Anthropometry	BMI	BMI	BMI	NA		NA		31	Mean	kg/m^2	29	0.43	2.4	26.6	31.4	SD	kg/m^2	29	29	25	20	0.431053	2.4	26.6	31.4	NA
6	Park 2018	Intervention	NCT02479048	Table 3	All	NA	PP	Summary	Subject Characteristics	Anthropometry	Body size	Waist circumference	Mid-point waist circumference	NA		NA		31	Mean	cm	NA	NA	NA	NA	NA	SD	cm	NA	NA	NA	NA	NA	NA	NA	NA	NA
6	Park 2018	Intervention	NCT02479048	Table 3	All	NA	PP	Summary	Subject Characteristics	Metabolic	Glucose	Fasting glucose	Venous fasting glucose concentration	NA		NA		31	Mean	mmol/L	NA	NA	NA	NA	NA	SD	mg/dL	NA	NA	NA	NA	NA	NA	NA	NA	NA
6	Park 2018	Intervention	NCT02479048	Table 3	All	NA	PP	Summary	Subject Characteristics	Metabolic	Insulin	Fasting insulin	Venous fasting insulin concentration	NA		NA		31	Mean	pmol/L	NA	NA	NA	NA	NA	SD	pmol/L	NA	NA	NA	NA	NA	NA	NA	NA	NA
6	Park 2018	Intervention	NCT02479048	Table 3	All	NA	PP	Summary	Subject Characteristics	Race	Race	African-American	Race/Ethnicity, African-American	NA		NA		31	Count	Count	NA	NA	NA	NA	NA	NA	Count	NA	NA	NA	NA	NA	NA	NA	NA	NA
6	Park 2018	Intervention	NCT02479048	Table 3	All	NA	PP	Summary	Subject Characteristics	Race	Race	African-American	Race/Ethnicity, African-American	NA		NA		31	Percentage	%	NA	NA	NA	NA	NA	NA	%	NA	NA	NA	NA	NA	NA	NA	NA	NA
6	Park 2018	Intervention	NCT02479048	Table 3	All	NA	PP	Summary	Subject Characteristics	Race	Race	Asian	Race/Ethnicity, Asian	NA		NA		31	Count	Count	NA	NA	NA	NA	NA	NA	Count	NA	NA	NA	NA	NA	NA	NA	NA	NA
6	Park 2018	Intervention	NCT02479048	Table 3	All	NA	PP	Summary	Subject Characteristics	Race	Race	Asian	Race/Ethnicity, Asian	NA		NA		31	Percentage	%	NA	NA	NA	NA	NA	NA	%	NA	NA	NA	NA	NA	NA	NA	NA	NA
6	Park 2018	Intervention	NCT02479048	Table 3	All	NA	PP	Summary	Subject Characteristics	Race	Race	Caucasian	Race/Ethnicity, Caucasian	NA		NA		31	Count	Count	NA	NA	NA	NA	NA	NA	Count	NA	NA	NA	NA	NA	NA	NA	NA	NA
6	Park 2018	Intervention	NCT02479048	Table 3	All	NA	PP	Summary	Subject Characteristics	Race	Race	Caucasian	Race/Ethnicity, Caucasian	NA		NA		31	Percentage	%	NA	NA	NA	NA	NA	NA	%	NA	NA	NA	NA	NA	NA	NA	NA	NA
6	Park 2018	Intervention	NCT02479048	Table 3	All	NA	PP	Summary	Subject Characteristics	Race	Race	Hispanic	Race/Ethnicity, Hispanic	NA		NA		31	Count	Count	NA	NA	NA	NA	NA	NA	Count	NA	NA	NA	NA	NA	NA	NA	NA	NA
6	Park 2018	Intervention	NCT02479048	Table 3	All	NA	PP	Summary	Subject Characteristics	Race	Race	Hispanic	Race/Ethnicity, Hispanic	NA		NA		31	Percentage	%	NA	NA	NA	NA	NA	NA	%	NA	NA	NA	NA	NA	NA	NA	NA	NA
6	Park 2018	Intervention	NCT02479048	Table 3	All	NA	PP	Summary	Subject Characteristics	Sex	Sex	Female	Gender, Female	NA		NA		31	Count	Count	16					NA	Count	16	16	15	10					NA
6	Park 2018	Intervention	NCT02479048	Table 3	All	NA	PP	Summary	Subject Characteristics	Sex	Sex	Female	Gender, Female	NA		NA		31	Percentage	%	52					NA	%	52	52	50	50					NA
6	Park 2018	Intervention	NCT02479048	Table 3	All	NA	PP	Summary	Subject Characteristics	Sex	Sex	Male	Gender, Male	NA		NA		31	Count	Count	15					NA	Count	15	15	15	10					NA
6	Park 2018	Intervention	NCT02479048	Table 3	All	NA	PP	Summary	Subject Characteristics	Sex	Sex	Male	Gender, Male	NA		NA		31	Percentage	%	48					NA	%	48	48	45	40					NA
6	Park 2018	Intervention	NCT02479048	Table 3	All	NA	PP	Summary	Subject Characteristics	Anthropometry	Weight groups	Obese I	BMI Categories, Obese I	NA		NA		31	Count	Count	NA	NA	NA	NA	NA	NA	Count	NA	NA	NA	NA	NA	NA	NA	NA	NA
6	Park 2018	Intervention	NCT02479048	Table 3	All	NA	PP	Summary	Subject Characteristics	Anthropometry	Weight groups	Obese I	BMI Categories, Obese I	NA		NA		31	Percentage	%	NA	NA	NA	NA	NA	NA	%	NA	NA	NA	NA	NA	NA	NA	NA	NA
6	Park 2018	Intervention	NCT02479048	Table 3	All	NA	PP	Summary	Subject Characteristics	Anthropometry	Weight groups	Overweight	BMI Categories, Overweight	NA		NA		31	Count	Count	NA	NA	NA	NA	NA	NA	Count	NA	NA	NA	NA	NA	NA	NA	NA	NA
6	Park 2018	Intervention	NCT02479048	Table 3	All	NA	PP	Summary	Subject Characteristics	Anthropometry	Weight groups	Overweight	BMI Categories, Overweight	NA		NA		31	Percentage	%	NA	NA	NA	NA	NA	NA	%	NA	NA	NA	NA	NA	NA	NA	NA	NA
6	Park 2018	Intervention	NCT02479048	Table 4	Control Meal	NA	PP	Summary	Outcome	Lipids	Particle concentration	HDL Particle concentration, Large 6h	HDL Particle concentration, Large 6h	Blood		NA		31	Mean	nmol/L	NA	NA	NA	NA	NA	SD	nmol/L	NA	NA	NA	NA	NA	NA	NA	NA	NA
6	Park 2018	Intervention	NCT02479048	Table 4	Control Meal	NA	PP	Summary	Outcome	Lipids	Particle concentration	HDL Particle concentration, Medium 6h	HDL Particle concentration, Medium 6h	Blood		NA		31	Mean	nmol/L	NA	NA	NA	NA	NA	SD	nmol/L	NA	NA	NA	NA	NA	NA	NA	NA	NA
6	Park 2018	Intervention	NCT02479048	Table 4	Control Meal	NA	PP	Summary	Outcome	Lipids	Particle concentration	HDL Particle concentration, Small 6h	HDL Particle concentration, Small 6h	Blood		NA		31	Mean	nmol/L	NA	NA	NA	NA	NA	SD	nmol/L	NA	NA	NA	NA	NA	NA	NA	NA	NA
6	Park 2018	Intervention	NCT02479048	Table 4	Control Meal	NA	PP	Summary	Outcome	Lipids	Particle concentration	HDL Particle concentration, Total 6h	HDL Particle concentration, Total 6h	Blood		NA		31	Mean	nmol/L	NA	NA	NA	NA	NA	SD	nmol/L	NA	NA	NA	NA	NA	NA	NA	NA	NA
6	Park 2018	Intervention	NCT02479048	Table 4	Control Meal	NA	PP	Summary	Outcome	Lipids	Particle concentration	LDL Particle concentration, Large 6h	LDL Particle concentration, Large 6h	Blood		NA		31	Mean	nmol/L	NA	NA	NA	NA	NA	SD	nmol/L	NA	NA	NA	NA	NA	NA	NA	NA	NA
6	Park 2018	Intervention	NCT02479048	Table 4	Control Meal	NA	PP	Summary	Outcome	Lipids	Particle concentration	LDL Particle concentration, Medium 6h	LDL Particle concentration, Medium 6h	Blood		NA		31	Mean	nmol/L	NA	NA	NA	NA	NA	SD	nmol/L	NA	NA	NA	NA	NA	NA	NA	NA	NA
6	Park 2018	Intervention	NCT02479048	Table 4	Control Meal	NA	PP	Summary	Outcome	Lipids	Particle concentration	LDL Particle concentration, Small 6h	LDL Particle concentration, Small 6h	Blood		NA		31	Mean	nmol/L	NA	NA	NA	NA	NA	SD	nmol/L	NA	NA	NA	NA	NA	NA	NA	NA	NA
6	Park 2018	Intervention	NCT02479048	Table 4	Control Meal	NA	PP	Summary	Outcome	Lipids	Particle concentration	LDL Particle concentration, Total 6h	LDL Particle concentration, Total 6h	Blood		NA		31	Mean	nmol/L	NA	NA	NA	NA	NA	SD	nmol/L	NA	NA	NA	NA	NA	NA	NA	NA	NA
6	Park 2018	Intervention	NCT02479048	Table 4	Control Meal	NA	PP	Summary	Outcome	Lipids	Particle concentration	VLDL Particle concentraction, Large 6h	Chylomicron/VLDL Particle concentraction, Large 6h	Blood		NA		31	Mean	nmol/L	NA	NA	NA	NA	NA	SD	nmol/L	NA	NA	NA	NA	NA	NA	NA	NA	NA
6	Park 2018	Intervention	NCT02479048	Table 4	Control Meal	NA	PP	Summary	Outcome	Lipids	Particle concentration	VLDL Particle concentraction, Medium 6h	Chylomicron/VLDL Particle concentraction, Medium 6h	Blood		NA		31	Mean	nmol/L	NA	NA	NA	NA	NA	SD	nmol/L	NA	NA	NA	NA	NA	NA	NA	NA	NA
6	Park 2018	Intervention	NCT02479048	Table 4	Control Meal	NA	PP	Summary	Outcome	Lipids	Particle concentration	VLDL Particle concentraction, Small 6h	Chylomicron/VLDL Particle concentraction, Small 6h	Blood		NA		31	Mean	nmol/L	NA	NA	NA	NA	NA	SD	nmol/L	NA	NA	NA	NA	NA	NA	NA	NA	NA
6	Park 2018	Intervention	NCT02479048	Table 4	Control Meal	NA	PP	Summary	Outcome	Lipids	Particle concentration	VLDL Particle concentraction, Total 6h	Chylomicron/VLDL Particle concentraction, Total 6h	Blood		NA		31	Mean	nmol/L	NA	NA	NA	NA	NA	SD	nmol/L	NA	NA	NA	NA	NA	NA	NA	NA	NA
6	Park 2018	Intervention	NCT02479048	Table 4	Control Meal	NA	PP	Summary	Outcome	Lipids	Particle size	Average Particle size, HDL 6h	Average Particle size, HDL 6h	Blood		NA		31	Mean	nm	NA	NA	NA	NA	NA	SD	nm	NA	NA	NA	NA	NA	NA	NA	NA	NA
6	Park 2018	Intervention	NCT02479048	Table 4	Control Meal	NA	PP	Summary	Outcome	Lipids	Particle size	Average Particle size, LDL 6h	Average Particle size, LDL 6h	Blood		NA		31	Mean	nm	NA	NA	NA	NA	NA	SD	nm	NA	NA	NA	NA	NA	NA	NA	NA	NA
6	Park 2018	Intervention	NCT02479048	Table 4	Control Meal	NA	PP	Summary	Outcome	Lipids	Particle size	Average Particle size, VLDL 6h	Average Particle size, VLDL 6h	Blood		NA		31	Mean	nm	NA	NA	NA	NA	NA	SD	nm	NA	NA	NA	NA	NA	NA	NA	NA	NA
6	Park 2018	Intervention	NCT02479048	Table 4	Whole Avocado Meal	NA	PP	Summary	Outcome	Lipids	Particle concentration	HDL Particle concentration, Large 6h	HDL Particle concentration, Large 6h	Blood		NA		31	Mean	nmol/L	NA	NA	NA	NA	NA	SD	nmol/L	NA	NA	NA	NA	NA	NA	NA	NA	NA
6	Park 2018	Intervention	NCT02479048	Table 4	Whole Avocado Meal	NA	PP	Summary	Outcome	Lipids	Particle concentration	HDL Particle concentration, Medium 6h	HDL Particle concentration, Medium 6h	Blood		NA		31	Mean	nmol/L	NA	NA	NA	NA	NA	SD	nmol/L	NA	NA	NA	NA	NA	NA	NA	NA	NA
6	Park 2018	Intervention	NCT02479048	Table 4	Whole Avocado Meal	NA	PP	Summary	Outcome	Lipids	Particle concentration	HDL Particle concentration, Small 6h	HDL Particle concentration, Small 6h	Blood		NA		31	Mean	nmol/L	NA	NA	NA	NA	NA	SD	nmol/L	NA	NA	NA	NA	NA	NA	NA	NA	NA
6	Park 2018	Intervention	NCT02479048	Table 4	Whole Avocado Meal	NA	PP	Summary	Outcome	Lipids	Particle concentration	HDL Particle concentration, Total 6h	HDL Particle concentration, Total 6h	Blood		NA		31	Mean	nmol/L	NA	NA	NA	NA	NA	SD	nmol/L	NA	NA	NA	NA	NA	NA	NA	NA	NA
6	Park 2018	Intervention	NCT02479048	Table 4	Whole Avocado Meal	NA	PP	Summary	Outcome	Lipids	Particle concentration	LDL Particle concentration, Large 6h	LDL Particle concentration, Large 6h	Blood		NA		31	Mean	nmol/L	NA	NA	NA	NA	NA	SD	nmol/L	NA	NA	NA	NA	NA	NA	NA	NA	NA
6	Park 2018	Intervention	NCT02479048	Table 4	Whole Avocado Meal	NA	PP	Summary	Outcome	Lipids	Particle concentration	LDL Particle concentration, Medium 6h	LDL Particle concentration, Medium 6h	Blood		NA		31	Mean	nmol/L	NA	NA	NA	NA	NA	SD	nmol/L	NA	NA	NA	NA	NA	NA	NA	NA	NA
6	Park 2018	Intervention	NCT02479048	Table 4	Whole Avocado Meal	NA	PP	Summary	Outcome	Lipids	Particle concentration	LDL Particle concentration, Small 6h	LDL Particle concentration, Small 6h	Blood		NA		31	Mean	nmol/L	NA	NA	NA	NA	NA	SD	nmol/L	NA	NA	NA	NA	NA	NA	NA	NA	NA
6	Park 2018	Intervention	NCT02479048	Table 4	Whole Avocado Meal	NA	PP	Summary	Outcome	Lipids	Particle concentration	LDL Particle concentration, Total 6h	LDL Particle concentration, Total 6h	Blood		NA		31	Mean	nmol/L	NA	NA	NA	NA	NA	SD	nmol/L	NA	NA	NA	NA	NA	NA	NA	NA	NA
6	Park 2018	Intervention	NCT02479048	Table 4	Whole Avocado Meal	NA	PP	Summary	Outcome	Lipids	Particle concentration	VLDL Particle concentraction, Large 6h	Chylomicron/VLDL Particle concentraction, Large 6h	Blood		NA		31	Mean	nmol/L	NA	NA	NA	NA	NA	SD	nmol/L	NA	NA	NA	NA	NA	NA	NA	NA	NA
6	Park 2018	Intervention	NCT02479048	Table 4	Whole Avocado Meal	NA	PP	Summary	Outcome	Lipids	Particle concentration	VLDL Particle concentraction, Medium 6h	Chylomicron/VLDL Particle concentraction, Medium 6h	Blood		NA		31	Mean	nmol/L	NA	NA	NA	NA	NA	SD	nmol/L	NA	NA	NA	NA	NA	NA	NA	NA	NA
6	Park 2018	Intervention	NCT02479048	Table 4	Whole Avocado Meal	NA	PP	Summary	Outcome	Lipids	Particle concentration	VLDL Particle concentraction, Small 6h	Chylomicron/VLDL Particle concentraction, Small 6h	Blood		NA		31	Mean	nmol/L	NA	NA	NA	NA	NA	SD	nmol/L	NA	NA	NA	NA	NA	NA	NA	NA	NA
6	Park 2018	Intervention	NCT02479048	Table 4	Whole Avocado Meal	NA	PP	Summary	Outcome	Lipids	Particle concentration	VLDL Particle concentraction, Total 6h	Chylomicron/VLDL Particle concentraction, Total 6h	Blood		NA		31	Mean	nmol/L	NA	NA	NA	NA	NA	SD	nmol/L	NA	NA	NA	NA	NA	NA	NA	NA	NA
6	Park 2018	Intervention	NCT02479048	Table 4	Whole Avocado Meal	NA	PP	Summary	Outcome	Lipids	Particle size	Average Particle size, HDL 6h	Average Particle size, HDL 6h	Blood		NA		31	Mean	nm	NA	NA	NA	NA	NA	SD	nm	NA	NA	NA	NA	NA	NA	NA	NA	NA
6	Park 2018	Intervention	NCT02479048	Table 4	Whole Avocado Meal	NA	PP	Summary	Outcome	Lipids	Particle size	Average Particle size, LDL 6h	Average Particle size, LDL 6h	Blood		NA		31	Mean	nm	NA	NA	NA	NA	NA	SD	nm	NA	NA	NA	NA	NA	NA	NA	NA	NA
6	Park 2018	Intervention	NCT02479048	Table 4	Whole Avocado Meal	NA	PP	Summary	Outcome	Lipids	Particle size	Average Particle size, VLDL 6h	Average Particle size, VLDL 6h	Blood		NA		31	Mean	nm	NA	NA	NA	NA	NA	SD	nm	NA	NA	NA	NA	NA	NA	NA	NA	NA
8	Wang 2015	Intervention	NCT01235832	Methods section	Avocado diet	NA	Planned	Summary	Dietary	Avocado intake	Avocado intake	Avocado intake	Avocado intake	NA		NA		43	Average	g/d	136					NA	g/d	136	136	135	130					NA
8	Wang 2015	Intervention	NCT01235832	Methods section	Baseline Average American Diet	NA	Planned	Summary	Dietary	Avocado intake	Avocado intake	Avocado intake	Avocado intake	NA		NA		45	Average	g/d	0					NA	g/d	0	0	0	0					NA
8	Wang 2015	Intervention	NCT01235832	Methods section	Baseline Average American Diet	NA	ITT	Summary	Subject Characteristics	Race	Race	African-American	African-American	NA		NA		45	Count	Count	NA	NA	NA	NA	NA	NA	Count	NA	NA	NA	NA	NA	NA	NA	NA	NA
8	Wang 2015	Intervention	NCT01235832	Methods section	Baseline Average American Diet	NA	ITT	Summary	Subject Characteristics	Race	Race	African-American	African-American	NA		NA		45	Percentage	%	NA	NA	NA	NA	NA	NA	%	NA	NA	NA	NA	NA	NA	NA	NA	NA
8	Wang 2015	Intervention	NCT01235832	Methods section	Baseline Average American Diet	NA	ITT	Summary	Subject Characteristics	Race	Race	Asian	Asian	NA		NA		45	Count	Count	NA	NA	NA	NA	NA	NA	Count	NA	NA	NA	NA	NA	NA	NA	NA	NA
8	Wang 2015	Intervention	NCT01235832	Methods section	Baseline Average American Diet	NA	ITT	Summary	Subject Characteristics	Race	Race	Asian	Asian	NA		NA		45	Percentage	%	NA	NA	NA	NA	NA	NA	%	NA	NA	NA	NA	NA	NA	NA	NA	NA
8	Wang 2015	Intervention	NCT01235832	Methods section	Baseline Average American Diet	NA	ITT	Summary	Subject Characteristics	Race	Race	Caucasian	Caucasian and non-Hispanic	NA		NA		45	Count	Count	NA	NA	NA	NA	NA	NA	Count	NA	NA	NA	NA	NA	NA	NA	NA	NA
8	Wang 2015	Intervention	NCT01235832	Methods section	Baseline Average American Diet	NA	ITT	Summary	Subject Characteristics	Race	Race	Caucasian	Caucasian and non-Hispanic	NA		NA		45	Percentage	%	NA	NA	NA	NA	NA	NA	%	NA	NA	NA	NA	NA	NA	NA	NA	NA
8	Wang 2015	Intervention	NCT01235832	Methods section	Baseline Average American Diet	NA	ITT	Summary	Subject Characteristics	Sex	Sex	Female	Female	NA		NA		45	Count	Count	18					NA	Count	18	18	15	10					NA
8	Wang 2015	Intervention	NCT01235832	Methods section	Baseline Average American Diet	NA	ITT	Summary	Subject Characteristics	Sex	Sex	Female	Female	NA		NA		45	Percentage	%	40					NA	%	40	40	40	40					NA
8	Wang 2015	Intervention	NCT01235832	Methods section	Baseline Average American Diet	NA	ITT	Summary	Subject Characteristics	Sex	Sex	Male	Male	NA		NA		45	Count	Count	27					NA	Count	27	27	25	20					NA
8	Wang 2015	Intervention	NCT01235832	Methods section	Baseline Average American Diet	NA	ITT	Summary	Subject Characteristics	Sex	Sex	Male	Male	NA		NA		45	Percentage	%	60					NA	%	60	60	60	60					NA
8	Wang 2015	Intervention	NCT01235832	Methods section	Lower-Fat	NA	Planned	Summary	Dietary	Avocado intake	Avocado intake	Avocado intake	Avocado intake	NA		NA		43	Average	g/d	0					NA	g/d	0	0	0	0					NA
8	Wang 2015	Intervention	NCT01235832	Methods section	Moderate-Fat	NA	Planned	Summary	Dietary	Avocado intake	Avocado intake	Avocado intake	Avocado intake	NA		NA		42	Average	g/d	0					NA	g/d	0	0	0	0					NA
8	Wang 2015	Intervention	NCT01235832	Table 1	Avocado diet	NA	PP	Summary	Dietary	Macronutrients	Carbohydrates	Carbohydrates	CHO	NA		NA		43	Absolute value	%E	NA	NA	NA	NA	NA	NA	%E	NA	NA	NA	NA	NA	NA	NA	NA	NA
8	Wang 2015	Intervention	NCT01235832	Table 1	Avocado diet	NA	PP	Summary	Dietary	Cholesterol	Cholesterol	Cholesterol	Cholesterol	NA		NA		43	Absolute value	mg/d	NA	NA	NA	NA	NA	NA	mg/d	NA	NA	NA	NA	NA	NA	NA	NA	NA
8	Wang 2015	Intervention	NCT01235832	Table 1	Avocado diet	NA	PP	Summary	Dietary	Macronutrients	Fat	Fat	Total fat	NA		NA		43	Absolute value	%E	NA	NA	NA	NA	NA	NA	%E	NA	NA	NA	NA	NA	NA	NA	NA	NA
8	Wang 2015	Intervention	NCT01235832	Table 1	Avocado diet	NA	PP	Summary	Dietary	Fiber	Fiber	Fiber	Fiber	NA		NA		43	Absolute value	g/d	NA	NA	NA	NA	NA	NA	g/d	NA	NA	NA	NA	NA	NA	NA	NA	NA
8	Wang 2015	Intervention	NCT01235832	Table 1	Avocado diet	NA	PP	Summary	Dietary	Fatty acids	MUFA	MUFA	Total fat, MUFA	NA		NA		43	Absolute value	%E	NA	NA	NA	NA	NA	NA	%E	NA	NA	NA	NA	NA	NA	NA	NA	NA
8	Wang 2015	Intervention	NCT01235832	Table 1	Avocado diet	NA	PP	Summary	Dietary	Macronutrients	Protein	Protein	PRO	NA		NA		43	Absolute value	%E	NA	NA	NA	NA	NA	NA	%E	NA	NA	NA	NA	NA	NA	NA	NA	NA
8	Wang 2015	Intervention	NCT01235832	Table 1	Avocado diet	NA	PP	Summary	Dietary	Fatty acids	PUFA	PUFA	Total fat, PUFA	NA		NA		43	Absolute value	%E	NA	NA	NA	NA	NA	NA	%E	NA	NA	NA	NA	NA	NA	NA	NA	NA
8	Wang 2015	Intervention	NCT01235832	Table 1	Avocado diet	NA	PP	Summary	Dietary	Fatty acids	SFA	SFA	Total fat, SFA	NA		NA		43	Absolute value	%E	NA	NA	NA	NA	NA	NA	%E	NA	NA	NA	NA	NA	NA	NA	NA	NA
8	Wang 2015	Intervention	NCT01235832	Table 1	Baseline Average American Diet	NA	ITT	Summary	Dietary	Macronutrients	Carbohydrates	Carbohydrates	CHO	NA		NA		45	Absolute value	%E	NA	NA	NA	NA	NA	NA	%E	NA	NA	NA	NA	NA	NA	NA	NA	NA
8	Wang 2015	Intervention	NCT01235832	Table 1	Baseline Average American Diet	NA	ITT	Summary	Dietary	Cholesterol	Cholesterol	Cholesterol	Cholesterol	NA		NA		45	Absolute value	mg/d	NA	NA	NA	NA	NA	NA	mg/d	NA	NA	NA	NA	NA	NA	NA	NA	NA
8	Wang 2015	Intervention	NCT01235832	Table 1	Baseline Average American Diet	NA	ITT	Summary	Dietary	Macronutrients	Fat	Fat	Total fat	NA		NA		45	Absolute value	%E	NA	NA	NA	NA	NA	NA	%E	NA	NA	NA	NA	NA	NA	NA	NA	NA
8	Wang 2015	Intervention	NCT01235832	Table 1	Baseline Average American Diet	NA	ITT	Summary	Dietary	Fiber	Fiber	Fiber	Fiber	NA		NA		45	Absolute value	g/d	NA	NA	NA	NA	NA	NA	g/d	NA	NA	NA	NA	NA	NA	NA	NA	NA
8	Wang 2015	Intervention	NCT01235832	Table 1	Baseline Average American Diet	NA	ITT	Summary	Dietary	Fatty acids	MUFA	MUFA	Total fat, MUFA	NA		NA		45	Absolute value	%E	NA	NA	NA	NA	NA	NA	%E	NA	NA	NA	NA	NA	NA	NA	NA	NA
8	Wang 2015	Intervention	NCT01235832	Table 1	Baseline Average American Diet	NA	ITT	Summary	Dietary	Macronutrients	Protein	Protein	PRO	NA		NA		45	Absolute value	%E	NA	NA	NA	NA	NA	NA	%E	NA	NA	NA	NA	NA	NA	NA	NA	NA
8	Wang 2015	Intervention	NCT01235832	Table 1	Baseline Average American Diet	NA	ITT	Summary	Dietary	Fatty acids	PUFA	PUFA	Total fat, PUFA	NA		NA		45	Absolute value	%E	NA	NA	NA	NA	NA	NA	%E	NA	NA	NA	NA	NA	NA	NA	NA	NA
8	Wang 2015	Intervention	NCT01235832	Table 1	Baseline Average American Diet	NA	ITT	Summary	Dietary	Fatty acids	SFA	SFA	Total fat, SFA	NA		NA		45	Absolute value	%E	NA	NA	NA	NA	NA	NA	%E	NA	NA	NA	NA	NA	NA	NA	NA	NA
8	Wang 2015	Intervention	NCT01235832	Table 1	Lower-Fat	NA	PP	Summary	Dietary	Macronutrients	Carbohydrates	Carbohydrates	CHO	NA		NA		43	Absolute value	%E	NA	NA	NA	NA	NA	NA	%E	NA	NA	NA	NA	NA	NA	NA	NA	NA
8	Wang 2015	Intervention	NCT01235832	Table 1	Lower-Fat	NA	PP	Summary	Dietary	Cholesterol	Cholesterol	Cholesterol	Cholesterol	NA		NA		43	Absolute value	mg/d	NA	NA	NA	NA	NA	NA	mg/d	NA	NA	NA	NA	NA	NA	NA	NA	NA
8	Wang 2015	Intervention	NCT01235832	Table 1	Lower-Fat	NA	PP	Summary	Dietary	Macronutrients	Fat	Fat	Total fat	NA		NA		43	Absolute value	%E	NA	NA	NA	NA	NA	NA	%E	NA	NA	NA	NA	NA	NA	NA	NA	NA
8	Wang 2015	Intervention	NCT01235832	Table 1	Lower-Fat	NA	PP	Summary	Dietary	Fiber	Fiber	Fiber	Fiber	NA		NA		43	Absolute value	g/d	NA	NA	NA	NA	NA	NA	g/d	NA	NA	NA	NA	NA	NA	NA	NA	NA
8	Wang 2015	Intervention	NCT01235832	Table 1	Lower-Fat	NA	PP	Summary	Dietary	Fatty acids	MUFA	MUFA	Total fat, MUFA	NA		NA		43	Absolute value	%E	NA	NA	NA	NA	NA	NA	%E	NA	NA	NA	NA	NA	NA	NA	NA	NA
8	Wang 2015	Intervention	NCT01235832	Table 1	Lower-Fat	NA	PP	Summary	Dietary	Macronutrients	Protein	Protein	PRO	NA		NA		43	Absolute value	%E	NA	NA	NA	NA	NA	NA	%E	NA	NA	NA	NA	NA	NA	NA	NA	NA
8	Wang 2015	Intervention	NCT01235832	Table 1	Lower-Fat	NA	PP	Summary	Dietary	Fatty acids	PUFA	PUFA	Total fat, PUFA	NA		NA		43	Absolute value	%E	NA	NA	NA	NA	NA	NA	%E	NA	NA	NA	NA	NA	NA	NA	NA	NA
8	Wang 2015	Intervention	NCT01235832	Table 1	Lower-Fat	NA	PP	Summary	Dietary	Fatty acids	SFA	SFA	Total fat, SFA	NA		NA		43	Absolute value	%E	NA	NA	NA	NA	NA	NA	%E	NA	NA	NA	NA	NA	NA	NA	NA	NA
8	Wang 2015	Intervention	NCT01235832	Table 1	Moderate-Fat	NA	PP	Summary	Dietary	Macronutrients	Carbohydrates	Carbohydrates	CHO	NA		NA		42	Absolute value	%E	NA	NA	NA	NA	NA	NA	%E	NA	NA	NA	NA	NA	NA	NA	NA	NA
8	Wang 2015	Intervention	NCT01235832	Table 1	Moderate-Fat	NA	PP	Summary	Dietary	Cholesterol	Cholesterol	Cholesterol	Cholesterol	NA		NA		42	Absolute value	mg/d	NA	NA	NA	NA	NA	NA	mg/d	NA	NA	NA	NA	NA	NA	NA	NA	NA
8	Wang 2015	Intervention	NCT01235832	Table 1	Moderate-Fat	NA	PP	Summary	Dietary	Macronutrients	Fat	Fat	Total fat	NA		NA		42	Absolute value	%E	NA	NA	NA	NA	NA	NA	%E	NA	NA	NA	NA	NA	NA	NA	NA	NA
8	Wang 2015	Intervention	NCT01235832	Table 1	Moderate-Fat	NA	PP	Summary	Dietary	Fiber	Fiber	Fiber	Fiber	NA		NA		42	Absolute value	g/d	NA	NA	NA	NA	NA	NA	g/d	NA	NA	NA	NA	NA	NA	NA	NA	NA
8	Wang 2015	Intervention	NCT01235832	Table 1	Moderate-Fat	NA	PP	Summary	Dietary	Fatty acids	MUFA	MUFA	Total fat, MUFA	NA		NA		42	Absolute value	%E	NA	NA	NA	NA	NA	NA	%E	NA	NA	NA	NA	NA	NA	NA	NA	NA
8	Wang 2015	Intervention	NCT01235832	Table 1	Moderate-Fat	NA	PP	Summary	Dietary	Macronutrients	Protein	Protein	PRO	NA		NA		42	Absolute value	%E	NA	NA	NA	NA	NA	NA	%E	NA	NA	NA	NA	NA	NA	NA	NA	NA
8	Wang 2015	Intervention	NCT01235832	Table 1	Moderate-Fat	NA	PP	Summary	Dietary	Fatty acids	PUFA	PUFA	Total fat, PUFA	NA		NA		42	Absolute value	%E	NA	NA	NA	NA	NA	NA	%E	NA	NA	NA	NA	NA	NA	NA	NA	NA
8	Wang 2015	Intervention	NCT01235832	Table 1	Moderate-Fat	NA	PP	Summary	Dietary	Fatty acids	SFA	SFA	Total fat, SFA	NA		NA		42	Absolute value	%E	NA	NA	NA	NA	NA	NA	%E	NA	NA	NA	NA	NA	NA	NA	NA	NA
8	Wang 2015	Intervention	NCT01235832	Table 3	Baseline Average American Diet	NA	ITT	Summary	Subject Characteristics	Age	Age	Age	Age	NA		NA		45	Mean	years	45	1.98	13.3	21	70	min,max	years	45	45	45	40	1.98265	13.3	21	70	NA
8	Wang 2015	Intervention	NCT01235832	Table 3	Baseline Average American Diet	NA	ITT	Summary	Subject Characteristics	CVD risk factors	Blood pressure	Diastolic blood pressure	DBP	NA		NA		45	Mean	mmHg	NA	NA	NA	NA	NA	SD	mmHg	NA	NA	NA	NA	NA	NA	NA	NA	NA
8	Wang 2015	Intervention	NCT01235832	Table 3	Baseline Average American Diet	NA	ITT	Summary	Subject Characteristics	CVD risk factors	Blood pressure	Systolic blood pressure	SBP	NA		NA		45	Mean	mmHg	NA	NA	NA	NA	NA	SD	mmHg	NA	NA	NA	NA	NA	NA	NA	NA	NA
8	Wang 2015	Intervention	NCT01235832	Table 3	Baseline Average American Diet	NA	ITT	Summary	Subject Characteristics	Anthropometry	BMI	BMI	BMI	NA		NA		45	Mean	kg/m^2	28.2	0.36	2.4	25	35	min,max	kg/m^2	28.2	28	25	20	0.357771	2.4	25	35	NA
8	Wang 2015	Intervention	NCT01235832	Table 3	Baseline Average American Diet	NA	ITT	Summary	Subject Characteristics	Immune	CRP	hsCRP	hsCRP	NA		NA		45	Median	mg/L	NA	NA	NA	NA	NA	IQR	mg/L	NA	NA	NA	NA	NA	NA	NA	NA	NA
8	Wang 2015	Intervention	NCT01235832	Table 3	Baseline Average American Diet	NA	ITT	Summary	Subject Characteristics	Metabolic	Glucose	Glucose	Glucose	NA		NA		45	Mean	mg/dL	NA	NA	NA	NA	NA	SD	mg/dL	NA	NA	NA	NA	NA	NA	NA	NA	NA
8	Wang 2015	Intervention	NCT01235832	Table 3	Baseline Average American Diet	NA	ITT	Summary	Subject Characteristics	Lipids	HDL-C	HDL-C	HDL-C	NA		NA		45	Mean	mg/dL	48.7	1.8	12.1	36.6	60.8	SD	mg/dL	48.7	48	45	40	1.80376	12.1	36.6	60.8	NA
8	Wang 2015	Intervention	NCT01235832	Table 3	Baseline Average American Diet	NA	ITT	Summary	Subject Characteristics	Metabolic	Insulin	Insulin	Insulin	NA		NA		45	Median	µIU/mL	NA	NA	NA	NA	NA	IQR	pmol/L	NA	NA	NA	NA	NA	NA	NA	NA	NA
8	Wang 2015	Intervention	NCT01235832	Table 3	Baseline Average American Diet	NA	ITT	Summary	Subject Characteristics	Lipids	LDL-C	LDL-C	LDL-C	NA		NA		45	Mean	mg/dL	128.1	3.89	26.1	102	154.2	SD	mg/dL	128.1	128	125	120	3.89076	26.1	102	154.2	NA
8	Wang 2015	Intervention	NCT01235832	Table 3	Baseline Average American Diet	NA	ITT	Summary	Subject Characteristics	Lipids	Total cholesterol	Total cholesterol	TC	NA		NA		45	Mean	mg/dL	199.9	4.83	32.4	167.5	232.3	SD	mg/dL	199.9	199	195	190	4.82991	32.4	167.5	232.3	NA
8	Wang 2015	Intervention	NCT01235832	Table 3	Baseline Average American Diet	NA	ITT	Summary	Subject Characteristics	Lipids	Triglycerides	Triglycerides	TG	NA		NA		45	Mean	mg/dL	114	5.9	39.6	74.4	153.6	SD	mg/dL	114	114	110	110	5.90322	39.6	74.4	153.6	NA
8	Wang 2015	Intervention	NCT01235832	Table 4	Baseline Average American Diet	40-69 years old participants	ITT	Summary	Subject Characteristics	Health status	Cardiovascular diseases	ASCVD 10yr risk < 5%	ASCVD 10yr risk < 5%	NA		NA		26	Count	Count	NA	NA	NA	NA	NA	NA	Count	NA	NA	NA	NA	NA	NA	NA	NA	NA
8	Wang 2015	Intervention	NCT01235832	Table 4	Baseline Average American Diet	40-69 years old participants	ITT	Summary	Subject Characteristics	Health status	Cardiovascular diseases	ASCVD 10yr risk 10-20%	ASCVD 10yr risk 10-20%	NA		NA		26	Count	Count	NA	NA	NA	NA	NA	NA	Count	NA	NA	NA	NA	NA	NA	NA	NA	NA
8	Wang 2015	Intervention	NCT01235832	Table 4	Baseline Average American Diet	40-69 years old participants	ITT	Summary	Subject Characteristics	Health status	Cardiovascular diseases	ASCVD 10yr risk 5-10%	ASCVD 10yr risk 5-10%	NA		NA		26	Count	Count	NA	NA	NA	NA	NA	NA	Count	NA	NA	NA	NA	NA	NA	NA	NA	NA
8	Wang 2015	Intervention	NCT01235832	Table 4	Baseline Average American Diet	20-59 years old participants	ITT	Summary	Subject Characteristics	Health status	Cardiovascular diseases	ASCVD lifetime risk 10-30%	ASCVD lifetime risk 10-30%	NA		NA		39	Count	Count	NA	NA	NA	NA	NA	NA	Count	NA	NA	NA	NA	NA	NA	NA	NA	NA
8	Wang 2015	Intervention	NCT01235832	Table 4	Baseline Average American Diet	20-59 years old participants	ITT	Summary	Subject Characteristics	Health status	Cardiovascular diseases	ASCVD lifetime risk 30-50%	ASCVD lifetime risk 30-50%	NA		NA		39	Count	Count	NA	NA	NA	NA	NA	NA	Count	NA	NA	NA	NA	NA	NA	NA	NA	NA
8	Wang 2015	Intervention	NCT01235832	Table 4	Baseline Average American Diet	20-59 years old participants	ITT	Summary	Subject Characteristics	Health status	Cardiovascular diseases	ASCVD lifetime risk 5-10%	ASCVD lifetime risk 5-10%	NA		NA		39	Count	Count	NA	NA	NA	NA	NA	NA	Count	NA	NA	NA	NA	NA	NA	NA	NA	NA
8	Wang 2015	Intervention	NCT01235832	Table 4	Baseline Average American Diet	NA	ITT	Summary	Subject Characteristics	Health status	Metabolic syndrome	MetS risk factors, 0	MetS risk factors, 0	NA		NA		45	Count	Count	NA	NA	NA	NA	NA	NA	Count	NA	NA	NA	NA	NA	NA	NA	NA	NA
8	Wang 2015	Intervention	NCT01235832	Table 4	Baseline Average American Diet	NA	ITT	Summary	Subject Characteristics	Health status	Metabolic syndrome	MetS risk factors, 1-2	MetS risk factors, 1-2	NA		NA		45	Count	Count	NA	NA	NA	NA	NA	NA	Count	NA	NA	NA	NA	NA	NA	NA	NA	NA
8	Wang 2015	Intervention	NCT01235832	Table 4	Baseline Average American Diet	NA	ITT	Summary	Subject Characteristics	Health status	Metabolic syndrome	MetS risk factors, 3-4	MetS risk factors, 3-4	NA		NA		45	Count	Count	NA	NA	NA	NA	NA	NA	Count	NA	NA	NA	NA	NA	NA	NA	NA	NA
8	Wang 2015	Intervention	NCT01235832	Table 5	Avocado diet	NA	PP	Summary	Outcome	Lipids	Apolipoprotein	ApoA1	Apolipoproteins, ApoA1	Blood	5	weeks	5	43	Mean	mg/L	NA	NA	NA	NA	NA	SD	mg/L	NA	NA	NA	NA	NA	NA	NA	NA	NA
8	Wang 2015	Intervention	NCT01235832	Table 5	Avocado diet	NA	PP	Summary	Outcome	Lipids	Apolipoprotein	ApoB	Apolipoproteins, ApoB	Blood	5	weeks	5	43	Mean	mg/L	NA	NA	NA	NA	NA	SD	mg/L	NA	NA	NA	NA	NA	NA	NA	NA	NA
8	Wang 2015	Intervention	NCT01235832	Table 5	Avocado diet	NA	PP	Summary	Outcome	Lipids	Apolipoprotein	ApoB:ApoA1	Apolipoproteins, ApoB:ApoA1	Blood	5	weeks	5	43	Mean	mg/L	NA	NA	NA	NA	NA	SD	mg/L	NA	NA	NA	NA	NA	NA	NA	NA	NA
8	Wang 2015	Intervention	NCT01235832	Table 5	Avocado diet	NA	PP	Summary	Outcome	Lipids	Apolipoprotein	Apolipoprotein A	Cholesterol, LP(a)	Blood	5	weeks	5	43	Mean	mg/dL	NA	NA	NA	NA	NA	SD	mg/dL	NA	NA	NA	NA	NA	NA	NA	NA	NA
8	Wang 2015	Intervention	NCT01235832	Table 5	Avocado diet	NA	PP	Summary	Outcome	CVD risk factors	Blood pressure	Diastolic blood pressure	Blood pressure, DBP	NA	5	weeks	5	43	Mean	mmHg	NA	NA	NA	NA	NA	SD	mmHg	NA	NA	NA	NA	NA	NA	NA	NA	NA
8	Wang 2015	Intervention	NCT01235832	Table 5	Avocado diet	NA	PP	Summary	Outcome	CVD risk factors	Blood pressure	Systolic blood pressure	Blood pressure, SBP	NA	5	weeks	5	43	Mean	mmHg	NA	NA	NA	NA	NA	SD	mmHg	NA	NA	NA	NA	NA	NA	NA	NA	NA
8	Wang 2015	Intervention	NCT01235832	Table 5	Avocado diet	NA	PP	Summary	Outcome	Lipids	Cholesterol ratios	LDL-C:HDL-C	Lipoprotein ratios, LDL:HDL-C	Blood	5	weeks	5	43	Mean	ratio	NA	NA	NA	NA	NA	SD	ratio	NA	NA	NA	NA	NA	NA	NA	NA	NA
8	Wang 2015	Intervention	NCT01235832	Table 5	Avocado diet	NA	PP	Summary	Outcome	Lipids	Cholesterol ratios	TG:HDL-C	Lipoprotein ratios, TG:HDL-C	Blood	5	weeks	5	43	Mean	ratio	NA	NA	NA	NA	NA	SD	ratio	NA	NA	NA	NA	NA	NA	NA	NA	NA
8	Wang 2015	Intervention	NCT01235832	Table 5	Avocado diet	NA	PP	Summary	Outcome	Lipids	Cholesterol ratios	Total cholesterol:HDL-C	Lipoprotein ratios, TC:HDL-C	Blood	5	weeks	5	43	Mean	ratio	NA	NA	NA	NA	NA	SD	ratio	NA	NA	NA	NA	NA	NA	NA	NA	NA
8	Wang 2015	Intervention	NCT01235832	Table 5	Avocado diet	NA	PP	Summary	Outcome	Immune	CRP	hsCRP	hsCRP	Blood	5	weeks	5	43	Mean	mg/L	NA	NA	NA	NA	NA	SD	mg/L	NA	NA	NA	NA	NA	NA	NA	NA	NA
8	Wang 2015	Intervention	NCT01235832	Table 5	Avocado diet	NA	PP	Summary	Outcome	Glycemia	Glucose	Glucose	Glucose	Blood	5	weeks	5	43	Mean	mg/dL	NA	NA	NA	NA	NA	SD	mg/dL	NA	NA	NA	NA	NA	NA	NA	NA	NA
8	Wang 2015	Intervention	NCT01235832	Table 5	Avocado diet	NA	PP	Summary	Outcome	Lipids	HDL-C	HDL-C	Cholesterol, HDL-C	Blood	5	weeks	5	43	Mean	mg/dL	46.9	1.6	10.49	36.41	57.39	SD	mg/dL	46.9	46	45	40	1.6	10.4919	36.4081	57.3919	NA
8	Wang 2015	Intervention	NCT01235832	Table 5	Avocado diet	NA	PP	Summary	Outcome	Glycemia	HOMA	HOMA-IR	HOMA	Blood	5	weeks	5	43	Mean	score	NA	NA	NA	NA	NA	SD	score	NA	NA	NA	NA	NA	NA	NA	NA	NA
8	Wang 2015	Intervention	NCT01235832	Table 5	Avocado diet	NA	PP	Summary	Outcome	Lipids	IDL-C	IDL-C	Cholesterol, IDL-C	Blood	5	weeks	5	43	Mean	mg/dL	NA	NA	NA	NA	NA	SD	mg/dL	NA	NA	NA	NA	NA	NA	NA	NA	NA
8	Wang 2015	Intervention	NCT01235832	Table 5	Avocado diet	NA	PP	Summary	Outcome	Glycemia	Insulin	Insulin	Insulin	Blood	5	weeks	5	43	Mean	uIU/mL	NA	NA	NA	NA	NA	SD	pmol/L	NA	NA	NA	NA	NA	NA	NA	NA	NA
8	Wang 2015	Intervention	NCT01235832	Table 5	Avocado diet	NA	PP	Summary	Outcome	Lipids	LDL-C	LDL-C	Cholesterol, LDL-C	Blood	5	weeks	5	43	Mean	mg/dL	113.7	3.4	22.3	91.4	136	SD	mg/dL	113.7	113	110	110	3.4	22.2953	91.4047	135.995	NA
8	Wang 2015	Intervention	NCT01235832	Table 5	Avocado diet	NA	PP	Summary	Outcome	Lipids	Non HDL-C	Non HDL-C	Cholesterol, Non-HDL-C	Blood	5	weeks	5	43	Mean	mg/dL	NA	NA	NA	NA	NA	SD	mg/dL	NA	NA	NA	NA	NA	NA	NA	NA	NA
8	Wang 2015	Intervention	NCT01235832	Table 5	Avocado diet	NA	PP	Summary	Outcome	Lipids	Total cholesterol	Total cholesterol	Cholesterol, total	Blood	5	weeks	5	43	Mean	mg/dL	182.2	4.3	28.2	154	210.4	SD	mg/dL	182.2	182	180	180	4.3	28.197	154.003	210.397	NA
8	Wang 2015	Intervention	NCT01235832	Table 5	Avocado diet	NA	PP	Summary	Outcome	Lipids	Triglycerides	Triglycerides	Triglycerides	Blood	5	weeks	5	43	Mean	mg/dL	108.6	7.2	47.21	61.39	155.81	SD	mg/dL	108.6	108	105	100	7.2	47.2136	61.3864	155.814	NA
8	Wang 2015	Intervention	NCT01235832	Table 5	Avocado diet	NA	PP	Summary	Outcome	Lipids	VLDL-C	VLDL-C	Cholesterol, VLDL-C	Blood	5	weeks	5	43	Mean	mg/dL	NA	NA	NA	NA	NA	SD	mg/dL	NA	NA	NA	NA	NA	NA	NA	NA	NA
8	Wang 2015	Intervention	NCT01235832	Table 5	Baseline Average American Diet	NA	ITT	Summary	Outcome	Lipids	Cholesterol ratios	LDL-C:HDL-C	Lipoprotein ratios, LDL:HDL-C	Blood	2	weeks	2	45	Mean	ratio	NA	NA	NA	NA	NA	SD	ratio	NA	NA	NA	NA	NA	NA	NA	NA	NA
8	Wang 2015	Intervention	NCT01235832	Table 5	Baseline Average American Diet	NA	ITT	Summary	Outcome	Lipids	Cholesterol ratios	TG:HDL-C	Lipoprotein ratios, TG:HDL-C	Blood	2	weeks	2	45	Mean	ratio	NA	NA	NA	NA	NA	SD	ratio	NA	NA	NA	NA	NA	NA	NA	NA	NA
8	Wang 2015	Intervention	NCT01235832	Table 5	Baseline Average American Diet	NA	ITT	Summary	Outcome	Lipids	Cholesterol ratios	Total cholesterol:HDL-C	Lipoprotein ratios, TC:HDL-C	Blood	2	weeks	2	45	Mean	ratio	NA	NA	NA	NA	NA	SD	ratio	NA	NA	NA	NA	NA	NA	NA	NA	NA
8	Wang 2015	Intervention	NCT01235832	Table 5	Baseline Average American Diet	NA	ITT	Summary	Outcome	Immune	CRP	hsCRP	hsCRP	Blood	2	weeks	2	45	Mean	mg/L	NA	NA	NA	NA	NA	SD	mg/L	NA	NA	NA	NA	NA	NA	NA	NA	NA
8	Wang 2015	Intervention	NCT01235832	Table 5	Baseline Average American Diet	NA	ITT	Summary	Outcome	Glycemia	HOMA	HOMA-IR	HOMA	Blood	2	weeks	2	45	Mean	score	NA	NA	NA	NA	NA	SD	score	NA	NA	NA	NA	NA	NA	NA	NA	NA
8	Wang 2015	Intervention	NCT01235832	Table 5	Baseline Average American Diet	NA	ITT	Summary	Outcome	Glycemia	Insulin	Insulin	Insulin	Blood	2	weeks	2	45	Mean	uIU/mL	NA	NA	NA	NA	NA	SD	pmol/L	NA	NA	NA	NA	NA	NA	NA	NA	NA
8	Wang 2015	Intervention	NCT01235832	Table 5	Baseline Average American Diet	NA	ITT	Summary	Outcome	Lipids	Triglycerides	Triglycerides	Triglycerides	Blood	2	weeks	2	45	Mean	mg/dL	114	5.9	39.58	74.42	153.58	SD	mg/dL	114	114	110	110	5.9	39.5784	74.4216	153.578	NA
8	Wang 2015	Intervention	NCT01235832	Table 5	Lower-Fat	NA	PP	Summary	Outcome	Lipids	Apolipoprotein	ApoA1	Apolipoproteins, ApoA1	Blood	5	weeks	5	43	Mean	mg/L	NA	NA	NA	NA	NA	SD	mg/L	NA	NA	NA	NA	NA	NA	NA	NA	NA
8	Wang 2015	Intervention	NCT01235832	Table 5	Lower-Fat	NA	PP	Summary	Outcome	Lipids	Apolipoprotein	ApoB	Apolipoproteins, ApoB	Blood	5	weeks	5	43	Mean	mg/L	NA	NA	NA	NA	NA	SD	mg/L	NA	NA	NA	NA	NA	NA	NA	NA	NA
8	Wang 2015	Intervention	NCT01235832	Table 5	Lower-Fat	NA	PP	Summary	Outcome	Lipids	Apolipoprotein	ApoB:ApoA1	Apolipoproteins, ApoB:ApoA1	Blood	5	weeks	5	43	Mean	mg/L	NA	NA	NA	NA	NA	SD	mg/L	NA	NA	NA	NA	NA	NA	NA	NA	NA
8	Wang 2015	Intervention	NCT01235832	Table 5	Lower-Fat	NA	PP	Summary	Outcome	Lipids	Apolipoprotein	Apolipoprotein A	Cholesterol, LP(a)	Blood	5	weeks	5	43	Mean	mg/dL	NA	NA	NA	NA	NA	SD	mg/dL	NA	NA	NA	NA	NA	NA	NA	NA	NA
8	Wang 2015	Intervention	NCT01235832	Table 5	Lower-Fat	NA	PP	Summary	Outcome	CVD risk factors	Blood pressure	Diastolic blood pressure	Blood pressure, DBP	NA	5	weeks	5	43	Mean	mmHg	NA	NA	NA	NA	NA	SD	mmHg	NA	NA	NA	NA	NA	NA	NA	NA	NA
8	Wang 2015	Intervention	NCT01235832	Table 5	Lower-Fat	NA	PP	Summary	Outcome	CVD risk factors	Blood pressure	Systolic blood pressure	Blood pressure, SBP	NA	5	weeks	5	43	Mean	mmHg	NA	NA	NA	NA	NA	SD	mmHg	NA	NA	NA	NA	NA	NA	NA	NA	NA
8	Wang 2015	Intervention	NCT01235832	Table 5	Lower-Fat	NA	PP	Summary	Outcome	Lipids	Cholesterol ratios	LDL-C:HDL-C	Lipoprotein ratios, LDL:HDL-C	Blood	5	weeks	5	43	Mean	ratio	NA	NA	NA	NA	NA	SD	ratio	NA	NA	NA	NA	NA	NA	NA	NA	NA
8	Wang 2015	Intervention	NCT01235832	Table 5	Lower-Fat	NA	PP	Summary	Outcome	Lipids	Cholesterol ratios	TG:HDL-C	Lipoprotein ratios, TG:HDL-C	Blood	5	weeks	5	43	Mean	ratio	NA	NA	NA	NA	NA	SD	ratio	NA	NA	NA	NA	NA	NA	NA	NA	NA
8	Wang 2015	Intervention	NCT01235832	Table 5	Lower-Fat	NA	PP	Summary	Outcome	Lipids	Cholesterol ratios	Total cholesterol:HDL-C	Lipoprotein ratios, TC:HDL-C	Blood	5	weeks	5	43	Mean	ratio	NA	NA	NA	NA	NA	SD	ratio	NA	NA	NA	NA	NA	NA	NA	NA	NA
8	Wang 2015	Intervention	NCT01235832	Table 5	Lower-Fat	NA	PP	Summary	Outcome	Immune	CRP	hsCRP	hsCRP	Blood	5	weeks	5	43	Mean	mg/L	NA	NA	NA	NA	NA	SD	mg/L	NA	NA	NA	NA	NA	NA	NA	NA	NA
8	Wang 2015	Intervention	NCT01235832	Table 5	Lower-Fat	NA	PP	Summary	Outcome	Glycemia	Glucose	Glucose	Glucose	Blood	5	weeks	5	43	Mean	mg/dL	NA	NA	NA	NA	NA	SD	mg/dL	NA	NA	NA	NA	NA	NA	NA	NA	NA
8	Wang 2015	Intervention	NCT01235832	Table 5	Lower-Fat	NA	PP	Summary	Outcome	Lipids	HDL-C	HDL-C	Cholesterol, HDL-C	Blood	5	weeks	5	43	Mean	mg/dL	44.8	1.5	9.84	34.96	54.64	SD	mg/dL	44.8	44	40	40	1.5	9.83616	34.9638	54.6362	NA
8	Wang 2015	Intervention	NCT01235832	Table 5	Lower-Fat	NA	PP	Summary	Outcome	Glycemia	HOMA	HOMA-IR	HOMA	Blood	5	weeks	5	43	Mean	score	NA	NA	NA	NA	NA	SD	score	NA	NA	NA	NA	NA	NA	NA	NA	NA
8	Wang 2015	Intervention	NCT01235832	Table 5	Lower-Fat	NA	PP	Summary	Outcome	Lipids	IDL-C	IDL-C	Cholesterol, IDL-C	Blood	5	weeks	5	43	Mean	mg/dL	NA	NA	NA	NA	NA	SD	mg/dL	NA	NA	NA	NA	NA	NA	NA	NA	NA
8	Wang 2015	Intervention	NCT01235832	Table 5	Lower-Fat	NA	PP	Summary	Outcome	Glycemia	Insulin	Insulin	Insulin	Blood	5	weeks	5	43	Mean	uIU/mL	NA	NA	NA	NA	NA	SD	pmol/L	NA	NA	NA	NA	NA	NA	NA	NA	NA
8	Wang 2015	Intervention	NCT01235832	Table 5	Lower-Fat	NA	PP	Summary	Outcome	Lipids	LDL-C	LDL-C	Cholesterol, LDL-C	Blood	5	weeks	5	43	Mean	mg/dL	120.5	4.2	27.54	92.96	148.04	SD	mg/dL	120.5	120	120	120	4.2	27.5412	92.9588	148.041	NA
8	Wang 2015	Intervention	NCT01235832	Table 5	Lower-Fat	NA	PP	Summary	Outcome	Lipids	Non HDL-C	Non HDL-C	Cholesterol, Non-HDL-C	Blood	5	weeks	5	43	Mean	mg/dL	NA	NA	NA	NA	NA	SD	mg/dL	NA	NA	NA	NA	NA	NA	NA	NA	NA
8	Wang 2015	Intervention	NCT01235832	Table 5	Lower-Fat	NA	PP	Summary	Outcome	Lipids	Total cholesterol	Total cholesterol	Cholesterol, total	Blood	5	weeks	5	43	Mean	mg/dL	190.7	5.1	33.44	157.26	224.14	SD	mg/dL	190.7	190	190	190	5.1	33.4429	157.257	224.143	NA
8	Wang 2015	Intervention	NCT01235832	Table 5	Lower-Fat	NA	PP	Summary	Outcome	Lipids	Triglycerides	Triglycerides	Triglycerides	Blood	5	weeks	5	43	Mean	mg/dL	134.3	9.8	64.26	70.04	198.56	SD	mg/dL	134.3	134	130	130	9.8	64.2629	70.0371	198.563	NA
8	Wang 2015	Intervention	NCT01235832	Table 5	Lower-Fat	NA	PP	Summary	Outcome	Lipids	VLDL-C	VLDL-C	Cholesterol, VLDL-C	Blood	5	weeks	5	43	Mean	mg/dL	NA	NA	NA	NA	NA	SD	mg/dL	NA	NA	NA	NA	NA	NA	NA	NA	NA
8	Wang 2015	Intervention	NCT01235832	Table 5	Moderate-Fat	NA	PP	Summary	Outcome	Lipids	Apolipoprotein	ApoA1	Apolipoproteins, ApoA1	Blood	5	weeks	5	42	Mean	mg/L	NA	NA	NA	NA	NA	SD	mg/L	NA	NA	NA	NA	NA	NA	NA	NA	NA
8	Wang 2015	Intervention	NCT01235832	Table 5	Moderate-Fat	NA	PP	Summary	Outcome	Lipids	Apolipoprotein	ApoB	Apolipoproteins, ApoB	Blood	5	weeks	5	42	Mean	mg/L	NA	NA	NA	NA	NA	SD	mg/L	NA	NA	NA	NA	NA	NA	NA	NA	NA
8	Wang 2015	Intervention	NCT01235832	Table 5	Moderate-Fat	NA	PP	Summary	Outcome	Lipids	Apolipoprotein	ApoB:ApoA1	Apolipoproteins, ApoB:ApoA1	Blood	5	weeks	5	42	Mean	mg/L	NA	NA	NA	NA	NA	SD	mg/L	NA	NA	NA	NA	NA	NA	NA	NA	NA
8	Wang 2015	Intervention	NCT01235832	Table 5	Moderate-Fat	NA	PP	Summary	Outcome	Lipids	Apolipoprotein	Apolipoprotein A	Cholesterol, LP(a)	Blood	5	weeks	5	42	Mean	mg/dL	NA	NA	NA	NA	NA	SD	mg/dL	NA	NA	NA	NA	NA	NA	NA	NA	NA
8	Wang 2015	Intervention	NCT01235832	Table 5	Moderate-Fat	NA	PP	Summary	Outcome	CVD risk factors	Blood pressure	Diastolic blood pressure	Blood pressure, DBP	NA	5	weeks	5	42	Mean	mmHg	NA	NA	NA	NA	NA	SD	mmHg	NA	NA	NA	NA	NA	NA	NA	NA	NA
8	Wang 2015	Intervention	NCT01235832	Table 5	Moderate-Fat	NA	PP	Summary	Outcome	CVD risk factors	Blood pressure	Systolic blood pressure	Blood pressure, SBP	NA	5	weeks	5	42	Mean	mmHg	NA	NA	NA	NA	NA	SD	mmHg	NA	NA	NA	NA	NA	NA	NA	NA	NA
8	Wang 2015	Intervention	NCT01235832	Table 5	Moderate-Fat	NA	PP	Summary	Outcome	Lipids	Cholesterol ratios	LDL-C:HDL-C	Lipoprotein ratios, LDL:HDL-C	Blood	5	weeks	5	42	Mean	ratio	NA	NA	NA	NA	NA	SD	ratio	NA	NA	NA	NA	NA	NA	NA	NA	NA
8	Wang 2015	Intervention	NCT01235832	Table 5	Moderate-Fat	NA	PP	Summary	Outcome	Lipids	Cholesterol ratios	TG:HDL-C	Lipoprotein ratios, TG:HDL-C	Blood	5	weeks	5	42	Mean	ratio	NA	NA	NA	NA	NA	SD	ratio	NA	NA	NA	NA	NA	NA	NA	NA	NA
8	Wang 2015	Intervention	NCT01235832	Table 5	Moderate-Fat	NA	PP	Summary	Outcome	Lipids	Cholesterol ratios	Total cholesterol:HDL-C	Lipoprotein ratios, TC:HDL-C	Blood	5	weeks	5	42	Mean	ratio	NA	NA	NA	NA	NA	SD	ratio	NA	NA	NA	NA	NA	NA	NA	NA	NA
8	Wang 2015	Intervention	NCT01235832	Table 5	Moderate-Fat	NA	PP	Summary	Outcome	Immune	CRP	hsCRP	hsCRP	Blood	5	weeks	5	42	Mean	mg/L	NA	NA	NA	NA	NA	SD	mg/L	NA	NA	NA	NA	NA	NA	NA	NA	NA
8	Wang 2015	Intervention	NCT01235832	Table 5	Moderate-Fat	NA	PP	Summary	Outcome	Glycemia	Glucose	Glucose	Glucose	Blood	5	weeks	5	42	Mean	mg/dL	NA	NA	NA	NA	NA	SD	mg/dL	NA	NA	NA	NA	NA	NA	NA	NA	NA
8	Wang 2015	Intervention	NCT01235832	Table 5	Moderate-Fat	NA	PP	Summary	Outcome	Lipids	HDL-C	HDL-C	Cholesterol, HDL-C	Blood	5	weeks	5	42	Mean	mg/dL	47.2	1.5	9.72	37.48	56.92	SD	mg/dL	47.2	47	45	40	1.5	9.72111	37.4789	56.9211	NA
8	Wang 2015	Intervention	NCT01235832	Table 5	Moderate-Fat	NA	PP	Summary	Outcome	Glycemia	HOMA	HOMA-IR	HOMA	Blood	5	weeks	5	42	Mean	score	NA	NA	NA	NA	NA	SD	score	NA	NA	NA	NA	NA	NA	NA	NA	NA
8	Wang 2015	Intervention	NCT01235832	Table 5	Moderate-Fat	NA	PP	Summary	Outcome	Lipids	IDL-C	IDL-C	Cholesterol, IDL-C	Blood	5	weeks	5	42	Mean	mg/dL	NA	NA	NA	NA	NA	SD	mg/dL	NA	NA	NA	NA	NA	NA	NA	NA	NA
8	Wang 2015	Intervention	NCT01235832	Table 5	Moderate-Fat	NA	PP	Summary	Outcome	Glycemia	Insulin	Insulin	Insulin	Blood	5	weeks	5	42	Mean	uIU/mL	NA	NA	NA	NA	NA	SD	pmol/L	NA	NA	NA	NA	NA	NA	NA	NA	NA
8	Wang 2015	Intervention	NCT01235832	Table 5	Moderate-Fat	NA	PP	Summary	Outcome	Lipids	LDL-C	LDL-C	Cholesterol, LDL-C	Blood	5	weeks	5	42	Mean	mg/dL	119	3.7	23.98	95.02	142.98	SD	mg/dL	119	119	115	110	3.7	23.9787	95.0213	142.979	NA
8	Wang 2015	Intervention	NCT01235832	Table 5	Moderate-Fat	NA	PP	Summary	Outcome	Lipids	Non HDL-C	Non HDL-C	Cholesterol, Non-HDL-C	Blood	5	weeks	5	42	Mean	mg/dL	NA	NA	NA	NA	NA	SD	mg/dL	NA	NA	NA	NA	NA	NA	NA	NA	NA
8	Wang 2015	Intervention	NCT01235832	Table 5	Moderate-Fat	NA	PP	Summary	Outcome	Lipids	Total cholesterol	Total cholesterol	Cholesterol, total	Blood	5	weeks	5	42	Mean	mg/dL	188.7	4.4	28.52	160.18	217.22	SD	mg/dL	188.7	188	185	180	4.4	28.5153	160.185	217.215	NA
8	Wang 2015	Intervention	NCT01235832	Table 5	Moderate-Fat	NA	PP	Summary	Outcome	Lipids	Triglycerides	Triglycerides	Triglycerides	Blood	5	weeks	5	42	Mean	mg/dL	111.1	5.8	37.59	73.51	148.69	SD	mg/dL	111.1	111	110	110	5.8	37.5883	73.5117	148.688	NA
8	Wang 2015	Intervention	NCT01235832	Table 5	Moderate-Fat	NA	PP	Summary	Outcome	Lipids	VLDL-C	VLDL-C	Cholesterol, VLDL-C	Blood	5	weeks	5	42	Mean	mg/dL	NA	NA	NA	NA	NA	SD	mg/dL	NA	NA	NA	NA	NA	NA	NA	NA	NA
8	Wang 2015	Intervention	NCT01235832	Table 6	Avocado diet	NA	PP	Summary	Outcome	Lipids	Particle concentration	HDL particle concentration, Large	HDL-P Large	Blood	5	weeks	5	43	Mean	nmol/L	NA	NA	NA	NA	NA	SD	nmol/L	NA	NA	NA	NA	NA	NA	NA	NA	NA
8	Wang 2015	Intervention	NCT01235832	Table 6	Avocado diet	NA	PP	Summary	Outcome	Lipids	Particle concentration	HDL particle concentration, medium	HDL-P Medium	Blood	5	weeks	5	43	Mean	nmol/L	NA	NA	NA	NA	NA	SD	nmol/L	NA	NA	NA	NA	NA	NA	NA	NA	NA
8	Wang 2015	Intervention	NCT01235832	Table 6	Avocado diet	NA	PP	Summary	Outcome	Lipids	Particle concentration	HDL particle concentration, Small	HDL-P Small	Blood	5	weeks	5	43	Mean	nmol/L	NA	NA	NA	NA	NA	SD	nmol/L	NA	NA	NA	NA	NA	NA	NA	NA	NA
8	Wang 2015	Intervention	NCT01235832	Table 6	Avocado diet	NA	PP	Summary	Outcome	Lipids	Particle concentration	HDL particle concentration, Total	HDL-P Total	Blood	5	weeks	5	43	Mean	nmol/L	NA	NA	NA	NA	NA	SD	nmol/L	NA	NA	NA	NA	NA	NA	NA	NA	NA
8	Wang 2015	Intervention	NCT01235832	Table 6	Avocado diet	NA	PP	Summary	Outcome	Lipids	Particle concentration	IDL particle concentration	IDL-P	Blood	5	weeks	5	43	Mean	nmol/L	NA	NA	NA	NA	NA	SD	nmol/L	NA	NA	NA	NA	NA	NA	NA	NA	NA
8	Wang 2015	Intervention	NCT01235832	Table 6	Avocado diet	NA	PP	Summary	Outcome	Lipids	Particle concentration	LDL particle concentration, Large	LDL-P Large	Blood	5	weeks	5	43	Mean	nmol/L	NA	NA	NA	NA	NA	SD	nmol/L	NA	NA	NA	NA	NA	NA	NA	NA	NA
8	Wang 2015	Intervention	NCT01235832	Table 6	Avocado diet	NA	PP	Summary	Outcome	Lipids	Particle concentration	LDL particle concentration, Small	LDL-P Small	Blood	5	weeks	5	43	Mean	nmol/L	NA	NA	NA	NA	NA	SD	nmol/L	NA	NA	NA	NA	NA	NA	NA	NA	NA
8	Wang 2015	Intervention	NCT01235832	Table 6	Avocado diet	NA	PP	Summary	Outcome	Lipids	Particle concentration	LDL particle concentration, Total	LDL-P Total	Blood	5	weeks	5	43	Mean	nmol/L	NA	NA	NA	NA	NA	SD	nmol/L	NA	NA	NA	NA	NA	NA	NA	NA	NA
8	Wang 2015	Intervention	NCT01235832	Table 6	Avocado diet	NA	PP	Summary	Outcome	Lipids	Particle concentration	VLDL particle concentration, Large	VLDL-P Large	Blood	5	weeks	5	43	Mean	nmol/L	NA	NA	NA	NA	NA	SD	nmol/L	NA	NA	NA	NA	NA	NA	NA	NA	NA
8	Wang 2015	Intervention	NCT01235832	Table 6	Avocado diet	NA	PP	Summary	Outcome	Lipids	Particle concentration	VLDL particle concentration, Medium	VLDL-P Medium	Blood	5	weeks	5	43	Mean	nmol/L	NA	NA	NA	NA	NA	SD	nmol/L	NA	NA	NA	NA	NA	NA	NA	NA	NA
8	Wang 2015	Intervention	NCT01235832	Table 6	Avocado diet	NA	PP	Summary	Outcome	Lipids	Particle concentration	VLDL particle concentration, Small	VLDL-P Small	Blood	5	weeks	5	43	Mean	nmol/L	NA	NA	NA	NA	NA	SD	nmol/L	NA	NA	NA	NA	NA	NA	NA	NA	NA
8	Wang 2015	Intervention	NCT01235832	Table 6	Avocado diet	NA	PP	Summary	Outcome	Lipids	Particle concentration	VLDL particle concentration, Total	VLDL-P Total	Blood	5	weeks	5	43	Mean	nmol/L	NA	NA	NA	NA	NA	SD	nmol/L	NA	NA	NA	NA	NA	NA	NA	NA	NA
8	Wang 2015	Intervention	NCT01235832	Table 6	Avocado diet	NA	PP	Summary	Outcome	Lipids	Particle size	Average particle size HDL	Average particle size, HDL	Blood	5	weeks	5	43	Mean	nm	NA	NA	NA	NA	NA	SD	nm	NA	NA	NA	NA	NA	NA	NA	NA	NA
8	Wang 2015	Intervention	NCT01235832	Table 6	Avocado diet	NA	PP	Summary	Outcome	Lipids	Particle size	Average particle size LDL	Average particle size, LDL	Blood	5	weeks	5	43	Mean	nm	NA	NA	NA	NA	NA	SD	nm	NA	NA	NA	NA	NA	NA	NA	NA	NA
8	Wang 2015	Intervention	NCT01235832	Table 6	Avocado diet	NA	PP	Summary	Outcome	Lipids	Particle size	Average particle size VLDL	Average particle size, VLDL	Blood	5	weeks	5	43	Mean	nm	NA	NA	NA	NA	NA	SD	nm	NA	NA	NA	NA	NA	NA	NA	NA	NA
8	Wang 2015	Intervention	NCT01235832	Table 6	Baseline Average American Diet	NA	ITT	Summary	Outcome	Lipids	Apolipoprotein	ApoA1	Apolipoproteins, ApoA1	Blood	2	weeks	2	45	Mean	mg/L	NA	NA	NA	NA	NA	SD	mg/L	NA	NA	NA	NA	NA	NA	NA	NA	NA
8	Wang 2015	Intervention	NCT01235832	Table 6	Baseline Average American Diet	NA	ITT	Summary	Outcome	Lipids	Apolipoprotein	ApoB	Apolipoproteins, ApoB	Blood	2	weeks	2	45	Mean	mg/L	NA	NA	NA	NA	NA	SD	mg/L	NA	NA	NA	NA	NA	NA	NA	NA	NA
8	Wang 2015	Intervention	NCT01235832	Table 6	Baseline Average American Diet	NA	ITT	Summary	Outcome	Lipids	Apolipoprotein	ApoB:ApoA1	Apolipoproteins, ApoB:ApoA1	Blood	2	weeks	2	45	Mean	mg/L	NA	NA	NA	NA	NA	SD	mg/L	NA	NA	NA	NA	NA	NA	NA	NA	NA
8	Wang 2015	Intervention	NCT01235832	Table 6	Baseline Average American Diet	NA	ITT	Summary	Outcome	Lipids	Apolipoprotein	Apolipoprotein A	Cholesterol, LP(a)	Blood	2	weeks	2	45	Mean	mg/dL	NA	NA	NA	NA	NA	SD	mg/dL	NA	NA	NA	NA	NA	NA	NA	NA	NA
8	Wang 2015	Intervention	NCT01235832	Table 6	Baseline Average American Diet	NA	ITT	Summary	Outcome	CVD risk factors	Blood pressure	Diastolic blood pressure	Blood pressure, DBP	NA	2	weeks	2	45	Mean	mmHg	NA	NA	NA	NA	NA	SD	mmHg	NA	NA	NA	NA	NA	NA	NA	NA	NA
8	Wang 2015	Intervention	NCT01235832	Table 6	Baseline Average American Diet	NA	ITT	Summary	Outcome	CVD risk factors	Blood pressure	Systolic blood pressure	Blood pressure, SBP	NA	2	weeks	2	45	Mean	mmHg	NA	NA	NA	NA	NA	SD	mmHg	NA	NA	NA	NA	NA	NA	NA	NA	NA
8	Wang 2015	Intervention	NCT01235832	Table 6	Baseline Average American Diet	NA	ITT	Summary	Outcome	Glycemia	Glucose	Glucose	Glucose	Blood	2	weeks	2	45	Mean	mg/dL	NA	NA	NA	NA	NA	SD	mg/dL	NA	NA	NA	NA	NA	NA	NA	NA	NA
8	Wang 2015	Intervention	NCT01235832	Table 6	Baseline Average American Diet	NA	ITT	Summary	Outcome	Lipids	HDL-C	HDL-C	Cholesterol, HDL-C	Blood	2	weeks	2	45	Mean	mg/dL	48.7	1.8	12.07	36.63	60.77	SD	mg/dL	48.7	48	45	40	1.8	12.0748	36.6252	60.7748	NA
8	Wang 2015	Intervention	NCT01235832	Table 6	Baseline Average American Diet	NA	ITT	Summary	Outcome	Lipids	IDL-C	IDL-C	Cholesterol, IDL-C	Blood	2	weeks	2	45	Mean	mg/dL	NA	NA	NA	NA	NA	SD	mg/dL	NA	NA	NA	NA	NA	NA	NA	NA	NA
8	Wang 2015	Intervention	NCT01235832	Table 6	Baseline Average American Diet	NA	ITT	Summary	Outcome	Lipids	LDL-C	LDL-C	Cholesterol, LDL-C	Blood	2	weeks	2	45	Mean	mg/dL	128.1	3.9	26.16	101.94	154.26	SD	mg/dL	128.1	128	125	120	3.9	26.162	101.938	154.262	NA
8	Wang 2015	Intervention	NCT01235832	Table 6	Baseline Average American Diet	NA	ITT	Summary	Outcome	Lipids	Non HDL-C	Non HDL-C	Cholesterol, Non-HDL-C	Blood	2	weeks	2	45	Mean	mg/dL	NA	NA	NA	NA	NA	SD	mg/dL	NA	NA	NA	NA	NA	NA	NA	NA	NA
8	Wang 2015	Intervention	NCT01235832	Table 6	Baseline Average American Diet	NA	ITT	Summary	Outcome	Lipids	Particle concentration	IDL particle concentration	IDL-P	Blood	2	weeks	2	45	Mean	nmol/L	NA	NA	NA	NA	NA	SD	nmol/L	NA	NA	NA	NA	NA	NA	NA	NA	NA
8	Wang 2015	Intervention	NCT01235832	Table 6	Baseline Average American Diet	NA	ITT	Summary	Outcome	Lipids	Particle concentration	LDL particle concentration, Large	LDL-P Large	Blood	2	weeks	2	45	Mean	nmol/L	NA	NA	NA	NA	NA	SD	nmol/L	NA	NA	NA	NA	NA	NA	NA	NA	NA
8	Wang 2015	Intervention	NCT01235832	Table 6	Baseline Average American Diet	NA	ITT	Summary	Outcome	Lipids	Particle concentration	LDL particle concentration, Small	LDL-P Small	Blood	2	weeks	2	45	Mean	nmol/L	NA	NA	NA	NA	NA	SD	nmol/L	NA	NA	NA	NA	NA	NA	NA	NA	NA
8	Wang 2015	Intervention	NCT01235832	Table 6	Baseline Average American Diet	NA	ITT	Summary	Outcome	Lipids	Particle concentration	LDL particle concentration, Total	LDL-P Total	Blood	2	weeks	2	45	Mean	nmol/L	NA	NA	NA	NA	NA	SD	nmol/L	NA	NA	NA	NA	NA	NA	NA	NA	NA
8	Wang 2015	Intervention	NCT01235832	Table 6	Baseline Average American Diet	NA	ITT	Summary	Outcome	Lipids	Particle concentration	VLDL particle concentration, Large	VLDL-P Large	Blood	2	weeks	2	45	Mean	nmol/L	NA	NA	NA	NA	NA	SD	nmol/L	NA	NA	NA	NA	NA	NA	NA	NA	NA
8	Wang 2015	Intervention	NCT01235832	Table 6	Baseline Average American Diet	NA	ITT	Summary	Outcome	Lipids	Particle concentration	VLDL particle concentration, Medium	VLDL-P Medium	Blood	2	weeks	2	45	Mean	nmol/L	NA	NA	NA	NA	NA	SD	nmol/L	NA	NA	NA	NA	NA	NA	NA	NA	NA
8	Wang 2015	Intervention	NCT01235832	Table 6	Baseline Average American Diet	NA	ITT	Summary	Outcome	Lipids	Particle concentration	VLDL particle concentration, Small	VLDL-P Small	Blood	2	weeks	2	45	Mean	nmol/L	NA	NA	NA	NA	NA	SD	nmol/L	NA	NA	NA	NA	NA	NA	NA	NA	NA
8	Wang 2015	Intervention	NCT01235832	Table 6	Baseline Average American Diet	NA	ITT	Summary	Outcome	Lipids	Particle concentration	VLDL particle concentration, Total	VLDL-P Total	Blood	2	weeks	2	45	Mean	nmol/L	NA	NA	NA	NA	NA	SD	nmol/L	NA	NA	NA	NA	NA	NA	NA	NA	NA
8	Wang 2015	Intervention	NCT01235832	Table 6	Baseline Average American Diet	NA	ITT	Summary	Outcome	Lipids	Particle size	Average particle size HDL	Average particle size, HDL	Blood	2	weeks	2	45	Mean	nm	NA	NA	NA	NA	NA	SD	nm	NA	NA	NA	NA	NA	NA	NA	NA	NA
8	Wang 2015	Intervention	NCT01235832	Table 6	Baseline Average American Diet	NA	ITT	Summary	Outcome	Lipids	Particle size	Average particle size LDL	Average particle size, LDL	Blood	2	weeks	2	45	Mean	nm	NA	NA	NA	NA	NA	SD	nm	NA	NA	NA	NA	NA	NA	NA	NA	NA
8	Wang 2015	Intervention	NCT01235832	Table 6	Baseline Average American Diet	NA	ITT	Summary	Outcome	Lipids	Particle size	Average particle size VLDL	Average particle size, VLDL	Blood	2	weeks	2	45	Mean	nm	NA	NA	NA	NA	NA	SD	nm	NA	NA	NA	NA	NA	NA	NA	NA	NA
8	Wang 2015	Intervention	NCT01235832	Table 6	Baseline Average American Diet	NA	ITT	Summary	Outcome	Lipids	Total cholesterol	Total cholesterol	Cholesterol, total	Blood	2	weeks	2	45	Mean	mg/dL	199.9	4.8	32.2	167.7	232.1	SD	mg/dL	199.9	199	195	190	4.8	32.1994	167.701	232.099	NA
8	Wang 2015	Intervention	NCT01235832	Table 6	Baseline Average American Diet	NA	ITT	Summary	Outcome	Lipids	VLDL-C	VLDL-C	Cholesterol, VLDL-C	Blood	2	weeks	2	45	Mean	mg/dL	NA	NA	NA	NA	NA	SD	mg/dL	NA	NA	NA	NA	NA	NA	NA	NA	NA
8	Wang 2015	Intervention	NCT01235832	Table 6	Lower-Fat	NA	PP	Summary	Outcome	Lipids	Particle concentration	HDL particle concentration, Large	HDL-P Large	Blood	5	weeks	5	43	Mean	nmol/L	NA	NA	NA	NA	NA	SD	nmol/L	NA	NA	NA	NA	NA	NA	NA	NA	NA
8	Wang 2015	Intervention	NCT01235832	Table 6	Lower-Fat	NA	PP	Summary	Outcome	Lipids	Particle concentration	HDL particle concentration, medium	HDL-P Medium	Blood	5	weeks	5	43	Mean	nmol/L	NA	NA	NA	NA	NA	SD	nmol/L	NA	NA	NA	NA	NA	NA	NA	NA	NA
8	Wang 2015	Intervention	NCT01235832	Table 6	Lower-Fat	NA	PP	Summary	Outcome	Lipids	Particle concentration	HDL particle concentration, Small	HDL-P Small	Blood	5	weeks	5	43	Mean	nmol/L	NA	NA	NA	NA	NA	SD	nmol/L	NA	NA	NA	NA	NA	NA	NA	NA	NA
8	Wang 2015	Intervention	NCT01235832	Table 6	Lower-Fat	NA	PP	Summary	Outcome	Lipids	Particle concentration	HDL particle concentration, Total	HDL-P Total	Blood	5	weeks	5	43	Mean	nmol/L	NA	NA	NA	NA	NA	SD	nmol/L	NA	NA	NA	NA	NA	NA	NA	NA	NA
8	Wang 2015	Intervention	NCT01235832	Table 6	Lower-Fat	NA	PP	Summary	Outcome	Lipids	Particle concentration	IDL particle concentration	IDL-P	Blood	5	weeks	5	43	Mean	nmol/L	NA	NA	NA	NA	NA	SD	nmol/L	NA	NA	NA	NA	NA	NA	NA	NA	NA
8	Wang 2015	Intervention	NCT01235832	Table 6	Lower-Fat	NA	PP	Summary	Outcome	Lipids	Particle concentration	LDL particle concentration, Large	LDL-P Large	Blood	5	weeks	5	43	Mean	nmol/L	NA	NA	NA	NA	NA	SD	nmol/L	NA	NA	NA	NA	NA	NA	NA	NA	NA
8	Wang 2015	Intervention	NCT01235832	Table 6	Lower-Fat	NA	PP	Summary	Outcome	Lipids	Particle concentration	LDL particle concentration, Small	LDL-P Small	Blood	5	weeks	5	43	Mean	nmol/L	NA	NA	NA	NA	NA	SD	nmol/L	NA	NA	NA	NA	NA	NA	NA	NA	NA
8	Wang 2015	Intervention	NCT01235832	Table 6	Lower-Fat	NA	PP	Summary	Outcome	Lipids	Particle concentration	LDL particle concentration, Total	LDL-P Total	Blood	5	weeks	5	43	Mean	nmol/L	NA	NA	NA	NA	NA	SD	nmol/L	NA	NA	NA	NA	NA	NA	NA	NA	NA
8	Wang 2015	Intervention	NCT01235832	Table 6	Lower-Fat	NA	PP	Summary	Outcome	Lipids	Particle concentration	VLDL particle concentration, Large	VLDL-P Large	Blood	5	weeks	5	43	Mean	nmol/L	NA	NA	NA	NA	NA	SD	nmol/L	NA	NA	NA	NA	NA	NA	NA	NA	NA
8	Wang 2015	Intervention	NCT01235832	Table 6	Lower-Fat	NA	PP	Summary	Outcome	Lipids	Particle concentration	VLDL particle concentration, Medium	VLDL-P Medium	Blood	5	weeks	5	43	Mean	nmol/L	NA	NA	NA	NA	NA	SD	nmol/L	NA	NA	NA	NA	NA	NA	NA	NA	NA
8	Wang 2015	Intervention	NCT01235832	Table 6	Lower-Fat	NA	PP	Summary	Outcome	Lipids	Particle concentration	VLDL particle concentration, Small	VLDL-P Small	Blood	5	weeks	5	43	Mean	nmol/L	NA	NA	NA	NA	NA	SD	nmol/L	NA	NA	NA	NA	NA	NA	NA	NA	NA
8	Wang 2015	Intervention	NCT01235832	Table 6	Lower-Fat	NA	PP	Summary	Outcome	Lipids	Particle concentration	VLDL particle concentration, Total	VLDL-P Total	Blood	5	weeks	5	43	Mean	nmol/L	NA	NA	NA	NA	NA	SD	nmol/L	NA	NA	NA	NA	NA	NA	NA	NA	NA
8	Wang 2015	Intervention	NCT01235832	Table 6	Lower-Fat	NA	PP	Summary	Outcome	Lipids	Particle size	Average particle size HDL	Average particle size, HDL	Blood	5	weeks	5	43	Mean	nm	NA	NA	NA	NA	NA	SD	nm	NA	NA	NA	NA	NA	NA	NA	NA	NA
8	Wang 2015	Intervention	NCT01235832	Table 6	Lower-Fat	NA	PP	Summary	Outcome	Lipids	Particle size	Average particle size LDL	Average particle size, LDL	Blood	5	weeks	5	43	Mean	nm	NA	NA	NA	NA	NA	SD	nm	NA	NA	NA	NA	NA	NA	NA	NA	NA
8	Wang 2015	Intervention	NCT01235832	Table 6	Lower-Fat	NA	PP	Summary	Outcome	Lipids	Particle size	Average particle size VLDL	Average particle size, VLDL	Blood	5	weeks	5	43	Mean	nm	NA	NA	NA	NA	NA	SD	nm	NA	NA	NA	NA	NA	NA	NA	NA	NA
8	Wang 2015	Intervention	NCT01235832	Table 6	Moderate-Fat	NA	PP	Summary	Outcome	Lipids	Particle concentration	HDL particle concentration, Large	HDL-P Large	Blood	5	weeks	5	42	Mean	nmol/L	NA	NA	NA	NA	NA	SD	nmol/L	NA	NA	NA	NA	NA	NA	NA	NA	NA
8	Wang 2015	Intervention	NCT01235832	Table 6	Moderate-Fat	NA	PP	Summary	Outcome	Lipids	Particle concentration	HDL particle concentration, medium	HDL-P Medium	Blood	5	weeks	5	42	Mean	nmol/L	NA	NA	NA	NA	NA	SD	nmol/L	NA	NA	NA	NA	NA	NA	NA	NA	NA
8	Wang 2015	Intervention	NCT01235832	Table 6	Moderate-Fat	NA	PP	Summary	Outcome	Lipids	Particle concentration	HDL particle concentration, Small	HDL-P Small	Blood	5	weeks	5	42	Mean	nmol/L	NA	NA	NA	NA	NA	SD	nmol/L	NA	NA	NA	NA	NA	NA	NA	NA	NA
8	Wang 2015	Intervention	NCT01235832	Table 6	Moderate-Fat	NA	PP	Summary	Outcome	Lipids	Particle concentration	HDL particle concentration, Total	HDL-P Total	Blood	5	weeks	5	42	Mean	nmol/L	NA	NA	NA	NA	NA	SD	nmol/L	NA	NA	NA	NA	NA	NA	NA	NA	NA
8	Wang 2015	Intervention	NCT01235832	Table 6	Moderate-Fat	NA	PP	Summary	Outcome	Lipids	Particle concentration	IDL particle concentration	IDL-P	Blood	5	weeks	5	42	Mean	nmol/L	NA	NA	NA	NA	NA	SD	nmol/L	NA	NA	NA	NA	NA	NA	NA	NA	NA
8	Wang 2015	Intervention	NCT01235832	Table 6	Moderate-Fat	NA	PP	Summary	Outcome	Lipids	Particle concentration	LDL particle concentration, Large	LDL-P Large	Blood	5	weeks	5	42	Mean	nmol/L	NA	NA	NA	NA	NA	SD	nmol/L	NA	NA	NA	NA	NA	NA	NA	NA	NA
8	Wang 2015	Intervention	NCT01235832	Table 6	Moderate-Fat	NA	PP	Summary	Outcome	Lipids	Particle concentration	LDL particle concentration, Small	LDL-P Small	Blood	5	weeks	5	42	Mean	nmol/L	NA	NA	NA	NA	NA	SD	nmol/L	NA	NA	NA	NA	NA	NA	NA	NA	NA
8	Wang 2015	Intervention	NCT01235832	Table 6	Moderate-Fat	NA	PP	Summary	Outcome	Lipids	Particle concentration	LDL particle concentration, Total	LDL-P Total	Blood	5	weeks	5	42	Mean	nmol/L	NA	NA	NA	NA	NA	SD	nmol/L	NA	NA	NA	NA	NA	NA	NA	NA	NA
8	Wang 2015	Intervention	NCT01235832	Table 6	Moderate-Fat	NA	PP	Summary	Outcome	Lipids	Particle concentration	VLDL particle concentration, Large	VLDL-P Large	Blood	5	weeks	5	42	Mean	nmol/L	NA	NA	NA	NA	NA	SD	nmol/L	NA	NA	NA	NA	NA	NA	NA	NA	NA
8	Wang 2015	Intervention	NCT01235832	Table 6	Moderate-Fat	NA	PP	Summary	Outcome	Lipids	Particle concentration	VLDL particle concentration, Medium	VLDL-P Medium	Blood	5	weeks	5	42	Mean	nmol/L	NA	NA	NA	NA	NA	SD	nmol/L	NA	NA	NA	NA	NA	NA	NA	NA	NA
8	Wang 2015	Intervention	NCT01235832	Table 6	Moderate-Fat	NA	PP	Summary	Outcome	Lipids	Particle concentration	VLDL particle concentration, Small	VLDL-P Small	Blood	5	weeks	5	42	Mean	nmol/L	NA	NA	NA	NA	NA	SD	nmol/L	NA	NA	NA	NA	NA	NA	NA	NA	NA
8	Wang 2015	Intervention	NCT01235832	Table 6	Moderate-Fat	NA	PP	Summary	Outcome	Lipids	Particle concentration	VLDL particle concentration, Total	VLDL-P Total	Blood	5	weeks	5	42	Mean	nmol/L	NA	NA	NA	NA	NA	SD	nmol/L	NA	NA	NA	NA	NA	NA	NA	NA	NA
8	Wang 2015	Intervention	NCT01235832	Table 6	Moderate-Fat	NA	PP	Summary	Outcome	Lipids	Particle size	Average particle size HDL	Average particle size, HDL	Blood	5	weeks	5	42	Mean	nm	NA	NA	NA	NA	NA	SD	nm	NA	NA	NA	NA	NA	NA	NA	NA	NA
8	Wang 2015	Intervention	NCT01235832	Table 6	Moderate-Fat	NA	PP	Summary	Outcome	Lipids	Particle size	Average particle size LDL	Average particle size, LDL	Blood	5	weeks	5	42	Mean	nm	NA	NA	NA	NA	NA	SD	nm	NA	NA	NA	NA	NA	NA	NA	NA	NA
8	Wang 2015	Intervention	NCT01235832	Table 6	Moderate-Fat	NA	PP	Summary	Outcome	Lipids	Particle size	Average particle size VLDL	Average particle size, VLDL	Blood	5	weeks	5	42	Mean	nm	NA	NA	NA	NA	NA	SD	nm	NA	NA	NA	NA	NA	NA	NA	NA	NA
8	Wang 2015	Intervention	NCT01235832	Table 7	Avocado diet	NA	PP	Summary	Outcome	Lipids	HDL-C	HDL-C II	HDL-C, HDL2	Blood	5	weeks	5	43	Mean	mg/dL	10.8	0.6	3.93	6.87	14.73	SD	mg/dL	10.8	10	10	10	0.6	3.93446	6.86554	14.7345	NA
8	Wang 2015	Intervention	NCT01235832	Table 7	Avocado diet	NA	PP	Summary	Outcome	Lipids	HDL-C	HDL-C III	HDL-C, HDL3	Blood	5	weeks	5	43	Mean	mg/dL	36	1	6.56	29.44	42.56	SD	mg/dL	36	36	35	30	1	6.55744	29.4426	42.5574	NA
8	Wang 2015	Intervention	NCT01235832	Table 7	Avocado diet	NA	PP	Summary	Outcome	Lipids	IDL-C	IDL-C I	IDL-C, IDL1	Blood	5	weeks	5	43	Mean	mg/dL	NA	NA	NA	NA	NA	SD	mg/dL	NA	NA	NA	NA	NA	NA	NA	NA	NA
8	Wang 2015	Intervention	NCT01235832	Table 7	Avocado diet	NA	PP	Summary	Outcome	Lipids	IDL-C	IDL-C II	IDL-C, IDL2	Blood	5	weeks	5	43	Mean	mg/dL	NA	NA	NA	NA	NA	SD	mg/dL	NA	NA	NA	NA	NA	NA	NA	NA	NA
8	Wang 2015	Intervention	NCT01235832	Table 7	Avocado diet	NA	PP	Summary	Outcome	Lipids	LDL-C	LDL-C I	LDL-C, LDL1	Blood	5	weeks	5	43	Mean	mg/dL	17.9	1	6.56	11.34	24.46	SD	mg/dL	17.9	17	15	10	1	6.55744	11.3426	24.4574	NA
8	Wang 2015	Intervention	NCT01235832	Table 7	Avocado diet	NA	PP	Summary	Outcome	Lipids	LDL-C	LDL-C I+II	LDL-C, LDL1+2	Blood	5	weeks	5	43	Mean	mg/dL	43.2	2.9	19.02	24.18	62.22	SD	mg/dL	43.2	43	40	40	2.9	19.0166	24.1834	62.2166	NA
8	Wang 2015	Intervention	NCT01235832	Table 7	Avocado diet	NA	PP	Summary	Outcome	Lipids	LDL-C	LDL-C II	LDL-C, LDL2	Blood	5	weeks	5	43	Mean	mg/dL	25.4	2.2	14.43	10.97	39.83	SD	mg/dL	25.4	25	25	20	2.2	14.4264	10.9736	39.8264	NA
8	Wang 2015	Intervention	NCT01235832	Table 7	Avocado diet	NA	PP	Summary	Outcome	Lipids	LDL-C	LDL-C III	LDL-C, LDL3	Blood	5	weeks	5	43	Mean	mg/dL	40	2	13.11	26.89	53.11	SD	mg/dL	40	40	40	40	2	13.1149	26.8851	53.1149	NA
8	Wang 2015	Intervention	NCT01235832	Table 7	Avocado diet	NA	PP	Summary	Outcome	Lipids	LDL-C	LDL-C III+IV	LDL-C, LDL3+4	Blood	5	weeks	5	43	Mean	mg/dL	50.5	3.1	20.33	30.17	70.83	SD	mg/dL	50.5	50	50	50	3.1	20.3281	30.1719	70.8281	NA
8	Wang 2015	Intervention	NCT01235832	Table 7	Avocado diet	NA	PP	Summary	Outcome	Lipids	LDL-C	LDL-C IV	LDL-C, LDL4	Blood	5	weeks	5	43	Mean	mg/dL	10.5	1.3	8.52	1.98	19.02	SD	mg/dL	10.5	10	10	10	1.3	8.52467	1.97533	19.0247	NA
8	Wang 2015	Intervention	NCT01235832	Table 7	Avocado diet	NA	PP	Summary	Outcome	Lipids	Peak max time	LDL peak max time	LDL peak max time	Blood	5	weeks	5	43	Mean	sec	NA	NA	NA	NA	NA	SD	sec	NA	NA	NA	NA	NA	NA	NA	NA	NA
8	Wang 2015	Intervention	NCT01235832	Table 7	Avocado diet	NA	PP	Summary	Outcome	Lipids	VLDL-C	VLDL-C	Remnant Lp	Blood	5	weeks	5	43	Mean	mg/dL	NA	NA	NA	NA	NA	SD	mg/dL	NA	NA	NA	NA	NA	NA	NA	NA	NA
8	Wang 2015	Intervention	NCT01235832	Table 7	Avocado diet	NA	PP	Summary	Outcome	Lipids	VLDL-C	VLDL-C I+II	VLDL-C, VLDL1+2	Blood	5	weeks	5	43	Mean	mg/dL	NA	NA	NA	NA	NA	SD	mg/dL	NA	NA	NA	NA	NA	NA	NA	NA	NA
8	Wang 2015	Intervention	NCT01235832	Table 7	Avocado diet	NA	PP	Summary	Outcome	Lipids	VLDL-C	VLDL-C III	VLDL-C, VLDL3	Blood	5	weeks	5	43	Mean	mg/dL	NA	NA	NA	NA	NA	SD	mg/dL	NA	NA	NA	NA	NA	NA	NA	NA	NA
8	Wang 2015	Intervention	NCT01235832	Table 7	Baseline Average American Diet	NA	ITT	Summary	Outcome	Lipids	HDL-C	HDL-C II	HDL-C, HDL2	Blood	2	weeks	2	45	Mean	mg/dL	11.6	0.7	4.7	6.9	16.3	SD	mg/dL	11.6	11	10	10	0.7	4.69574	6.90426	16.2957	NA
8	Wang 2015	Intervention	NCT01235832	Table 7	Baseline Average American Diet	NA	ITT	Summary	Outcome	Lipids	HDL-C	HDL-C III	HDL-C, HDL3	Blood	2	weeks	2	45	Mean	mg/dL	36.9	1.1	7.38	29.52	44.28	SD	mg/dL	36.9	36	35	30	1.1	7.37902	29.521	44.279	NA
8	Wang 2015	Intervention	NCT01235832	Table 7	Baseline Average American Diet	NA	ITT	Summary	Outcome	Lipids	IDL-C	IDL-C I	IDL-C, IDL1	Blood	2	weeks	2	45	Mean	mg/dL	NA	NA	NA	NA	NA	SD	mg/dL	NA	NA	NA	NA	NA	NA	NA	NA	NA
8	Wang 2015	Intervention	NCT01235832	Table 7	Baseline Average American Diet	NA	ITT	Summary	Outcome	Lipids	IDL-C	IDL-C II	IDL-C, IDL2	Blood	2	weeks	2	45	Mean	mg/dL	NA	NA	NA	NA	NA	SD	mg/dL	NA	NA	NA	NA	NA	NA	NA	NA	NA
8	Wang 2015	Intervention	NCT01235832	Table 7	Baseline Average American Diet	NA	ITT	Summary	Outcome	Lipids	LDL-C	LDL-C I	LDL-C, LDL1	Blood	2	weeks	2	45	Mean	mg/dL	21.3	1.2	8.05	13.25	29.35	SD	mg/dL	21.3	21	20	20	1.2	8.04984	13.2502	29.3498	NA
8	Wang 2015	Intervention	NCT01235832	Table 7	Baseline Average American Diet	NA	ITT	Summary	Outcome	Lipids	LDL-C	LDL-C I+II	LDL-C, LDL1+2	Blood	2	weeks	2	45	Mean	mg/dL	51	2.8	18.78	32.22	69.78	SD	mg/dL	51	51	50	50	2.8	18.783	32.217	69.783	NA
8	Wang 2015	Intervention	NCT01235832	Table 7	Baseline Average American Diet	NA	ITT	Summary	Outcome	Lipids	LDL-C	LDL-C II	LDL-C, LDL2	Blood	2	weeks	2	45	Mean	mg/dL	29.7	2	13.42	16.28	43.12	SD	mg/dL	29.7	29	25	20	2	13.4164	16.2836	43.1164	NA
8	Wang 2015	Intervention	NCT01235832	Table 7	Baseline Average American Diet	NA	ITT	Summary	Outcome	Lipids	LDL-C	LDL-C III	LDL-C, LDL3	Blood	2	weeks	2	45	Mean	mg/dL	44.5	2.4	16.1	28.4	60.6	SD	mg/dL	44.5	44	40	40	2.4	16.0997	28.4003	60.5997	NA
8	Wang 2015	Intervention	NCT01235832	Table 7	Baseline Average American Diet	NA	ITT	Summary	Outcome	Lipids	LDL-C	LDL-C III+IV	LDL-C, LDL3+4	Blood	2	weeks	2	45	Mean	mg/dL	55	3.3	22.14	32.86	77.14	SD	mg/dL	55	55	55	50	3.3	22.1371	32.8629	77.1371	NA
8	Wang 2015	Intervention	NCT01235832	Table 7	Baseline Average American Diet	NA	ITT	Summary	Outcome	Lipids	LDL-C	LDL-C IV	LDL-C, LDL4	Blood	2	weeks	2	45	Mean	mg/dL	10.4	1.3	8.72	1.68	19.12	SD	mg/dL	10.4	10	10	10	1.3	8.72067	1.67933	19.1207	NA
8	Wang 2015	Intervention	NCT01235832	Table 7	Baseline Average American Diet	NA	ITT	Summary	Outcome	Lipids	Particle concentration	HDL particle concentration, Large	HDL-P Large	Blood	2	weeks	2	45	Mean	nmol/L	NA	NA	NA	NA	NA	SD	nmol/L	NA	NA	NA	NA	NA	NA	NA	NA	NA
8	Wang 2015	Intervention	NCT01235832	Table 7	Baseline Average American Diet	NA	ITT	Summary	Outcome	Lipids	Particle concentration	HDL particle concentration, medium	HDL-P Medium	Blood	2	weeks	2	45	Mean	nmol/L	NA	NA	NA	NA	NA	SD	nmol/L	NA	NA	NA	NA	NA	NA	NA	NA	NA
8	Wang 2015	Intervention	NCT01235832	Table 7	Baseline Average American Diet	NA	ITT	Summary	Outcome	Lipids	Particle concentration	HDL particle concentration, Small	HDL-P Small	Blood	2	weeks	2	45	Mean	nmol/L	NA	NA	NA	NA	NA	SD	nmol/L	NA	NA	NA	NA	NA	NA	NA	NA	NA
8	Wang 2015	Intervention	NCT01235832	Table 7	Baseline Average American Diet	NA	ITT	Summary	Outcome	Lipids	Particle concentration	HDL particle concentration, Total	HDL-P Total	Blood	2	weeks	2	45	Mean	nmol/L	NA	NA	NA	NA	NA	SD	nmol/L	NA	NA	NA	NA	NA	NA	NA	NA	NA
8	Wang 2015	Intervention	NCT01235832	Table 7	Baseline Average American Diet	NA	ITT	Summary	Outcome	Lipids	Peak max time	LDL peak max time	LDL peak max time	Blood	2	weeks	2	45	Mean	sec	NA	NA	NA	NA	NA	SD	sec	NA	NA	NA	NA	NA	NA	NA	NA	NA
8	Wang 2015	Intervention	NCT01235832	Table 7	Baseline Average American Diet	NA	ITT	Summary	Outcome	Lipids	VLDL-C	VLDL-C	Remnant Lp	Blood	2	weeks	2	45	Mean	mg/dL	NA	NA	NA	NA	NA	SD	mg/dL	NA	NA	NA	NA	NA	NA	NA	NA	NA
8	Wang 2015	Intervention	NCT01235832	Table 7	Baseline Average American Diet	NA	ITT	Summary	Outcome	Lipids	VLDL-C	VLDL-C I+II	VLDL-C, VLDL1+2	Blood	2	weeks	2	45	Mean	mg/dL	NA	NA	NA	NA	NA	SD	mg/dL	NA	NA	NA	NA	NA	NA	NA	NA	NA
8	Wang 2015	Intervention	NCT01235832	Table 7	Baseline Average American Diet	NA	ITT	Summary	Outcome	Lipids	VLDL-C	VLDL-C III	VLDL-C, VLDL3	Blood	2	weeks	2	45	Mean	mg/dL	NA	NA	NA	NA	NA	SD	mg/dL	NA	NA	NA	NA	NA	NA	NA	NA	NA
8	Wang 2015	Intervention	NCT01235832	Table 7	Lower-Fat	NA	PP	Summary	Outcome	Lipids	HDL-C	HDL-C II	HDL-C, HDL2	Blood	5	weeks	5	43	Mean	mg/dL	10.5	0.6	3.93	6.57	14.43	SD	mg/dL	10.5	10	10	10	0.6	3.93446	6.56554	14.4345	NA
8	Wang 2015	Intervention	NCT01235832	Table 7	Lower-Fat	NA	PP	Summary	Outcome	Lipids	HDL-C	HDL-C III	HDL-C, HDL3	Blood	5	weeks	5	43	Mean	mg/dL	34.2	0.9	5.9	28.3	40.1	SD	mg/dL	34.2	34	30	30	0.9	5.90169	28.2983	40.1017	NA
8	Wang 2015	Intervention	NCT01235832	Table 7	Lower-Fat	NA	PP	Summary	Outcome	Lipids	IDL-C	IDL-C I	IDL-C, IDL1	Blood	5	weeks	5	43	Mean	mg/dL	NA	NA	NA	NA	NA	SD	mg/dL	NA	NA	NA	NA	NA	NA	NA	NA	NA
8	Wang 2015	Intervention	NCT01235832	Table 7	Lower-Fat	NA	PP	Summary	Outcome	Lipids	IDL-C	IDL-C II	IDL-C, IDL2	Blood	5	weeks	5	43	Mean	mg/dL	NA	NA	NA	NA	NA	SD	mg/dL	NA	NA	NA	NA	NA	NA	NA	NA	NA
8	Wang 2015	Intervention	NCT01235832	Table 7	Lower-Fat	NA	PP	Summary	Outcome	Lipids	LDL-C	LDL-C I	LDL-C, LDL1	Blood	5	weeks	5	43	Mean	mg/dL	19.4	1.1	7.21	12.19	26.61	SD	mg/dL	19.4	19	15	10	1.1	7.21318	12.1868	26.6132	NA
8	Wang 2015	Intervention	NCT01235832	Table 7	Lower-Fat	NA	PP	Summary	Outcome	Lipids	LDL-C	LDL-C I+II	LDL-C, LDL1+2	Blood	5	weeks	5	43	Mean	mg/dL	44.1	3.3	21.64	22.46	65.74	SD	mg/dL	44.1	44	40	40	3.3	21.6395	22.4605	65.7395	NA
8	Wang 2015	Intervention	NCT01235832	Table 7	Lower-Fat	NA	PP	Summary	Outcome	Lipids	LDL-C	LDL-C II	LDL-C, LDL2	Blood	5	weeks	5	43	Mean	mg/dL	24.7	2.5	16.39	8.31	41.09	SD	mg/dL	24.7	24	20	20	2.5	16.3936	8.3064	41.0936	NA
8	Wang 2015	Intervention	NCT01235832	Table 7	Lower-Fat	NA	PP	Summary	Outcome	Lipids	LDL-C	LDL-C III	LDL-C, LDL3	Blood	5	weeks	5	43	Mean	mg/dL	42.2	2.3	15.08	27.12	57.28	SD	mg/dL	42.2	42	40	40	2.3	15.0821	27.1179	57.2821	NA
8	Wang 2015	Intervention	NCT01235832	Table 7	Lower-Fat	NA	PP	Summary	Outcome	Lipids	LDL-C	LDL-C III+IV	LDL-C, LDL3+4	Blood	5	weeks	5	43	Mean	mg/dL	54.9	3.5	22.95	31.95	77.85	SD	mg/dL	54.9	54	50	50	3.5	22.951	31.949	77.851	NA
8	Wang 2015	Intervention	NCT01235832	Table 7	Lower-Fat	NA	PP	Summary	Outcome	Lipids	LDL-C	LDL-C IV	LDL-C, LDL4	Blood	5	weeks	5	43	Mean	mg/dL	12.6	1.6	10.49	2.11	23.09	SD	mg/dL	12.6	12	10	10	1.6	10.4919	2.1081	23.0919	NA
8	Wang 2015	Intervention	NCT01235832	Table 7	Lower-Fat	NA	PP	Summary	Outcome	Lipids	Peak max time	LDL peak max time	LDL peak max time	Blood	5	weeks	5	43	Mean	sec	NA	NA	NA	NA	NA	SD	sec	NA	NA	NA	NA	NA	NA	NA	NA	NA
8	Wang 2015	Intervention	NCT01235832	Table 7	Lower-Fat	NA	PP	Summary	Outcome	Lipids	VLDL-C	VLDL-C	Remnant Lp	Blood	5	weeks	5	43	Mean	mg/dL	NA	NA	NA	NA	NA	SD	mg/dL	NA	NA	NA	NA	NA	NA	NA	NA	NA
8	Wang 2015	Intervention	NCT01235832	Table 7	Lower-Fat	NA	PP	Summary	Outcome	Lipids	VLDL-C	VLDL-C I+II	VLDL-C, VLDL1+2	Blood	5	weeks	5	43	Mean	mg/dL	NA	NA	NA	NA	NA	SD	mg/dL	NA	NA	NA	NA	NA	NA	NA	NA	NA
8	Wang 2015	Intervention	NCT01235832	Table 7	Lower-Fat	NA	PP	Summary	Outcome	Lipids	VLDL-C	VLDL-C III	VLDL-C, VLDL3	Blood	5	weeks	5	43	Mean	mg/dL	NA	NA	NA	NA	NA	SD	mg/dL	NA	NA	NA	NA	NA	NA	NA	NA	NA
8	Wang 2015	Intervention	NCT01235832	Table 7	Moderate-Fat	NA	PP	Summary	Outcome	Lipids	HDL-C	HDL-C II	HDL-C, HDL2	Blood	5	weeks	5	42	Mean	mg/dL	10.9	0.6	3.89	7.01	14.79	SD	mg/dL	10.9	10	10	10	0.6	3.88844	7.01156	14.7884	NA
8	Wang 2015	Intervention	NCT01235832	Table 7	Moderate-Fat	NA	PP	Summary	Outcome	Lipids	HDL-C	HDL-C III	HDL-C, HDL3	Blood	5	weeks	5	42	Mean	mg/dL	36.1	1	6.48	29.62	42.58	SD	mg/dL	36.1	36	35	30	1	6.48074	29.6193	42.5807	NA
8	Wang 2015	Intervention	NCT01235832	Table 7	Moderate-Fat	NA	PP	Summary	Outcome	Lipids	IDL-C	IDL-C I	IDL-C, IDL1	Blood	5	weeks	5	42	Mean	mg/dL	NA	NA	NA	NA	NA	SD	mg/dL	NA	NA	NA	NA	NA	NA	NA	NA	NA
8	Wang 2015	Intervention	NCT01235832	Table 7	Moderate-Fat	NA	PP	Summary	Outcome	Lipids	IDL-C	IDL-C II	IDL-C, IDL2	Blood	5	weeks	5	42	Mean	mg/dL	NA	NA	NA	NA	NA	SD	mg/dL	NA	NA	NA	NA	NA	NA	NA	NA	NA
8	Wang 2015	Intervention	NCT01235832	Table 7	Moderate-Fat	NA	PP	Summary	Outcome	Lipids	LDL-C	LDL-C I	LDL-C, LDL1	Blood	5	weeks	5	42	Mean	mg/dL	18.4	0.9	5.83	12.57	24.23	SD	mg/dL	18.4	18	15	10	0.9	5.83267	12.5673	24.2327	NA
8	Wang 2015	Intervention	NCT01235832	Table 7	Moderate-Fat	NA	PP	Summary	Outcome	Lipids	LDL-C	LDL-C I+II	LDL-C, LDL1+2	Blood	5	weeks	5	42	Mean	mg/dL	43.6	2.7	17.5	26.1	61.1	SD	mg/dL	43.6	43	40	40	2.7	17.498	26.102	61.098	NA
8	Wang 2015	Intervention	NCT01235832	Table 7	Moderate-Fat	NA	PP	Summary	Outcome	Lipids	LDL-C	LDL-C II	LDL-C, LDL2	Blood	5	weeks	5	42	Mean	mg/dL	25.2	2.1	13.61	11.59	38.81	SD	mg/dL	25.2	25	25	20	2.1	13.6096	11.5904	38.8096	NA
8	Wang 2015	Intervention	NCT01235832	Table 7	Moderate-Fat	NA	PP	Summary	Outcome	Lipids	LDL-C	LDL-C III	LDL-C, LDL3	Blood	5	weeks	5	42	Mean	mg/dL	43.4	1.9	12.31	31.09	55.71	SD	mg/dL	43.4	43	40	40	1.9	12.3134	31.0866	55.7134	NA
8	Wang 2015	Intervention	NCT01235832	Table 7	Moderate-Fat	NA	PP	Summary	Outcome	Lipids	LDL-C	LDL-C III+IV	LDL-C, LDL3+4	Blood	5	weeks	5	42	Mean	mg/dL	54.6	3	19.44	35.16	74.04	SD	mg/dL	54.6	54	50	50	3	19.4422	35.1578	74.0422	NA
8	Wang 2015	Intervention	NCT01235832	Table 7	Moderate-Fat	NA	PP	Summary	Outcome	Lipids	LDL-C	LDL-C IV	LDL-C, LDL4	Blood	5	weeks	5	42	Mean	mg/dL	11.2	1.4	9.07	2.13	20.27	SD	mg/dL	11.2	11	10	10	1.4	9.07304	2.12696	20.273	NA
8	Wang 2015	Intervention	NCT01235832	Table 7	Moderate-Fat	NA	PP	Summary	Outcome	Lipids	Peak max time	LDL peak max time	LDL peak max time	Blood	5	weeks	5	42	Mean	sec	NA	NA	NA	NA	NA	SD	sec	NA	NA	NA	NA	NA	NA	NA	NA	NA
8	Wang 2015	Intervention	NCT01235832	Table 7	Moderate-Fat	NA	PP	Summary	Outcome	Lipids	VLDL-C	VLDL-C	Remnant Lp	Blood	5	weeks	5	42	Mean	mg/dL	NA	NA	NA	NA	NA	SD	mg/dL	NA	NA	NA	NA	NA	NA	NA	NA	NA
8	Wang 2015	Intervention	NCT01235832	Table 7	Moderate-Fat	NA	PP	Summary	Outcome	Lipids	VLDL-C	VLDL-C I+II	VLDL-C, VLDL1+2	Blood	5	weeks	5	42	Mean	mg/dL	NA	NA	NA	NA	NA	SD	mg/dL	NA	NA	NA	NA	NA	NA	NA	NA	NA
8	Wang 2015	Intervention	NCT01235832	Table 7	Moderate-Fat	NA	PP	Summary	Outcome	Lipids	VLDL-C	VLDL-C III	VLDL-C, VLDL3	Blood	5	weeks	5	42	Mean	mg/dL	NA	NA	NA	NA	NA	SD	mg/dL	NA	NA	NA	NA	NA	NA	NA	NA	NA
8	Wang 2015	Intervention	NCT01235832	Table 8	Avocado diet	40-69 years old participants	PP	Within	Outcome	CVD risk factors	CVD	Estimated ASCVD 10-year risk	Estimated ASCVD 10-year risk	NA	5	weeks	5		Mean	%, change-in	NA	NA	NA	NA	NA	95%CI	%, change-in	NA	NA	NA	NA	NA	NA	NA	NA	NA
8	Wang 2015	Intervention	NCT01235832	Table 8	Avocado diet	20-59 years old participants	PP	Within	Outcome	CVD risk factors	CVD	Estimated ASCVD lifetime risk	Estimated ASCVD lifetime risk	NA	5	weeks	5		Mean	%, change-in	NA	NA	NA	NA	NA	95%CI	%, change-in	NA	NA	NA	NA	NA	NA	NA	NA	NA
8	Wang 2015	Intervention	NCT01235832	Table 8	Baseline Average American Diet	40-69 years old participants	ITT	Summary	Outcome	CVD risk factors	CVD	Estimated ASCVD 10-year risk	Estimated ASCVD 10-year risk	NA	5	weeks	5	26	Mean	%	NA	NA	NA	NA	NA	95%CI	%	NA	NA	NA	NA	NA	NA	NA	NA	NA
8	Wang 2015	Intervention	NCT01235832	Table 8	Baseline Average American Diet	20-59 years old participants	ITT	Summary	Outcome	CVD risk factors	CVD	Estimated ASCVD lifetime risk	Estimated ASCVD lifetime risk	NA	5	weeks	5	39	Mean	%	NA	NA	NA	NA	NA	95%CI	%	NA	NA	NA	NA	NA	NA	NA	NA	NA
8	Wang 2015	Intervention	NCT01235832	Table 8	Lower-Fat	40-69 years old participants	PP	Within	Outcome	CVD risk factors	CVD	Estimated ASCVD 10-year risk	Estimated ASCVD 10-year risk	NA	5	weeks	5		Mean	%, change-in	NA	NA	NA	NA	NA	95%CI	%, change-in	NA	NA	NA	NA	NA	NA	NA	NA	NA
8	Wang 2015	Intervention	NCT01235832	Table 8	Lower-Fat	20-59 years old participants	PP	Within	Outcome	CVD risk factors	CVD	Estimated ASCVD lifetime risk	Estimated ASCVD lifetime risk	NA	5	weeks	5		Mean	%, change-in	NA	NA	NA	NA	NA	95%CI	%, change-in	NA	NA	NA	NA	NA	NA	NA	NA	NA
8	Wang 2015	Intervention	NCT01235832	Table 8	Moderate-Fat	40-69 years old participants	PP	Within	Outcome	CVD risk factors	CVD	Estimated ASCVD 10-year risk	Estimated ASCVD 10-year risk	NA	5	weeks	5		Mean	%, change-in	NA	NA	NA	NA	NA	95%CI	%, change-in	NA	NA	NA	NA	NA	NA	NA	NA	NA
8	Wang 2015	Intervention	NCT01235832	Table 8	Moderate-Fat	20-59 years old participants	PP	Within	Outcome	CVD risk factors	CVD	Estimated ASCVD lifetime risk	Estimated ASCVD lifetime risk	NA	5	weeks	5		Mean	%, change-in	NA	NA	NA	NA	NA	95%CI	%, change-in	NA	NA	NA	NA	NA	NA	NA	NA	NA
9	Edwards 2020	Intervention	Persea americana for Total Health (PATH) Study (NCT02740439)	Table 2	Avocado	NA	PP	Summary	Outcome	Anthropometry	BMI	BMI	BMI	NA	12	weeks	12	47	Mean	kg/m^2	32.52	0.83	5.69	26.83	38.21	SD	kg/m^2	32.52	32	30	30	0.829972	5.69	26.83	38.21	NA
9	Edwards 2020	Intervention	Persea americana for Total Health (PATH) Study (NCT02740439)	Table 2	Avocado	NA	PP	Summary	Outcome	Anthropometry	Body fat	Body fat	Whole body % fat	NA	12	weeks	12	47	Mean	%	NA	NA	NA	NA	NA	SD	%	NA	NA	NA	NA	NA	NA	NA	NA	NA
9	Edwards 2020	Intervention	Persea americana for Total Health (PATH) Study (NCT02740439)	Table 2	Avocado	NA	PP	Summary	Outcome	Nutrient bioavailability	Lutein	Lutein	Lutein	Blood	12	weeks	12	47	Mean	umol/L	NA	NA	NA	NA	NA	SD	μmol/L	NA	NA	NA	NA	NA	NA	NA	NA	NA
9	Edwards 2020	Intervention	Persea americana for Total Health (PATH) Study (NCT02740439)	Table 2	Avocado	NA	PP	Summary	Outcome	Nutrient bioavailability	Macular pigment optical density	Macular pigment optical density	Macular pigment optical density	NA	12	weeks	12	47	Mean	d.u	NA	NA	NA	NA	NA	SD	d.u	NA	NA	NA	NA	NA	NA	NA	NA	NA
9	Edwards 2020	Intervention	Persea americana for Total Health (PATH) Study (NCT02740439)	Table 2	Avocado	NA	PP	Summary	Subject Characteristics	Dietary patterns	Adherence	Consumption	Consumption	NA		NA		47	Mean	%	NA	NA	NA	NA	NA	min,max	%	NA	NA	NA	NA	NA	NA	NA	NA	NA
9	Edwards 2020	Intervention	Persea americana for Total Health (PATH) Study (NCT02740439)	Table 2	Avocado	NA	PP	Summary	Subject Characteristics	Age	Age	Age	Age	NA		NA		47	Mean	years	34.6	0.83	5.7	25	45	min,max	years	34.6	34	30	30	0.83143	5.7	25	45	NA
9	Edwards 2020	Intervention	Persea americana for Total Health (PATH) Study (NCT02740439)	Table 2	Avocado	NA	PP	Summary	Subject Characteristics	Anthropometry	BMI	BMI	BMI	NA		NA		47	Mean	kg/m^2	32.49	0.85	5.83	25	49.4	min,max	kg/m^2	32.49	32	30	30	0.850393	5.83	25	49.4	NA
9	Edwards 2020	Intervention	Persea americana for Total Health (PATH) Study (NCT02740439)	Table 2	Avocado	NA	PP	Summary	Subject Characteristics	Anthropometry	Body fat	Body fat	Whole body % fat	NA		NA		47	Mean	%	NA	NA	NA	NA	NA	min,max	%	NA	NA	NA	NA	NA	NA	NA	NA	NA
9	Edwards 2020	Intervention	Persea americana for Total Health (PATH) Study (NCT02740439)	Table 2	Avocado	NA	PP	Summary	Subject Characteristics	Lifestyle	Education	College or higher	Highest education, college	NA		NA		47	Mean	%	NA	NA	NA	NA	NA	NA	%	NA	NA	NA	NA	NA	NA	NA	NA	NA
9	Edwards 2020	Intervention	Persea americana for Total Health (PATH) Study (NCT02740439)	Table 2	Avocado	NA	PP	Summary	Subject Characteristics	Lifestyle	Education	College or higher	Highest education, post-college	NA		NA		47	Mean	%	NA	NA	NA	NA	NA	NA	%	NA	NA	NA	NA	NA	NA	NA	NA	NA
9	Edwards 2020	Intervention	Persea americana for Total Health (PATH) Study (NCT02740439)	Table 2	Avocado	NA	PP	Summary	Subject Characteristics	Lifestyle	Education	High school	Highest education, high school	NA		NA		47	Mean	%	NA	NA	NA	NA	NA	NA	%	NA	NA	NA	NA	NA	NA	NA	NA	NA
9	Edwards 2020	Intervention	Persea americana for Total Health (PATH) Study (NCT02740439)	Table 2	Avocado	NA	PP	Summary	Subject Characteristics	Other	Intelligence quotient	Intelligence quotient	Intelligence quotient	NA		NA		47	Mean	IQ score	NA	NA	NA	NA	NA	min,max	IQ score	NA	NA	NA	NA	NA	NA	NA	NA	NA
9	Edwards 2020	Intervention	Persea americana for Total Health (PATH) Study (NCT02740439)	Table 2	Avocado	NA	PP	Summary	Subject Characteristics	Carotenoids	Lutein	Lutein	Serum lutein	NA		NA		47	Mean	µmol/L	NA	NA	NA	NA	NA	min,max	μmol/L	NA	NA	NA	NA	NA	NA	NA	NA	NA
9	Edwards 2020	Intervention	Persea americana for Total Health (PATH) Study (NCT02740439)	Table 2	Avocado	NA	PP	Summary	Subject Characteristics	Other	Macular pigment optical density	Macular pigment optical density	Macular pigment optical density	NA		NA		47	Mean	d.u	NA	NA	NA	NA	NA	min,max	d.u	NA	NA	NA	NA	NA	NA	NA	NA	NA
9	Edwards 2020	Intervention	Persea americana for Total Health (PATH) Study (NCT02740439)	Table 2	Avocado	NA	PP	Summary	Subject Characteristics	Sex	Sex	Female	Sex, F	NA		NA		47	Mean	%	48.9362					NA	%	48.9362	48	45	40					NA
9	Edwards 2020	Intervention	Persea americana for Total Health (PATH) Study (NCT02740439)	Table 2	Avocado	NA	PP	Summary	Subject Characteristics	Sex	Sex	Male	Sex, M	NA		NA		47	Mean	%	31.9149					NA	%	31.9149	31	30	30					NA
9	Edwards 2020	Intervention	Persea americana for Total Health (PATH) Study (NCT02740439)	Table 2	Control	NA	PP	Summary	Outcome	Anthropometry	BMI	BMI	BMI	NA	12	weeks	12	37	Mean	kg/m^2	31.13	0.96	5.82	25.31	36.95	SD	kg/m^2	31.13	31	30	30	0.956802	5.82	25.31	36.95	NA
9	Edwards 2020	Intervention	Persea americana for Total Health (PATH) Study (NCT02740439)	Table 2	Control	NA	PP	Summary	Outcome	Anthropometry	Body fat	Body fat	Whole body % fat	NA	12	weeks	12	37	Mean	%	NA	NA	NA	NA	NA	SD	%	NA	NA	NA	NA	NA	NA	NA	NA	NA
9	Edwards 2020	Intervention	Persea americana for Total Health (PATH) Study (NCT02740439)	Table 2	Control	NA	PP	Summary	Outcome	Nutrient bioavailability	Lutein	Lutein	Lutein	Blood	12	weeks	12	37	Mean	umol/L	NA	NA	NA	NA	NA	SD	μmol/L	NA	NA	NA	NA	NA	NA	NA	NA	NA
9	Edwards 2020	Intervention	Persea americana for Total Health (PATH) Study (NCT02740439)	Table 2	Control	NA	PP	Summary	Outcome	Nutrient bioavailability	Macular pigment optical density	Macular pigment optical density	Macular pigment optical density	NA	12	weeks	12	37	Mean	d.u	NA	NA	NA	NA	NA	SD	d.u	NA	NA	NA	NA	NA	NA	NA	NA	NA
9	Edwards 2020	Intervention	Persea americana for Total Health (PATH) Study (NCT02740439)	Table 2	Control	NA	PP	Summary	Subject Characteristics	Dietary patterns	Adherence	Consumption	Consumption	NA		NA		37	Mean	%	NA	NA	NA	NA	NA	min,max	%	NA	NA	NA	NA	NA	NA	NA	NA	NA
9	Edwards 2020	Intervention	Persea americana for Total Health (PATH) Study (NCT02740439)	Table 2	Control	NA	PP	Summary	Subject Characteristics	Age	Age	Age	Age	NA		NA		37	Mean	years	34	1.02	6.2	25	45	min,max	years	34	34	30	30	1.01927	6.2	25	45	NA
9	Edwards 2020	Intervention	Persea americana for Total Health (PATH) Study (NCT02740439)	Table 2	Control	NA	PP	Summary	Subject Characteristics	Anthropometry	BMI	BMI	BMI	NA		NA		37	Mean	kg/m^2	31.31	0.9	5.49	25	46.57	min,max	kg/m^2	31.31	31	30	30	0.90255	5.49	25	46.57	NA
9	Edwards 2020	Intervention	Persea americana for Total Health (PATH) Study (NCT02740439)	Table 2	Control	NA	PP	Summary	Subject Characteristics	Anthropometry	Body fat	Body fat	Whole body % fat	NA		NA		37	Mean	%	NA	NA	NA	NA	NA	min,max	%	NA	NA	NA	NA	NA	NA	NA	NA	NA
9	Edwards 2020	Intervention	Persea americana for Total Health (PATH) Study (NCT02740439)	Table 2	Control	NA	PP	Summary	Subject Characteristics	Lifestyle	Education	College or higher	Highest education, college	NA		NA		37	Mean	%	NA	NA	NA	NA	NA	NA	%	NA	NA	NA	NA	NA	NA	NA	NA	NA
9	Edwards 2020	Intervention	Persea americana for Total Health (PATH) Study (NCT02740439)	Table 2	Control	NA	PP	Summary	Subject Characteristics	Lifestyle	Education	College or higher	Highest education, post-college	NA		NA		37	Mean	%	NA	NA	NA	NA	NA	NA	%	NA	NA	NA	NA	NA	NA	NA	NA	NA
9	Edwards 2020	Intervention	Persea americana for Total Health (PATH) Study (NCT02740439)	Table 2	Control	NA	PP	Summary	Subject Characteristics	Lifestyle	Education	High school	Highest education, high school	NA		NA		37	Mean	%	NA	NA	NA	NA	NA	NA	%	NA	NA	NA	NA	NA	NA	NA	NA	NA
9	Edwards 2020	Intervention	Persea americana for Total Health (PATH) Study (NCT02740439)	Table 2	Control	NA	PP	Summary	Subject Characteristics	Other	Intelligence quotient	Intelligence quotient	Intelligence quotient	NA		NA		37	Mean	IQ score	NA	NA	NA	NA	NA	min,max	IQ score	NA	NA	NA	NA	NA	NA	NA	NA	NA
9	Edwards 2020	Intervention	Persea americana for Total Health (PATH) Study (NCT02740439)	Table 2	Control	NA	PP	Summary	Subject Characteristics	Carotenoids	Lutein	Lutein	Serum lutein	NA		NA		37	Mean	µmol/L	NA	NA	NA	NA	NA	min,max	μmol/L	NA	NA	NA	NA	NA	NA	NA	NA	NA
9	Edwards 2020	Intervention	Persea americana for Total Health (PATH) Study (NCT02740439)	Table 2	Control	NA	PP	Summary	Subject Characteristics	Other	Macular pigment optical density	Macular pigment optical density	Macular pigment optical density	NA		NA		37	Mean	d.u	NA	NA	NA	NA	NA	min,max	d.u	NA	NA	NA	NA	NA	NA	NA	NA	NA
9	Edwards 2020	Intervention	Persea americana for Total Health (PATH) Study (NCT02740439)	Table 2	Control	NA	PP	Summary	Subject Characteristics	Sex	Sex	Female	Sex, F	NA		NA		37	Mean	%	48.6486					NA	%	48.6486	48	45	40					NA
9	Edwards 2020	Intervention	Persea americana for Total Health (PATH) Study (NCT02740439)	Table 2	Control	NA	PP	Summary	Subject Characteristics	Sex	Sex	Male	Sex, M	NA		NA		37	Mean	%	43.2432					NA	%	43.2432	43	40	40					NA
9	Edwards 2020	Intervention	Persea americana for Total Health (PATH) Study (NCT02740439)	Table 3	Avocado	NA	PP	Summary	Outcome	Cognition	Flanker task	Flanker task, congruent accuracy	Flanker task, congruent accuracy	NA	0	weeks	0	47	Mean	%	NA	NA	NA	NA	NA	SD	%	NA	NA	NA	NA	NA	NA	NA	NA	NA
9	Edwards 2020	Intervention	Persea americana for Total Health (PATH) Study (NCT02740439)	Table 3	Avocado	NA	PP	Summary	Outcome	Cognition	Flanker task	Flanker task, congruent accuracy	Flanker task, congruent accuracy	NA	12	weeks	12	47	Mean	%	NA	NA	NA	NA	NA	SD	%	NA	NA	NA	NA	NA	NA	NA	NA	NA
9	Edwards 2020	Intervention	Persea americana for Total Health (PATH) Study (NCT02740439)	Table 3	Avocado	NA	PP	Summary	Outcome	Cognition	Flanker task	Flanker task, congruent RT	Flanker task, congruent RT	NA	0	weeks	0	47	Mean	ms	NA	NA	NA	NA	NA	SD	ms	NA	NA	NA	NA	NA	NA	NA	NA	NA
9	Edwards 2020	Intervention	Persea americana for Total Health (PATH) Study (NCT02740439)	Table 3	Avocado	NA	PP	Summary	Outcome	Cognition	Flanker task	Flanker task, congruent RT	Flanker task, congruent RT	NA	12	weeks	12	47	Mean	ms	NA	NA	NA	NA	NA	SD	ms	NA	NA	NA	NA	NA	NA	NA	NA	NA
9	Edwards 2020	Intervention	Persea americana for Total Health (PATH) Study (NCT02740439)	Table 3	Avocado	NA	PP	Summary	Outcome	Cognition	Flanker task	Flanker task, incongruent accuracy	Flanker task, incongruent accuracy	NA	0	weeks	0	47	Mean	%	NA	NA	NA	NA	NA	SD	%	NA	NA	NA	NA	NA	NA	NA	NA	NA
9	Edwards 2020	Intervention	Persea americana for Total Health (PATH) Study (NCT02740439)	Table 3	Avocado	NA	PP	Summary	Outcome	Cognition	Flanker task	Flanker task, incongruent accuracy	Flanker task, incongruent accuracy	NA	12	weeks	12	47	Mean	%	NA	NA	NA	NA	NA	SD	%	NA	NA	NA	NA	NA	NA	NA	NA	NA
9	Edwards 2020	Intervention	Persea americana for Total Health (PATH) Study (NCT02740439)	Table 3	Avocado	NA	PP	Summary	Outcome	Cognition	Flanker task	Flanker task, incongruent RT	Flanker task, incongruent RT	NA	0	weeks	0	47	Mean	ms	NA	NA	NA	NA	NA	SD	ms	NA	NA	NA	NA	NA	NA	NA	NA	NA
9	Edwards 2020	Intervention	Persea americana for Total Health (PATH) Study (NCT02740439)	Table 3	Avocado	NA	PP	Summary	Outcome	Cognition	Flanker task	Flanker task, incongruent RT	Flanker task, incongruent RT	NA	12	weeks	12	47	Mean	ms	NA	NA	NA	NA	NA	SD	ms	NA	NA	NA	NA	NA	NA	NA	NA	NA
9	Edwards 2020	Intervention	Persea americana for Total Health (PATH) Study (NCT02740439)	Table 3	Avocado	NA	PP	Summary	Outcome	Cognition	Flanker task	Flanker task, overall accuaracy	Flanker task, overall accuaracy	NA	0	weeks	0	47	Mean	%	NA	NA	NA	NA	NA	SD	%	NA	NA	NA	NA	NA	NA	NA	NA	NA
9	Edwards 2020	Intervention	Persea americana for Total Health (PATH) Study (NCT02740439)	Table 3	Avocado	NA	PP	Summary	Outcome	Cognition	Flanker task	Flanker task, overall accuaracy	Flanker task, overall accuaracy	NA	12	weeks	12	47	Mean	%	NA	NA	NA	NA	NA	SD	%	NA	NA	NA	NA	NA	NA	NA	NA	NA
9	Edwards 2020	Intervention	Persea americana for Total Health (PATH) Study (NCT02740439)	Table 3	Avocado	NA	PP	Summary	Outcome	Cognition	Flanker task	Flanker task, overall RT	Flanker task, overall RT	NA	0	weeks	0	47	Mean	ms	NA	NA	NA	NA	NA	SD	ms	NA	NA	NA	NA	NA	NA	NA	NA	NA
9	Edwards 2020	Intervention	Persea americana for Total Health (PATH) Study (NCT02740439)	Table 3	Avocado	NA	PP	Summary	Outcome	Cognition	Flanker task	Flanker task, overall RT	Flanker task, overall RT	NA	12	weeks	12	47	Mean	ms	NA	NA	NA	NA	NA	SD	ms	NA	NA	NA	NA	NA	NA	NA	NA	NA
9	Edwards 2020	Intervention	Persea americana for Total Health (PATH) Study (NCT02740439)	Table 3	Avocado	NA	PP	Summary	Outcome	Cognition	Flanker task	Flanker task, trials	Flanker task, useable ERP trials	NA	0	weeks	0	47	Mean	Count	NA	NA	NA	NA	NA	SD	Count	NA	NA	NA	NA	NA	NA	NA	NA	NA
9	Edwards 2020	Intervention	Persea americana for Total Health (PATH) Study (NCT02740439)	Table 3	Avocado	NA	PP	Summary	Outcome	Cognition	Flanker task	Flanker task, trials	Flanker task, useable ERP trials	NA	12	weeks	12	47	Mean	Count	NA	NA	NA	NA	NA	SD	Count	NA	NA	NA	NA	NA	NA	NA	NA	NA
9	Edwards 2020	Intervention	Persea americana for Total Health (PATH) Study (NCT02740439)	Table 3	Avocado	NA	PP	Summary	Outcome	Cognition	NoGo task	NoGo task, non-target accuracy	NoGo task, non-target accuracy	NA	0	weeks	0	47	Mean	%	NA	NA	NA	NA	NA	SD	%	NA	NA	NA	NA	NA	NA	NA	NA	NA
9	Edwards 2020	Intervention	Persea americana for Total Health (PATH) Study (NCT02740439)	Table 3	Avocado	NA	PP	Summary	Outcome	Cognition	NoGo task	NoGo task, non-target accuracy	NoGo task, non-target accuracy	NA	12	weeks	12	47	Mean	%	NA	NA	NA	NA	NA	SD	%	NA	NA	NA	NA	NA	NA	NA	NA	NA
9	Edwards 2020	Intervention	Persea americana for Total Health (PATH) Study (NCT02740439)	Table 3	Avocado	NA	PP	Summary	Outcome	Cognition	NoGo task	NoGo task, non-target RT	NoGo task, non-target RT	NA	0	weeks	0	47	Mean	ms	NA	NA	NA	NA	NA	SD	ms	NA	NA	NA	NA	NA	NA	NA	NA	NA
9	Edwards 2020	Intervention	Persea americana for Total Health (PATH) Study (NCT02740439)	Table 3	Avocado	NA	PP	Summary	Outcome	Cognition	NoGo task	NoGo task, non-target RT	NoGo task, non-target RT	NA	12	weeks	12	47	Mean	ms	NA	NA	NA	NA	NA	SD	ms	NA	NA	NA	NA	NA	NA	NA	NA	NA
9	Edwards 2020	Intervention	Persea americana for Total Health (PATH) Study (NCT02740439)	Table 3	Avocado	NA	PP	Summary	Outcome	Cognition	NoGo task	NoGo task, overall accuracy	NoGo task, overall accuracy	NA	0	weeks	0	47	Mean	%	NA	NA	NA	NA	NA	SD	%	NA	NA	NA	NA	NA	NA	NA	NA	NA
9	Edwards 2020	Intervention	Persea americana for Total Health (PATH) Study (NCT02740439)	Table 3	Avocado	NA	PP	Summary	Outcome	Cognition	NoGo task	NoGo task, overall accuracy	NoGo task, overall accuracy	NA	12	weeks	12	47	Mean	%	NA	NA	NA	NA	NA	SD	%	NA	NA	NA	NA	NA	NA	NA	NA	NA
9	Edwards 2020	Intervention	Persea americana for Total Health (PATH) Study (NCT02740439)	Table 3	Avocado	NA	PP	Summary	Outcome	Cognition	NoGo task	NoGo task, target accuracy	NoGo task, target accuracy	NA	0	weeks	0	47	Mean	%	NA	NA	NA	NA	NA	SD	%	NA	NA	NA	NA	NA	NA	NA	NA	NA
9	Edwards 2020	Intervention	Persea americana for Total Health (PATH) Study (NCT02740439)	Table 3	Avocado	NA	PP	Summary	Outcome	Cognition	NoGo task	NoGo task, target accuracy	NoGo task, target accuracy	NA	12	weeks	12	47	Mean	%	NA	NA	NA	NA	NA	SD	%	NA	NA	NA	NA	NA	NA	NA	NA	NA
9	Edwards 2020	Intervention	Persea americana for Total Health (PATH) Study (NCT02740439)	Table 3	Avocado	NA	PP	Summary	Outcome	Cognition	NoGo task	NoGo task, usable ERP trials	NoGo task, usable ERP trials	NA	0	weeks	0	47	Mean	Count	NA	NA	NA	NA	NA	SD	Count	NA	NA	NA	NA	NA	NA	NA	NA	NA
9	Edwards 2020	Intervention	Persea americana for Total Health (PATH) Study (NCT02740439)	Table 3	Avocado	NA	PP	Summary	Outcome	Cognition	NoGo task	NoGo task, usable ERP trials	NoGo task, usable ERP trials	NA	12	weeks	12	47	Mean	Count	NA	NA	NA	NA	NA	SD	Count	NA	NA	NA	NA	NA	NA	NA	NA	NA
9	Edwards 2020	Intervention	Persea americana for Total Health (PATH) Study (NCT02740439)	Table 3	Avocado	NA	PP	Summary	Outcome	Cognition	Oddball task	Oddball task, non-target accuracy	Oddball task, non-target accuracy	NA	0	weeks	0	47	Mean	%	NA	NA	NA	NA	NA	SD	%	NA	NA	NA	NA	NA	NA	NA	NA	NA
9	Edwards 2020	Intervention	Persea americana for Total Health (PATH) Study (NCT02740439)	Table 3	Avocado	NA	PP	Summary	Outcome	Cognition	Oddball task	Oddball task, non-target accuracy	Oddball task, non-target accuracy	NA	12	weeks	12	47	Mean	%	NA	NA	NA	NA	NA	SD	%	NA	NA	NA	NA	NA	NA	NA	NA	NA
9	Edwards 2020	Intervention	Persea americana for Total Health (PATH) Study (NCT02740439)	Table 3	Avocado	NA	PP	Summary	Outcome	Cognition	Oddball task	Oddball task, overall accuracy	Oddball task, overall accuracy	NA	0	weeks	0	47	Mean	%	NA	NA	NA	NA	NA	SD	%	NA	NA	NA	NA	NA	NA	NA	NA	NA
9	Edwards 2020	Intervention	Persea americana for Total Health (PATH) Study (NCT02740439)	Table 3	Avocado	NA	PP	Summary	Outcome	Cognition	Oddball task	Oddball task, overall accuracy	Oddball task, overall accuracy	NA	12	weeks	12	47	Mean	%	NA	NA	NA	NA	NA	SD	%	NA	NA	NA	NA	NA	NA	NA	NA	NA
9	Edwards 2020	Intervention	Persea americana for Total Health (PATH) Study (NCT02740439)	Table 3	Avocado	NA	PP	Summary	Outcome	Cognition	Oddball task	Oddball task, target accuracy	Oddball task, target accuracy	NA	0	weeks	0	47	Mean	%	NA	NA	NA	NA	NA	SD	%	NA	NA	NA	NA	NA	NA	NA	NA	NA
9	Edwards 2020	Intervention	Persea americana for Total Health (PATH) Study (NCT02740439)	Table 3	Avocado	NA	PP	Summary	Outcome	Cognition	Oddball task	Oddball task, target accuracy	Oddball task, target accuracy	NA	12	weeks	12	47	Mean	%	NA	NA	NA	NA	NA	SD	%	NA	NA	NA	NA	NA	NA	NA	NA	NA
9	Edwards 2020	Intervention	Persea americana for Total Health (PATH) Study (NCT02740439)	Table 3	Avocado	NA	PP	Summary	Outcome	Cognition	Oddball task	Oddball task, target RT	Oddball task, target RT	NA	0	weeks	0	47	Mean	ms	NA	NA	NA	NA	NA	SD	ms	NA	NA	NA	NA	NA	NA	NA	NA	NA
9	Edwards 2020	Intervention	Persea americana for Total Health (PATH) Study (NCT02740439)	Table 3	Avocado	NA	PP	Summary	Outcome	Cognition	Oddball task	Oddball task, target RT	Oddball task, target RT	NA	12	weeks	12	47	Mean	ms	NA	NA	NA	NA	NA	SD	ms	NA	NA	NA	NA	NA	NA	NA	NA	NA
9	Edwards 2020	Intervention	Persea americana for Total Health (PATH) Study (NCT02740439)	Table 3	Avocado	NA	PP	Summary	Outcome	Cognition	Oddball task	Oddball task, trials	Oddball task, usable ERP trials	NA	0	weeks	0	47	Mean	Count	NA	NA	NA	NA	NA	SD	Count	NA	NA	NA	NA	NA	NA	NA	NA	NA
9	Edwards 2020	Intervention	Persea americana for Total Health (PATH) Study (NCT02740439)	Table 3	Avocado	NA	PP	Summary	Outcome	Cognition	Oddball task	Oddball task, trials	Oddball task, usable ERP trials	NA	12	weeks	12	47	Mean	Count	NA	NA	NA	NA	NA	SD	Count	NA	NA	NA	NA	NA	NA	NA	NA	NA
9	Edwards 2020	Intervention	Persea americana for Total Health (PATH) Study (NCT02740439)	Table 3	Control	NA	PP	Summary	Outcome	Cognition	Flanker task	Flanker task, congruent accuracy	Flanker task, congruent accuracy	NA	0	weeks	0	37	Mean	%	NA	NA	NA	NA	NA	SD	%	NA	NA	NA	NA	NA	NA	NA	NA	NA
9	Edwards 2020	Intervention	Persea americana for Total Health (PATH) Study (NCT02740439)	Table 3	Control	NA	PP	Summary	Outcome	Cognition	Flanker task	Flanker task, congruent accuracy	Flanker task, congruent accuracy	NA	12	weeks	12	37	Mean	%	NA	NA	NA	NA	NA	SD	%	NA	NA	NA	NA	NA	NA	NA	NA	NA
9	Edwards 2020	Intervention	Persea americana for Total Health (PATH) Study (NCT02740439)	Table 3	Control	NA	PP	Summary	Outcome	Cognition	Flanker task	Flanker task, congruent RT	Flanker task, congruent RT	NA	0	weeks	0	37	Mean	ms	NA	NA	NA	NA	NA	SD	ms	NA	NA	NA	NA	NA	NA	NA	NA	NA
9	Edwards 2020	Intervention	Persea americana for Total Health (PATH) Study (NCT02740439)	Table 3	Control	NA	PP	Summary	Outcome	Cognition	Flanker task	Flanker task, congruent RT	Flanker task, congruent RT	NA	12	weeks	12	37	Mean	ms	NA	NA	NA	NA	NA	SD	ms	NA	NA	NA	NA	NA	NA	NA	NA	NA
9	Edwards 2020	Intervention	Persea americana for Total Health (PATH) Study (NCT02740439)	Table 3	Control	NA	PP	Summary	Outcome	Cognition	Flanker task	Flanker task, incongruent accuracy	Flanker task, incongruent accuracy	NA	0	weeks	0	37	Mean	%	NA	NA	NA	NA	NA	SD	%	NA	NA	NA	NA	NA	NA	NA	NA	NA
9	Edwards 2020	Intervention	Persea americana for Total Health (PATH) Study (NCT02740439)	Table 3	Control	NA	PP	Summary	Outcome	Cognition	Flanker task	Flanker task, incongruent accuracy	Flanker task, incongruent accuracy	NA	12	weeks	12	37	Mean	%	NA	NA	NA	NA	NA	SD	%	NA	NA	NA	NA	NA	NA	NA	NA	NA
9	Edwards 2020	Intervention	Persea americana for Total Health (PATH) Study (NCT02740439)	Table 3	Control	NA	PP	Summary	Outcome	Cognition	Flanker task	Flanker task, incongruent RT	Flanker task, incongruent RT	NA	0	weeks	0	37	Mean	ms	NA	NA	NA	NA	NA	SD	ms	NA	NA	NA	NA	NA	NA	NA	NA	NA
9	Edwards 2020	Intervention	Persea americana for Total Health (PATH) Study (NCT02740439)	Table 3	Control	NA	PP	Summary	Outcome	Cognition	Flanker task	Flanker task, incongruent RT	Flanker task, incongruent RT	NA	12	weeks	12	37	Mean	ms	NA	NA	NA	NA	NA	SD	ms	NA	NA	NA	NA	NA	NA	NA	NA	NA
9	Edwards 2020	Intervention	Persea americana for Total Health (PATH) Study (NCT02740439)	Table 3	Control	NA	PP	Summary	Outcome	Cognition	Flanker task	Flanker task, overall accuaracy	Flanker task, overall accuaracy	NA	0	weeks	0	37	Mean	%	NA	NA	NA	NA	NA	SD	%	NA	NA	NA	NA	NA	NA	NA	NA	NA
9	Edwards 2020	Intervention	Persea americana for Total Health (PATH) Study (NCT02740439)	Table 3	Control	NA	PP	Summary	Outcome	Cognition	Flanker task	Flanker task, overall accuaracy	Flanker task, overall accuaracy	NA	12	weeks	12	37	Mean	%	NA	NA	NA	NA	NA	SD	%	NA	NA	NA	NA	NA	NA	NA	NA	NA
9	Edwards 2020	Intervention	Persea americana for Total Health (PATH) Study (NCT02740439)	Table 3	Control	NA	PP	Summary	Outcome	Cognition	Flanker task	Flanker task, overall RT	Flanker task, overall RT	NA	0	weeks	0	37	Mean	ms	NA	NA	NA	NA	NA	SD	ms	NA	NA	NA	NA	NA	NA	NA	NA	NA
9	Edwards 2020	Intervention	Persea americana for Total Health (PATH) Study (NCT02740439)	Table 3	Control	NA	PP	Summary	Outcome	Cognition	Flanker task	Flanker task, overall RT	Flanker task, overall RT	NA	12	weeks	12	37	Mean	ms	NA	NA	NA	NA	NA	SD	ms	NA	NA	NA	NA	NA	NA	NA	NA	NA
9	Edwards 2020	Intervention	Persea americana for Total Health (PATH) Study (NCT02740439)	Table 3	Control	NA	PP	Summary	Outcome	Cognition	Flanker task	Flanker task, trials	Flanker task, useable ERP trials	NA	0	weeks	0	37	Mean	Count	NA	NA	NA	NA	NA	SD	Count	NA	NA	NA	NA	NA	NA	NA	NA	NA
9	Edwards 2020	Intervention	Persea americana for Total Health (PATH) Study (NCT02740439)	Table 3	Control	NA	PP	Summary	Outcome	Cognition	Flanker task	Flanker task, trials	Flanker task, useable ERP trials	NA	12	weeks	12	37	Mean	Count	NA	NA	NA	NA	NA	SD	Count	NA	NA	NA	NA	NA	NA	NA	NA	NA
9	Edwards 2020	Intervention	Persea americana for Total Health (PATH) Study (NCT02740439)	Table 3	Control	NA	PP	Summary	Outcome	Cognition	NoGo task	NoGo task, non-target accuracy	NoGo task, non-target accuracy	NA	0	weeks	0	37	Mean	%	NA	NA	NA	NA	NA	SD	%	NA	NA	NA	NA	NA	NA	NA	NA	NA
9	Edwards 2020	Intervention	Persea americana for Total Health (PATH) Study (NCT02740439)	Table 3	Control	NA	PP	Summary	Outcome	Cognition	NoGo task	NoGo task, non-target accuracy	NoGo task, non-target accuracy	NA	12	weeks	12	37	Mean	%	NA	NA	NA	NA	NA	SD	%	NA	NA	NA	NA	NA	NA	NA	NA	NA
9	Edwards 2020	Intervention	Persea americana for Total Health (PATH) Study (NCT02740439)	Table 3	Control	NA	PP	Summary	Outcome	Cognition	NoGo task	NoGo task, non-target RT	NoGo task, non-target RT	NA	0	weeks	0	37	Mean	ms	NA	NA	NA	NA	NA	SD	ms	NA	NA	NA	NA	NA	NA	NA	NA	NA
9	Edwards 2020	Intervention	Persea americana for Total Health (PATH) Study (NCT02740439)	Table 3	Control	NA	PP	Summary	Outcome	Cognition	NoGo task	NoGo task, non-target RT	NoGo task, non-target RT	NA	12	weeks	12	37	Mean	ms	NA	NA	NA	NA	NA	SD	ms	NA	NA	NA	NA	NA	NA	NA	NA	NA
9	Edwards 2020	Intervention	Persea americana for Total Health (PATH) Study (NCT02740439)	Table 3	Control	NA	PP	Summary	Outcome	Cognition	NoGo task	NoGo task, overall accuracy	NoGo task, overall accuracy	NA	0	weeks	0	37	Mean	%	NA	NA	NA	NA	NA	SD	%	NA	NA	NA	NA	NA	NA	NA	NA	NA
9	Edwards 2020	Intervention	Persea americana for Total Health (PATH) Study (NCT02740439)	Table 3	Control	NA	PP	Summary	Outcome	Cognition	NoGo task	NoGo task, overall accuracy	NoGo task, overall accuracy	NA	12	weeks	12	37	Mean	%	NA	NA	NA	NA	NA	SD	%	NA	NA	NA	NA	NA	NA	NA	NA	NA
9	Edwards 2020	Intervention	Persea americana for Total Health (PATH) Study (NCT02740439)	Table 3	Control	NA	PP	Summary	Outcome	Cognition	NoGo task	NoGo task, target accuracy	NoGo task, target accuracy	NA	0	weeks	0	37	Mean	%	NA	NA	NA	NA	NA	SD	%	NA	NA	NA	NA	NA	NA	NA	NA	NA
9	Edwards 2020	Intervention	Persea americana for Total Health (PATH) Study (NCT02740439)	Table 3	Control	NA	PP	Summary	Outcome	Cognition	NoGo task	NoGo task, target accuracy	NoGo task, target accuracy	NA	12	weeks	12	37	Mean	%	NA	NA	NA	NA	NA	SD	%	NA	NA	NA	NA	NA	NA	NA	NA	NA
9	Edwards 2020	Intervention	Persea americana for Total Health (PATH) Study (NCT02740439)	Table 3	Control	NA	PP	Summary	Outcome	Cognition	NoGo task	NoGo task, usable ERP trials	NoGo task, usable ERP trials	NA	0	weeks	0	37	Mean	Count	NA	NA	NA	NA	NA	SD	Count	NA	NA	NA	NA	NA	NA	NA	NA	NA
9	Edwards 2020	Intervention	Persea americana for Total Health (PATH) Study (NCT02740439)	Table 3	Control	NA	PP	Summary	Outcome	Cognition	NoGo task	NoGo task, usable ERP trials	NoGo task, usable ERP trials	NA	12	weeks	12	37	Mean	Count	NA	NA	NA	NA	NA	SD	Count	NA	NA	NA	NA	NA	NA	NA	NA	NA
9	Edwards 2020	Intervention	Persea americana for Total Health (PATH) Study (NCT02740439)	Table 3	Control	NA	PP	Summary	Outcome	Cognition	Oddball task	Oddball task, non-target accuracy	Oddball task, non-target accuracy	NA	0	weeks	0	37	Mean	%	NA	NA	NA	NA	NA	SD	%	NA	NA	NA	NA	NA	NA	NA	NA	NA
9	Edwards 2020	Intervention	Persea americana for Total Health (PATH) Study (NCT02740439)	Table 3	Control	NA	PP	Summary	Outcome	Cognition	Oddball task	Oddball task, non-target accuracy	Oddball task, non-target accuracy	NA	12	weeks	12	37	Mean	%	NA	NA	NA	NA	NA	SD	%	NA	NA	NA	NA	NA	NA	NA	NA	NA
9	Edwards 2020	Intervention	Persea americana for Total Health (PATH) Study (NCT02740439)	Table 3	Control	NA	PP	Summary	Outcome	Cognition	Oddball task	Oddball task, overall accuracy	Oddball task, overall accuracy	NA	0	weeks	0	37	Mean	%	NA	NA	NA	NA	NA	SD	%	NA	NA	NA	NA	NA	NA	NA	NA	NA
9	Edwards 2020	Intervention	Persea americana for Total Health (PATH) Study (NCT02740439)	Table 3	Control	NA	PP	Summary	Outcome	Cognition	Oddball task	Oddball task, overall accuracy	Oddball task, overall accuracy	NA	12	weeks	12	37	Mean	%	NA	NA	NA	NA	NA	SD	%	NA	NA	NA	NA	NA	NA	NA	NA	NA
9	Edwards 2020	Intervention	Persea americana for Total Health (PATH) Study (NCT02740439)	Table 3	Control	NA	PP	Summary	Outcome	Cognition	Oddball task	Oddball task, target accuracy	Oddball task, target accuracy	NA	0	weeks	0	37	Mean	%	NA	NA	NA	NA	NA	SD	%	NA	NA	NA	NA	NA	NA	NA	NA	NA
9	Edwards 2020	Intervention	Persea americana for Total Health (PATH) Study (NCT02740439)	Table 3	Control	NA	PP	Summary	Outcome	Cognition	Oddball task	Oddball task, target accuracy	Oddball task, target accuracy	NA	12	weeks	12	37	Mean	%	NA	NA	NA	NA	NA	SD	%	NA	NA	NA	NA	NA	NA	NA	NA	NA
9	Edwards 2020	Intervention	Persea americana for Total Health (PATH) Study (NCT02740439)	Table 3	Control	NA	PP	Summary	Outcome	Cognition	Oddball task	Oddball task, target RT	Oddball task, target RT	NA	0	weeks	0	37	Mean	ms	NA	NA	NA	NA	NA	SD	ms	NA	NA	NA	NA	NA	NA	NA	NA	NA
9	Edwards 2020	Intervention	Persea americana for Total Health (PATH) Study (NCT02740439)	Table 3	Control	NA	PP	Summary	Outcome	Cognition	Oddball task	Oddball task, target RT	Oddball task, target RT	NA	12	weeks	12	37	Mean	ms	NA	NA	NA	NA	NA	SD	ms	NA	NA	NA	NA	NA	NA	NA	NA	NA
9	Edwards 2020	Intervention	Persea americana for Total Health (PATH) Study (NCT02740439)	Table 3	Control	NA	PP	Summary	Outcome	Cognition	Oddball task	Oddball task, trials	Oddball task, usable ERP trials	NA	0	weeks	0	37	Mean	Count	NA	NA	NA	NA	NA	SD	Count	NA	NA	NA	NA	NA	NA	NA	NA	NA
9	Edwards 2020	Intervention	Persea americana for Total Health (PATH) Study (NCT02740439)	Table 3	Control	NA	PP	Summary	Outcome	Cognition	Oddball task	Oddball task, trials	Oddball task, usable ERP trials	NA	12	weeks	12	37	Mean	Count	NA	NA	NA	NA	NA	SD	Count	NA	NA	NA	NA	NA	NA	NA	NA	NA
9	Edwards 2020	Intervention	Persea americana for Total Health (PATH) Study (NCT02740439)	Table1	Avocado	Female	Planned	Summary	Dietary	Avocado intake	Avocado intake	Avocado intake	Avocado intake	NA		NA		23	Absolute value	g/d	140					NA	g/d	140	140	140	140					NA
9	Edwards 2020	Intervention	Persea americana for Total Health (PATH) Study (NCT02740439)	Table1	Avocado	Male	Planned	Summary	Dietary	Avocado intake	Avocado intake	Avocado intake	Avocado intake	NA		NA		15	Absolute value	g/d	175					NA	g/d	175	175	175	170					NA
9	Edwards 2020	Intervention	Persea americana for Total Health (PATH) Study (NCT02740439)	Table1	Control	NA	Planned	Summary	Dietary	Avocado intake	Avocado intake	Avocado intake	Avocado intake	NA		NA		37	Absolute value	g/d	0					NA	g/d	0	0	0	0					NA
11	Li 2013	Intervention	Li 2013	Fig 1a	Burger patty alone	NA	ITT	Summary	Outcome	CVD risk factors	Peripheral arterial tonometry	Peripheral arterial tonometry score 0h	Peripheral arterial tonometry score 0h	NA	0	weeks	0	11	Mean	score	NA	NA	NA	NA	NA	SD	score	NA	NA	NA	NA	NA	NA	NA	NA	NA
11	Li 2013	Intervention	Li 2013	Fig 1a	Burger patty alone	NA	ITT	Summary	Outcome	CVD risk factors	Peripheral arterial tonometry	Peripheral arterial tonometry score 2h	Peripheral arterial tonometry score 2h	NA		NA		11	Mean	score	NA	NA	NA	NA	NA	SD	score	NA	NA	NA	NA	NA	NA	NA	NA	NA
11	Li 2013	Intervention	Li 2013	Fig 1a	Burger patty with avocado	NA	ITT	Summary	Outcome	CVD risk factors	Peripheral arterial tonometry	Peripheral arterial tonometry score 0h	Peripheral arterial tonometry score 0h	NA	0	weeks	0	11	Mean	score	NA	NA	NA	NA	NA	SD	score	NA	NA	NA	NA	NA	NA	NA	NA	NA
11	Li 2013	Intervention	Li 2013	Fig 1a	Burger patty with avocado	NA	ITT	Summary	Outcome	CVD risk factors	Peripheral arterial tonometry	Peripheral arterial tonometry score 2h	Peripheral arterial tonometry score 2h	NA		NA		11	Mean	score	NA	NA	NA	NA	NA	SD	score	NA	NA	NA	NA	NA	NA	NA	NA	NA
11	Li 2013	Intervention	Li 2013	Figure 2	Burger patty alone	NA	ITT	Summary	Outcome	Antioxidation	NOx	NOx	NOx	Serum		NA		11	NA	uM	NA	NA	NA	NA	NA	NA	μM	NA	NA	NA	NA	NA	NA	NA	NA	NA
11	Li 2013	Intervention	Li 2013	Figure 2	Burger patty with avocado	NA	ITT	Summary	Outcome	Antioxidation	NOx	NOx	NOx	Serum		NA		11	NA	uM	NA	NA	NA	NA	NA	NA	μM	NA	NA	NA	NA	NA	NA	NA	NA	NA
11	Li 2013	Intervention	Li 2013	Figure 3a	Burger patty alone	NA	ITT	Summary	Outcome	Immune	IL-6	IL-6	IL-6	Serum		NA		9	NA	pg/ml	NA	NA	NA	NA	NA	NA	pg/mL	NA	NA	NA	NA	NA	NA	NA	NA	NA
11	Li 2013	Intervention	Li 2013	Figure 3a	Burger patty with avocado	NA	ITT	Summary	Outcome	Immune	IL-6	IL-6	IL-6	Serum		NA		9	NA	pg/ml	NA	NA	NA	NA	NA	NA	pg/mL	NA	NA	NA	NA	NA	NA	NA	NA	NA
11	Li 2013	Intervention	Li 2013	Figure 3b	Burger patty alone	NA	ITT	Summary	Outcome	Immune	TNF-a	TNF-a	TNF-a	Serum		NA		9	NA	pg/ml	NA	NA	NA	NA	NA	NA	pg/mL	NA	NA	NA	NA	NA	NA	NA	NA	NA
11	Li 2013	Intervention	Li 2013	Figure 3b	Burger patty with avocado	NA	ITT	Summary	Outcome	Immune	TNF-a	TNF-a	TNF-a	Serum		NA		9	NA	pg/ml	NA	NA	NA	NA	NA	NA	pg/mL	NA	NA	NA	NA	NA	NA	NA	NA	NA
11	Li 2013	Intervention	Li 2013	Figure 4	Burger patty alone	NA	ITT	Summary	Outcome	Immune	IkBa	IkBa	IkBa	Blood		NA		9	NA	% of baseline	NA	NA	NA	NA	NA	NA	% of baseline	NA	NA	NA	NA	NA	NA	NA	NA	NA
11	Li 2013	Intervention	Li 2013	Figure 4	Burger patty with avocado	NA	ITT	Summary	Outcome	Immune	IkBa	IkBa	IkBa	Blood		NA		9	NA	% of baseline	NA	NA	NA	NA	NA	NA	% of baseline	NA	NA	NA	NA	NA	NA	NA	NA	NA
11	Li 2013	Intervention	Li 2013	Figure 5	Burger patty alone	NA	ITT	Summary	Outcome	Lipids	Triglycerides	Triglycerides	Triglycerides	Blood		NA		11	NA	mg/dL						NA	mg/dL									NA
11	Li 2013	Intervention	Li 2013	Figure 5	Burger patty with avocado	NA	ITT	Summary	Outcome	Lipids	Triglycerides	Triglycerides	Triglycerides	Blood		NA		11	NA	mg/dL						NA	mg/dL									NA
11	Li 2013	Intervention	Li 2013	Methods section	All subjects	NA	ITT	Summary	Subject Characteristics	Sex	Sex	Female	Female	NA		NA		11	Percentage	%	0					NA	%	0	0	0	0					NA
11	Li 2013	Intervention	Li 2013	Methods section	All subjects	NA	ITT	Summary	Subject Characteristics	Sex	Sex	Male	Male	NA		NA		11	Percentage	%	100					NA	%	100	100	100	100					NA
11	Li 2013	Intervention	Li 2013	Methods section	Burger patty alone	NA	Planned	Summary	Dietary	Avocado intake	Avocado intake	Avocado intake	Avocado intake	NA		NA		11	Absolute value	g per test meal	0					NA	g/test meal	0	0	0	0					NA
11	Li 2013	Intervention	Li 2013	Methods section	Burger patty with avocado	NA	Planned	Summary	Dietary	Avocado intake	Avocado intake	Avocado intake	Avocado intake	NA		NA		11	Absolute value	g per test meal	68					NA	g/test meal	68	68	65	60					NA
11	Li 2013	Intervention	Li 2013	Table 1	All subjects	NA	ITT	Summary	Subject Characteristics	Age	Age	Age	Age	NA		NA		11	Mean	years	25.4	1.72	5.7	19.7	31.1	SD	years	25.4	25	25	20	1.71861	5.7	19.7	31.1	NA
11	Li 2013	Intervention	Li 2013	Table 1	All subjects	NA	ITT	Summary	Subject Characteristics	Anthropometry	BMI	BMI	BMI	NA		NA		11	Mean	kg/m^2	23.9	0.69	2.3	21.6	26.2	SD	kg/m^2	23.9	23	20	20	0.693476	2.3	21.6	26.2	NA
11	Li 2013	Intervention	Li 2013	Table 1	All subjects	NA	ITT	Summary	Subject Characteristics	Race	Race	African-American	Race, black	NA		NA		11	Percentage	%	NA	NA	NA	NA	NA	NA	%	NA	NA	NA	NA	NA	NA	NA	NA	NA
11	Li 2013	Intervention	Li 2013	Table 1	All subjects	NA	ITT	Summary	Subject Characteristics	Race	Race	Asian	Race, asian	NA		NA		11	Percentage	%	NA	NA	NA	NA	NA	NA	%	NA	NA	NA	NA	NA	NA	NA	NA	NA
11	Li 2013	Intervention	Li 2013	Table 1	All subjects	NA	ITT	Summary	Subject Characteristics	Race	Race	Caucasian	Race, Caucasian	NA		NA		11	Percentage	%	NA	NA	NA	NA	NA	NA	%	NA	NA	NA	NA	NA	NA	NA	NA	NA
11	Li 2013	Intervention	Li 2013	Table 1	All subjects	NA	ITT	Summary	Subject Characteristics	Race	Race	Hispanic	Race, hispanic	NA		NA		11	Percentage	%	NA	NA	NA	NA	NA	NA	%	NA	NA	NA	NA	NA	NA	NA	NA	NA
12	Haddad 2018	Intervention	NCT01271829	Results section	All	NA	PP	Summary	Subject Characteristics	Age	Age	Age	Age	NA		NA		26	Mean	years	40.8	2.16	11	29.8	51.8	SD	years	40.8	40	40	40	2.15728	11	29.8	51.8	NA
12	Haddad 2018	Intervention	NCT01271829	Results section	All	NA	PP	Summary	Subject Characteristics	Anthropometry	BMI	BMI	BMI	NA		NA		26	Mean	kg/m^2	28.1	0.47	2.4	25.7	30.5	SD	kg/m^2	28.1	28	25	20	0.470679	2.4	25.7	30.5	NA
12	Haddad 2018	Intervention	NCT01271829	Results section	All	NA	PP	Summary	Subject Characteristics	Sex	Sex	Female	Women	NA		NA		26	Count	Count	16					NA	Count	16	16	15	10					NA
12	Haddad 2018	Intervention	NCT01271829	Results section	All	NA	PP	Summary	Subject Characteristics	Sex	Sex	Female	Women	NA		NA		26	Percentage	%	61.5385					NA	%	61.5385	61	60	60					NA
12	Haddad 2018	Intervention	NCT01271829	Results section	All	NA	PP	Summary	Subject Characteristics	Sex	Sex	Male	Men	NA		NA		26	Count	Count	10					NA	Count	10	10	10	10					NA
12	Haddad 2018	Intervention	NCT01271829	Results section	All	NA	PP	Summary	Subject Characteristics	Sex	Sex	Male	Men	NA		NA		26	Percentage	%	38.4615					NA	%	38.4615	38	35	30					NA
12	Haddad 2018	Intervention	NCT01271829	Results section	Avocado added	NA	Planned	Summary	Dietary	Avocado intake	Avocado intake	Avocado intake	Avocado intake	NA		NA		26	Average	g per test meal	67.5			50	90	min,max	g/test meal	67.5	67	65	60			50	90	NA
12	Haddad 2018	Intervention	NCT01271829	Results section	Avocado inclusive	NA	Planned	Summary	Dietary	Avocado intake	Avocado intake	Avocado intake	Avocado intake	NA		NA		26	Average	g per test meal	67.5			50	90	min,max	g/test meal	67.5	67	65	60			50	90	NA
12	Haddad 2018	Intervention	NCT01271829	Results section	Control	NA	Planned	Summary	Dietary	Avocado intake	Avocado intake	Avocado intake	Avocado intake	NA		NA		26	Average	g per test meal	0					NA	g/test meal	0	0	0	0					NA
12	Haddad 2018	Intervention	NCT01271829	Supplementary Table 1	Avocado added	NA	PP	Summary	Outcome	Satiety	Ghrelin	Ghrelin .5h	Ghrelin .5h	Blood		NA		26	Mean	pg/ml	NA	NA	NA	NA	NA	95%CI	pg/ml	NA	NA	NA	NA	NA	NA	NA	NA	NA
12	Haddad 2018	Intervention	NCT01271829	Supplementary Table 1	Avocado added	NA	PP	Summary	Outcome	Satiety	Ghrelin	Ghrelin 0h	Ghrelin 0h	Blood	0	weeks	0	26	Mean	pg/ml	NA	NA	NA	NA	NA	95%CI	pg/ml	NA	NA	NA	NA	NA	NA	NA	NA	NA
12	Haddad 2018	Intervention	NCT01271829	Supplementary Table 1	Avocado added	NA	PP	Summary	Outcome	Satiety	Ghrelin	Ghrelin 1h	Ghrelin 1h	Blood		NA		26	Mean	pg/ml	NA	NA	NA	NA	NA	95%CI	pg/ml	NA	NA	NA	NA	NA	NA	NA	NA	NA
12	Haddad 2018	Intervention	NCT01271829	Supplementary Table 1	Avocado added	NA	PP	Summary	Outcome	Satiety	Ghrelin	Ghrelin 2h	Ghrelin 2h	Blood		NA		26	Mean	pg/ml	NA	NA	NA	NA	NA	95%CI	pg/ml	NA	NA	NA	NA	NA	NA	NA	NA	NA
12	Haddad 2018	Intervention	NCT01271829	Supplementary Table 1	Avocado added	NA	PP	Summary	Outcome	Satiety	Ghrelin	Ghrelin 3h	Ghrelin 3h	Blood		NA		26	Mean	pg/ml	NA	NA	NA	NA	NA	95%CI	pg/ml	NA	NA	NA	NA	NA	NA	NA	NA	NA
12	Haddad 2018	Intervention	NCT01271829	Supplementary Table 1	Avocado added	NA	PP	Summary	Outcome	Satiety	GIP	GIP .5h	GIP .5h	Blood		NA		26	Mean	pg/ml	NA	NA	NA	NA	NA	95%CI	pg/ml	NA	NA	NA	NA	NA	NA	NA	NA	NA
12	Haddad 2018	Intervention	NCT01271829	Supplementary Table 1	Avocado added	NA	PP	Summary	Outcome	Satiety	GIP	GIP 0h	GIP 0h	Blood	0	weeks	0	26	Mean	pg/ml	NA	NA	NA	NA	NA	95%CI	pg/ml	NA	NA	NA	NA	NA	NA	NA	NA	NA
12	Haddad 2018	Intervention	NCT01271829	Supplementary Table 1	Avocado added	NA	PP	Summary	Outcome	Satiety	GIP	GIP 1h	GIP 1h	Blood		NA		26	Mean	pg/ml	NA	NA	NA	NA	NA	95%CI	pg/ml	NA	NA	NA	NA	NA	NA	NA	NA	NA
12	Haddad 2018	Intervention	NCT01271829	Supplementary Table 1	Avocado added	NA	PP	Summary	Outcome	Satiety	GIP	GIP 2h	GIP 2h	Blood		NA		26	Mean	pg/ml	NA	NA	NA	NA	NA	95%CI	pg/ml	NA	NA	NA	NA	NA	NA	NA	NA	NA
12	Haddad 2018	Intervention	NCT01271829	Supplementary Table 1	Avocado added	NA	PP	Summary	Outcome	Satiety	GIP	GIP 3h	GIP 3h	Blood		NA		26	Mean	pg/ml	NA	NA	NA	NA	NA	95%CI	pg/ml	NA	NA	NA	NA	NA	NA	NA	NA	NA
12	Haddad 2018	Intervention	NCT01271829	Supplementary Table 1	Avocado added	NA	PP	Summary	Outcome	Satiety	GLP-1	GLP-1 .5h	GLP-1 .5h	Blood		NA		26	Mean	pmol/L	NA	NA	NA	NA	NA	95%CI	pmol/L	NA	NA	NA	NA	NA	NA	NA	NA	NA
12	Haddad 2018	Intervention	NCT01271829	Supplementary Table 1	Avocado added	NA	PP	Summary	Outcome	Satiety	GLP-1	GLP-1 0h	GLP-1 0h	Blood	0	weeks	0	26	Mean	pmol/L	NA	NA	NA	NA	NA	95%CI	pmol/L	NA	NA	NA	NA	NA	NA	NA	NA	NA
12	Haddad 2018	Intervention	NCT01271829	Supplementary Table 1	Avocado added	NA	PP	Summary	Outcome	Satiety	GLP-1	GLP-1 1h	GLP-1 1h	Blood		NA		26	Mean	pmol/L	NA	NA	NA	NA	NA	95%CI	pmol/L	NA	NA	NA	NA	NA	NA	NA	NA	NA
12	Haddad 2018	Intervention	NCT01271829	Supplementary Table 1	Avocado added	NA	PP	Summary	Outcome	Satiety	GLP-1	GLP-1 2h	GLP-1 2h	Blood		NA		26	Mean	pmol/L	NA	NA	NA	NA	NA	95%CI	pmol/L	NA	NA	NA	NA	NA	NA	NA	NA	NA
12	Haddad 2018	Intervention	NCT01271829	Supplementary Table 1	Avocado added	NA	PP	Summary	Outcome	Satiety	GLP-1	GLP-1 3h	GLP-1 3h	Blood		NA		26	Mean	pmol/L	NA	NA	NA	NA	NA	95%CI	pmol/L	NA	NA	NA	NA	NA	NA	NA	NA	NA
12	Haddad 2018	Intervention	NCT01271829	Supplementary Table 1	Avocado added	NA	PP	Summary	Outcome	Satiety	PYY	PYY .5h	PYY .5h	Blood		NA		26	Mean	ng/L	NA	NA	NA	NA	NA	95%CI	pg/mL	NA	NA	NA	NA	NA	NA	NA	NA	NA
12	Haddad 2018	Intervention	NCT01271829	Supplementary Table 1	Avocado added	NA	PP	Summary	Outcome	Satiety	PYY	PYY 0h	PYY 0h	Blood	0	weeks	0	26	Mean	ng/L	NA	NA	NA	NA	NA	95%CI	pg/mL	NA	NA	NA	NA	NA	NA	NA	NA	NA
12	Haddad 2018	Intervention	NCT01271829	Supplementary Table 1	Avocado added	NA	PP	Summary	Outcome	Satiety	PYY	PYY 1h	PYY 1h	Blood		NA		26	Mean	ng/L	NA	NA	NA	NA	NA	95%CI	pg/mL	NA	NA	NA	NA	NA	NA	NA	NA	NA
12	Haddad 2018	Intervention	NCT01271829	Supplementary Table 1	Avocado added	NA	PP	Summary	Outcome	Satiety	PYY	PYY 2h	PYY 2h	Blood		NA		26	Mean	ng/L	NA	NA	NA	NA	NA	95%CI	pg/mL	NA	NA	NA	NA	NA	NA	NA	NA	NA
12	Haddad 2018	Intervention	NCT01271829	Supplementary Table 1	Avocado added	NA	PP	Summary	Outcome	Satiety	PYY	PYY 3h	PYY 3h	Blood		NA		26	Mean	ng/L	NA	NA	NA	NA	NA	95%CI	pg/mL	NA	NA	NA	NA	NA	NA	NA	NA	NA
12	Haddad 2018	Intervention	NCT01271829	Supplementary Table 1	Avocado inclusive	NA	PP	Summary	Outcome	Satiety	Ghrelin	Ghrelin .5h	Ghrelin .5h	Blood		NA		26	Mean	pg/ml	NA	NA	NA	NA	NA	95%CI	pg/ml	NA	NA	NA	NA	NA	NA	NA	NA	NA
12	Haddad 2018	Intervention	NCT01271829	Supplementary Table 1	Avocado inclusive	NA	PP	Summary	Outcome	Satiety	Ghrelin	Ghrelin 0h	Ghrelin 0h	Blood	0	weeks	0	26	Mean	pg/ml	NA	NA	NA	NA	NA	95%CI	pg/ml	NA	NA	NA	NA	NA	NA	NA	NA	NA
12	Haddad 2018	Intervention	NCT01271829	Supplementary Table 1	Avocado inclusive	NA	PP	Summary	Outcome	Satiety	Ghrelin	Ghrelin 1h	Ghrelin 1h	Blood		NA		26	Mean	pg/ml	NA	NA	NA	NA	NA	95%CI	pg/ml	NA	NA	NA	NA	NA	NA	NA	NA	NA
12	Haddad 2018	Intervention	NCT01271829	Supplementary Table 1	Avocado inclusive	NA	PP	Summary	Outcome	Satiety	Ghrelin	Ghrelin 2h	Ghrelin 2h	Blood		NA		26	Mean	pg/ml	NA	NA	NA	NA	NA	95%CI	pg/ml	NA	NA	NA	NA	NA	NA	NA	NA	NA
12	Haddad 2018	Intervention	NCT01271829	Supplementary Table 1	Avocado inclusive	NA	PP	Summary	Outcome	Satiety	Ghrelin	Ghrelin 3h	Ghrelin 3h	Blood		NA		26	Mean	pg/ml	NA	NA	NA	NA	NA	95%CI	pg/ml	NA	NA	NA	NA	NA	NA	NA	NA	NA
12	Haddad 2018	Intervention	NCT01271829	Supplementary Table 1	Avocado inclusive	NA	PP	Summary	Outcome	Satiety	GIP	GIP .5h	GIP .5h	Blood		NA		26	Mean	pg/ml	NA	NA	NA	NA	NA	95%CI	pg/ml	NA	NA	NA	NA	NA	NA	NA	NA	NA
12	Haddad 2018	Intervention	NCT01271829	Supplementary Table 1	Avocado inclusive	NA	PP	Summary	Outcome	Satiety	GIP	GIP 0h	GIP 0h	Blood	0	weeks	0	26	Mean	pg/ml	NA	NA	NA	NA	NA	95%CI	pg/ml	NA	NA	NA	NA	NA	NA	NA	NA	NA
12	Haddad 2018	Intervention	NCT01271829	Supplementary Table 1	Avocado inclusive	NA	PP	Summary	Outcome	Satiety	GIP	GIP 1h	GIP 1h	Blood		NA		26	Mean	pg/ml	NA	NA	NA	NA	NA	95%CI	pg/ml	NA	NA	NA	NA	NA	NA	NA	NA	NA
12	Haddad 2018	Intervention	NCT01271829	Supplementary Table 1	Avocado inclusive	NA	PP	Summary	Outcome	Satiety	GIP	GIP 2h	GIP 2h	Blood		NA		26	Mean	pg/ml	NA	NA	NA	NA	NA	95%CI	pg/ml	NA	NA	NA	NA	NA	NA	NA	NA	NA
12	Haddad 2018	Intervention	NCT01271829	Supplementary Table 1	Avocado inclusive	NA	PP	Summary	Outcome	Satiety	GIP	GIP 3h	GIP 3h	Blood		NA		26	Mean	pg/ml	NA	NA	NA	NA	NA	95%CI	pg/ml	NA	NA	NA	NA	NA	NA	NA	NA	NA
12	Haddad 2018	Intervention	NCT01271829	Supplementary Table 1	Avocado inclusive	NA	PP	Summary	Outcome	Satiety	GLP-1	GLP-1 .5h	GLP-1 .5h	Blood		NA		26	Mean	pmol/L	NA	NA	NA	NA	NA	95%CI	pmol/L	NA	NA	NA	NA	NA	NA	NA	NA	NA
12	Haddad 2018	Intervention	NCT01271829	Supplementary Table 1	Avocado inclusive	NA	PP	Summary	Outcome	Satiety	GLP-1	GLP-1 0h	GLP-1 0h	Blood	0	weeks	0	26	Mean	pmol/L	NA	NA	NA	NA	NA	95%CI	pmol/L	NA	NA	NA	NA	NA	NA	NA	NA	NA
12	Haddad 2018	Intervention	NCT01271829	Supplementary Table 1	Avocado inclusive	NA	PP	Summary	Outcome	Satiety	GLP-1	GLP-1 1h	GLP-1 1h	Blood		NA		26	Mean	pmol/L	NA	NA	NA	NA	NA	95%CI	pmol/L	NA	NA	NA	NA	NA	NA	NA	NA	NA
12	Haddad 2018	Intervention	NCT01271829	Supplementary Table 1	Avocado inclusive	NA	PP	Summary	Outcome	Satiety	GLP-1	GLP-1 2h	GLP-1 2h	Blood		NA		26	Mean	pmol/L	NA	NA	NA	NA	NA	95%CI	pmol/L	NA	NA	NA	NA	NA	NA	NA	NA	NA
12	Haddad 2018	Intervention	NCT01271829	Supplementary Table 1	Avocado inclusive	NA	PP	Summary	Outcome	Satiety	GLP-1	GLP-1 3h	GLP-1 3h	Blood		NA		26	Mean	pmol/L	NA	NA	NA	NA	NA	95%CI	pmol/L	NA	NA	NA	NA	NA	NA	NA	NA	NA
12	Haddad 2018	Intervention	NCT01271829	Supplementary Table 1	Avocado inclusive	NA	PP	Summary	Outcome	Satiety	PYY	PYY .5h	PYY .5h	Blood		NA		26	Mean	ng/L	NA	NA	NA	NA	NA	95%CI	pg/mL	NA	NA	NA	NA	NA	NA	NA	NA	NA
12	Haddad 2018	Intervention	NCT01271829	Supplementary Table 1	Avocado inclusive	NA	PP	Summary	Outcome	Satiety	PYY	PYY 0h	PYY 0h	Blood	0	weeks	0	26	Mean	ng/L	NA	NA	NA	NA	NA	95%CI	pg/mL	NA	NA	NA	NA	NA	NA	NA	NA	NA
12	Haddad 2018	Intervention	NCT01271829	Supplementary Table 1	Avocado inclusive	NA	PP	Summary	Outcome	Satiety	PYY	PYY 1h	PYY 1h	Blood		NA		26	Mean	ng/L	NA	NA	NA	NA	NA	95%CI	pg/mL	NA	NA	NA	NA	NA	NA	NA	NA	NA
12	Haddad 2018	Intervention	NCT01271829	Supplementary Table 1	Avocado inclusive	NA	PP	Summary	Outcome	Satiety	PYY	PYY 2h	PYY 2h	Blood		NA		26	Mean	ng/L	NA	NA	NA	NA	NA	95%CI	pg/mL	NA	NA	NA	NA	NA	NA	NA	NA	NA
12	Haddad 2018	Intervention	NCT01271829	Supplementary Table 1	Avocado inclusive	NA	PP	Summary	Outcome	Satiety	PYY	PYY 3h	PYY 3h	Blood		NA		26	Mean	ng/L	NA	NA	NA	NA	NA	95%CI	pg/mL	NA	NA	NA	NA	NA	NA	NA	NA	NA
12	Haddad 2018	Intervention	NCT01271829	Supplementary Table 1	Control	NA	PP	Summary	Outcome	Satiety	Ghrelin	Ghrelin .5h	Ghrelin .5h	Blood		NA		26	Mean	pg/ml	NA	NA	NA	NA	NA	95%CI	pg/ml	NA	NA	NA	NA	NA	NA	NA	NA	NA
12	Haddad 2018	Intervention	NCT01271829	Supplementary Table 1	Control	NA	PP	Summary	Outcome	Satiety	Ghrelin	Ghrelin 0h	Ghrelin 0h	Blood	0	weeks	0	26	Mean	pg/ml	NA	NA	NA	NA	NA	95%CI	pg/ml	NA	NA	NA	NA	NA	NA	NA	NA	NA
12	Haddad 2018	Intervention	NCT01271829	Supplementary Table 1	Control	NA	PP	Summary	Outcome	Satiety	Ghrelin	Ghrelin 1h	Ghrelin 1h	Blood		NA		26	Mean	pg/ml	NA	NA	NA	NA	NA	95%CI	pg/ml	NA	NA	NA	NA	NA	NA	NA	NA	NA
12	Haddad 2018	Intervention	NCT01271829	Supplementary Table 1	Control	NA	PP	Summary	Outcome	Satiety	Ghrelin	Ghrelin 2h	Ghrelin 2h	Blood		NA		26	Mean	pg/ml	NA	NA	NA	NA	NA	95%CI	pg/ml	NA	NA	NA	NA	NA	NA	NA	NA	NA
12	Haddad 2018	Intervention	NCT01271829	Supplementary Table 1	Control	NA	PP	Summary	Outcome	Satiety	Ghrelin	Ghrelin 3h	Ghrelin 3h	Blood		NA		26	Mean	pg/ml	NA	NA	NA	NA	NA	95%CI	pg/ml	NA	NA	NA	NA	NA	NA	NA	NA	NA
12	Haddad 2018	Intervention	NCT01271829	Supplementary Table 1	Control	NA	PP	Summary	Outcome	Satiety	GIP	GIP .5h	GIP .5h	Blood		NA		26	Mean	pg/ml	NA	NA	NA	NA	NA	95%CI	pg/ml	NA	NA	NA	NA	NA	NA	NA	NA	NA
12	Haddad 2018	Intervention	NCT01271829	Supplementary Table 1	Control	NA	PP	Summary	Outcome	Satiety	GIP	GIP 0h	GIP 0h	Blood	0	weeks	0	26	Mean	pg/ml	NA	NA	NA	NA	NA	95%CI	pg/ml	NA	NA	NA	NA	NA	NA	NA	NA	NA
12	Haddad 2018	Intervention	NCT01271829	Supplementary Table 1	Control	NA	PP	Summary	Outcome	Satiety	GIP	GIP 1h	GIP 1h	Blood		NA		26	Mean	pg/ml	NA	NA	NA	NA	NA	95%CI	pg/ml	NA	NA	NA	NA	NA	NA	NA	NA	NA
12	Haddad 2018	Intervention	NCT01271829	Supplementary Table 1	Control	NA	PP	Summary	Outcome	Satiety	GIP	GIP 2h	GIP 2h	Blood		NA		26	Mean	pg/ml	NA	NA	NA	NA	NA	95%CI	pg/ml	NA	NA	NA	NA	NA	NA	NA	NA	NA
12	Haddad 2018	Intervention	NCT01271829	Supplementary Table 1	Control	NA	PP	Summary	Outcome	Satiety	GIP	GIP 3h	GIP 3h	Blood		NA		26	Mean	pg/ml	NA	NA	NA	NA	NA	95%CI	pg/ml	NA	NA	NA	NA	NA	NA	NA	NA	NA
12	Haddad 2018	Intervention	NCT01271829	Supplementary Table 1	Control	NA	PP	Summary	Outcome	Satiety	GLP-1	GLP-1 .5h	GLP-1 .5h	Blood		NA		26	Mean	pmol/L	NA	NA	NA	NA	NA	95%CI	pmol/L	NA	NA	NA	NA	NA	NA	NA	NA	NA
12	Haddad 2018	Intervention	NCT01271829	Supplementary Table 1	Control	NA	PP	Summary	Outcome	Satiety	GLP-1	GLP-1 0h	GLP-1 0h	Blood	0	weeks	0	26	Mean	pmol/L	NA	NA	NA	NA	NA	95%CI	pmol/L	NA	NA	NA	NA	NA	NA	NA	NA	NA
12	Haddad 2018	Intervention	NCT01271829	Supplementary Table 1	Control	NA	PP	Summary	Outcome	Satiety	GLP-1	GLP-1 1h	GLP-1 1h	Blood		NA		26	Mean	pmol/L	NA	NA	NA	NA	NA	95%CI	pmol/L	NA	NA	NA	NA	NA	NA	NA	NA	NA
12	Haddad 2018	Intervention	NCT01271829	Supplementary Table 1	Control	NA	PP	Summary	Outcome	Satiety	GLP-1	GLP-1 2h	GLP-1 2h	Blood		NA		26	Mean	pmol/L	NA	NA	NA	NA	NA	95%CI	pmol/L	NA	NA	NA	NA	NA	NA	NA	NA	NA
12	Haddad 2018	Intervention	NCT01271829	Supplementary Table 1	Control	NA	PP	Summary	Outcome	Satiety	GLP-1	GLP-1 3h	GLP-1 3h	Blood		NA		26	Mean	pmol/L	NA	NA	NA	NA	NA	95%CI	pmol/L	NA	NA	NA	NA	NA	NA	NA	NA	NA
12	Haddad 2018	Intervention	NCT01271829	Supplementary Table 1	Control	NA	PP	Summary	Outcome	Satiety	PYY	PYY .5h	PYY .5h	Blood		NA		26	Mean	ng/L	NA	NA	NA	NA	NA	95%CI	pg/mL	NA	NA	NA	NA	NA	NA	NA	NA	NA
12	Haddad 2018	Intervention	NCT01271829	Supplementary Table 1	Control	NA	PP	Summary	Outcome	Satiety	PYY	PYY 0h	PYY 0h	Blood	0	weeks	0	26	Mean	ng/L	NA	NA	NA	NA	NA	95%CI	pg/mL	NA	NA	NA	NA	NA	NA	NA	NA	NA
12	Haddad 2018	Intervention	NCT01271829	Supplementary Table 1	Control	NA	PP	Summary	Outcome	Satiety	PYY	PYY 1h	PYY 1h	Blood		NA		26	Mean	ng/L	NA	NA	NA	NA	NA	95%CI	pg/mL	NA	NA	NA	NA	NA	NA	NA	NA	NA
12	Haddad 2018	Intervention	NCT01271829	Supplementary Table 1	Control	NA	PP	Summary	Outcome	Satiety	PYY	PYY 2h	PYY 2h	Blood		NA		26	Mean	ng/L	NA	NA	NA	NA	NA	95%CI	pg/mL	NA	NA	NA	NA	NA	NA	NA	NA	NA
12	Haddad 2018	Intervention	NCT01271829	Supplementary Table 1	Control	NA	PP	Summary	Outcome	Satiety	PYY	PYY 3h	PYY 3h	Blood		NA		26	Mean	ng/L	NA	NA	NA	NA	NA	95%CI	pg/mL	NA	NA	NA	NA	NA	NA	NA	NA	NA
12	Haddad 2018	Intervention	NCT01271829	Supplementary Table 3	Avocado added	NA	PP	Summary	Outcome	Satiety	Desire question	Desire question .5h	Desire question .5h	NA		NA		26	Mean	score	NA	NA	NA	NA	NA	95%CI	score	NA	NA	NA	NA	NA	NA	NA	NA	NA
12	Haddad 2018	Intervention	NCT01271829	Supplementary Table 3	Avocado added	NA	PP	Summary	Outcome	Satiety	Desire question	Desire question 0h	Desire question 0h	NA	0	weeks	0	26	Mean	score	NA	NA	NA	NA	NA	95%CI	score	NA	NA	NA	NA	NA	NA	NA	NA	NA
12	Haddad 2018	Intervention	NCT01271829	Supplementary Table 3	Avocado added	NA	PP	Summary	Outcome	Satiety	Desire question	Desire question 1h	Desire question 1h	NA		NA		26	Mean	score	NA	NA	NA	NA	NA	95%CI	score	NA	NA	NA	NA	NA	NA	NA	NA	NA
12	Haddad 2018	Intervention	NCT01271829	Supplementary Table 3	Avocado added	NA	PP	Summary	Outcome	Satiety	Desire question	Desire question 2h	Desire question 2h	NA		NA		26	Mean	score	NA	NA	NA	NA	NA	95%CI	score	NA	NA	NA	NA	NA	NA	NA	NA	NA
12	Haddad 2018	Intervention	NCT01271829	Supplementary Table 3	Avocado added	NA	PP	Summary	Outcome	Satiety	Desire question	Desire question 3h	Desire question 3h	NA		NA		26	Mean	score	NA	NA	NA	NA	NA	95%CI	score	NA	NA	NA	NA	NA	NA	NA	NA	NA
12	Haddad 2018	Intervention	NCT01271829	Supplementary Table 3	Avocado added	NA	PP	Summary	Outcome	Satiety	Fullness question	Fullness question .5h	Fullness question .5h	NA		NA		26	Mean	score	NA	NA	NA	NA	NA	95%CI	score	NA	NA	NA	NA	NA	NA	NA	NA	NA
12	Haddad 2018	Intervention	NCT01271829	Supplementary Table 3	Avocado added	NA	PP	Summary	Outcome	Satiety	Fullness question	Fullness question 0h	Fullness question 0h	NA	0	weeks	0	26	Mean	score	NA	NA	NA	NA	NA	95%CI	score	NA	NA	NA	NA	NA	NA	NA	NA	NA
12	Haddad 2018	Intervention	NCT01271829	Supplementary Table 3	Avocado added	NA	PP	Summary	Outcome	Satiety	Fullness question	Fullness question 1h	Fullness question 1h	NA		NA		26	Mean	score	NA	NA	NA	NA	NA	95%CI	score	NA	NA	NA	NA	NA	NA	NA	NA	NA
12	Haddad 2018	Intervention	NCT01271829	Supplementary Table 3	Avocado added	NA	PP	Summary	Outcome	Satiety	Fullness question	Fullness question 2h	Fullness question 2h	NA		NA		26	Mean	score	NA	NA	NA	NA	NA	95%CI	score	NA	NA	NA	NA	NA	NA	NA	NA	NA
12	Haddad 2018	Intervention	NCT01271829	Supplementary Table 3	Avocado added	NA	PP	Summary	Outcome	Satiety	Fullness question	Fullness question 3h	Fullness question 3h	NA		NA		26	Mean	score	NA	NA	NA	NA	NA	95%CI	score	NA	NA	NA	NA	NA	NA	NA	NA	NA
12	Haddad 2018	Intervention	NCT01271829	Supplementary Table 3	Avocado added	NA	PP	Summary	Outcome	Satiety	Intake question	Intake question .5h	Intake question .5h	NA		NA		26	Mean	score	NA	NA	NA	NA	NA	95%CI	score	NA	NA	NA	NA	NA	NA	NA	NA	NA
12	Haddad 2018	Intervention	NCT01271829	Supplementary Table 3	Avocado added	NA	PP	Summary	Outcome	Satiety	Intake question	Intake question 0h	Intake question 0h	NA	0	weeks	0	26	Mean	score	NA	NA	NA	NA	NA	95%CI	score	NA	NA	NA	NA	NA	NA	NA	NA	NA
12	Haddad 2018	Intervention	NCT01271829	Supplementary Table 3	Avocado added	NA	PP	Summary	Outcome	Satiety	Intake question	Intake question 1h	Intake question 1h	NA		NA		26	Mean	score	NA	NA	NA	NA	NA	95%CI	score	NA	NA	NA	NA	NA	NA	NA	NA	NA
12	Haddad 2018	Intervention	NCT01271829	Supplementary Table 3	Avocado added	NA	PP	Summary	Outcome	Satiety	Intake question	Intake question 2h	Intake question 2h	NA		NA		26	Mean	score	NA	NA	NA	NA	NA	95%CI	score	NA	NA	NA	NA	NA	NA	NA	NA	NA
12	Haddad 2018	Intervention	NCT01271829	Supplementary Table 3	Avocado added	NA	PP	Summary	Outcome	Satiety	Intake question	Intake question 3h	Intake question 3h	NA		NA		26	Mean	score	NA	NA	NA	NA	NA	95%CI	score	NA	NA	NA	NA	NA	NA	NA	NA	NA
12	Haddad 2018	Intervention	NCT01271829	Supplementary Table 3	Avocado added	NA	PP	Summary	Outcome	Satiety	Satisfaction question	Satisfaction question .5h	Satisfaction question .5h	NA		NA		26	Mean	score	NA	NA	NA	NA	NA	95%CI	score	NA	NA	NA	NA	NA	NA	NA	NA	NA
12	Haddad 2018	Intervention	NCT01271829	Supplementary Table 3	Avocado added	NA	PP	Summary	Outcome	Satiety	Satisfaction question	Satisfaction question 0h	Satisfaction question 0h	NA	0	weeks	0	26	Mean	score	NA	NA	NA	NA	NA	95%CI	score	NA	NA	NA	NA	NA	NA	NA	NA	NA
12	Haddad 2018	Intervention	NCT01271829	Supplementary Table 3	Avocado added	NA	PP	Summary	Outcome	Satiety	Satisfaction question	Satisfaction question 1h	Satisfaction question 1h	NA		NA		26	Mean	score	NA	NA	NA	NA	NA	95%CI	score	NA	NA	NA	NA	NA	NA	NA	NA	NA
12	Haddad 2018	Intervention	NCT01271829	Supplementary Table 3	Avocado added	NA	PP	Summary	Outcome	Satiety	Satisfaction question	Satisfaction question 2h	Satisfaction question 2h	NA		NA		26	Mean	score	NA	NA	NA	NA	NA	95%CI	score	NA	NA	NA	NA	NA	NA	NA	NA	NA
12	Haddad 2018	Intervention	NCT01271829	Supplementary Table 3	Avocado added	NA	PP	Summary	Outcome	Satiety	Satisfaction question	Satisfaction question 3h	Satisfaction question 3h	NA		NA		26	Mean	score	NA	NA	NA	NA	NA	95%CI	score	NA	NA	NA	NA	NA	NA	NA	NA	NA
12	Haddad 2018	Intervention	NCT01271829	Supplementary Table 3	Avocado inclusive	NA	PP	Summary	Outcome	Satiety	Desire question	Desire question .5h	Desire question .5h	NA		NA		26	Mean	score	NA	NA	NA	NA	NA	95%CI	score	NA	NA	NA	NA	NA	NA	NA	NA	NA
12	Haddad 2018	Intervention	NCT01271829	Supplementary Table 3	Avocado inclusive	NA	PP	Summary	Outcome	Satiety	Desire question	Desire question 0h	Desire question 0h	NA	0	weeks	0	26	Mean	score	NA	NA	NA	NA	NA	95%CI	score	NA	NA	NA	NA	NA	NA	NA	NA	NA
12	Haddad 2018	Intervention	NCT01271829	Supplementary Table 3	Avocado inclusive	NA	PP	Summary	Outcome	Satiety	Desire question	Desire question 1h	Desire question 1h	NA		NA		26	Mean	score	NA	NA	NA	NA	NA	95%CI	score	NA	NA	NA	NA	NA	NA	NA	NA	NA
12	Haddad 2018	Intervention	NCT01271829	Supplementary Table 3	Avocado inclusive	NA	PP	Summary	Outcome	Satiety	Desire question	Desire question 2h	Desire question 2h	NA		NA		26	Mean	score	NA	NA	NA	NA	NA	95%CI	score	NA	NA	NA	NA	NA	NA	NA	NA	NA
12	Haddad 2018	Intervention	NCT01271829	Supplementary Table 3	Avocado inclusive	NA	PP	Summary	Outcome	Satiety	Desire question	Desire question 3h	Desire question 3h	NA		NA		26	Mean	score	NA	NA	NA	NA	NA	95%CI	score	NA	NA	NA	NA	NA	NA	NA	NA	NA
12	Haddad 2018	Intervention	NCT01271829	Supplementary Table 3	Avocado inclusive	NA	PP	Summary	Outcome	Satiety	Fullness question	Fullness question .5h	Fullness question .5h	NA		NA		26	Mean	score	NA	NA	NA	NA	NA	95%CI	score	NA	NA	NA	NA	NA	NA	NA	NA	NA
12	Haddad 2018	Intervention	NCT01271829	Supplementary Table 3	Avocado inclusive	NA	PP	Summary	Outcome	Satiety	Fullness question	Fullness question 0h	Fullness question 0h	NA	0	weeks	0	26	Mean	score	NA	NA	NA	NA	NA	95%CI	score	NA	NA	NA	NA	NA	NA	NA	NA	NA
12	Haddad 2018	Intervention	NCT01271829	Supplementary Table 3	Avocado inclusive	NA	PP	Summary	Outcome	Satiety	Fullness question	Fullness question 1h	Fullness question 1h	NA		NA		26	Mean	score	NA	NA	NA	NA	NA	95%CI	score	NA	NA	NA	NA	NA	NA	NA	NA	NA
12	Haddad 2018	Intervention	NCT01271829	Supplementary Table 3	Avocado inclusive	NA	PP	Summary	Outcome	Satiety	Fullness question	Fullness question 2h	Fullness question 2h	NA		NA		26	Mean	score	NA	NA	NA	NA	NA	95%CI	score	NA	NA	NA	NA	NA	NA	NA	NA	NA
12	Haddad 2018	Intervention	NCT01271829	Supplementary Table 3	Avocado inclusive	NA	PP	Summary	Outcome	Satiety	Fullness question	Fullness question 3h	Fullness question 3h	NA		NA		26	Mean	score	NA	NA	NA	NA	NA	95%CI	score	NA	NA	NA	NA	NA	NA	NA	NA	NA
12	Haddad 2018	Intervention	NCT01271829	Supplementary Table 3	Avocado inclusive	NA	PP	Summary	Outcome	Satiety	Intake question	Intake question .5h	Intake question .5h	NA		NA		26	Mean	score	NA	NA	NA	NA	NA	95%CI	score	NA	NA	NA	NA	NA	NA	NA	NA	NA
12	Haddad 2018	Intervention	NCT01271829	Supplementary Table 3	Avocado inclusive	NA	PP	Summary	Outcome	Satiety	Intake question	Intake question 0h	Intake question 0h	NA	0	weeks	0	26	Mean	score	NA	NA	NA	NA	NA	95%CI	score	NA	NA	NA	NA	NA	NA	NA	NA	NA
12	Haddad 2018	Intervention	NCT01271829	Supplementary Table 3	Avocado inclusive	NA	PP	Summary	Outcome	Satiety	Intake question	Intake question 1h	Intake question 1h	NA		NA		26	Mean	score	NA	NA	NA	NA	NA	95%CI	score	NA	NA	NA	NA	NA	NA	NA	NA	NA
12	Haddad 2018	Intervention	NCT01271829	Supplementary Table 3	Avocado inclusive	NA	PP	Summary	Outcome	Satiety	Intake question	Intake question 2h	Intake question 2h	NA		NA		26	Mean	score	NA	NA	NA	NA	NA	95%CI	score	NA	NA	NA	NA	NA	NA	NA	NA	NA
12	Haddad 2018	Intervention	NCT01271829	Supplementary Table 3	Avocado inclusive	NA	PP	Summary	Outcome	Satiety	Intake question	Intake question 3h	Intake question 3h	NA		NA		26	Mean	score	NA	NA	NA	NA	NA	95%CI	score	NA	NA	NA	NA	NA	NA	NA	NA	NA
12	Haddad 2018	Intervention	NCT01271829	Supplementary Table 3	Avocado inclusive	NA	PP	Summary	Outcome	Satiety	Satisfaction question	Satisfaction question .5h	Satisfaction question .5h	NA		NA		26	Mean	score	NA	NA	NA	NA	NA	95%CI	score	NA	NA	NA	NA	NA	NA	NA	NA	NA
12	Haddad 2018	Intervention	NCT01271829	Supplementary Table 3	Avocado inclusive	NA	PP	Summary	Outcome	Satiety	Satisfaction question	Satisfaction question 0h	Satisfaction question 0h	NA	0	weeks	0	26	Mean	score	NA	NA	NA	NA	NA	95%CI	score	NA	NA	NA	NA	NA	NA	NA	NA	NA
12	Haddad 2018	Intervention	NCT01271829	Supplementary Table 3	Avocado inclusive	NA	PP	Summary	Outcome	Satiety	Satisfaction question	Satisfaction question 1h	Satisfaction question 1h	NA		NA		26	Mean	score	NA	NA	NA	NA	NA	95%CI	score	NA	NA	NA	NA	NA	NA	NA	NA	NA
12	Haddad 2018	Intervention	NCT01271829	Supplementary Table 3	Avocado inclusive	NA	PP	Summary	Outcome	Satiety	Satisfaction question	Satisfaction question 2h	Satisfaction question 2h	NA		NA		26	Mean	score	NA	NA	NA	NA	NA	95%CI	score	NA	NA	NA	NA	NA	NA	NA	NA	NA
12	Haddad 2018	Intervention	NCT01271829	Supplementary Table 3	Avocado inclusive	NA	PP	Summary	Outcome	Satiety	Satisfaction question	Satisfaction question 3h	Satisfaction question 3h	NA		NA		26	Mean	score	NA	NA	NA	NA	NA	95%CI	score	NA	NA	NA	NA	NA	NA	NA	NA	NA
12	Haddad 2018	Intervention	NCT01271829	Supplementary Table 3	Control	NA	PP	Summary	Outcome	Satiety	Desire question	Desire question .5h	Desire question .5h	NA		NA		26	Mean	score	NA	NA	NA	NA	NA	95%CI	score	NA	NA	NA	NA	NA	NA	NA	NA	NA
12	Haddad 2018	Intervention	NCT01271829	Supplementary Table 3	Control	NA	PP	Summary	Outcome	Satiety	Desire question	Desire question 0h	Desire question 0h	NA	0	weeks	0	26	Mean	score	NA	NA	NA	NA	NA	95%CI	score	NA	NA	NA	NA	NA	NA	NA	NA	NA
12	Haddad 2018	Intervention	NCT01271829	Supplementary Table 3	Control	NA	PP	Summary	Outcome	Satiety	Desire question	Desire question 1h	Desire question 1h	NA		NA		26	Mean	score	NA	NA	NA	NA	NA	95%CI	score	NA	NA	NA	NA	NA	NA	NA	NA	NA
12	Haddad 2018	Intervention	NCT01271829	Supplementary Table 3	Control	NA	PP	Summary	Outcome	Satiety	Desire question	Desire question 2h	Desire question 2h	NA		NA		26	Mean	score	NA	NA	NA	NA	NA	95%CI	score	NA	NA	NA	NA	NA	NA	NA	NA	NA
12	Haddad 2018	Intervention	NCT01271829	Supplementary Table 3	Control	NA	PP	Summary	Outcome	Satiety	Desire question	Desire question 3h	Desire question 3h	NA		NA		26	Mean	score	NA	NA	NA	NA	NA	95%CI	score	NA	NA	NA	NA	NA	NA	NA	NA	NA
12	Haddad 2018	Intervention	NCT01271829	Supplementary Table 3	Control	NA	PP	Summary	Outcome	Satiety	Fullness question	Fullness question .5h	Fullness question .5h	NA		NA		26	Mean	score	NA	NA	NA	NA	NA	95%CI	score	NA	NA	NA	NA	NA	NA	NA	NA	NA
12	Haddad 2018	Intervention	NCT01271829	Supplementary Table 3	Control	NA	PP	Summary	Outcome	Satiety	Fullness question	Fullness question 0h	Fullness question 0h	NA	0	weeks	0	26	Mean	score	NA	NA	NA	NA	NA	95%CI	score	NA	NA	NA	NA	NA	NA	NA	NA	NA
12	Haddad 2018	Intervention	NCT01271829	Supplementary Table 3	Control	NA	PP	Summary	Outcome	Satiety	Fullness question	Fullness question 1h	Fullness question 1h	NA		NA		26	Mean	score	NA	NA	NA	NA	NA	95%CI	score	NA	NA	NA	NA	NA	NA	NA	NA	NA
12	Haddad 2018	Intervention	NCT01271829	Supplementary Table 3	Control	NA	PP	Summary	Outcome	Satiety	Fullness question	Fullness question 2h	Fullness question 2h	NA		NA		26	Mean	score	NA	NA	NA	NA	NA	95%CI	score	NA	NA	NA	NA	NA	NA	NA	NA	NA
12	Haddad 2018	Intervention	NCT01271829	Supplementary Table 3	Control	NA	PP	Summary	Outcome	Satiety	Fullness question	Fullness question 3h	Fullness question 3h	NA		NA		26	Mean	score	NA	NA	NA	NA	NA	95%CI	score	NA	NA	NA	NA	NA	NA	NA	NA	NA
12	Haddad 2018	Intervention	NCT01271829	Supplementary Table 3	Control	NA	PP	Summary	Outcome	Satiety	Intake question	Intake question .5h	Intake question .5h	NA		NA		26	Mean	score	NA	NA	NA	NA	NA	95%CI	score	NA	NA	NA	NA	NA	NA	NA	NA	NA
12	Haddad 2018	Intervention	NCT01271829	Supplementary Table 3	Control	NA	PP	Summary	Outcome	Satiety	Intake question	Intake question 0h	Intake question 0h	NA	0	weeks	0	26	Mean	score	NA	NA	NA	NA	NA	95%CI	score	NA	NA	NA	NA	NA	NA	NA	NA	NA
12	Haddad 2018	Intervention	NCT01271829	Supplementary Table 3	Control	NA	PP	Summary	Outcome	Satiety	Intake question	Intake question 1h	Intake question 1h	NA		NA		26	Mean	score	NA	NA	NA	NA	NA	95%CI	score	NA	NA	NA	NA	NA	NA	NA	NA	NA
12	Haddad 2018	Intervention	NCT01271829	Supplementary Table 3	Control	NA	PP	Summary	Outcome	Satiety	Intake question	Intake question 2h	Intake question 2h	NA		NA		26	Mean	score	NA	NA	NA	NA	NA	95%CI	score	NA	NA	NA	NA	NA	NA	NA	NA	NA
12	Haddad 2018	Intervention	NCT01271829	Supplementary Table 3	Control	NA	PP	Summary	Outcome	Satiety	Intake question	Intake question 3h	Intake question 3h	NA		NA		26	Mean	score	NA	NA	NA	NA	NA	95%CI	score	NA	NA	NA	NA	NA	NA	NA	NA	NA
12	Haddad 2018	Intervention	NCT01271829	Supplementary Table 3	Control	NA	PP	Summary	Outcome	Satiety	Satisfaction question	Satisfaction question .5h	Satisfaction question .5h	NA		NA		26	Mean	score	NA	NA	NA	NA	NA	95%CI	score	NA	NA	NA	NA	NA	NA	NA	NA	NA
12	Haddad 2018	Intervention	NCT01271829	Supplementary Table 3	Control	NA	PP	Summary	Outcome	Satiety	Satisfaction question	Satisfaction question 0h	Satisfaction question 0h	NA	0	weeks	0	26	Mean	score	NA	NA	NA	NA	NA	95%CI	score	NA	NA	NA	NA	NA	NA	NA	NA	NA
12	Haddad 2018	Intervention	NCT01271829	Supplementary Table 3	Control	NA	PP	Summary	Outcome	Satiety	Satisfaction question	Satisfaction question 1h	Satisfaction question 1h	NA		NA		26	Mean	score	NA	NA	NA	NA	NA	95%CI	score	NA	NA	NA	NA	NA	NA	NA	NA	NA
12	Haddad 2018	Intervention	NCT01271829	Supplementary Table 3	Control	NA	PP	Summary	Outcome	Satiety	Satisfaction question	Satisfaction question 2h	Satisfaction question 2h	NA		NA		26	Mean	score	NA	NA	NA	NA	NA	95%CI	score	NA	NA	NA	NA	NA	NA	NA	NA	NA
12	Haddad 2018	Intervention	NCT01271829	Supplementary Table 3	Control	NA	PP	Summary	Outcome	Satiety	Satisfaction question	Satisfaction question 3h	Satisfaction question 3h	NA		NA		26	Mean	score	NA	NA	NA	NA	NA	95%CI	score	NA	NA	NA	NA	NA	NA	NA	NA	NA
12	Haddad 2018	Intervention	NCT01271829	Table 1 header	All	NA	PP	Summary	Dietary	Energy	Energy	Energy	Energy	NA		NA		26	Absolute value	kcal/d	NA	NA	NA	NA	NA	NA	kcal/d	NA	NA	NA	NA	NA	NA	NA	NA	NA
12	Haddad 2018	Intervention	NCT01271829	Table S2	Avocado Added	NA	PP	Summary	Outcome	Satiety	Ghrelin	Ghrelin AUC 3h	Ghrelin AUC 3h	Blood		NA		26	LSM	log pg/ml x min	NA	NA	NA	NA	NA	SD	log pg/ml per min	NA	NA	NA	NA	NA	NA	NA	NA	NA
12	Haddad 2018	Intervention	NCT01271829	Table S2	Avocado Added	NA	PP	Summary	Outcome	Satiety	GIP	GIP AUC 3h	GIP AUC 3h	Blood		NA		26	LSM	log pg/ml x min	NA	NA	NA	NA	NA	SD	log pg/ml per min	NA	NA	NA	NA	NA	NA	NA	NA	NA
12	Haddad 2018	Intervention	NCT01271829	Table S2	Avocado Added	NA	PP	Summary	Outcome	Satiety	GLP-1	GLP-1 AUC 3h	GLP-1 AUC 3h	Blood		NA		26	LSM	log pmol/L x min	NA	NA	NA	NA	NA	SD	log pmol/L per min	NA	NA	NA	NA	NA	NA	NA	NA	NA
12	Haddad 2018	Intervention	NCT01271829	Table S2	Avocado Added	NA	PP	Summary	Outcome	Satiety	PYY	PYY AUC 3h	PYY AUC 3h	Blood		NA		26	LSM	log ng/L x min	NA	NA	NA	NA	NA	SD	log ng/L per hour	NA	NA	NA	NA	NA	NA	NA	NA	NA
12	Haddad 2018	Intervention	NCT01271829	Table S2	Avocado inclusive	NA	PP	Summary	Outcome	Satiety	Ghrelin	Ghrelin AUC 3h	Ghrelin AUC 3h	Blood		NA		26	LSM	log pg/ml x min	NA	NA	NA	NA	NA	SD	log pg/ml per min	NA	NA	NA	NA	NA	NA	NA	NA	NA
12	Haddad 2018	Intervention	NCT01271829	Table S2	Avocado inclusive	NA	PP	Summary	Outcome	Satiety	GIP	GIP AUC 3h	GIP AUC 3h	Blood		NA		26	LSM	log pg/ml x min	NA	NA	NA	NA	NA	SD	log pg/ml per min	NA	NA	NA	NA	NA	NA	NA	NA	NA
12	Haddad 2018	Intervention	NCT01271829	Table S2	Avocado inclusive	NA	PP	Summary	Outcome	Satiety	GLP-1	GLP-1 AUC 3h	GLP-1 AUC 3h	Blood		NA		26	LSM	log pmol/L x min	NA	NA	NA	NA	NA	SD	log pmol/L per min	NA	NA	NA	NA	NA	NA	NA	NA	NA
12	Haddad 2018	Intervention	NCT01271829	Table S2	Avocado inclusive	NA	PP	Summary	Outcome	Satiety	PYY	PYY AUC 3h	PYY AUC 3h	Blood		NA		26	LSM	log ng/L x min	NA	NA	NA	NA	NA	SD	log ng/L per hour	NA	NA	NA	NA	NA	NA	NA	NA	NA
12	Haddad 2018	Intervention	NCT01271829	Table S2	Control	NA	PP	Summary	Outcome	Satiety	Ghrelin	Ghrelin AUC 3h	Ghrelin AUC 3h	Blood		NA		26	LSM	log pg/ml x min	NA	NA	NA	NA	NA	SD	log pg/ml per min	NA	NA	NA	NA	NA	NA	NA	NA	NA
12	Haddad 2018	Intervention	NCT01271829	Table S2	Control	NA	PP	Summary	Outcome	Satiety	GIP	GIP AUC 3h	GIP AUC 3h	Blood		NA		26	LSM	log pg/ml x min	NA	NA	NA	NA	NA	SD	log pg/ml per min	NA	NA	NA	NA	NA	NA	NA	NA	NA
12	Haddad 2018	Intervention	NCT01271829	Table S2	Control	NA	PP	Summary	Outcome	Satiety	GLP-1	GLP-1 AUC 3h	GLP-1 AUC 3h	Blood		NA		26	LSM	log pmol/L x min	NA	NA	NA	NA	NA	SD	log pmol/L per min	NA	NA	NA	NA	NA	NA	NA	NA	NA
12	Haddad 2018	Intervention	NCT01271829	Table S2	Control	NA	PP	Summary	Outcome	Satiety	PYY	PYY AUC 3h	PYY AUC 3h	Blood		NA		26	LSM	log ng/L x min	NA	NA	NA	NA	NA	SD	log ng/L per hour	NA	NA	NA	NA	NA	NA	NA	NA	NA
13	Khor 2014	Intervention	Khor 2014	Figure 1a	Avo	NA	PP	Within	Outcome	Glycemia	Glucose	Glucose	Glucose	Plasma		NA		8	NA	mmol/L, change-in	NA	NA	NA	NA	NA	NA	mg/dl, change-in	NA	NA	NA	NA	NA	NA	NA	NA	NA
13	Khor 2014	Intervention	Khor 2014	Figure 1a	Cream	NA	PP	Within	Outcome	Glycemia	Glucose	Glucose	Glucose	Plasma		NA		10	NA	mmol/L, change-in	NA	NA	NA	NA	NA	NA	mg/dl, change-in	NA	NA	NA	NA	NA	NA	NA	NA	NA
13	Khor 2014	Intervention	Khor 2014	Figure 1a	Ice cream	NA	PP	Within	Outcome	Glycemia	Glucose	Glucose	Glucose	Plasma		NA		10	NA	mmol/L, change-in	NA	NA	NA	NA	NA	NA	mg/dl, change-in	NA	NA	NA	NA	NA	NA	NA	NA	NA
13	Khor 2014	Intervention	Khor 2014	Figure 1a	Sugar	NA	PP	Within	Outcome	Glycemia	Glucose	Glucose	Glucose	Plasma		NA		11	NA	mmol/L, change-in	NA	NA	NA	NA	NA	NA	mg/dl, change-in	NA	NA	NA	NA	NA	NA	NA	NA	NA
13	Khor 2014	Intervention	Khor 2014	Figure 1b	Avo	NA	PP	Within	Outcome	Lipids	Triglycerides	Triglycerides	Triglycerides	Plasma		NA		8	NA	mmol/L, change-in						NA	mg/dl, change-in									NA
13	Khor 2014	Intervention	Khor 2014	Figure 1b	Cream	NA	PP	Within	Outcome	Lipids	Triglycerides	Triglycerides	Triglycerides	Plasma		NA		10	NA	mmol/L, change-in						NA	mg/dl, change-in									NA
13	Khor 2014	Intervention	Khor 2014	Figure 1b	Ice cream	NA	PP	Within	Outcome	Lipids	Triglycerides	Triglycerides	Triglycerides	Plasma		NA		10	NA	mmol/L, change-in						NA	mg/dl, change-in									NA
13	Khor 2014	Intervention	Khor 2014	Figure 1b	Sugar	NA	PP	Within	Outcome	Lipids	Triglycerides	Triglycerides	Triglycerides	Plasma		NA		11	NA	mmol/L, change-in						NA	mg/dl, change-in									NA
13	Khor 2014	Intervention	Khor 2014	Figure 2a	Avo	NA	PP	Within	Outcome	Antioxidation	Malondialdehyde	Malondialdehyde	MDA	Plasma		NA		8	NA	%, change-in	NA	NA	NA	NA	NA	NA	%, change-in	NA	NA	NA	NA	NA	NA	NA	NA	NA
13	Khor 2014	Intervention	Khor 2014	Figure 2a	Cream	NA	PP	Within	Outcome	Antioxidation	Malondialdehyde	Malondialdehyde	MDA	Plasma		NA		10	NA	%, change-in	NA	NA	NA	NA	NA	NA	%, change-in	NA	NA	NA	NA	NA	NA	NA	NA	NA
13	Khor 2014	Intervention	Khor 2014	Figure 2a	Ice cream	NA	PP	Within	Outcome	Antioxidation	Malondialdehyde	Malondialdehyde	MDA	Plasma		NA		10	NA	%, change-in	NA	NA	NA	NA	NA	NA	%, change-in	NA	NA	NA	NA	NA	NA	NA	NA	NA
13	Khor 2014	Intervention	Khor 2014	Figure 2a	Sugar	NA	PP	Within	Outcome	Antioxidation	Malondialdehyde	Malondialdehyde	MDA	Plasma		NA		11	NA	%, change-in	NA	NA	NA	NA	NA	NA	%, change-in	NA	NA	NA	NA	NA	NA	NA	NA	NA
13	Khor 2014	Intervention	Khor 2014	Figure 2b	Avo	NA	PP	Within	Outcome	Antioxidation	Antioxidant capacity	Antioxidant capacity	Antioxidant capacity	Plasma		NA		8	NA	%, change-in	NA	NA	NA	NA	NA	NA	%, change-in	NA	NA	NA	NA	NA	NA	NA	NA	NA
13	Khor 2014	Intervention	Khor 2014	Figure 2b	Cream	NA	PP	Within	Outcome	Antioxidation	Antioxidant capacity	Antioxidant capacity	Antioxidant capacity	Plasma		NA		10	NA	%, change-in	NA	NA	NA	NA	NA	NA	%, change-in	NA	NA	NA	NA	NA	NA	NA	NA	NA
13	Khor 2014	Intervention	Khor 2014	Figure 2b	Ice cream	NA	PP	Within	Outcome	Antioxidation	Antioxidant capacity	Antioxidant capacity	Antioxidant capacity	Plasma		NA		10	NA	%, change-in	NA	NA	NA	NA	NA	NA	%, change-in	NA	NA	NA	NA	NA	NA	NA	NA	NA
13	Khor 2014	Intervention	Khor 2014	Figure 2b	Sugar	NA	PP	Within	Outcome	Antioxidation	Antioxidant capacity	Antioxidant capacity	Antioxidant capacity	Plasma		NA		11	NA	%, change-in	NA	NA	NA	NA	NA	NA	%, change-in	NA	NA	NA	NA	NA	NA	NA	NA	NA
13	Khor 2014	Intervention	Khor 2014	Methods section	All	Female	ITT	Summary	Subject Characteristics	Age	Age	Age	Age	NA		NA		6	Mean	years	45.2	5.8	14.2	31	59.4	SD	years	45.2	45	45	40	5.79713	14.2	31	59.4	NA
13	Khor 2014	Intervention	Khor 2014	Methods section	All	Male	ITT	Summary	Subject Characteristics	Age	Age	Age	Age	NA		NA		5	Mean	years	62.4	5.63	12.6	49.8	75	SD	years	62.4	62	60	60	5.63489	12.6	49.8	75	NA
13	Khor 2014	Intervention	Khor 2014	Methods section	All	NA	ITT	Summary	Subject Characteristics	Sex	Sex	Female	Female	NA		NA		11	Count	Count	6					NA	Count	6	6	5	0					NA
13	Khor 2014	Intervention	Khor 2014	Methods section	All	NA	ITT	Summary	Subject Characteristics	Sex	Sex	Female	Female	NA		NA		11	Percentage	%	54.5455					NA	%	54.5455	54	50	50					NA
13	Khor 2014	Intervention	Khor 2014	Methods section	All	NA	ITT	Summary	Subject Characteristics	Sex	Sex	Male	Male	NA		NA		11	Count	Count	5					NA	Count	5	5	5	0					NA
13	Khor 2014	Intervention	Khor 2014	Methods section	All	NA	ITT	Summary	Subject Characteristics	Sex	Sex	Male	Male	NA		NA		11	Percentage	%	45.4545					NA	%	45.4545	45	45	40					NA
13	Khor 2014	Intervention	Khor 2014	Methods section;Table1	Avo	NA	Planned	Summary	Dietary	Avocado intake	Avocado intake	Avocado intake	Avocado intake	NA		NA		11	Absolute value	g per test meal	489					NA	g/test meal	489	489	485	480					NA
13	Khor 2014	Intervention	Khor 2014	Methods section;Table1	Cream	NA	Planned	Summary	Dietary	Avocado intake	Avocado intake	Avocado intake	Avocado intake	NA		NA		11	Absolute value	g per test meal	0					NA	g/test meal	0	0	0	0					NA
13	Khor 2014	Intervention	Khor 2014	Methods section;Table1	Ice cream	NA	Planned	Summary	Dietary	Avocado intake	Avocado intake	Avocado intake	Avocado intake	NA		NA		11	Absolute value	g per test meal	0					NA	g/test meal	0	0	0	0					NA
13	Khor 2014	Intervention	Khor 2014	Methods section;Table1	Sugar	NA	Planned	Summary	Dietary	Avocado intake	Avocado intake	Avocado intake	Avocado intake	NA		NA		11	Absolute value	g per test meal	0					NA	g/test meal	0	0	0	0					NA
13	Khor 2014	Intervention	Khor 2014	Table 2	Avo	NA	PP	Summary	Subject Characteristics	Antioxidation	Antioxidant capacity	Antioxidant capacity	Antioxidant capacity	NA		NA		8	Mean	nmol/mg	NA	NA	NA	NA	NA	SD	nmol/mg	NA	NA	NA	NA	NA	NA	NA	NA	NA
13	Khor 2014	Intervention	Khor 2014	Table 2	Avo	NA	PP	Summary	Subject Characteristics	Immune	CD11b	CD11b monocytes	CD11b monocytes	NA		NA		8	Mean	MFI	NA	NA	NA	NA	NA	SD	MFI	NA	NA	NA	NA	NA	NA	NA	NA	NA
13	Khor 2014	Intervention	Khor 2014	Table 2	Avo	NA	PP	Summary	Subject Characteristics	Immune	CD11b	CD11b neurophils	CD11b neurophils	NA		NA		8	Mean	MFI	NA	NA	NA	NA	NA	SD	MFI	NA	NA	NA	NA	NA	NA	NA	NA	NA
13	Khor 2014	Intervention	Khor 2014	Table 2	Avo	NA	PP	Summary	Subject Characteristics	Immune	CD66b	CD66b	CD66b	NA		NA		8	Mean	MFI	NA	NA	NA	NA	NA	SD	MFI	NA	NA	NA	NA	NA	NA	NA	NA	NA
13	Khor 2014	Intervention	Khor 2014	Table 2	Avo	NA	PP	Summary	Subject Characteristics	Metabolic	Glucose	Glucose	Glucose	NA		NA		8	Mean	mmol/L	NA	NA	NA	NA	NA	SD	mg/dL	NA	NA	NA	NA	NA	NA	NA	NA	NA
13	Khor 2014	Intervention	Khor 2014	Table 2	Avo	NA	PP	Summary	Subject Characteristics	Immune	IL-6	IL-6	IL-6	Blood		NA		8	Mean	pg/mL	NA	NA	NA	NA	NA	SD	pg/mL	NA	NA	NA	NA	NA	NA	NA	NA	NA
13	Khor 2014	Intervention	Khor 2014	Table 2	Avo	NA	PP	Summary	Subject Characteristics	Antioxidation	Malondialdehyde	Malondialdehyde	MDA	NA		NA		8	Mean	umol/L	NA	NA	NA	NA	NA	SD	μmol/L	NA	NA	NA	NA	NA	NA	NA	NA	NA
13	Khor 2014	Intervention	Khor 2014	Table 2	Avo	NA	PP	Summary	Subject Characteristics	Antioxidation	Protein carbonyls	Protein carbonyls	Protein carbonyls	NA		NA		8	Mean	nmol/mg	NA	NA	NA	NA	NA	SD	nmol/mg	NA	NA	NA	NA	NA	NA	NA	NA	NA
13	Khor 2014	Intervention	Khor 2014	Table 2	Avo	NA	PP	Summary	Subject Characteristics	Lipids	Total cholesterol	Total cholesterol	Cholesterol	NA		NA		8	Mean	mmol/L	4.85	0.3	0.85	4	5.7	SD	mg/dL	187.549	187	185	180	11.6211	32.8695	154.68	220.419	NA
13	Khor 2014	Intervention	Khor 2014	Table 2	Avo	NA	PP	Summary	Subject Characteristics	Lipids	Triglycerides	Triglycerides	Triglycerides	NA		NA		8	Mean	mmol/L	1.37	0.27	0.77	0.6	2.14	SD	mg/dL	121.341	121	120	120	24.112	68.1989	53.142	189.54	NA
13	Khor 2014	Intervention	Khor 2014	Table 2	Cream	NA	PP	Summary	Subject Characteristics	Antioxidation	Antioxidant capacity	Antioxidant capacity	Antioxidant capacity	NA		NA		10	Mean	nmol/mg	NA	NA	NA	NA	NA	SD	nmol/mg	NA	NA	NA	NA	NA	NA	NA	NA	NA
13	Khor 2014	Intervention	Khor 2014	Table 2	Cream	NA	PP	Summary	Subject Characteristics	Immune	CD11b	CD11b monocytes	CD11b monocytes	NA		NA		10	Mean	MFI	NA	NA	NA	NA	NA	SD	MFI	NA	NA	NA	NA	NA	NA	NA	NA	NA
13	Khor 2014	Intervention	Khor 2014	Table 2	Cream	NA	PP	Summary	Subject Characteristics	Immune	CD11b	CD11b neurophils	CD11b neurophils	NA		NA		10	Mean	MFI	NA	NA	NA	NA	NA	SD	MFI	NA	NA	NA	NA	NA	NA	NA	NA	NA
13	Khor 2014	Intervention	Khor 2014	Table 2	Cream	NA	PP	Summary	Subject Characteristics	Immune	CD66b	CD66b	CD66b	NA		NA		10	Mean	MFI	NA	NA	NA	NA	NA	SD	MFI	NA	NA	NA	NA	NA	NA	NA	NA	NA
13	Khor 2014	Intervention	Khor 2014	Table 2	Cream	NA	PP	Summary	Subject Characteristics	Metabolic	Glucose	Glucose	Glucose	NA		NA		10	Mean	mmol/L	NA	NA	NA	NA	NA	SD	mg/dL	NA	NA	NA	NA	NA	NA	NA	NA	NA
13	Khor 2014	Intervention	Khor 2014	Table 2	Cream	NA	PP	Summary	Subject Characteristics	Immune	IL-6	IL-6	IL-6	Blood		NA		10	Mean	pg/mL	NA	NA	NA	NA	NA	SD	pg/mL	NA	NA	NA	NA	NA	NA	NA	NA	NA
13	Khor 2014	Intervention	Khor 2014	Table 2	Cream	NA	PP	Summary	Subject Characteristics	Antioxidation	Malondialdehyde	Malondialdehyde	MDA	NA		NA		10	Mean	umol/L	NA	NA	NA	NA	NA	SD	μmol/L	NA	NA	NA	NA	NA	NA	NA	NA	NA
13	Khor 2014	Intervention	Khor 2014	Table 2	Cream	NA	PP	Summary	Subject Characteristics	Antioxidation	Protein carbonyls	Protein carbonyls	Protein carbonyls	NA		NA		10	Mean	nmol/mg	NA	NA	NA	NA	NA	SD	nmol/mg	NA	NA	NA	NA	NA	NA	NA	NA	NA
13	Khor 2014	Intervention	Khor 2014	Table 2	Cream	NA	PP	Summary	Subject Characteristics	Lipids	Total cholesterol	Total cholesterol	Cholesterol	NA		NA		10	Mean	mmol/L	5.39	0.25	0.8	4.59	6.19	SD	mg/dL	208.431	208	205	200	9.78282	30.936	177.495	239.367	NA
13	Khor 2014	Intervention	Khor 2014	Table 2	Cream	NA	PP	Summary	Subject Characteristics	Lipids	Triglycerides	Triglycerides	Triglycerides	NA		NA		10	Mean	mmol/L	1.4	0.23	0.73	0.67	2.13	SD	mg/dL	123.998	123	120	120	20.4461	64.6561	59.3419	188.654	NA
13	Khor 2014	Intervention	Khor 2014	Table 2	Ice cream	NA	PP	Summary	Subject Characteristics	Antioxidation	Antioxidant capacity	Antioxidant capacity	Antioxidant capacity	NA		NA		10	Mean	nmol/mg	NA	NA	NA	NA	NA	SD	nmol/mg	NA	NA	NA	NA	NA	NA	NA	NA	NA
13	Khor 2014	Intervention	Khor 2014	Table 2	Ice cream	NA	PP	Summary	Subject Characteristics	Immune	CD11b	CD11b monocytes	CD11b monocytes	NA		NA		10	Mean	MFI	NA	NA	NA	NA	NA	SD	MFI	NA	NA	NA	NA	NA	NA	NA	NA	NA
13	Khor 2014	Intervention	Khor 2014	Table 2	Ice cream	NA	PP	Summary	Subject Characteristics	Immune	CD11b	CD11b neurophils	CD11b neurophils	NA		NA		10	Mean	MFI	NA	NA	NA	NA	NA	SD	MFI	NA	NA	NA	NA	NA	NA	NA	NA	NA
13	Khor 2014	Intervention	Khor 2014	Table 2	Ice cream	NA	PP	Summary	Subject Characteristics	Immune	CD66b	CD66b	CD66b	NA		NA		10	Mean	MFI	NA	NA	NA	NA	NA	SD	MFI	NA	NA	NA	NA	NA	NA	NA	NA	NA
13	Khor 2014	Intervention	Khor 2014	Table 2	Ice cream	NA	PP	Summary	Subject Characteristics	Metabolic	Glucose	Glucose	Glucose	NA		NA		10	Mean	mmol/L	NA	NA	NA	NA	NA	SD	mg/dL	NA	NA	NA	NA	NA	NA	NA	NA	NA
13	Khor 2014	Intervention	Khor 2014	Table 2	Ice cream	NA	PP	Summary	Subject Characteristics	Immune	IL-6	IL-6	IL-6	Blood		NA		10	Mean	pg/mL	NA	NA	NA	NA	NA	SD	pg/mL	NA	NA	NA	NA	NA	NA	NA	NA	NA
13	Khor 2014	Intervention	Khor 2014	Table 2	Ice cream	NA	PP	Summary	Subject Characteristics	Antioxidation	Malondialdehyde	Malondialdehyde	MDA	NA		NA		10	Mean	umol/L	NA	NA	NA	NA	NA	SD	μmol/L	NA	NA	NA	NA	NA	NA	NA	NA	NA
13	Khor 2014	Intervention	Khor 2014	Table 2	Ice cream	NA	PP	Summary	Subject Characteristics	Antioxidation	Protein carbonyls	Protein carbonyls	Protein carbonyls	NA		NA		10	Mean	nmol/mg	NA	NA	NA	NA	NA	SD	nmol/mg	NA	NA	NA	NA	NA	NA	NA	NA	NA
13	Khor 2014	Intervention	Khor 2014	Table 2	Ice cream	NA	PP	Summary	Subject Characteristics	Lipids	Total cholesterol	Total cholesterol	Cholesterol	NA		NA		10	Mean	mmol/L	5.29	0.28	0.9	4.39	6.19	SD	mg/dL	204.564	204	200	200	11.0057	34.803	169.761	239.367	NA
13	Khor 2014	Intervention	Khor 2014	Table 2	Ice cream	NA	PP	Summary	Subject Characteristics	Lipids	Triglycerides	Triglycerides	Triglycerides	NA		NA		10	Mean	mmol/L	1.33	0.22	0.7	0.63	2.03	SD	mg/dL	117.798	117	115	110	19.6058	61.999	55.7991	179.797	NA
13	Khor 2014	Intervention	Khor 2014	Table 2	Sugar	NA	ITT	Summary	Subject Characteristics	Antioxidation	Antioxidant capacity	Antioxidant capacity	Antioxidant capacity	NA		NA		11	Mean	nmol/mg	NA	NA	NA	NA	NA	SD	nmol/mg	NA	NA	NA	NA	NA	NA	NA	NA	NA
13	Khor 2014	Intervention	Khor 2014	Table 2	Sugar	NA	ITT	Summary	Subject Characteristics	Immune	CD11b	CD11b monocytes	CD11b monocytes	NA		NA		11	Mean	MFI	NA	NA	NA	NA	NA	SD	MFI	NA	NA	NA	NA	NA	NA	NA	NA	NA
13	Khor 2014	Intervention	Khor 2014	Table 2	Sugar	NA	ITT	Summary	Subject Characteristics	Immune	CD11b	CD11b neurophils	CD11b neurophils	NA		NA		11	Mean	MFI	NA	NA	NA	NA	NA	SD	MFI	NA	NA	NA	NA	NA	NA	NA	NA	NA
13	Khor 2014	Intervention	Khor 2014	Table 2	Sugar	NA	ITT	Summary	Subject Characteristics	Immune	CD66b	CD66b	CD66b	NA		NA		11	Mean	MFI	NA	NA	NA	NA	NA	SD	MFI	NA	NA	NA	NA	NA	NA	NA	NA	NA
13	Khor 2014	Intervention	Khor 2014	Table 2	Sugar	NA	ITT	Summary	Subject Characteristics	Metabolic	Glucose	Glucose	Glucose	NA		NA		11	Mean	mmol/L	NA	NA	NA	NA	NA	SD	mg/dL	NA	NA	NA	NA	NA	NA	NA	NA	NA
13	Khor 2014	Intervention	Khor 2014	Table 2	Sugar	NA	ITT	Summary	Subject Characteristics	Immune	IL-6	IL-6	IL-6	Blood		NA		11	Mean	pg/mL	NA	NA	NA	NA	NA	SD	pg/mL	NA	NA	NA	NA	NA	NA	NA	NA	NA
13	Khor 2014	Intervention	Khor 2014	Table 2	Sugar	NA	ITT	Summary	Subject Characteristics	Antioxidation	Malondialdehyde	Malondialdehyde	MDA	NA		NA		11	Mean	umol/L	NA	NA	NA	NA	NA	SD	μmol/L	NA	NA	NA	NA	NA	NA	NA	NA	NA
13	Khor 2014	Intervention	Khor 2014	Table 2	Sugar	NA	ITT	Summary	Subject Characteristics	Antioxidation	Protein carbonyls	Protein carbonyls	Protein carbonyls	NA		NA		11	Mean	nmol/mg	NA	NA	NA	NA	NA	SD	nmol/mg	NA	NA	NA	NA	NA	NA	NA	NA	NA
13	Khor 2014	Intervention	Khor 2014	Table 2	Sugar	NA	ITT	Summary	Subject Characteristics	Lipids	Total cholesterol	Total cholesterol	Cholesterol	NA		NA		11	Mean	mmol/L	5.22	0.32	1.06	4.16	6.28	SD	mg/dL	201.857	201	200	200	12.359	40.9902	160.867	242.848	NA
13	Khor 2014	Intervention	Khor 2014	Table 2	Sugar	NA	ITT	Summary	Subject Characteristics	Lipids	Triglycerides	Triglycerides	Triglycerides	NA		NA		11	Mean	mmol/L	1.13	0.18	0.6	0.53	1.73	SD	mg/dL	100.084	100	100	100	16.0229	53.142	46.9421	153.226	NA
13	Khor 2014	Intervention	Khor 2014	Table 3	Avo	NA	PP	Summary	Outcome	Immune	CD11b	CD11b monocytes 0h	CD11b monocytes	Blood	0	weeks	0	9	Mean	MFI	NA	NA	NA	NA	NA	SD	MFI	NA	NA	NA	NA	NA	NA	NA	NA	NA
13	Khor 2014	Intervention	Khor 2014	Table 3	Avo	NA	PP	Summary	Outcome	Immune	CD11b	CD11b monocytes 4h	CD11b monocytes	Blood		NA		9	Mean	MFI	NA	NA	NA	NA	NA	SD	MFI	NA	NA	NA	NA	NA	NA	NA	NA	NA
13	Khor 2014	Intervention	Khor 2014	Table 3	Avo	NA	PP	Summary	Outcome	Immune	CD11b	CD11b neurophils 0h	CD11b neurophils	Blood	0	weeks	0	9	Mean	MFI	NA	NA	NA	NA	NA	SD	MFI	NA	NA	NA	NA	NA	NA	NA	NA	NA
13	Khor 2014	Intervention	Khor 2014	Table 3	Avo	NA	PP	Summary	Outcome	Immune	CD11b	CD11b neurophils 4h	CD11b neurophils	Blood		NA		9	Mean	MFI	NA	NA	NA	NA	NA	SD	MFI	NA	NA	NA	NA	NA	NA	NA	NA	NA
13	Khor 2014	Intervention	Khor 2014	Table 3	Avo	NA	PP	Summary	Outcome	Immune	CD66b	CD66b 0h	CD66b	Blood	0	weeks	0	9	Mean	MFI	NA	NA	NA	NA	NA	SD	MFI	NA	NA	NA	NA	NA	NA	NA	NA	NA
13	Khor 2014	Intervention	Khor 2014	Table 3	Avo	NA	PP	Summary	Outcome	Immune	CD66b	CD66b 4h	CD66b	Blood		NA		9	Mean	MFI	NA	NA	NA	NA	NA	SD	MFI	NA	NA	NA	NA	NA	NA	NA	NA	NA
13	Khor 2014	Intervention	Khor 2014	Table 3	Cream	NA	PP	Summary	Outcome	Immune	CD11b	CD11b monocytes 0h	CD11b monocytes	Blood	0	weeks	0	9	Mean	MFI	NA	NA	NA	NA	NA	SD	MFI	NA	NA	NA	NA	NA	NA	NA	NA	NA
13	Khor 2014	Intervention	Khor 2014	Table 3	Cream	NA	PP	Summary	Outcome	Immune	CD11b	CD11b monocytes 4h	CD11b monocytes	Blood		NA		9	Mean	MFI	NA	NA	NA	NA	NA	SD	MFI	NA	NA	NA	NA	NA	NA	NA	NA	NA
13	Khor 2014	Intervention	Khor 2014	Table 3	Cream	NA	PP	Summary	Outcome	Immune	CD11b	CD11b neurophils 0h	CD11b neurophils	Blood	0	weeks	0	9	Mean	MFI	NA	NA	NA	NA	NA	SD	MFI	NA	NA	NA	NA	NA	NA	NA	NA	NA
13	Khor 2014	Intervention	Khor 2014	Table 3	Cream	NA	PP	Summary	Outcome	Immune	CD11b	CD11b neurophils 4h	CD11b neurophils	Blood		NA		9	Mean	MFI	NA	NA	NA	NA	NA	SD	MFI	NA	NA	NA	NA	NA	NA	NA	NA	NA
13	Khor 2014	Intervention	Khor 2014	Table 3	Cream	NA	PP	Summary	Outcome	Immune	CD66b	CD66b 0h	CD66b	Blood	0	weeks	0	9	Mean	MFI	NA	NA	NA	NA	NA	SD	MFI	NA	NA	NA	NA	NA	NA	NA	NA	NA
13	Khor 2014	Intervention	Khor 2014	Table 3	Cream	NA	PP	Summary	Outcome	Immune	CD66b	CD66b 4h	CD66b	Blood		NA		9	Mean	MFI	NA	NA	NA	NA	NA	SD	MFI	NA	NA	NA	NA	NA	NA	NA	NA	NA
13	Khor 2014	Intervention	Khor 2014	Table 3	Ice cream	NA	PP	Summary	Outcome	Immune	CD11b	CD11b monocytes 0h	CD11b monocytes	Blood	0	weeks	0	7	Mean	MFI	NA	NA	NA	NA	NA	SD	MFI	NA	NA	NA	NA	NA	NA	NA	NA	NA
13	Khor 2014	Intervention	Khor 2014	Table 3	Ice cream	NA	PP	Summary	Outcome	Immune	CD11b	CD11b monocytes 4h	CD11b monocytes	Blood		NA		7	Mean	MFI	NA	NA	NA	NA	NA	SD	MFI	NA	NA	NA	NA	NA	NA	NA	NA	NA
13	Khor 2014	Intervention	Khor 2014	Table 3	Ice cream	NA	PP	Summary	Outcome	Immune	CD11b	CD11b neurophils 0h	CD11b neurophils	Blood	0	weeks	0	7	Mean	MFI	NA	NA	NA	NA	NA	SD	MFI	NA	NA	NA	NA	NA	NA	NA	NA	NA
13	Khor 2014	Intervention	Khor 2014	Table 3	Ice cream	NA	PP	Summary	Outcome	Immune	CD11b	CD11b neurophils 4h	CD11b neurophils	Blood		NA		7	Mean	MFI	NA	NA	NA	NA	NA	SD	MFI	NA	NA	NA	NA	NA	NA	NA	NA	NA
13	Khor 2014	Intervention	Khor 2014	Table 3	Ice cream	NA	PP	Summary	Outcome	Immune	CD66b	CD66b 0h	CD66b	Blood	0	weeks	0	7	Mean	MFI	NA	NA	NA	NA	NA	SD	MFI	NA	NA	NA	NA	NA	NA	NA	NA	NA
13	Khor 2014	Intervention	Khor 2014	Table 3	Ice cream	NA	PP	Summary	Outcome	Immune	CD66b	CD66b 4h	CD66b	Blood		NA		7	Mean	MFI	NA	NA	NA	NA	NA	SD	MFI	NA	NA	NA	NA	NA	NA	NA	NA	NA
13	Khor 2014	Intervention	Khor 2014	Table 3	Sugar	NA	PP	Summary	Outcome	Immune	CD11b	CD11b monocytes 0h	CD11b monocytes	Blood	0	weeks	0	9	Mean	MFI	NA	NA	NA	NA	NA	SD	MFI	NA	NA	NA	NA	NA	NA	NA	NA	NA
13	Khor 2014	Intervention	Khor 2014	Table 3	Sugar	NA	PP	Summary	Outcome	Immune	CD11b	CD11b monocytes 4h	CD11b monocytes	Blood		NA		9	Mean	MFI	NA	NA	NA	NA	NA	SD	MFI	NA	NA	NA	NA	NA	NA	NA	NA	NA
13	Khor 2014	Intervention	Khor 2014	Table 3	Sugar	NA	PP	Summary	Outcome	Immune	CD11b	CD11b neurophils 0h	CD11b neurophils	Blood	0	weeks	0	9	Mean	MFI	NA	NA	NA	NA	NA	SD	MFI	NA	NA	NA	NA	NA	NA	NA	NA	NA
13	Khor 2014	Intervention	Khor 2014	Table 3	Sugar	NA	PP	Summary	Outcome	Immune	CD11b	CD11b neurophils 4h	CD11b neurophils	Blood		NA		9	Mean	MFI	NA	NA	NA	NA	NA	SD	MFI	NA	NA	NA	NA	NA	NA	NA	NA	NA
13	Khor 2014	Intervention	Khor 2014	Table 3	Sugar	NA	PP	Summary	Outcome	Immune	CD66b	CD66b 0h	CD66b	Blood	0	weeks	0	9	Mean	MFI	NA	NA	NA	NA	NA	SD	MFI	NA	NA	NA	NA	NA	NA	NA	NA	NA
13	Khor 2014	Intervention	Khor 2014	Table 3	Sugar	NA	PP	Summary	Outcome	Immune	CD66b	CD66b 4h	CD66b	Blood		NA		9	Mean	MFI	NA	NA	NA	NA	NA	SD	MFI	NA	NA	NA	NA	NA	NA	NA	NA	NA
13	Khor 2014	Intervention	Khor 2014	Table 4	Avo	NA	PP	Summary	Outcome	Antioxidation	Antioxidant capacity	Antioxidant capacity AUC 4h	Antioxidant capacity AUC 4hrs	Blood		NA		7	Mean	nmol/mg protein.h	NA	NA	NA	NA	NA	SD	nmol/mg protein per h	NA	NA	NA	NA	NA	NA	NA	NA	NA
13	Khor 2014	Intervention	Khor 2014	Table 4	Avo	NA	PP	Summary	Outcome	Immune	CD66b	CD66b AUC 4h	CD66b AUC 4hrs	Blood		NA		7	Mean	MFI.h	NA	NA	NA	NA	NA	SD	MFI per h	NA	NA	NA	NA	NA	NA	NA	NA	NA
13	Khor 2014	Intervention	Khor 2014	Table 4	Avo	NA	PP	Summary	Outcome	Glycemia	Glucose	Glucose AUC 4h	Glucose AUC 4hrs	Blood		NA		7	Mean	mmol/L.h	NA	NA	NA	NA	NA	SD	mg/dL per h	NA	NA	NA	NA	NA	NA	NA	NA	NA
13	Khor 2014	Intervention	Khor 2014	Table 4	Avo	NA	PP	Summary	Outcome	Immune	IL-6	IL-6 AUC 4h	IL-6 AUC 4hrs	Blood		NA		7	Mean	pg/ml.h	NA	NA	NA	NA	NA	SD	pg/ml per h	NA	NA	NA	NA	NA	NA	NA	NA	NA
13	Khor 2014	Intervention	Khor 2014	Table 4	Avo	NA	PP	Summary	Outcome	Antioxidation	Malondialdehyde	Malondialdehyde AUC 4h	MDA AUC 4hrs	Blood		NA		7	Mean	umol/L.h	NA	NA	NA	NA	NA	SD	μmol/L per h	NA	NA	NA	NA	NA	NA	NA	NA	NA
13	Khor 2014	Intervention	Khor 2014	Table 4	Avo	NA	PP	Summary	Outcome	Antioxidation	Protein carbonyls	Protein carbonyls AUC 4h	Protein carbonyls AUC 4hrs	Blood		NA		7	Mean	nmol/mg protein.h	NA	NA	NA	NA	NA	SD	nmol/mg protein per h	NA	NA	NA	NA	NA	NA	NA	NA	NA
13	Khor 2014	Intervention	Khor 2014	Table 4	Avo	NA	PP	Summary	Outcome	Lipids	Total cholesterol	Cholesterol AUC 4h	Cholesterol AUC 4hrs	Blood		NA		7	Mean	mmol/L.h	408.6	6.16	16.3	392.3	424.9	SD	mmol/L per h	408.6	408	405	400	6.16082	16.3	392.3	424.9	NA
13	Khor 2014	Intervention	Khor 2014	Table 4	Avo	NA	PP	Summary	Outcome	Lipids	Triglycerides	Triglycerides AUC 4h	Triglycerides AUC 4hrs	Blood		NA		7	Mean	mmol/L.h	546.2	37.04	98	448.2	644.2	SD	mmol/L per h	546.2	546	545	540	37.0405	98	448.2	644.2	NA
13	Khor 2014	Intervention	Khor 2014	Table 4	Cream	NA	PP	Summary	Outcome	Antioxidation	Antioxidant capacity	Antioxidant capacity AUC 4h	Antioxidant capacity AUC 4hrs	Blood		NA		7	Mean	nmol/mg protein.h	NA	NA	NA	NA	NA	SD	nmol/mg protein per h	NA	NA	NA	NA	NA	NA	NA	NA	NA
13	Khor 2014	Intervention	Khor 2014	Table 4	Cream	NA	PP	Summary	Outcome	Immune	CD66b	CD66b AUC 4h	CD66b AUC 4hrs	Blood		NA		7	Mean	MFI.h	NA	NA	NA	NA	NA	SD	MFI per h	NA	NA	NA	NA	NA	NA	NA	NA	NA
13	Khor 2014	Intervention	Khor 2014	Table 4	Cream	NA	PP	Summary	Outcome	Glycemia	Glucose	Glucose AUC 4h	Glucose AUC 4hrs	Blood		NA		7	Mean	mmol/L.h	NA	NA	NA	NA	NA	SD	mg/dL per h	NA	NA	NA	NA	NA	NA	NA	NA	NA
13	Khor 2014	Intervention	Khor 2014	Table 4	Cream	NA	PP	Summary	Outcome	Immune	IL-6	IL-6 AUC 4h	IL-6 AUC 4hrs	Blood		NA		7	Mean	pg/ml.h	NA	NA	NA	NA	NA	SD	pg/ml per h	NA	NA	NA	NA	NA	NA	NA	NA	NA
13	Khor 2014	Intervention	Khor 2014	Table 4	Cream	NA	PP	Summary	Outcome	Antioxidation	Malondialdehyde	Malondialdehyde AUC 4h	MDA AUC 4hrs	Blood		NA		7	Mean	umol/L.h	NA	NA	NA	NA	NA	SD	μmol/L per h	NA	NA	NA	NA	NA	NA	NA	NA	NA
13	Khor 2014	Intervention	Khor 2014	Table 4	Cream	NA	PP	Summary	Outcome	Antioxidation	Protein carbonyls	Protein carbonyls AUC 4h	Protein carbonyls AUC 4hrs	Blood		NA		7	Mean	nmol/mg protein.h	NA	NA	NA	NA	NA	SD	nmol/mg protein per h	NA	NA	NA	NA	NA	NA	NA	NA	NA
13	Khor 2014	Intervention	Khor 2014	Table 4	Cream	NA	PP	Summary	Outcome	Lipids	Total cholesterol	Cholesterol AUC 4h	Cholesterol AUC 4hrs	Blood		NA		7	Mean	mmol/L.h	400.1	8.92	23.6	376.5	423.7	SD	mmol/L per h	400.1	400	400	400	8.91996	23.6	376.5	423.7	NA
13	Khor 2014	Intervention	Khor 2014	Table 4	Cream	NA	PP	Summary	Outcome	Lipids	Triglycerides	Triglycerides AUC 4h	Triglycerides AUC 4hrs	Blood		NA		7	Mean	mmol/L.h	530.1	51.86	137.2	392.9	667.3	SD	mmol/L per h	530.1	530	530	530	51.8567	137.2	392.9	667.3	NA
13	Khor 2014	Intervention	Khor 2014	Table 4	Ice cream	NA	PP	Summary	Outcome	Antioxidation	Antioxidant capacity	Antioxidant capacity AUC 4h	Antioxidant capacity AUC 4hrs	Blood		NA		7	Mean	nmol/mg protein.h	NA	NA	NA	NA	NA	SD	nmol/mg protein per h	NA	NA	NA	NA	NA	NA	NA	NA	NA
13	Khor 2014	Intervention	Khor 2014	Table 4	Ice cream	NA	PP	Summary	Outcome	Immune	CD66b	CD66b AUC 4h	CD66b AUC 4hrs	Blood		NA		7	Mean	MFI.h	NA	NA	NA	NA	NA	SD	MFI per h	NA	NA	NA	NA	NA	NA	NA	NA	NA
13	Khor 2014	Intervention	Khor 2014	Table 4	Ice cream	NA	PP	Summary	Outcome	Glycemia	Glucose	Glucose AUC 4h	Glucose AUC 4hrs	Blood		NA		7	Mean	mmol/L.h	NA	NA	NA	NA	NA	SD	mg/dL per h	NA	NA	NA	NA	NA	NA	NA	NA	NA
13	Khor 2014	Intervention	Khor 2014	Table 4	Ice cream	NA	PP	Summary	Outcome	Immune	IL-6	IL-6 AUC 4h	IL-6 AUC 4hrs	Blood		NA		7	Mean	pg/ml.h	NA	NA	NA	NA	NA	SD	pg/ml per h	NA	NA	NA	NA	NA	NA	NA	NA	NA
13	Khor 2014	Intervention	Khor 2014	Table 4	Ice cream	NA	PP	Summary	Outcome	Antioxidation	Malondialdehyde	Malondialdehyde AUC 4h	MDA AUC 4hrs	Blood		NA		7	Mean	umol/L.h	NA	NA	NA	NA	NA	SD	μmol/L per h	NA	NA	NA	NA	NA	NA	NA	NA	NA
13	Khor 2014	Intervention	Khor 2014	Table 4	Ice cream	NA	PP	Summary	Outcome	Antioxidation	Protein carbonyls	Protein carbonyls AUC 4h	Protein carbonyls AUC 4hrs	Blood		NA		7	Mean	nmol/mg protein.h	NA	NA	NA	NA	NA	SD	nmol/mg protein per h	NA	NA	NA	NA	NA	NA	NA	NA	NA
13	Khor 2014	Intervention	Khor 2014	Table 4	Ice cream	NA	PP	Summary	Outcome	Lipids	Total cholesterol	Cholesterol AUC 4h	Cholesterol AUC 4hrs	Blood		NA		7	Mean	mmol/L.h	385	5.06	13.4	371.6	398.4	SD	mmol/L per h	385	385	385	380	5.06472	13.4	371.6	398.4	NA
13	Khor 2014	Intervention	Khor 2014	Table 4	Ice cream	NA	PP	Summary	Outcome	Lipids	Triglycerides	Triglycerides AUC 4h	Triglycerides AUC 4hrs	Blood		NA		7	Mean	mmol/L.h	548.3	23.74	62.8	485.5	611.1	SD	mmol/L per h	548.3	548	545	540	23.7362	62.8	485.5	611.1	NA
13	Khor 2014	Intervention	Khor 2014	Table 4	Sugar	NA	PP	Summary	Outcome	Antioxidation	Antioxidant capacity	Antioxidant capacity AUC 4h	Antioxidant capacity AUC 4hrs	Blood		NA		7	Mean	nmol/mg protein.h	NA	NA	NA	NA	NA	SD	nmol/mg protein per h	NA	NA	NA	NA	NA	NA	NA	NA	NA
13	Khor 2014	Intervention	Khor 2014	Table 4	Sugar	NA	PP	Summary	Outcome	Immune	CD66b	CD66b AUC 4h	CD66b AUC 4hrs	Blood		NA		7	Mean	MFI.h	NA	NA	NA	NA	NA	SD	MFI per h	NA	NA	NA	NA	NA	NA	NA	NA	NA
13	Khor 2014	Intervention	Khor 2014	Table 4	Sugar	NA	PP	Summary	Outcome	Glycemia	Glucose	Glucose AUC 4h	Glucose AUC 4hrs	Blood		NA		7	Mean	mmol/L.h	NA	NA	NA	NA	NA	SD	mg/dL per h	NA	NA	NA	NA	NA	NA	NA	NA	NA
13	Khor 2014	Intervention	Khor 2014	Table 4	Sugar	NA	PP	Summary	Outcome	Immune	IL-6	IL-6 AUC 4h	IL-6 AUC 4hrs	Blood		NA		7	Mean	pg/ml.h	NA	NA	NA	NA	NA	SD	pg/ml per h	NA	NA	NA	NA	NA	NA	NA	NA	NA
13	Khor 2014	Intervention	Khor 2014	Table 4	Sugar	NA	PP	Summary	Outcome	Antioxidation	Malondialdehyde	Malondialdehyde AUC 4h	MDA AUC 4hrs	Blood		NA		7	Mean	umol/L.h	NA	NA	NA	NA	NA	SD	μmol/L per h	NA	NA	NA	NA	NA	NA	NA	NA	NA
13	Khor 2014	Intervention	Khor 2014	Table 4	Sugar	NA	PP	Summary	Outcome	Antioxidation	Protein carbonyls	Protein carbonyls AUC 4h	Protein carbonyls AUC 4hrs	Blood		NA		7	Mean	nmol/mg protein.h	NA	NA	NA	NA	NA	SD	nmol/mg protein per h	NA	NA	NA	NA	NA	NA	NA	NA	NA
13	Khor 2014	Intervention	Khor 2014	Table 4	Sugar	NA	PP	Summary	Outcome	Lipids	Total cholesterol	Cholesterol AUC 4h	Cholesterol AUC 4hrs	Blood		NA		7	Mean	mmol/L.h	394.2	3.06	8.1	386.1	402.3	SD	mmol/L per h	394.2	394	390	390	3.06151	8.1	386.1	402.3	NA
13	Khor 2014	Intervention	Khor 2014	Table 4	Sugar	NA	PP	Summary	Outcome	Lipids	Triglycerides	Triglycerides AUC 4h	Triglycerides AUC 4hrs	Blood		NA		7	Mean	mmol/L.h	366.9	12.81	33.9	333	400.8	SD	mmol/L per h	366.9	366	365	360	12.813	33.9	333	400.8	NA
14	Hannon 2020	Intervention	Persea americana for Total Health (PATH) Study (NCT02740439)	Fig 2	Avo	CC genotype	PP	Summary	Outcome	Lipids	Total cholesterol	Total cholesterol	Cholesterol, total	Blood	0	weeks	0	23	Mean	mg/dL						SD	mg/dL									NA
14	Hannon 2020	Intervention	Persea americana for Total Health (PATH) Study (NCT02740439)	Fig 2	Avo	CC/TT genotype	PP	Summary	Outcome	Lipids	Total cholesterol	Total cholesterol	Cholesterol, total	Blood	0	weeks	0	39	Mean	mg/dL						SD	mg/dL									NA
14	Hannon 2020	Intervention	Persea americana for Total Health (PATH) Study (NCT02740439)	Fig 2	Avo	CC genotype	PP	Summary	Outcome	Lipids	Total cholesterol	Total cholesterol	Cholesterol, total	Blood	12	weeks	12	23	Mean	mg/dL						SD	mg/dL									NA
14	Hannon 2020	Intervention	Persea americana for Total Health (PATH) Study (NCT02740439)	Fig 2	Avo	CC/TT genotype	PP	Summary	Outcome	Lipids	Total cholesterol	Total cholesterol	Cholesterol, total	Blood	12	weeks	12	39	Mean	mg/dL						SD	mg/dL									NA
14	Hannon 2020	Intervention	Persea americana for Total Health (PATH) Study (NCT02740439)	Fig 2	Control	CC genotype	PP	Summary	Outcome	Lipids	Total cholesterol	Total cholesterol	Cholesterol, total	Blood	0	weeks	0	20	Mean	mg/dL						SD	mg/dL									NA
14	Hannon 2020	Intervention	Persea americana for Total Health (PATH) Study (NCT02740439)	Fig 2	Control	CC/TT genotype	PP	Summary	Outcome	Lipids	Total cholesterol	Total cholesterol	Cholesterol, total	Blood	0	weeks	0	34	Mean	mg/dL						SD	mg/dL									NA
14	Hannon 2020	Intervention	Persea americana for Total Health (PATH) Study (NCT02740439)	Fig 2	Control	CC genotype	PP	Summary	Outcome	Lipids	Total cholesterol	Total cholesterol	Cholesterol, total	Blood	12	weeks	12	20	Mean	mg/dL						SD	mg/dL									NA
14	Hannon 2020	Intervention	Persea americana for Total Health (PATH) Study (NCT02740439)	Fig 2	Control	CC/TT genotype	PP	Summary	Outcome	Lipids	Total cholesterol	Total cholesterol	Cholesterol, total	Blood	12	weeks	12	34	Mean	mg/dL						SD	mg/dL									NA
14	Hannon 2020	Intervention	Persea americana for Total Health (PATH) Study (NCT02740439)	Figure 1a	Avo	NA	PP	Summary	Outcome	Lipids	Total cholesterol	Total cholesterol	Total cholestrol	Blood	12	weeks	12	61	NA	mg/dL						NA	mg/dL									NA
14	Hannon 2020	Intervention	Persea americana for Total Health (PATH) Study (NCT02740439)	Figure 1a	Control	NA	PP	Summary	Outcome	Lipids	Total cholesterol	Total cholesterol	Total cholestrol	Blood	12	weeks	12	54	NA	mg/dL						NA	mg/dL									NA
14	Hannon 2020	Intervention	Persea americana for Total Health (PATH) Study (NCT02740439)	Figure 1b	Avo	NA	PP	Summary	Outcome	Lipids	HDL-C	HDL-C	HDL-C	Blood	12	weeks	12	61	NA	mg/dL						NA	mg/dL									NA
14	Hannon 2020	Intervention	Persea americana for Total Health (PATH) Study (NCT02740439)	Figure 1b	Control	NA	PP	Summary	Outcome	Lipids	HDL-C	HDL-C	HDL-C	Blood	12	weeks	12	54	NA	mg/dL						NA	mg/dL									NA
14	Hannon 2020	Intervention	Persea americana for Total Health (PATH) Study (NCT02740439)	Figure 1c	Avo	NA	PP	Summary	Outcome	Lipids	Triglycerides	Triglycerides	Triglycerides	Blood	12	weeks	12	61	NA	mg/dL						NA	mg/dL									NA
14	Hannon 2020	Intervention	Persea americana for Total Health (PATH) Study (NCT02740439)	Figure 1c	Control	NA	PP	Summary	Outcome	Lipids	Triglycerides	Triglycerides	Triglycerides	Blood	12	weeks	12	54	NA	mg/dL						NA	mg/dL									NA
14	Hannon 2020	Intervention	Persea americana for Total Health (PATH) Study (NCT02740439)	Methods section;Table1	Avo	Female	Planned	Summary	Dietary	Avocado intake	Avocado intake	Avocado intake	Avocado intake	NA		NA		23	Absolute value	g/d	140					NA	g/d	140	140	140	140					NA
14	Hannon 2020	Intervention	Persea americana for Total Health (PATH) Study (NCT02740439)	Methods section;Table1	Avo	Male	Planned	Summary	Dietary	Avocado intake	Avocado intake	Avocado intake	Avocado intake	NA		NA		38	Absolute value	g/d	175					NA	g/d	175	175	175	170					NA
14	Hannon 2020	Intervention	Persea americana for Total Health (PATH) Study (NCT02740439)	Methods section;Table1	Control	NA	Planned	Summary	Dietary	Avocado intake	Avocado intake	Avocado intake	Avocado intake	NA		NA		54	Absolute value	g/d	0					NA	g/d	0	0	0	0					NA
14	Hannon 2020	Intervention	Persea americana for Total Health (PATH) Study (NCT02740439)	Supplemental Table 2	Avo	NA	ITT	Summary	Dietary	Macronutrients	Carbohydrates	Carbohydrates	Carbohydrate	NA	0	weeks	0	61	Mean	%E	NA	NA	NA	NA	NA	SD	%E	NA	NA	NA	NA	NA	NA	NA	NA	NA
14	Hannon 2020	Intervention	Persea americana for Total Health (PATH) Study (NCT02740439)	Supplemental Table 2	Avo	NA	ITT	Summary	Dietary	Macronutrients	Carbohydrates	Carbohydrates	Carbohydrate	NA	12	weeks	12	61	Mean	%E	NA	NA	NA	NA	NA	SD	%E	NA	NA	NA	NA	NA	NA	NA	NA	NA
14	Hannon 2020	Intervention	Persea americana for Total Health (PATH) Study (NCT02740439)	Supplemental Table 2	Avo	NA	ITT	Summary	Dietary	Energy	Energy	Energy	Energy	NA	0	weeks	0	61	Mean	kcal	NA	NA	NA	NA	NA	SD	kcal/d	NA	NA	NA	NA	NA	NA	NA	NA	NA
14	Hannon 2020	Intervention	Persea americana for Total Health (PATH) Study (NCT02740439)	Supplemental Table 2	Avo	NA	ITT	Summary	Dietary	Energy	Energy	Energy	Energy	NA	12	weeks	12	61	Mean	kcal	NA	NA	NA	NA	NA	SD	kcal/d	NA	NA	NA	NA	NA	NA	NA	NA	NA
14	Hannon 2020	Intervention	Persea americana for Total Health (PATH) Study (NCT02740439)	Supplemental Table 2	Avo	NA	ITT	Summary	Dietary	Macronutrients	Fat	Fat	Total fat	NA	0	weeks	0	61	Mean	%E	NA	NA	NA	NA	NA	SD	%E	NA	NA	NA	NA	NA	NA	NA	NA	NA
14	Hannon 2020	Intervention	Persea americana for Total Health (PATH) Study (NCT02740439)	Supplemental Table 2	Avo	NA	ITT	Summary	Dietary	Macronutrients	Fat	Fat	Total fat	NA	12	weeks	12	61	Mean	%E	NA	NA	NA	NA	NA	SD	%E	NA	NA	NA	NA	NA	NA	NA	NA	NA
14	Hannon 2020	Intervention	Persea americana for Total Health (PATH) Study (NCT02740439)	Supplemental Table 2	Avo	NA	ITT	Summary	Dietary	Fiber	Fiber	Fiber	Fiber	NA	0	weeks	0	61	Mean	g/d	NA	NA	NA	NA	NA	SD	g/d	NA	NA	NA	NA	NA	NA	NA	NA	NA
14	Hannon 2020	Intervention	Persea americana for Total Health (PATH) Study (NCT02740439)	Supplemental Table 2	Avo	NA	ITT	Summary	Dietary	Fiber	Fiber	Fiber	Fiber	NA	12	weeks	12	61	Mean	g/d	NA	NA	NA	NA	NA	SD	g/d	NA	NA	NA	NA	NA	NA	NA	NA	NA
14	Hannon 2020	Intervention	Persea americana for Total Health (PATH) Study (NCT02740439)	Supplemental Table 2	Avo	NA	ITT	Summary	Dietary	Fiber	Fiber	Insoluble fiber	Insoluble fiber	NA	0	weeks	0	61	Mean	g/d	NA	NA	NA	NA	NA	SD	g/d	NA	NA	NA	NA	NA	NA	NA	NA	NA
14	Hannon 2020	Intervention	Persea americana for Total Health (PATH) Study (NCT02740439)	Supplemental Table 2	Avo	NA	ITT	Summary	Dietary	Fiber	Fiber	Insoluble fiber	Insoluble fiber	NA	12	weeks	12	61	Mean	g/d	NA	NA	NA	NA	NA	SD	g/d	NA	NA	NA	NA	NA	NA	NA	NA	NA
14	Hannon 2020	Intervention	Persea americana for Total Health (PATH) Study (NCT02740439)	Supplemental Table 2	Avo	NA	ITT	Summary	Dietary	Fiber	Fiber	Pectins	Pectins	NA	0	weeks	0	61	Mean	g/d	NA	NA	NA	NA	NA	SD	g/d	NA	NA	NA	NA	NA	NA	NA	NA	NA
14	Hannon 2020	Intervention	Persea americana for Total Health (PATH) Study (NCT02740439)	Supplemental Table 2	Avo	NA	ITT	Summary	Dietary	Fiber	Fiber	Pectins	Pectins	NA	12	weeks	12	61	Mean	g/d	NA	NA	NA	NA	NA	SD	g/d	NA	NA	NA	NA	NA	NA	NA	NA	NA
14	Hannon 2020	Intervention	Persea americana for Total Health (PATH) Study (NCT02740439)	Supplemental Table 2	Avo	NA	ITT	Summary	Dietary	Fiber	Fiber	Soluble fiber	Soluble fiber	NA	0	weeks	0	61	Mean	g/d	NA	NA	NA	NA	NA	SD	g/d	NA	NA	NA	NA	NA	NA	NA	NA	NA
14	Hannon 2020	Intervention	Persea americana for Total Health (PATH) Study (NCT02740439)	Supplemental Table 2	Avo	NA	ITT	Summary	Dietary	Fiber	Fiber	Soluble fiber	Soluble fiber	NA	12	weeks	12	61	Mean	g/d	NA	NA	NA	NA	NA	SD	g/d	NA	NA	NA	NA	NA	NA	NA	NA	NA
14	Hannon 2020	Intervention	Persea americana for Total Health (PATH) Study (NCT02740439)	Supplemental Table 2	Avo	NA	ITT	Summary	Dietary	Fatty acids	MUFA	MUFA	MUFA	NA	0	weeks	0	61	Mean	%E	NA	NA	NA	NA	NA	SD	%E	NA	NA	NA	NA	NA	NA	NA	NA	NA
14	Hannon 2020	Intervention	Persea americana for Total Health (PATH) Study (NCT02740439)	Supplemental Table 2	Avo	NA	ITT	Summary	Dietary	Fatty acids	MUFA	MUFA	MUFA	NA	12	weeks	12	61	Mean	%E	NA	NA	NA	NA	NA	SD	%E	NA	NA	NA	NA	NA	NA	NA	NA	NA
14	Hannon 2020	Intervention	Persea americana for Total Health (PATH) Study (NCT02740439)	Supplemental Table 2	Avo	NA	ITT	Summary	Dietary	Macronutrients	Protein	Protein	Protein	NA	0	weeks	0	61	Mean	%E	NA	NA	NA	NA	NA	SD	%E	NA	NA	NA	NA	NA	NA	NA	NA	NA
14	Hannon 2020	Intervention	Persea americana for Total Health (PATH) Study (NCT02740439)	Supplemental Table 2	Avo	NA	ITT	Summary	Dietary	Macronutrients	Protein	Protein	Protein	NA	12	weeks	12	61	Mean	%E	NA	NA	NA	NA	NA	SD	%E	NA	NA	NA	NA	NA	NA	NA	NA	NA
14	Hannon 2020	Intervention	Persea americana for Total Health (PATH) Study (NCT02740439)	Supplemental Table 2	Avo	NA	ITT	Summary	Dietary	Fatty acids	PUFA	PUFA	PUFA	NA	0	weeks	0	61	Mean	%E	NA	NA	NA	NA	NA	SD	%E	NA	NA	NA	NA	NA	NA	NA	NA	NA
14	Hannon 2020	Intervention	Persea americana for Total Health (PATH) Study (NCT02740439)	Supplemental Table 2	Avo	NA	ITT	Summary	Dietary	Fatty acids	PUFA	PUFA	PUFA	NA	12	weeks	12	61	Mean	%E	NA	NA	NA	NA	NA	SD	%E	NA	NA	NA	NA	NA	NA	NA	NA	NA
14	Hannon 2020	Intervention	Persea americana for Total Health (PATH) Study (NCT02740439)	Supplemental Table 2	Avo	NA	ITT	Summary	Dietary	Fatty acids	SFA	SFA	SFA	NA	0	weeks	0	61	Mean	%E	NA	NA	NA	NA	NA	SD	%E	NA	NA	NA	NA	NA	NA	NA	NA	NA
14	Hannon 2020	Intervention	Persea americana for Total Health (PATH) Study (NCT02740439)	Supplemental Table 2	Avo	NA	ITT	Summary	Dietary	Fatty acids	SFA	SFA	SFA	NA	12	weeks	12	61	Mean	%E	NA	NA	NA	NA	NA	SD	%E	NA	NA	NA	NA	NA	NA	NA	NA	NA
14	Hannon 2020	Intervention	Persea americana for Total Health (PATH) Study (NCT02740439)	Supplemental Table 2	Control	NA	ITT	Summary	Dietary	Macronutrients	Carbohydrates	Carbohydrates	Carbohydrate	NA	0	weeks	0	54	Mean	%E	NA	NA	NA	NA	NA	SD	%E	NA	NA	NA	NA	NA	NA	NA	NA	NA
14	Hannon 2020	Intervention	Persea americana for Total Health (PATH) Study (NCT02740439)	Supplemental Table 2	Control	NA	ITT	Summary	Dietary	Macronutrients	Carbohydrates	Carbohydrates	Carbohydrate	NA	12	weeks	12	54	Mean	%E	NA	NA	NA	NA	NA	SD	%E	NA	NA	NA	NA	NA	NA	NA	NA	NA
14	Hannon 2020	Intervention	Persea americana for Total Health (PATH) Study (NCT02740439)	Supplemental Table 2	Control	NA	ITT	Summary	Dietary	Energy	Energy	Energy	Energy	NA	0	weeks	0	54	Mean	kcal	NA	NA	NA	NA	NA	SD	kcal/d	NA	NA	NA	NA	NA	NA	NA	NA	NA
14	Hannon 2020	Intervention	Persea americana for Total Health (PATH) Study (NCT02740439)	Supplemental Table 2	Control	NA	ITT	Summary	Dietary	Energy	Energy	Energy	Energy	NA	12	weeks	12	54	Mean	kcal	NA	NA	NA	NA	NA	SD	kcal/d	NA	NA	NA	NA	NA	NA	NA	NA	NA
14	Hannon 2020	Intervention	Persea americana for Total Health (PATH) Study (NCT02740439)	Supplemental Table 2	Control	NA	ITT	Summary	Dietary	Macronutrients	Fat	Fat	Total fat	NA	0	weeks	0	54	Mean	%E	NA	NA	NA	NA	NA	SD	%E	NA	NA	NA	NA	NA	NA	NA	NA	NA
14	Hannon 2020	Intervention	Persea americana for Total Health (PATH) Study (NCT02740439)	Supplemental Table 2	Control	NA	ITT	Summary	Dietary	Macronutrients	Fat	Fat	Total fat	NA	12	weeks	12	54	Mean	%E	NA	NA	NA	NA	NA	SD	%E	NA	NA	NA	NA	NA	NA	NA	NA	NA
14	Hannon 2020	Intervention	Persea americana for Total Health (PATH) Study (NCT02740439)	Supplemental Table 2	Control	NA	ITT	Summary	Dietary	Fiber	Fiber	Fiber	Fiber	NA	0	weeks	0	54	Mean	g/d	NA	NA	NA	NA	NA	SD	g/d	NA	NA	NA	NA	NA	NA	NA	NA	NA
14	Hannon 2020	Intervention	Persea americana for Total Health (PATH) Study (NCT02740439)	Supplemental Table 2	Control	NA	ITT	Summary	Dietary	Fiber	Fiber	Fiber	Fiber	NA	12	weeks	12	54	Mean	g/d	NA	NA	NA	NA	NA	SD	g/d	NA	NA	NA	NA	NA	NA	NA	NA	NA
14	Hannon 2020	Intervention	Persea americana for Total Health (PATH) Study (NCT02740439)	Supplemental Table 2	Control	NA	ITT	Summary	Dietary	Fiber	Fiber	Insoluble fiber	Insoluble fiber	NA	0	weeks	0	54	Mean	g/d	NA	NA	NA	NA	NA	SD	g/d	NA	NA	NA	NA	NA	NA	NA	NA	NA
14	Hannon 2020	Intervention	Persea americana for Total Health (PATH) Study (NCT02740439)	Supplemental Table 2	Control	NA	ITT	Summary	Dietary	Fiber	Fiber	Insoluble fiber	Insoluble fiber	NA	12	weeks	12	54	Mean	g/d	NA	NA	NA	NA	NA	SD	g/d	NA	NA	NA	NA	NA	NA	NA	NA	NA
14	Hannon 2020	Intervention	Persea americana for Total Health (PATH) Study (NCT02740439)	Supplemental Table 2	Control	NA	ITT	Summary	Dietary	Fiber	Fiber	Pectins	Pectins	NA	0	weeks	0	54	Mean	g/d	NA	NA	NA	NA	NA	SD	g/d	NA	NA	NA	NA	NA	NA	NA	NA	NA
14	Hannon 2020	Intervention	Persea americana for Total Health (PATH) Study (NCT02740439)	Supplemental Table 2	Control	NA	ITT	Summary	Dietary	Fiber	Fiber	Pectins	Pectins	NA	12	weeks	12	54	Mean	g/d	NA	NA	NA	NA	NA	SD	g/d	NA	NA	NA	NA	NA	NA	NA	NA	NA
14	Hannon 2020	Intervention	Persea americana for Total Health (PATH) Study (NCT02740439)	Supplemental Table 2	Control	NA	ITT	Summary	Dietary	Fiber	Fiber	Soluble fiber	Soluble fiber	NA	0	weeks	0	54	Mean	g/d	NA	NA	NA	NA	NA	SD	g/d	NA	NA	NA	NA	NA	NA	NA	NA	NA
14	Hannon 2020	Intervention	Persea americana for Total Health (PATH) Study (NCT02740439)	Supplemental Table 2	Control	NA	ITT	Summary	Dietary	Fiber	Fiber	Soluble fiber	Soluble fiber	NA	12	weeks	12	54	Mean	g/d	NA	NA	NA	NA	NA	SD	g/d	NA	NA	NA	NA	NA	NA	NA	NA	NA
14	Hannon 2020	Intervention	Persea americana for Total Health (PATH) Study (NCT02740439)	Supplemental Table 2	Control	NA	ITT	Summary	Dietary	Fatty acids	MUFA	MUFA	MUFA	NA	0	weeks	0	54	Mean	%E	NA	NA	NA	NA	NA	SD	%E	NA	NA	NA	NA	NA	NA	NA	NA	NA
14	Hannon 2020	Intervention	Persea americana for Total Health (PATH) Study (NCT02740439)	Supplemental Table 2	Control	NA	ITT	Summary	Dietary	Fatty acids	MUFA	MUFA	MUFA	NA	12	weeks	12	54	Mean	%E	NA	NA	NA	NA	NA	SD	%E	NA	NA	NA	NA	NA	NA	NA	NA	NA
14	Hannon 2020	Intervention	Persea americana for Total Health (PATH) Study (NCT02740439)	Supplemental Table 2	Control	NA	ITT	Summary	Dietary	Macronutrients	Protein	Protein	Protein	NA	0	weeks	0	54	Mean	%E	NA	NA	NA	NA	NA	SD	%E	NA	NA	NA	NA	NA	NA	NA	NA	NA
14	Hannon 2020	Intervention	Persea americana for Total Health (PATH) Study (NCT02740439)	Supplemental Table 2	Control	NA	ITT	Summary	Dietary	Macronutrients	Protein	Protein	Protein	NA	12	weeks	12	54	Mean	%E	NA	NA	NA	NA	NA	SD	%E	NA	NA	NA	NA	NA	NA	NA	NA	NA
14	Hannon 2020	Intervention	Persea americana for Total Health (PATH) Study (NCT02740439)	Supplemental Table 2	Control	NA	ITT	Summary	Dietary	Fatty acids	PUFA	PUFA	PUFA	NA	0	weeks	0	54	Mean	%E	NA	NA	NA	NA	NA	SD	%E	NA	NA	NA	NA	NA	NA	NA	NA	NA
14	Hannon 2020	Intervention	Persea americana for Total Health (PATH) Study (NCT02740439)	Supplemental Table 2	Control	NA	ITT	Summary	Dietary	Fatty acids	PUFA	PUFA	PUFA	NA	12	weeks	12	54	Mean	%E	NA	NA	NA	NA	NA	SD	%E	NA	NA	NA	NA	NA	NA	NA	NA	NA
14	Hannon 2020	Intervention	Persea americana for Total Health (PATH) Study (NCT02740439)	Supplemental Table 2	Control	NA	ITT	Summary	Dietary	Fatty acids	SFA	SFA	SFA	NA	0	weeks	0	54	Mean	%E	NA	NA	NA	NA	NA	SD	%E	NA	NA	NA	NA	NA	NA	NA	NA	NA
14	Hannon 2020	Intervention	Persea americana for Total Health (PATH) Study (NCT02740439)	Supplemental Table 2	Control	NA	ITT	Summary	Dietary	Fatty acids	SFA	SFA	SFA	NA	12	weeks	12	54	Mean	%E	NA	NA	NA	NA	NA	SD	%E	NA	NA	NA	NA	NA	NA	NA	NA	NA
14	Hannon 2020	Intervention	Persea americana for Total Health (PATH) Study (NCT02740439)	Table 2	Avo	NA	ITT	Summary	Subject Characteristics	Age	Age	Age	Age	NA		NA		61	Mean	years	35.4	0.7	5.47	29.93	40.87	SD	years	35.4	35	35	30	0.7	5.46717	29.9328	40.8672	NA
[truncated: 7,979 more rows]
